# Supplementary material for: Identification of Candidate Genes Associated with Pulp Color by Transcriptomic Analysis of ‘Huaxiu’ Plum (Prunus salicina Lindl.) during Fruit-Ripening
Source: MDPI journal article supplement (doi:10.3390/cimb44120434), 2022-12-15
Supplement: s1 [file s1]

**Table S8.** Summary of KEGG pathways enrichment involved in the 'Huaxiu' plums (*P. salicina*) unigenes

|    | Pathway                                     | All genes with<br>pathway annotation<br>(7595) | Pathway ID |
|----|---------------------------------------------|------------------------------------------------|------------|
| 1  | Ribosome                                    | 644 (8.48%)                                    | ko03010    |
| 2  | Carbon metabolism                           | 629 (8.28%)                                    | ko01200    |
| 3  | Biosynthesis of amino acids                 | 517 (6.81%)                                    | ko01230    |
| 4  | Protein processing in endoplasmic reticulum | 387 (5.1%)                                     | ko04141    |
| 5  | Plant-pathogen interaction                  | 322 (4.24%)                                    | ko04626    |
| 6  | Spliceosome                                 | 322 (4.24%)                                    | ko03040    |
| 7  | Oxidative phosphorylation                   | 308 (4.06%)                                    | ko00190    |
| 8  | RNA transport                               | 299 (3.94%)                                    | ko03013    |
| 9  | Starch and sucrose metabolism               | 288 (3.79%)                                    | ko00500    |
| 10 | Glycolysis / Gluconeogenesis                | 275 (3.62%)                                    | ko00010    |
| 11 | Plant hormone signal transduction           | 247 (3.25%)                                    | ko04075    |
| 12 | Purine metabolism                           | 238 (3.13%)                                    | ko00230    |
| 13 | Endocytosis                                 | 234 (3.08%)                                    | ko04144    |
| 14 | Carbon fixation in photosynthetic organisms | 229 (3.02%)                                    | ko00710    |
| 15 | Ubiquitin mediated proteolysis              | 211 (2.78%)                                    | ko04120    |
| 16 | Glyoxylate and dicarboxylate metabolism     | 200 (2.63%)                                    | ko00630    |
| 17 | Amino sugar and nucleotide sugar metabolism | 186 (2.45%)                                    | ko00520    |
| 18 | Pyrimidine metabolism                       | 185 (2.44%)                                    | ko00240    |
| 19 | Pyruvate metabolism                         | 185 (2.44%)                                    | ko00620    |
| 20 | Phenylpropanoid biosynthesis                | 181 (2.38%)                                    | ko00940    |
| 21 | Peroxisome                                  | 180 (2.37%)                                    | ko04146    |
| 22 | mRNA surveillance pathway                   | 174 (2.29%)                                    | ko03015    |
| 23 | RNA degradation                             | 170 (2.24%)                                    | ko03018    |
| 24 | Cysteine and methionine metabolism          | 169 (2.23%)                                    | ko00270    |
| 25 | Phagosome                                   | 164 (2.16%)                                    | ko04145    |
| 26 | Glycine, serine and threonine metabolism    | 154 (2.03%)                                    | ko00260    |
| 27 | Photosynthesis                              | 136 (1.79%)                                    | ko00195    |
| 28 | Ribosome biogenesis in eukaryotes           | 133 (1.75%)                                    | ko03008    |
| 29 | Fatty acid metabolism                       | 132 (1.74%)                                    | ko01212    |
| 30 | Glutathione metabolism                      | 131 (1.72%)                                    | ko00480    |
| 31 | Aminoacyl-tRNA biosynthesis                 | 125 (1.65%)                                    | ko00970    |
| 32 | Glycerophospholipid metabolism              | 123 (1.62%)                                    | ko00564    |
| 33 | Citrate cycle (TCA cycle)                   | 122 (1.61%)                                    | ko00020    |
| 34 | Pentose phosphate pathway                   | 118 (1.55%)                                    | ko00030    |
| 35 | Pentose and glucuronate interconversions    | 118 (1.55%)                                    | ko00040    |
| 36 | Alanine, aspartate and glutamate metabolism | 117 (1.54%)                                    | ko00250    |
| 37 | Proteasome                                  | 117 (1.54%)                                    | ko03050    |
| 38 | 2-Oxocarboxylic acid metabolism             | 110 (1.45%)                                    | ko01210    |
| 39 | Fructose and mannose metabolism             | 107 (1.41%)                                    | ko00051    |

|    |                                                     |             |         |
|----|-----------------------------------------------------|-------------|---------|
| 40 | Valine, leucine and isoleucine degradation          | 102 (1.34%) | ko00280 |
| 41 | Phosphatidylinositol signaling system               | 97 (1.28%)  | ko04070 |
| 42 | Fatty acid degradation                              | 97 (1.28%)  | ko00071 |
| 43 | Glycerolipid metabolism                             | 96 (1.26%)  | ko00561 |
| 44 | Arginine and proline metabolism                     | 95 (1.25%)  | ko00330 |
| 45 | Galactose metabolism                                | 94 (1.24%)  | ko00052 |
| 46 | Nucleotide excision repair                          | 94 (1.24%)  | ko03420 |
| 47 | Protein export                                      | 90 (1.18%)  | ko03060 |
| 48 | Propanoate metabolism                               | 87 (1.15%)  | ko00640 |
| 49 | Inositol phosphate metabolism                       | 87 (1.15%)  | ko00562 |
| 50 | beta-Alanine metabolism                             | 87 (1.15%)  | ko00410 |
| 51 | Homologous recombination                            | 85 (1.12%)  | ko03440 |
| 52 | Ascorbate and aldarate metabolism                   | 83 (1.09%)  | ko00053 |
| 53 | Porphyrin and chlorophyll metabolism                | 83 (1.09%)  | ko00860 |
| 54 | Photosynthesis - antenna proteins                   | 82 (1.08%)  | ko00196 |
| 55 | DNA replication                                     | 81 (1.07%)  | ko03030 |
| 56 | Arginine biosynthesis                               | 80 (1.05%)  | ko00220 |
| 57 | Terpenoid backbone biosynthesis                     | 79 (1.04%)  | ko00900 |
| 58 | Fatty acid biosynthesis                             | 79 (1.04%)  | ko00061 |
| 59 | alpha-Linolenic acid metabolism                     | 78 (1.03%)  | ko00592 |
| 60 | Tyrosine metabolism                                 | 75 (0.99%)  | ko00350 |
| 61 | Phenylalanine metabolism                            | 73 (0.96%)  | ko00360 |
| 62 | Cyanoamino acid metabolism                          | 72 (0.95%)  | ko00460 |
| 63 | Phenylalanine, tyrosine and tryptophan biosynthesis | 72 (0.95%)  | ko00400 |
| 64 | Nitrogen metabolism                                 | 70 (0.92%)  | ko00910 |
| 65 | Base excision repair                                | 69 (0.91%)  | ko03410 |
| 66 | Ubiquinone and other terpenoid-quinone biosynthesis | 67 (0.88%)  | ko00130 |
| 67 | ABC transporters                                    | 67 (0.88%)  | ko02010 |
| 68 | Lysine degradation                                  | 66 (0.87%)  | ko00310 |
| 69 | N-Glycan biosynthesis                               | 66 (0.87%)  | ko00510 |
| 70 | Mismatch repair                                     | 65 (0.86%)  | ko03430 |
| 71 | RNA polymerase                                      | 64 (0.84%)  | ko03020 |
| 72 | Basal transcription factors                         | 63 (0.83%)  | ko03022 |
| 73 | Sulfur metabolism                                   | 62 (0.82%)  | ko00920 |
| 74 | Circadian rhythm - plant                            | 59 (0.78%)  | ko04712 |
| 75 | Tryptophan metabolism                               | 59 (0.78%)  | ko00380 |
| 76 | Sphingolipid metabolism                             | 56 (0.74%)  | ko00600 |
| 77 | Biosynthesis of unsaturated fatty acids             | 54 (0.71%)  | ko01040 |
| 78 | Regulation of autophagy                             | 52 (0.68%)  | ko04140 |
| 79 | Butanoate metabolism                                | 52 (0.68%)  | ko00650 |
| 80 | Pantothenate and CoA biosynthesis                   | 52 (0.68%)  | ko00770 |
| 81 | SNARE interactions in vesicular transport           | 49 (0.65%)  | ko04130 |

|     |                                                        |            |         |
|-----|--------------------------------------------------------|------------|---------|
| 82  | Selenocompound metabolism                              | 49 (0.65%) | ko00450 |
| 83  | Histidine metabolism                                   | 47 (0.62%) | ko00340 |
| 84  | Carotenoid biosynthesis                                | 45 (0.59%) | ko00906 |
| 85  | Flavonoid biosynthesis                                 | 44 (0.58%) | ko00941 |
| 86  | Glycosylphosphatidylinositol(GPI)-anchor biosynthesis  | 43 (0.57%) | ko00563 |
| 87  | Valine, leucine and isoleucine biosynthesis            | 42 (0.55%) | ko00290 |
| 88  | One carbon pool by folate                              | 39 (0.51%) | ko00670 |
| 89  | Brassinosteroid biosynthesis                           | 36 (0.47%) | ko00905 |
| 90  | Nicotinate and nicotinamide metabolism                 | 36 (0.47%) | ko00760 |
| 91  | Other glycan degradation                               | 36 (0.47%) | ko00511 |
| 92  | Steroid biosynthesis                                   | 36 (0.47%) | ko00100 |
| 93  | Biotin metabolism                                      | 35 (0.46%) | ko00780 |
| 94  | Lysine biosynthesis                                    | 33 (0.43%) | ko00300 |
| 95  | Tropane, piperidine and pyridine alkaloid biosynthesis | 32 (0.42%) | ko00960 |
| 96  | Isoquinoline alkaloid biosynthesis                     | 32 (0.42%) | ko00950 |
| 97  | Glycosaminoglycan degradation                          | 30 (0.39%) | ko00531 |
| 98  | Fatty acid elongation                                  | 30 (0.39%) | ko00062 |
| 99  | Diterpenoid biosynthesis                               | 28 (0.37%) | ko00904 |
| 100 | Stilbenoid, diarylheptanoid and gingerol biosynthesis  | 28 (0.37%) | ko00945 |
| 101 | Ether lipid metabolism                                 | 27 (0.36%) | ko00565 |
| 102 | Monoterpenoid biosynthesis                             | 27 (0.36%) | ko00902 |
| 103 | Arachidonic acid metabolism                            | 25 (0.33%) | ko00590 |
| 104 | Linoleic acid metabolism                               | 25 (0.33%) | ko00591 |
| 105 | Sesquiterpenoid and triterpenoid biosynthesis          | 24 (0.32%) | ko00909 |
| 106 | Folate biosynthesis                                    | 24 (0.32%) | ko00790 |
| 107 | Sulfur relay system                                    | 23 (0.3%)  | ko04122 |
| 108 | Thiamine metabolism                                    | 21 (0.28%) | ko00730 |
| 109 | C5-Branched dibasic acid metabolism                    | 20 (0.26%) | ko00660 |
| 110 | Cutin, suberine and wax biosynthesis                   | 20 (0.26%) | ko00073 |
| 111 | Vitamin B6 metabolism                                  | 19 (0.25%) | ko00750 |
| 112 | Monobactam biosynthesis                                | 19 (0.25%) | ko00261 |
| 113 | Taurine and hypotaurine metabolism                     | 18 (0.24%) | ko00430 |
| 114 | Degradation of aromatic compounds                      | 17 (0.22%) | ko01220 |
| 115 | Riboflavin metabolism                                  | 16 (0.21%) | ko00740 |
| 116 | Glycosphingolipid biosynthesis - globo series          | 15 (0.2%)  | ko00603 |
| 117 | Non-homologous end-joining                             | 14 (0.18%) | ko03450 |
| 118 | Synthesis and degradation of ketone bodies             | 11 (0.14%) | ko00072 |
| 119 | Glycosphingolipid biosynthesis - ganglio series        | 9 (0.12%)  | ko00604 |
| 120 | Zeatin biosynthesis                                    | 8 (0.11%)  | ko00908 |
| 121 | Lipoic acid metabolism                                 | 8 (0.11%)  | ko00785 |
| 122 | Caffeine metabolism                                    | 4 (0.05%)  | ko00232 |

|     |                                      |           |         |
|-----|--------------------------------------|-----------|---------|
| 123 | Flavone and flavonol biosynthesis    | 4 (0.05%) | ko00944 |
| 124 | Other types of O-glycan biosynthesis | 4 (0.05%) | ko00514 |
| 125 | Glucosinolate biosynthesis           | 3 (0.04%) | ko00966 |
| 126 | Limonene and pinene degradation      | 3 (0.04%) | ko00903 |
| 127 | Anthocyanin biosynthesis             | 1 (0.01%) | ko00942 |
| 128 | Isoflavonoid biosynthesis            | 1 (0.01%) | ko00943 |
