# Supplementary material for: Identification of Candidate Genes Associated with Pulp Color by Transcriptomic Analysis of ‘Huaxiu’ Plum (Prunus salicina Lindl.) during Fruit-Ripening
Source: MDPI journal article supplement (doi:10.3390/cimb44120434), 2022-12-15
Supplement: s1 [file s1]

**Table S3.** The length distribution of the assembled unigenes

| Length of unigene | Number of unigenes | Percentage | Total percentage |
|-------------------|--------------------|------------|------------------|
| <200              | 0                  | 0.0%       | 0.0%             |
| 200-299           | 19357              | 33.9%      | 46.9%            |
| 300-399           | 7442               | 13.0%      |                  |
| 400-499           | 4571               | 8.0%       |                  |
| 500-599           | 2992               | 5.2%       | 20.5%            |
| 600-699           | 2341               | 4.1%       |                  |
| 700-799           | 1799               | 3.1%       |                  |
| 800-899           | 1419               | 2.5%       | 18.0%            |
| 900-999           | 1193               | 2.1%       |                  |
| 1000-1099         | 1001               | 1.8%       |                  |
| 1100-1199         | 893                | 1.6%       |                  |
| 1200-1299         | 815                | 1.4%       |                  |
| 1300-1399         | 804                | 1.4%       |                  |
| 1400-1499         | 710                | 1.2%       |                  |
| 1500-1599         | 681                | 1.2%       |                  |
| 1600-1699         | 760                | 1.3%       |                  |
| 1700-1799         | 692                | 1.2%       |                  |
| 1800-1899         | 648                | 1.1%       |                  |
| 1900-1999         | 642                | 1.1%       |                  |
| 2000-2099         | 549                | 1.0%       | 8.0%             |
| 2100-2199         | 586                | 1.0%       |                  |
| 2200-2299         | 546                | 1.0%       |                  |
| 2300-2399         | 498                | 0.9%       |                  |
| 2400-2499         | 498                | 0.9%       |                  |
| 2500-2599         | 435                | 0.8%       |                  |
| 2600-2699         | 401                | 0.7%       |                  |
| 2700-2799         | 345                | 0.6%       |                  |

|           |      |      |      |
|-----------|------|------|------|
| 2800-2899 | 346  | 0.6% |      |
| 2900-2999 | 345  | 0.6% |      |
| ≥3000     | 3810 | 6.7% | 6.7% |
