# Supplementary material for: Identification of Candidate Genes Associated with Pulp Color by Transcriptomic Analysis of ‘Huaxiu’ Plum (Prunus salicina Lindl.) during Fruit-Ripening
Source: MDPI journal article supplement (doi:10.3390/cimb44120434), 2022-12-15
Supplement: s1 [file s1]

**Table S2.** Summary of read numbers based on the RNA-Seq data from the pulp of 'Huaxiu' pump during the yellow, orange and red stages of maturation

| Summary                     | Yellow     |            |            | Orange     |            |            | Red        |            |            |
|-----------------------------|------------|------------|------------|------------|------------|------------|------------|------------|------------|
|                             | YS-1       | YS-2       | Mean       | OS-1       | OS-2       | Mean       | RS-1       | RS-2       | Mean       |
| All Reads Num               | 55840988   | 56197522   | 56019255   | 59505786   | 56917878   | 58211832   | 59849866   | 52122114   | 55985990   |
| GC Percentage               | 45.92%     | 45.81%     | 45.87%     | 45.68%     | 45.8%      | 45.74%     | 46%        | 45.98%     | 45.99%     |
| Bases after Filter          | 8351322365 | 8410146219 | 8380734292 | 8907146341 | 8519420880 | 8713283611 | 8956546472 | 7802125530 | 8379336001 |
| Q20 Percentage              | 97.26%     | 97.06%     | 97.16%     | 97.03%     | 97.23%     | 97.13%     | 96.97%     | 97.34%     | 97.16%     |
| Q30 Percentage              | 92.94%     | 92.50%     | 92.72%     | 92.41%     | 92.85%     | 92.63%     | 92.28%     | 93.07%     | 92.68%     |
| Total mapped reads          | 49002007   | 49331284   | 49536759   | 52309871   | 49665744   | 514078879  | 52831026   | 45992106   | 49679550   |
| Total mapped reads Ratio    | 88.45 %    | 88.41 %    | 88.43%     | 88.42 %    | 88.20 %    | 88.31%     | 88.79 %    | 88.67 %    | 88.74%     |
| Unique Mapped Reads         | 47141180   | 47503820   | 47322500   | 50106969   | 47586762   | 48846865.5 | 50375983   | 43822669   | 47099326   |
| Unique Mapped Reads Ratio   | 85.09%     | 85.13%     | 85.11%     | 84.70%     | 84.51%     | 84.60%     | 84.67%     | 84.49%     | 84.58%     |
| Multiple Mapped Reads       | 1860827    | 1827464    | 1844146    | 2202902    | 2078982    | 2140942    | 2455043    | 2169437    | 2312240    |
| Multiple Mapped Reads Ratio | 3.36%      | 3.27%      | 3.32%      | 3.72%      | 3.69%      | 3.71%      | 4.13%      | 4.18%      | 4.15%      |
| Unmapped Reads              | 6398959    | 6469166    | 6434063    | 6850255    | 6646438    | 6748347    | 6667962    | 5876880    | 6272421    |
| Unmapped Reads Ratio        | 11.55%     | 11.59%     | 11.57%     | 11.58%     | 11.80%     | 11.69%     | 11.21%     | 11.33%     | 11.26%     |

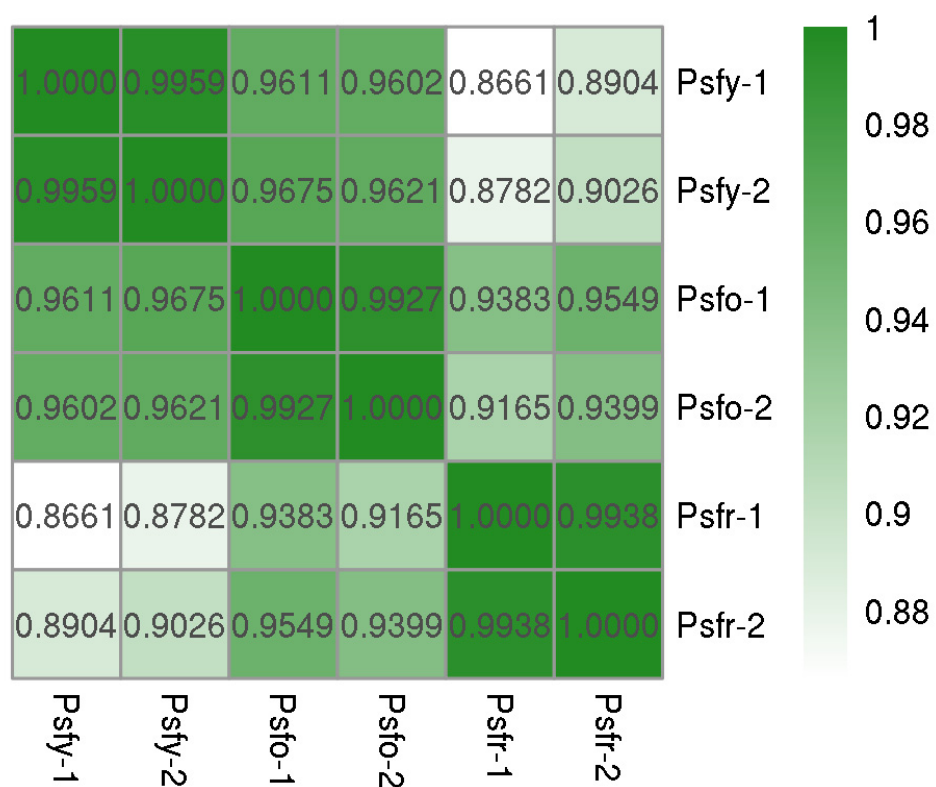

The correlation analysis of RNA-Seq data of 'Huaxiu' pump during the yellow, orange and red stages.

Psfy: yellow stage (YS); Psfo: orange stage (OS); Psfr: Red stage (RS).
