# Supplementary material for: Identification of Candidate Genes Associated with Pulp Color by Transcriptomic Analysis of ‘Huaxiu’ Plum (Prunus salicina Lindl.) during Fruit-Ripening
Source: MDPI journal article supplement (doi:10.3390/cimb44120434), 2022-12-15
Supplement: s1 [file s1]

**Table S4.** Summary of functional annotations for the assembled unigenes

| Database         | Number of annotated unigenes | Percentage of annotated unigenes (%) |
|------------------|------------------------------|--------------------------------------|
| Total Unigenes   | 57119                        |                                      |
| Nr               | 32185                        | 56.3%                                |
| Swissprot        | 25299                        | 44.3%                                |
| KOG              | 19121                        | 33.5%                                |
| KEGG             | 13143                        | 23.0%                                |
| Annotation genes | 35181                        | 61.6%                                |
