# Supplementary material for: Identification of Candidate Genes Associated with Pulp Color by Transcriptomic Analysis of ‘Huaxiu’ Plum (Prunus salicina Lindl.) during Fruit-Ripening
Source: MDPI journal article supplement (doi:10.3390/cimb44120434), 2022-12-15
Supplement: s1 [file s1]

**Table S5.** The species distribution of unigene BLAST results against the nr database

| Species                        | Unigene Num | Percentage |
|--------------------------------|-------------|------------|
| <i>Prunus mume</i>             | 17692       | 55.0%      |
| <i>Malus domestica</i>         | 1547        | 4.8%       |
| <i>Prunus persica</i>          | 1087        | 3.4%       |
| <i>Pyrus x bretschneideri</i>  | 1007        | 3.1%       |
| <i>Theobroma cacao</i>         | 964         | 3.0%       |
| <i>Medicago truncatula</i>     | 689         | 2.1%       |
| <i>Brassica napus</i>          | 588         | 1.8%       |
| <i>Oryza sativa Japonica</i>   | 498         | 1.5%       |
| <i>Fragaria vesca</i>          | 483         | 1.5%       |
| <i>Gossypium arboreum</i>      | 348         | 1.1%       |
| <i>Cajanus cajan</i>           | 346         | 1.1%       |
| <i>Ziziphus jujuba</i>         | 283         | 0.9%       |
| <i>Morus notabilis</i>         | 264         | 0.8%       |
| <i>Vitis vinifera</i>          | 264         | 0.8%       |
| <i>Ricinus communis</i>        | 252         | 0.8%       |
| <i>Arabidopsis thaliana</i>    | 239         | 0.7%       |
| <i>Doroceras hygrometricum</i> | 222         | 0.7%       |
| <i>Populus trichocarpa</i>     | 199         | 0.6%       |
| <i>Cynara cardunculus</i>      | 142         | 0.4%       |
| <i>Oryza sativa Indica</i>     | 140         | 0.4%       |
| other                          | 4931        | 15.3%      |
