# Supplementary material for: Identification of Candidate Genes Associated with Pulp Color by Transcriptomic Analysis of ‘Huaxiu’ Plum (Prunus salicina Lindl.) during Fruit-Ripening
Source: MDPI journal article supplement (doi:10.3390/cimb44120434), 2022-12-15
Supplement: s1 [file s1]

**Table S12-1. Pathway Enrichment in YS-vs-OS (top 20).**

|    | KEGG Pathway                                             | Up genes of<br>DEGs (137) | Down genes of<br>DEGs (81) | All DEGs genes<br>with pathway (218) | Percentage | P-value  |
|----|----------------------------------------------------------|---------------------------|----------------------------|--------------------------------------|------------|----------|
| 1  | Phenylpropanoid biosynthesis                             | 12                        | 6                          | 18                                   | 8.26%      | 0.000004 |
| 2  | Starch and sucrose metabolism                            | 16                        | 5                          | 21                                   | 9.63%      | 0.000074 |
| 3  | Pentose and glucuronate interconversions                 | 8                         | 4                          | 12                                   | 5.50%      | 0.000135 |
| 4  | Diterpenoid biosynthesis                                 | 1                         | 4                          | 5                                    | 2.29%      | 0.001066 |
| 5  | Flavonoid biosynthesis                                   | 5                         | 1                          | 6                                    | 2.75%      | 0.001480 |
| 6  | Amino sugar and nucleotide sugar metabolism              | 9                         | 3                          | 12                                   | 5.50%      | 0.007148 |
| 7  | Plant hormone signal transduction                        | 6                         | 8                          | 14                                   | 6.42%      | 0.011492 |
| 8  | Glutathione metabolism                                   | 9                         | -                          | 9                                    | 4.13%      | 0.012867 |
| 9  | Ether lipid metabolism                                   | 3                         | -                          | 3                                    | 1.38%      | 0.041111 |
| 10 | Plant-pathogen interaction                               | 7                         | 8                          | 15                                   | 6.88%      | 0.043659 |
| 11 | Fatty acid elongation                                    | 2                         | 1                          | 3                                    | 1.38%      | 0.053629 |
| 12 | Isoquinoline alkaloid biosynthesis                       | 2                         | 1                          | 3                                    | 1.38%      | 0.062872 |
| 13 | Brassinosteroid biosynthesis                             | 3                         | -                          | 3                                    | 1.38%      | 0.083378 |
| 14 | Cutin, suberine and wax biosynthesis                     | 2                         | -                          | 2                                    | 0.92%      | 0.111183 |
| 15 | Endocytosis                                              | 5                         | 5                          | 10                                   | 4.59%      | 0.135490 |
| 16 | Sesquiterpenoid and triterpenoid biosynthesis            | 2                         | -                          | 2                                    | 0.92%      | 0.150145 |
| 17 | Phenylalanine metabolism                                 | 3                         | 1                          | 4                                    | 1.83%      | 0.157101 |
| 18 | Linoleic acid metabolism                                 | 1                         | 1                          | 2                                    | 0.92%      | 0.160271 |
| 19 | Monoterpenoid biosynthesis                               | 1                         | 1                          | 2                                    | 0.92%      | 0.180870 |
| 20 | Stilbenoid, diarylheptanoid and gingerol<br>biosynthesis | 1                         | 1                          | 2                                    | 0.92%      | 0.191314 |

**Table S12-2. Pathway Enrichment in OS-vs-RS (top 20).**

|    | KEGG Pathway                                              | Up genes of<br>DEGs (138) | Down genes of<br>DEGs (442) | All DEGs genes with<br>pathway (580) | Percentage | P-value  |
|----|-----------------------------------------------------------|---------------------------|-----------------------------|--------------------------------------|------------|----------|
| 1  | Starch and sucrose metabolism                             | 12                        | 39                          | 51                                   | 8.79%      | 0.000000 |
| 2  | Plant hormone signal transduction                         | 10                        | 29                          | 39                                   | 6.72%      | 0.000009 |
| 3  | Plant-pathogen interaction                                | 5                         | 40                          | 45                                   | 7.76%      | 0.000046 |
| 4  | Flavonoid biosynthesis                                    | 8                         | 4                           | 12                                   | 2.07%      | 0.000076 |
| 5  | Phenylpropanoid biosynthesis                              | 6                         | 23                          | 29                                   | 5.00%      | 0.000098 |
| 6  | Fatty acid elongation                                     | 6                         | 2                           | 8                                    | 1.38%      | 0.001427 |
| 7  | Taurine and hypotaurine metabolism                        | 4                         | 2                           | 6                                    | 1.03%      | 0.001619 |
| 8  | Isoquinoline alkaloid biosynthesis                        |                           | 8                           | 8                                    | 1.38%      | 0.002239 |
| 9  | Cyanoamino acid metabolism                                | 1                         | 12                          | 13                                   | 2.24%      | 0.002810 |
| 10 | Ether lipid metabolism                                    | 1                         | 6                           | 7                                    | 1.21%      | 0.003363 |
| 11 | Pentose and glucuronate interconversions                  | 8                         | 10                          | 18                                   | 3.10%      | 0.003465 |
| 12 | Diterpenoid biosynthesis                                  | 5                         | 2                           | 7                                    | 1.21%      | 0.004195 |
| 13 | Tropane, piperidine and pyridine alkaloid<br>biosynthesis | -                         | 7                           | 7                                    | 1.21%      | 0.009140 |
| 14 | Glutathione metabolism                                    | 3                         | 15                          | 18                                   | 3.10%      | 0.010384 |
| 15 | Zeatin biosynthesis                                       | 1                         | 2                           | 3                                    | 0.52%      | 0.018553 |
| 16 | Galactose metabolism                                      | 2                         | 11                          | 13                                   | 2.24%      | 0.025711 |
| 17 | Amino sugar and nucleotide sugar<br>metabolism            | 3                         | 19                          | 22                                   | 3.79%      | 0.025903 |
| 18 | alpha-Linolenic acid metabolism                           | 6                         | 5                           | 11                                   | 1.90%      | 0.033814 |
| 19 | Linoleic acid metabolism                                  | 1                         | 4                           | 5                                    | 0.86%      | 0.037799 |
| 20 | Brassinosteroid biosynthesis                              | 1                         | 5                           | 6                                    | 1.03%      | 0.052866 |

**Table S12-3. Pathway Enrichment in YS-vs-RS (top 20).**

|    | KEGG Pathway                                           | Up genes of<br>DEGs (208) | Down genes of<br>DEGs (542) | All DEGs genes<br>with pathway (750) | Percentage | P-value  |
|----|--------------------------------------------------------|---------------------------|-----------------------------|--------------------------------------|------------|----------|
| 1  | Starch and sucrose metabolism                          | 20                        | 52                          | 72                                   | 9.6%       | 0.000000 |
| 2  | Plant hormone signal transduction                      | 16                        | 39                          | 55                                   | 7.3%       | 0.000000 |
| 3  | Plant-pathogen interaction                             | 8                         | 54                          | 62                                   | 8.3%       | 0.000000 |
| 4  | Flavonoid biosynthesis                                 | 10                        | 7                           | 17                                   | 2.3%       | 0.000000 |
| 5  | Pentose and glucuronate interconversions               | 13                        | 16                          | 29                                   | 3.9%       | 0.000003 |
| 6  | Phenylpropanoid biosynthesis                           | 12                        | 25                          | 37                                   | 4.9%       | 0.000012 |
| 7  | Taurine and hypotaurine metabolism                     | 5                         | 3                           | 8                                    | 1.1%       | 0.000155 |
| 8  | Galactose metabolism                                   | 2                         | 17                          | 19                                   | 2.5%       | 0.001801 |
| 9  | Fatty acid elongation                                  | 7                         | 2                           | 9                                    | 1.2%       | 0.001806 |
| 10 | Glutathione metabolism                                 | 8                         | 14                          | 22                                   | 2.9%       | 0.008852 |
| 11 | Isoquinoline alkaloid biosynthesis                     | -                         | 8                           | 8                                    | 1.1%       | 0.010704 |
| 12 | Ether lipid metabolism                                 | 1                         | 6                           | 7                                    | 0.9%       | 0.013582 |
| 13 | Stilbenoid, diarylheptanoid and gingerol biosynthesis  | -                         | 7                           | 7                                    | 0.9%       | 0.016608 |
| 14 | alpha-Linolenic acid metabolism                        | 7                         | 7                           | 14                                   | 1.9%       | 0.019296 |
| 15 | Cyanoamino acid metabolism                             | 2                         | 11                          | 13                                   | 1.7%       | 0.022590 |
| 16 | Phenylalanine metabolism                               | 3                         | 10                          | 13                                   | 1.7%       | 0.025095 |
| 17 | Photosynthesis                                         | 1                         | 20                          | 21                                   | 2.8%       | 0.025263 |
| 18 | Tyrosine metabolism                                    | 2                         | 11                          | 13                                   | 1.7%       | 0.030711 |
| 19 | Linoleic acid metabolism                               | 2                         | 4                           | 6                                    | 0.8%       | 0.031397 |
| 20 | Tropane, piperidine and pyridine alkaloid biosynthesis | -                         | 7                           | 7                                    | 0.9%       | 0.033461 |

Note: -.The pathway was not significant
