# Supplementary material for: Identification of Candidate Genes Associated with Pulp Color by Transcriptomic Analysis of ‘Huaxiu’ Plum (Prunus salicina Lindl.) during Fruit-Ripening
Source: MDPI journal article supplement (doi:10.3390/cimb44120434), 2022-12-15
Supplement: s1 [file s1]

**Table S1.** Primer sequences of unigenes used for quantitative RT-PCR verification

| Unigene name            | Forward primer             | Reverse primer              |
|-------------------------|----------------------------|-----------------------------|
| Unigene0001957 (CHS)    | AGCAGCCCAAACCATCCTTCC      | GCAATCCAGAATAGTGAGTTCCAATCC |
| Unigene0043265 (CHS)    | ACATTGAATTTGAGGTGGGTTAGGTC | CCAGTGGCAAGGCAATACGC        |
| Unigene0026465 (CHI)    | AACAAATACATCTCCATCGCCACAC  | TCCTCCAAGTACACGCCAATCG      |
| Unigene0012798 (DFR)    | AAATTGAACAAGCAAGCAGTCCATAC | CTCGTCCGCCAGGTCAGC          |
| Unigene0001105 (LDOX)   | GTTGTGGAGTATGAAGGTGAGTGC   | TTGGGTTGGGATTGGAAGAAGGG     |
| Unigene0002347 (F3'H)   | AAAGTGATGGAGGTGGAGAGAGTG   | CCGTGGTCAGTAATGAGAAAGAAGC   |
| Unigene0040558 (F3H)    | GAGCATCAGAGAGGGAGAGAAGC    | CCAGTAGCATAACACGAGCAAGC     |
| Unigene0027142 (F3'H)   | AGGAGATGGTTGTGGAGATGATGG   | GCCGCTGCTCTTCTTGTGTTC       |
| Unigene0022847 (F3'5'H) | GTTGATGAAGGGCTGTTGCTCTC    | AAGGCATCCGACTGAAAGAAGTTAATC |
| Unigene0025372          | GCCGATGTTCTCCCACCCTTG      | GCCGATGTTCTCCCACCCTTG       |
| Unigene0039941          | GTTCCCGCCCTATCACATACCC     | AAGAGCACTCCCTCCGCATTG       |
| Unigene0002731          | GGCGGAGAAGGTGACAGTGAG      | CTTGCTGAGGGCTTGCTTGAG       |
| <i>Actin</i>            | AACTGGGATGACATGGAGAAGATC   | AATGGCATGAGGTAGGGCATAA      |
