# Supplementary material for: Identification of Candidate Genes Associated with Pulp Color by Transcriptomic Analysis of ‘Huaxiu’ Plum (Prunus salicina Lindl.) during Fruit-Ripening
Source: Curr Issues Mol Biol. 2022 Dec 15;44(12):6368–84. doi: 10.3390/cimb44120434 (PMC9776821; doi:10.3390/cimb44120434)
Supplement: Supplementary file 1 [file cimb-44-00434-s001.zip]

Archive with 15 entries (15 files):
- Figure S1.jpg
- Figure S2.jpg
- Figure S3.jpg
- Table S1.pdf
- Table S10.xlsx
- Table S11.xlsx
- Table S12.pdf
- Table S2.pdf
- Table S3.pdf
- Table S4.pdf
- Table S5 .pdf
- Table S6.xlsx
- Table S7.xlsx
- Table S8.pdf
- Table S9.xlsx
