# Supplementary material for: Identification of Candidate Genes Associated with Pulp Color by Transcriptomic Analysis of ‘Huaxiu’ Plum (Prunus salicina Lindl.) during Fruit-Ripening
Source: Curr Issues Mol Biol. 2022 Dec 15;44(12):6368–84. doi: 10.3390/cimb44120434 (PMC9776821; doi:10.3390/cimb44120434)
Supplement: Supplementary file 1 [file cimb-44-00434-s001.zip › Table S6.xlsx]

## Sheet: Prunus_salicina-Unigene.fa.GO2g
Ontology	Class	number of Unigene
Biological Process	reproduction	877	21438
	cell killing	3
	immune system process	242
	metabolic process	12176
	cellular process	11287
	reproductive process	869
	biological adhesion	69
	signaling	918
	multicellular organismal process	1117
	developmental process	1694
	growth	178
	locomotion	9
	single-organism process	8730
	rhythmic process	37
	response to stimulus	3287
	localization	2959
	multi-organism process	499
	biological regulation	4381
	cellular component organization or biogenesis	2454
	detoxification	10
Molecular Function	transcription factor activity, protein binding	67
	nucleic acid binding transcription factor activity	636
	catalytic activity	10764
	signal transducer activity	123
	structural molecule activity	590
	transporter activity	967
	binding	11852
	electron carrier activity	39
	antioxidant activity	159
	translation regulator activity	1
	molecular transducer activity	124
	molecular function regulator	181
Cellular Component	extracellular region	265
	cell	8896
	nucleoid	12
	membrane	4084
	virion	65
	cell junction	378
	extracellular matrix	5
	membrane-enclosed lumen	142
	macromolecular complex	2136
	organelle	7031
	extracellular region part	9
	organelle part	2851
	virion part	65
	membrane part	2979
	cell part	8895
	supramolecular fiber	5

## Sheet: Sheet1
Table S6. Summary of level2 GO term classification for the 'Huaxiu' plums (Prunus salicina Lindl.) transcriptome
Ontology	Class	number of Unigene
Biological Process	reproduction	877
	cell killing	3
	immune system process	242
	metabolic process	12176
	cellular process	11287
	reproductive process	869
	biological adhesion	69
	signaling	918
	multicellular organismal process	1117
	developmental process	1694
	growth	178
	locomotion	9
	single-organism process	8730
	rhythmic process	37
	response to stimulus	3287
	localization	2959
	multi-organism process	499
	biological regulation	4381
	cellular component organization or biogenesis	2454
	detoxification	10
Molecular Function	transcription factor activity, protein binding	67
	nucleic acid binding transcription factor activity	636
	catalytic activity	10764
	signal transducer activity	123
	structural molecule activity	590
	transporter activity	967
	binding	11852
	electron carrier activity	39
	antioxidant activity	159
	translation regulator activity	1
	molecular transducer activity	124
	molecular function regulator	181
Cellular Component	extracellular region	265
	cell	8896
	nucleoid	12
	membrane	4084
	virion	65
	cell junction	378
	extracellular matrix	5
	membrane-enclosed lumen	142
	macromolecular complex	2136
	organelle	7031
	extracellular region part	9
	organelle part	2851
	virion part	65
	membrane part	2979
	cell part	8895
	supramolecular fiber	5
