# Supplementary material for: Identification of Candidate Genes Associated with Pulp Color by Transcriptomic Analysis of ‘Huaxiu’ Plum (Prunus salicina Lindl.) during Fruit-Ripening
Source: Curr Issues Mol Biol. 2022 Dec 15;44(12):6368–84. doi: 10.3390/cimb44120434 (PMC9776821; doi:10.3390/cimb44120434)
Supplement: Supplementary file 1 [file cimb-44-00434-s001.zip › Table S7.xlsx]

## Sheet: kog.class.annot
Code	Functional-Categories	Gene-Number	Percentage	Genes
A	RNA processing and modification	1841	0.057	Unigene0000070,KOG0285	Unigene0000085,KOG0107	Unigene0000085,KOG0106	Unigene0000085,KOG0105	Unigene0000113,KOG2098	Unigene0000138,KOG3408	Unigene0000172,KOG0701	Unigene0000227,KOG0923	Unigene0000228,KOG0923	Unigene0000228,KOG0922	Unigene0000228,KOG0924	Unigene0000229,KOG0923	Unigene0003258,KOG4768	Unigene0003285,KOG0265	Unigene0003317,KOG2184	Unigene0003317,KOG2185	Unigene0003318,KOG2184	Unigene0003319,KOG2184	Unigene0003357,KOG4207	Unigene0003389,KOG0123	Unigene0003389,KOG0148	Unigene0040964,KOG0285	Unigene0041022,KOG0839	Unigene0041108,KOG4205	Unigene0041119,KOG3408	Unigene0041124,KOG3117	Unigene0041125,KOG3117	Unigene0041193,KOG0948	Unigene0041193,KOG0947	Unigene0041193,KOG0952	Unigene0041250,KOG2190	Unigene0041250,KOG2193	Unigene0041258,KOG4205	Unigene0041261,KOG1847	Unigene0041261,KOG0007	Unigene0041322,KOG1802	Unigene0041322,KOG1801	Unigene0041331,KOG0947	Unigene0041331,KOG0948	Unigene0041332,KOG0947	Unigene0041333,KOG0947	Unigene0041396,KOG1190	Unigene0041396,KOG1456	Unigene0041414,KOG2044	Unigene0041554,KOG0796	Unigene0041581,KOG0701
B	Chromatin structure and dynamics	419	0.013	Unigene0000063,KOG1344	Unigene0000063,KOG1342	Unigene0000063,KOG1343	Unigene0000208,KOG4012	Unigene0000288,KOG1245	Unigene0003191,KOG2570	Unigene0003614,KOG4161	Unigene0040990,KOG0389	Unigene0040993,KOG2130	Unigene0040993,KOG2131	Unigene0040996,KOG1080	Unigene0041072,KOG0386	Unigene0041124,KOG3118	Unigene0041186,KOG1342	Unigene0041241,KOG1080	Unigene0041242,KOG1080	Unigene0041299,KOG1343	Unigene0041326,KOG1343	Unigene0041327,KOG1343	Unigene0041371,KOG1279	Unigene0041733,KOG4012	Unigene0042440,KOG1020	Unigene0042492,KOG4204	Unigene0042796,KOG1245	Unigene0042971,KOG1063	Unigene0042977,KOG0273	Unigene0042978,KOG0273	Unigene0043285,KOG1080	Unigene0043577,KOG1080	Unigene0043612,KOG0273	Unigene0043770,KOG1343	Unigene0043915,KOG0457	Unigene0043916,KOG0457	Unigene0043916,KOG1279	Unigene0043917,KOG0457	Unigene0003888,KOG1744	Unigene0044179,KOG1082	Unigene0044580,KOG3467	Unigene0044811,KOG0892	Unigene0044811,KOG0890	Unigene0045599,KOG4012	Unigene0046624,KOG2441	Unigene0046694,KOG0414	Unigene0046989,KOG1744	Unigene0046990,KOG4204	Unigene0047553,KOG0457
C	Energy production and conversion	1421	0.044	Unigene0000025,KOG1192	Unigene0000114,KOG0134	Unigene0000115,KOG0134	Unigene0000164,KOG2536	Unigene0000177,KOG1198	Unigene0003210,KOG2415	Unigene0003262,KOG1192	Unigene0003303,KOG2415	Unigene0003425,KOG1198	Unigene0003425,KOG1197	Unigene0003425,KOG0025	Unigene0003514,KOG1575	Unigene0041024,KOG0537	Unigene0041025,KOG0537	Unigene0041114,KOG2614	Unigene0041206,KOG0769	Unigene0041206,KOG0752	Unigene0041206,KOG0757	Unigene0041236,KOG2614	Unigene0041237,KOG2614	Unigene0041262,KOG1575	Unigene0041262,KOG1576	Unigene0041345,KOG2620	Unigene0041590,KOG0752	Unigene0041591,KOG0752	Unigene0041763,KOG0369	Unigene0041834,KOG4769	Unigene0041834,KOG4664	Unigene0041991,KOG1575	Unigene0041992,KOG1575	Unigene0042043,KOG0134	Unigene0042096,KOG1672	Unigene0042097,KOG1672	Unigene0042099,KOG1672	Unigene0042162,KOG2495	Unigene0042241,KOG4668	Unigene0042242,KOG4668	Unigene0042243,KOG4770	Unigene0042282,KOG2453	Unigene0042283,KOG2453	Unigene0042283,KOG2450	Unigene0042283,KOG2451	Unigene0042284,KOG2453	Unigene0042285,KOG2453	Unigene0042286,KOG2453	Unigene0042352,KOG4663
D	Cell cycle control, cell division, chromosome partitioning	766	0.024	Unigene0000094,KOG2496	Unigene0000288,KOG2043	Unigene0000309,KOG0005	Unigene0003285,KOG0267	Unigene0003374,KOG2186	Unigene0003457,KOG0600	Unigene0003597,KOG1126	Unigene0003597,KOG1155	Unigene0041039,KOG0588	Unigene0041092,KOG0654	Unigene0041092,KOG0653	Unigene0041093,KOG0654	Unigene0041111,KOG0082	Unigene0041187,KOG1849	Unigene0041414,KOG2045	Unigene0041514,KOG0267	Unigene0041632,KOG1987	Unigene0041735,KOG0440	Unigene0041737,KOG0440	Unigene0041737,KOG1903	Unigene0041827,KOG2277	Unigene0042116,KOG2045	Unigene0042295,KOG0267	Unigene0042408,KOG2513	Unigene0042421,KOG0987	Unigene0042422,KOG0987	Unigene0042424,KOG0987	Unigene0042440,KOG1020	Unigene0042478,KOG2186	Unigene0042484,KOG4640	Unigene0042583,KOG2398	Unigene0042721,KOG1166	Unigene0042725,KOG1166	Unigene0042751,KOG1525	Unigene0042752,KOG1525	Unigene0042924,KOG1938	Unigene0042948,KOG0005	Unigene0042977,KOG0267	Unigene0042981,KOG0834	Unigene0043048,KOG0656	Unigene0043048,KOG0653	Unigene0043048,KOG0654	Unigene0043049,KOG0656	Unigene0043049,KOG0653	Unigene0043049,KOG0654	Unigene0043050,KOG0656
E	Amino acid transport and metabolism	1164	0.036	Unigene0000062,KOG3627	Unigene0000080,KOG2786	Unigene0000131,KOG1592	Unigene0000131,KOG1593	Unigene0000169,KOG1252	Unigene0000169,KOG1481	Unigene0000194,KOG1368	Unigene0000235,KOG1287	Unigene0000235,KOG1286	Unigene0000304,KOG1282	Unigene0000305,KOG1052	Unigene0003286,KOG2964	Unigene0003369,KOG1184	Unigene0003378,KOG1402	Unigene0003510,KOG0638	Unigene0003518,KOG0571	Unigene0003524,KOG1046	Unigene0041232,KOG1383	Unigene0041233,KOG1383	Unigene0041255,KOG1303	Unigene0041350,KOG1549	Unigene0041370,KOG1404	Unigene0041370,KOG1401	Unigene0041370,KOG1402	Unigene0041431,KOG1282	Unigene0041443,KOG1223	Unigene0041443,KOG0026	Unigene0041489,KOG1441	Unigene0041531,KOG2367	Unigene0041539,KOG2367	Unigene0041545,KOG1303	Unigene0041596,KOG1304	Unigene0041639,KOG3143	Unigene0041649,KOG1562	Unigene0041712,KOG1289	Unigene0041719,KOG1237	Unigene0041763,KOG0238	Unigene0041884,KOG1303	Unigene0041885,KOG1303	Unigene0041895,KOG0975	Unigene0041896,KOG0975	Unigene0041979,KOG0455	Unigene0041979,KOG0456	Unigene0042234,KOG1046	Unigene0042324,KOG0633	Unigene0042326,KOG0633
F	Nucleotide transport and metabolism	301	0.009	Unigene0000020,KOG1907	Unigene0000021,KOG1907	Unigene0000022,KOG1907	Unigene0000052,KOG2938	Unigene0000278,KOG3125	Unigene0041008,KOG3347	Unigene0041009,KOG3347	Unigene0041321,KOG1018	Unigene0041356,KOG1436	Unigene0041490,KOG2584	Unigene0041491,KOG2584	Unigene0041492,KOG2584	Unigene0041542,KOG2387	Unigene0041582,KOG1479	Unigene0042037,KOG1528	Unigene0042296,KOG1528	Unigene0042346,KOG0430	Unigene0042504,KOG2387	Unigene0042780,KOG2452	Unigene0042864,KOG1800	Unigene0042958,KOG0036	Unigene0042959,KOG0036	Unigene0042974,KOG2387	Unigene0042975,KOG2387	Unigene0042976,KOG2387	Unigene0043136,KOG1292	Unigene0044835,KOG1907	Unigene0044836,KOG1907	Unigene0044837,KOG1907	Unigene0045384,KOG1448	Unigene0045566,KOG2452	Unigene0045578,KOG0888	Unigene0046364,KOG3078	Unigene0046364,KOG3079	Unigene0046585,KOG1097	Unigene0046603,KOG2452	Unigene0047031,KOG1448	Unigene0047031,KOG1503	Unigene0047171,KOG3985	Unigene0047201,KOG0430	Unigene0047325,KOG2555	Unigene0047332,KOG2702	Unigene0047627,KOG2835	Unigene0047733,KOG1377	Unigene0047867,KOG2835	Unigene0047980,KOG0833
G	Carbohydrate transport and metabolism	1314	0.041	Unigene0000002,KOG2099	Unigene0000025,KOG1192	Unigene0000144,KOG0223	Unigene0000195,KOG0626	Unigene0000246,KOG0223	Unigene0003232,KOG0496	Unigene0003262,KOG1192	Unigene0003285,KOG2254	Unigene0003295,KOG2531	Unigene0003366,KOG2440	Unigene0003505,KOG3765	Unigene0003528,KOG0626	Unigene0003597,KOG4626	Unigene0003607,KOG1203	Unigene0040956,KOG1021	Unigene0040966,KOG0235	Unigene0040993,KOG0471	Unigene0041054,KOG0602	Unigene0041086,KOG1367	Unigene0041181,KOG1958	Unigene0041181,KOG1959	Unigene0041195,KOG0223	Unigene0041390,KOG2446	Unigene0041489,KOG1441	Unigene0041667,KOG2772	Unigene0041730,KOG3974	Unigene0041916,KOG0496	Unigene0041917,KOG0496	Unigene0041995,KOG0657	Unigene0041996,KOG0657	Unigene0041997,KOG0657	Unigene0042032,KOG4626	Unigene0042037,KOG2951	Unigene0042041,KOG1429	Unigene0042041,KOG0747	Unigene0042239,KOG2204	Unigene0042242,KOG0449	Unigene0042425,KOG2024	Unigene0042429,KOG0569	Unigene0042530,KOG1959	Unigene0042530,KOG1958	Unigene0042616,KOG4153	Unigene0042617,KOG4153	Unigene0042644,KOG2951	Unigene0042645,KOG2951	Unigene0042726,KOG2788
H	Coenzyme transport and metabolism	278	0.009	Unigene0003228,KOG1276	Unigene0003228,KOG0685	Unigene0003369,KOG1184	Unigene0040971,KOG2303	Unigene0041775,KOG1527	Unigene0041780,KOG1527	Unigene0041959,KOG2525	Unigene0042879,KOG3199	Unigene0043217,KOG0685	Unigene0043752,KOG4254	Unigene0043760,KOG1370	Unigene0003734,KOG2017	Unigene0003748,KOG0945	Unigene0044338,KOG1381	Unigene0044340,KOG1381	Unigene0044368,KOG3110	Unigene0044371,KOG3110	Unigene0044728,KOG3159	Unigene0045016,KOG0711	Unigene0045133,KOG1184	Unigene0045585,KOG3855	Unigene0045654,KOG3093	Unigene0046301,KOG2743	Unigene0047126,KOG1527	Unigene0047221,KOG1506	Unigene0047332,KOG2702	Unigene0047495,KOG2900	Unigene0047631,KOG1184	Unigene0047953,KOG1559	Unigene0048122,KOG1284	Unigene0048131,KOG3855	Unigene0048641,KOG1360	Unigene0048727,KOG2743	Unigene0049552,KOG4166	Unigene0049552,KOG1185	Unigene0049552,KOG1184	Unigene0049796,KOG4230	Unigene0049988,KOG3159	Unigene0050611,KOG1360	Unigene0051004,KOG1527	Unigene0051488,KOG2525	Unigene0052181,KOG2790	Unigene0052351,KOG1506	Unigene0052861,KOG1360	Unigene0053315,KOG1506	Unigene0053392,KOG2598
I	Lipid transport and metabolism	1114	0.035	Unigene0000065,KOG1256	Unigene0000065,KOG1180	Unigene0000322,KOG1176	Unigene0000348,KOG4720	Unigene0003350,KOG4569	Unigene0003353,KOG2345	Unigene0003390,KOG4178	Unigene0003533,KOG2088	Unigene0003582,KOG2088	Unigene0041231,KOG1329	Unigene0041263,KOG0497	Unigene0041292,KOG0059	Unigene0041293,KOG0059	Unigene0041294,KOG0059	Unigene0041400,KOG4666	Unigene0041400,KOG2898	Unigene0041406,KOG1180	Unigene0041406,KOG1256	Unigene0041451,KOG0497	Unigene0041452,KOG0497	Unigene0041560,KOG4569	Unigene0041561,KOG4569	Unigene0041599,KOG0157	Unigene0041601,KOG2369	Unigene0041602,KOG2369	Unigene0041668,KOG1684	Unigene0041668,KOG1680	Unigene0041668,KOG1682	Unigene0041668,KOG1681	Unigene0041668,KOG0016	Unigene0041669,KOG1684	Unigene0041763,KOG0238	Unigene0041763,KOG0368	Unigene0042202,KOG1256	Unigene0042202,KOG1180	Unigene0042203,KOG1256	Unigene0042246,KOG1888	Unigene0042246,KOG1889	Unigene0042246,KOG1890	Unigene0042316,KOG0157	Unigene0042327,KOG1200	Unigene0042345,KOG0157	Unigene0042372,KOG1176	Unigene0042430,KOG1455	Unigene0042444,KOG0157	Unigene0042484,KOG1116
J	Translation, ribosomal structure and biogenesis	1759	0.055	Unigene0000005,KOG1753	Unigene0000005,KOG1697	Unigene0000077,KOG1742	Unigene0000081,KOG0052	Unigene0000200,KOG2145	Unigene0000205,KOG3257	Unigene0000294,KOG1740	Unigene0000309,KOG0003	Unigene0000309,KOG0004	Unigene0000317,KOG1488	Unigene0003201,KOG0003	Unigene0003201,KOG0004	Unigene0003270,KOG0893	Unigene0003321,KOG0900	Unigene0003323,KOG2145	Unigene0003334,KOG2805	Unigene0003349,KOG2315	Unigene0003349,KOG2314	Unigene0003356,KOG3051	Unigene0003389,KOG0123	Unigene0003389,KOG0148	Unigene0003430,KOG0434	Unigene0003449,KOG3184	Unigene0003501,KOG3271	Unigene0003529,KOG3301	Unigene0040997,KOG2317	Unigene0041008,KOG0846	Unigene0041096,KOG2187	Unigene0041235,KOG1715	Unigene0041324,KOG2315	Unigene0041443,KOG1224	Unigene0041622,KOG1627	Unigene0041674,KOG0434	Unigene0041755,KOG3070	Unigene0041947,KOG0378	Unigene0041951,KOG0378	Unigene0042028,KOG1465	Unigene0042028,KOG1467	Unigene0042028,KOG1466	Unigene0042051,KOG0900	Unigene0042053,KOG0900	Unigene0042133,KOG0123	Unigene0042226,KOG1041	Unigene0042350,KOG3422	Unigene0042350,KOG0901	Unigene0042350,KOG1754
K	Transcription	1537	0.048	Unigene0000090,KOG0014	Unigene0000094,KOG2496	Unigene0000094,KOG0794	Unigene0000113,KOG2097	Unigene0000151,KOG0014	Unigene0000288,KOG2043	Unigene0000288,KOG4362	Unigene0000295,KOG4282	Unigene0000296,KOG1601	Unigene0003191,KOG1946	Unigene0003191,KOG2570	Unigene0003246,KOG1886	Unigene0003268,KOG3490	Unigene0003353,KOG2345	Unigene0003363,KOG0870	Unigene0003363,KOG0871	Unigene0003363,KOG0869	Unigene0003384,KOG1601	Unigene0003386,KOG3405	Unigene0003421,KOG0773	Unigene0003425,KOG0025	Unigene0003588,KOG1001	Unigene0003588,KOG4439	Unigene0003614,KOG4161	Unigene0040964,KOG0263	Unigene0040990,KOG0385	Unigene0040996,KOG1081	Unigene0040996,KOG1083	Unigene0040996,KOG1080	Unigene0041001,KOG1601	Unigene0041072,KOG0387	Unigene0041072,KOG0392	Unigene0041072,KOG0385	Unigene0041072,KOG0386	Unigene0041082,KOG2338	Unigene0041083,KOG2338	Unigene0041130,KOG4673	Unigene0041185,KOG1778	Unigene0041241,KOG1080	Unigene0041241,KOG1084	Unigene0041241,KOG1083	Unigene0041241,KOG1081	Unigene0041241,KOG1079	Unigene0041242,KOG1080	Unigene0041242,KOG1084	Unigene0041256,KOG1474
L	Replication, recombination and repair	843	0.026	Unigene0000033,KOG1121	Unigene0000034,KOG1121	Unigene0000094,KOG2496	Unigene0000191,KOG1990	Unigene0000288,KOG1929	Unigene0000288,KOG2043	Unigene0000288,KOG4362	Unigene0000328,KOG1990	Unigene0003193,KOG0958	Unigene0003296,KOG4585	Unigene0003401,KOG3069	Unigene0003588,KOG1001	Unigene0003588,KOG4439	Unigene0003588,KOG1002	Unigene0003588,KOG0298	Unigene0040990,KOG0388	Unigene0041031,KOG2379	Unigene0041032,KOG2379	Unigene0041034,KOG2379	Unigene0041072,KOG0387	Unigene0041072,KOG0390	Unigene0041239,KOG0442	Unigene0041240,KOG0442	Unigene0041322,KOG1806	Unigene0041322,KOG1807	Unigene0041322,KOG1803	Unigene0041414,KOG2044	Unigene0041414,KOG2045	Unigene0041544,KOG0351	Unigene0041544,KOG0352	Unigene0041702,KOG1918	Unigene0041721,KOG2248	Unigene0041773,KOG4585	Unigene0041774,KOG1897	Unigene0041827,KOG1906	Unigene0041851,KOG1121	Unigene0041975,KOG1514	Unigene0042086,KOG1803	Unigene0042089,KOG1803	Unigene0042116,KOG2044	Unigene0042116,KOG2045	Unigene0042151,KOG0351	Unigene0042151,KOG0352	Unigene0042157,KOG3014	Unigene0042159,KOG3014	Unigene0042440,KOG1020
M	Cell wall/membrane/envelope biogenesis	343	0.011	Unigene0000281,KOG4824	Unigene0000348,KOG2686	Unigene0040956,KOG1021	Unigene0041064,KOG0916	Unigene0041065,KOG0916	Unigene0041066,KOG0916	Unigene0041108,KOG4177	Unigene0041398,KOG4287	Unigene0041511,KOG0916	Unigene0041520,KOG4287	Unigene0042041,KOG1371	Unigene0042041,KOG1429	Unigene0042052,KOG0916	Unigene0042355,KOG0916	Unigene0042356,KOG0916	Unigene0042357,KOG0916	Unigene0042553,KOG1111	Unigene0042553,KOG0853	Unigene0042582,KOG1322	Unigene0042693,KOG4287	Unigene0042694,KOG4287	Unigene0042734,KOG4701	Unigene0042736,KOG1066	Unigene0042898,KOG4177	Unigene0043029,KOG0853	Unigene0043030,KOG0853	Unigene0043031,KOG0853	Unigene0043079,KOG4748	Unigene0043080,KOG4748	Unigene0043365,KOG4177	Unigene0043693,KOG1111	Unigene0043694,KOG1111	Unigene0003859,KOG4824	Unigene0003969,KOG1429	Unigene0044416,KOG4287	Unigene0044417,KOG4287	Unigene0044418,KOG4287	Unigene0044419,KOG4287	Unigene0044421,KOG4287	Unigene0044422,KOG4287	Unigene0044424,KOG4287	Unigene0045077,KOG1066	Unigene0045079,KOG1066	Unigene0045208,KOG0853	Unigene0045208,KOG1387	Unigene0045285,KOG4177
N	Cell motility	20	0.001	Unigene0042572,KOG4229	Unigene0003888,KOG4794	Unigene0045604,KOG4229	Unigene0046989,KOG4794	Unigene0047103,KOG4229	Unigene0047553,KOG4286	Unigene0049803,KOG4081	Unigene0051178,KOG4081	Unigene0056627,KOG4794	Unigene0006755,KOG4286	Unigene0006852,KOG4229	Unigene0015059,KOG4229	Unigene0015060,KOG4229	Unigene0017092,KOG4229	Unigene0023326,KOG4794	Unigene0023327,KOG4794	Unigene0026580,KOG2116	Unigene0029577,KOG4286	Unigene0030173,KOG2116	Unigene0033008,KOG4229
O	Posttranslational modification, protein turnover, chaperones	3697	0.115	Unigene0000076,KOG2921	Unigene0000093,KOG0710	Unigene0000094,KOG0710	Unigene0000097,KOG0406	Unigene0000104,KOG0019	Unigene0000104,KOG0020	Unigene0000135,KOG1867	Unigene0000156,KOG0867	Unigene0000216,KOG0724	Unigene0000282,KOG0896	Unigene0000304,KOG1282	Unigene0000309,KOG0001	Unigene0000309,KOG0005	Unigene0000323,KOG0865	Unigene0000323,KOG0880	Unigene0000323,KOG0546	Unigene0000350,KOG0356	Unigene0003185,KOG2090	Unigene0003201,KOG0001	Unigene0003224,KOG0406	Unigene0003252,KOG1769	Unigene0003264,KOG1752	Unigene0003291,KOG0720	Unigene0003291,KOG0714	Unigene0003291,KOG0716	Unigene0003291,KOG0713	Unigene0003291,KOG0715	Unigene0003291,KOG0691	Unigene0003330,KOG3268	Unigene0003377,KOG0712	Unigene0003426,KOG1815	Unigene0003447,KOG0652	Unigene0003447,KOG0726	Unigene0003447,KOG0728	Unigene0003453,KOG1366	Unigene0003524,KOG1046	Unigene0003533,KOG2088	Unigene0003548,KOG0724	Unigene0003579,KOG1339	Unigene0003582,KOG2088	Unigene0003597,KOG4626	Unigene0003597,KOG1155	Unigene0003601,KOG0724	Unigene0040951,KOG0733	Unigene0041036,KOG1339	Unigene0041039,KOG0595
P	Inorganic ion transport and metabolism	777	0.024	Unigene0000102,KOG2301	Unigene0000102,KOG2302	Unigene0000103,KOG2301	Unigene0000305,KOG1052	Unigene0000320,KOG1650	Unigene0003224,KOG1422	Unigene0003415,KOG0498	Unigene0003573,KOG3126	Unigene0003595,KOG0204	Unigene0003611,KOG2332	Unigene0041307,KOG2882	Unigene0041339,KOG0204	Unigene0041419,KOG0202	Unigene0041419,KOG0203	Unigene0041420,KOG0202	Unigene0041516,KOG2399	Unigene0041516,KOG1307	Unigene0041516,KOG1306	Unigene0041605,KOG0498	Unigene0041607,KOG0498	Unigene0041608,KOG0498	Unigene0041609,KOG0498	Unigene0041637,KOG2353	Unigene0041734,KOG1291	Unigene0042037,KOG1528	Unigene0042103,KOG2662	Unigene0042173,KOG2332	Unigene0042174,KOG2332	Unigene0042296,KOG1528	Unigene0042512,KOG0204	Unigene0042855,KOG0498	Unigene0042855,KOG0501	Unigene0042873,KOG1120	Unigene0043014,KOG2301	Unigene0043033,KOG0498	Unigene0043033,KOG0501	Unigene0043033,KOG0499	Unigene0043033,KOG0500	Unigene0043238,KOG2662	Unigene0043238,KOG0498	Unigene0043239,KOG3386	Unigene0043327,KOG1052	Unigene0043355,KOG0204	Unigene0043420,KOG0204	Unigene0043509,KOG0498	Unigene0043530,KOG0236
Q	Secondary metabolites biosynthesis, transport and catabolism	960	0.03	Unigene0000098,KOG0143	Unigene0000112,KOG0054	Unigene0000148,KOG0156	Unigene0000153,KOG0022	Unigene0000280,KOG0156	Unigene0000353,KOG0156	Unigene0003228,KOG0029	Unigene0003370,KOG0065	Unigene0003420,KOG0156	Unigene0003425,KOG0023	Unigene0003489,KOG0156	Unigene0003535,KOG1208	Unigene0003536,KOG1208	Unigene0003537,KOG1208	Unigene0003538,KOG1208	Unigene0003539,KOG1208	Unigene0003539,KOG1205	Unigene0003609,KOG0022	Unigene0041172,KOG0156	Unigene0041192,KOG0024	Unigene0041192,KOG0022	Unigene0041197,KOG0054	Unigene0041198,KOG0054	Unigene0041199,KOG0054	Unigene0041547,KOG0156	Unigene0041548,KOG0156	Unigene0041549,KOG0156	Unigene0041593,KOG0065	Unigene0041593,KOG0061	Unigene0041594,KOG0065	Unigene0041594,KOG0061	Unigene0041599,KOG0157	Unigene0041611,KOG0156	Unigene0041852,KOG0061	Unigene0041852,KOG0065	Unigene0042012,KOG0143	Unigene0042013,KOG0143	Unigene0042163,KOG0156	Unigene0042164,KOG0156	Unigene0042165,KOG0156	Unigene0042166,KOG0156	Unigene0042175,KOG0065	Unigene0042188,KOG0029	Unigene0042189,KOG0029	Unigene0042190,KOG0029	Unigene0042316,KOG0157
R	General function prediction only	6176	0.192	Unigene0000029,KOG4197	Unigene0000039,KOG1075	Unigene0000046,KOG0619	Unigene0000051,KOG0619	Unigene0000069,KOG0274	Unigene0000070,KOG0274	Unigene0000070,KOG4155	Unigene0000071,KOG0274	Unigene0000086,KOG0017	Unigene0000095,KOG2382	Unigene0000096,KOG0725	Unigene0000098,KOG0143	Unigene0000100,KOG4197	Unigene0000101,KOG4197	Unigene0000114,KOG0134	Unigene0000115,KOG0134	Unigene0000116,KOG0017	Unigene0000120,KOG0017	Unigene0000121,KOG0017	Unigene0000123,KOG0017	Unigene0000125,KOG0017	Unigene0000126,KOG0017	Unigene0000132,KOG0825	Unigene0000132,KOG4443	Unigene0000141,KOG0619	Unigene0000142,KOG0017	Unigene0000143,KOG2471	Unigene0000155,KOG4197	Unigene0000177,KOG1198	Unigene0000183,KOG0610	Unigene0000189,KOG2615	Unigene0000201,KOG0619	Unigene0000202,KOG0619	Unigene0000203,KOG0619	Unigene0000204,KOG0619	Unigene0000206,KOG1196	Unigene0000242,KOG3135	Unigene0000245,KOG0619	Unigene0000256,KOG0619	Unigene0000266,KOG1947	Unigene0000266,KOG0619	Unigene0000267,KOG0619	Unigene0000271,KOG0619	Unigene0000288,KOG0825	Unigene0000288,KOG1246	Unigene0000291,KOG0619
S	Function unknown	1336	0.042	Unigene0000030,KOG4174	Unigene0000045,KOG2545	Unigene0000070,KOG0281	Unigene0000203,KOG0472	Unigene0000221,KOG2936	Unigene0000275,KOG0413	Unigene0003233,KOG4545	Unigene0003285,KOG0309	Unigene0003429,KOG2545	Unigene0003459,KOG1427	Unigene0003478,KOG2118	Unigene0003495,KOG4176	Unigene0003500,KOG2946	Unigene0003548,KOG3236	Unigene0003551,KOG1426	Unigene0003564,KOG3017	Unigene0003566,KOG2640	Unigene0003609,KOG4529	Unigene0003609,KOG3407	Unigene0040989,KOG2654	Unigene0041081,KOG1822	Unigene0041200,KOG1797	Unigene0041291,KOG1043	Unigene0041375,KOG4308	Unigene0041400,KOG0324	Unigene0041413,KOG1848	Unigene0041423,KOG3098	Unigene0041424,KOG1427	Unigene0041463,KOG3267	Unigene0041466,KOG2967	Unigene0041489,KOG1443	Unigene0041499,KOG2443	Unigene0041554,KOG4827	Unigene0041556,KOG4827	Unigene0041560,KOG1032	Unigene0041727,KOG0281	Unigene0041777,KOG1426	Unigene0041833,KOG3299	Unigene0041834,KOG4766	Unigene0041835,KOG4766	Unigene0041876,KOG2032	Unigene0041878,KOG2032	Unigene0041879,KOG2032	Unigene0042055,KOG0396	Unigene0042083,KOG4420	Unigene0042084,KOG4420
T	Signal transduction mechanisms	3380	0.105	Unigene0000034,KOG4658	Unigene0000035,KOG4658	Unigene0000047,KOG1187	Unigene0000057,KOG4658	Unigene0000058,KOG4658	Unigene0000059,KOG4658	Unigene0000099,KOG2381	Unigene0000102,KOG2301	Unigene0000102,KOG2302	Unigene0000103,KOG2301	Unigene0000190,KOG1187	Unigene0000191,KOG1187	Unigene0000203,KOG0617	Unigene0000243,KOG4658	Unigene0000254,KOG4658	Unigene0000271,KOG4658	Unigene0000288,KOG2043	Unigene0000291,KOG4658	Unigene0000305,KOG1052	Unigene0000342,KOG3348	Unigene0000342,KOG2313	Unigene0000354,KOG1818	Unigene0003199,KOG4658	Unigene0003207,KOG0671	Unigene0003213,KOG4658	Unigene0003215,KOG4658	Unigene0003216,KOG4658	Unigene0003236,KOG1187	Unigene0003276,KOG1187	Unigene0003277,KOG1187	Unigene0003281,KOG1187	Unigene0003303,KOG0581	Unigene0003305,KOG2607	Unigene0003306,KOG1187	Unigene0003307,KOG1187	Unigene0003308,KOG2232	Unigene0003353,KOG1989	Unigene0003353,KOG2345	Unigene0003415,KOG0498	Unigene0003435,KOG2417	Unigene0003456,KOG4658	Unigene0003476,KOG1187	Unigene0003490,KOG0027	Unigene0003533,KOG2088	Unigene0003582,KOG2088	Unigene0003589,KOG4747
U	Intracellular trafficking, secretion, and vesicular transport	1432	0.045	Unigene0000067,KOG3498	Unigene0000088,KOG0087	Unigene0000150,KOG0166	Unigene0000225,KOG3498	Unigene0000279,KOG2079	Unigene0000350,KOG2020	Unigene0000354,KOG1818	Unigene0003285,KOG0277	Unigene0003329,KOG2081	Unigene0003346,KOG1656	Unigene0003393,KOG0771	Unigene0003500,KOG3103	Unigene0003569,KOG0810	Unigene0003569,KOG0811	Unigene0003569,KOG0809	Unigene0003603,KOG1725	Unigene0040974,KOG0087	Unigene0040996,KOG4442	Unigene0041005,KOG1077	Unigene0041005,KOG1062	Unigene0041005,KOG1059	Unigene0041039,KOG0595	Unigene0041104,KOG0929	Unigene0041104,KOG0928	Unigene0041104,KOG0930	Unigene0041130,KOG2604	Unigene0041209,KOG0070	Unigene0041209,KOG0071	Unigene0041210,KOG0070	Unigene0041296,KOG0446	Unigene0041335,KOG1656	Unigene0041335,KOG1655	Unigene0041336,KOG1656	Unigene0041344,KOG2445	Unigene0041388,KOG2020	Unigene0041399,KOG4186	Unigene0041413,KOG0929	Unigene0041413,KOG0928	Unigene0041609,KOG1239	Unigene0041635,KOG1985	Unigene0041729,KOG0439	Unigene0041882,KOG2635	Unigene0041883,KOG0087	Unigene0042007,KOG1299	Unigene0042007,KOG1300	Unigene0042007,KOG1301
V	Defense mechanisms	215	0.007	Unigene0000124,KOG1529	Unigene0000128,KOG1529	Unigene0000269,KOG1716	Unigene0000298,KOG1823	Unigene0003340,KOG2764	Unigene0003603,KOG1726	Unigene0041100,KOG2392	Unigene0041101,KOG2392	Unigene0041164,KOG1515	Unigene0041845,KOG1502	Unigene0041846,KOG1502	Unigene0042026,KOG1529	Unigene0042244,KOG1823	Unigene0042488,KOG1726	Unigene0042554,KOG2400	Unigene0042908,KOG1502	Unigene0043024,KOG1502	Unigene0043650,KOG2764	Unigene0044308,KOG2764	Unigene0046311,KOG4297	Unigene0046333,KOG4297	Unigene0046357,KOG1515	Unigene0046799,KOG1726	Unigene0047357,KOG1515	Unigene0047635,KOG1759	Unigene0048827,KOG1515	Unigene0049273,KOG2392	Unigene0049483,KOG4297	Unigene0049880,KOG2392	Unigene0050506,KOG1502	Unigene0050868,KOG2392	Unigene0051547,KOG4297	Unigene0052710,KOG2764	Unigene0052917,KOG1515	Unigene0053823,KOG2787	Unigene0053896,KOG2392	Unigene0056256,KOG1502	Unigene0056257,KOG1502	Unigene0056317,KOG1962	Unigene0056318,KOG1962	Unigene0004183,KOG1515	Unigene0004268,KOG1502	Unigene0056482,KOG2764	Unigene0056544,KOG2392	Unigene0056747,KOG1515	Unigene0056796,KOG1216
W	Extracellular structures	123	0.004	Unigene0040956,KOG1021	Unigene0041073,KOG1836	Unigene0041421,KOG1836	Unigene0046110,KOG4291	Unigene0046110,KOG1214	Unigene0046311,KOG1225	Unigene0046359,KOG1834	Unigene0046963,KOG3681	Unigene0047098,KOG3544	Unigene0047182,KOG1437	Unigene0047926,KOG3587	Unigene0048466,KOG3544	Unigene0048832,KOG1021	Unigene0049204,KOG3544	Unigene0050274,KOG3544	Unigene0050795,KOG3681	Unigene0051006,KOG0994	Unigene0051006,KOG1836	Unigene0051119,KOG3544	Unigene0051986,KOG1437	Unigene0004186,KOG3544	Unigene0004291,KOG1021	Unigene0056769,KOG1565	Unigene0056796,KOG1216	Unigene0004570,KOG3544	Unigene0004708,KOG1021	Unigene0004922,KOG1565	Unigene0005073,KOG1836	Unigene0005302,KOG1021	Unigene0006299,KOG1565	Unigene0000478,KOG1022	Unigene0000478,KOG1021	Unigene0006972,KOG1021	Unigene0007762,KOG4237	Unigene0007844,KOG1021	Unigene0007861,KOG1021	Unigene0007861,KOG1022	Unigene0008843,KOG1021	Unigene0008957,KOG1021	Unigene0008958,KOG1021	Unigene0009340,KOG3544	Unigene0009340,KOG3539	Unigene0009439,KOG1214	Unigene0009439,KOG1216	Unigene0009439,KOG4291	Unigene0010446,KOG1437
Y	Nuclear structure	111	0.003	Unigene0000350,KOG2020	Unigene0041144,KOG2196	Unigene0041344,KOG2445	Unigene0041388,KOG2020	Unigene0043202,KOG2023	Unigene0043538,KOG1833	Unigene0043688,KOG2020	Unigene0043728,KOG2086	Unigene0043729,KOG2086	Unigene0044729,KOG0845	Unigene0045295,KOG2020	Unigene0048393,KOG2171	Unigene0049259,KOG2171	Unigene0049383,KOG4521	Unigene0049636,KOG2171	Unigene0050775,KOG0845	Unigene0051658,KOG1410	Unigene0051911,KOG2171	Unigene0051976,KOG1991	Unigene0053130,KOG1909	Unigene0054612,KOG0977	Unigene0005800,KOG2445	Unigene0006341,KOG1992	Unigene0006341,KOG1991	Unigene0006341,KOG1993	Unigene0006341,KOG2274	Unigene0006650,KOG2171	Unigene0006650,KOG2023	Unigene0006650,KOG1241	Unigene0006856,KOG2171	Unigene0007041,KOG2992	Unigene0009147,KOG1909	Unigene0010158,KOG2023	Unigene0012855,KOG2271	Unigene0013420,KOG2171	Unigene0013421,KOG2171	Unigene0015119,KOG2171	Unigene0016066,KOG2171	Unigene0020876,KOG0845	Unigene0022801,KOG1241	Unigene0022801,KOG2023	Unigene0022801,KOG2171	Unigene0022801,KOG1993	Unigene0022972,KOG2271	Unigene0022975,KOG2271	Unigene0023030,KOG1991
Z	Cytoskeleton	819	0.025	Unigene0000031,KOG0243	Unigene0000031,KOG4280	Unigene0000031,KOG0244	Unigene0000031,KOG0240	Unigene0000031,KOG0239	Unigene0000075,KOG0242	Unigene0000075,KOG4280	Unigene0000075,KOG0243	Unigene0000178,KOG0242	Unigene0000256,KOG0444	Unigene0003216,KOG0444	Unigene0003358,KOG0676	Unigene0041114,KOG1425	Unigene0041144,KOG0516	Unigene0041216,KOG1840	Unigene0041360,KOG0443	Unigene0041360,KOG0444	Unigene0041360,KOG0445	Unigene0041466,KOG1654	Unigene0041467,KOG1654	Unigene0041623,KOG0160	Unigene0041624,KOG0160	Unigene0041677,KOG0160	Unigene0042017,KOG1922	Unigene0042017,KOG1924	Unigene0042017,KOG1923	Unigene0042021,KOG1374	Unigene0042021,KOG1375	Unigene0042022,KOG1374	Unigene0042022,KOG1375	Unigene0042055,KOG2659	Unigene0042060,KOG2027	Unigene0042139,KOG4406	Unigene0042139,KOG1117	Unigene0042570,KOG0239	Unigene0042572,KOG0239	Unigene0042786,KOG0243	Unigene0042963,KOG3430	Unigene0042994,KOG2026	Unigene0042997,KOG2026	Unigene0043056,KOG0241	Unigene0043056,KOG4568	Unigene0043056,KOG0971	Unigene0043194,KOG1700	Unigene0043194,KOG1703	Unigene0043378,KOG0444
	sum	32146	1
[truncated: 5,000 more columns]

## Sheet: Sheet1
Table S7. Summary of KOG functional classification for the 'Huaxiu' plums (Prunus salicina Lindl.) unigenes
Code	Functional-Categories	Gene-Number	Percentage
A	RNA processing and modification	1841	0.057
B	Chromatin structure and dynamics	419	0.013
C	Energy production and conversion	1421	0.044
D	Cell cycle control, cell division, chromosome partitioning	766	0.024
E	Amino acid transport and metabolism	1164	0.036
F	Nucleotide transport and metabolism	301	0.009
G	Carbohydrate transport and metabolism	1314	0.041
H	Coenzyme transport and metabolism	278	0.009
I	Lipid transport and metabolism	1114	0.035
J	Translation, ribosomal structure and biogenesis	1759	0.055
K	Transcription	1537	0.048
L	Replication, recombination and repair	843	0.026
M	Cell wall/membrane/envelope biogenesis	343	0.011
N	Cell motility	20	0.001
O	Posttranslational modification, protein turnover, chaperones	3697	0.115
P	Inorganic ion transport and metabolism	777	0.024
Q	Secondary metabolites biosynthesis, transport and catabolism	960	0.03
R	General function prediction only	6176	0.192
S	Function unknown	1336	0.042
T	Signal transduction mechanisms	3380	0.105
U	Intracellular trafficking, secretion, and vesicular transport	1432	0.045
V	Defense mechanisms	215	0.007
W	Extracellular structures	123	0.004
Y	Nuclear structure	111	0.003
Z	Cytoskeleton	819	0.025
	sum	32146	1
