# Supplementary material for: Identification of Candidate Genes Associated with Pulp Color by Transcriptomic Analysis of ‘Huaxiu’ Plum (Prunus salicina Lindl.) during Fruit-Ripening
Source: Curr Issues Mol Biol. 2022 Dec 15;44(12):6368–84. doi: 10.3390/cimb44120434 (PMC9776821; doi:10.3390/cimb44120434)
Supplement: Supplementary file 1 [file cimb-44-00434-s001.zip › Table S9.xlsx]

## Sheet: Table S8
GeneID	YS_count	OS_count	YS_rpkm	OS_rpkm	log2 Ratio(OS/YS)	Pvalue	FDR	significant
Unigene0000011	6.5	43	0.34895	2.22135	2.67034	3.82865e-05	0.00194628	yes
Unigene0000056	91	197	2.00805	4.21685	1.07037	6.98908e-05	0.00325629	yes
Unigene0000090	81.5	23	1.8763	0.51135	-1.87551	1.86089e-05	0.00103864	yes
Unigene0000093	7365.5	15609.5	130.326	269.069	1.04585	1.43329e-09	2.15973e-07	yes
Unigene0000098	15	83	0.27225	1.4827	2.44522	0.000325502	0.0116903	yes
Unigene0000193	21.5	3	0.35715	0.04875	-2.87306	0.00112338	0.0316083	yes
Unigene0000195	0	28	0.001	0.94255	9.88043	0.00116306	0.0325908	yes
Unigene0000204	79.5	34.5	1.93675	0.8183	-1.24294	0.00165922	0.0430736	yes
Unigene0000224	11	105	0.3727	3.4875	3.22611	2.54223e-08	2.91519e-06	yes
Unigene0000238	78.5	175.5	0.775	1.68065	1.11675	0.000143656	0.00597543	yes
Unigene0000278	53.5	16	1.19295	0.3426	-1.79994	0.00049346	0.0163665	yes
Unigene0000300	4	25.5	0.0582	0.35935	2.6263	0.00068898	0.0214246	yes
Unigene0000312	69	180	0.5474	1.38845	1.34281	1.87777e-05	0.001047	yes
Unigene0000320	172	87.5	5.3791	2.6477	-1.02263	0.000251822	0.00946676	yes
Unigene0000378	2736	1354.5	29.5121	14.2209	-1.0533	1.61389e-06	0.000120597	yes
Unigene0000380	15.5	709	0.67975	30.4655	5.48603	9.92546e-20	5.77556e-17	yes
Unigene0000401	27.5	81	0.66315	1.89675	1.51612	0.0001413	0.00589536	yes
Unigene0000405	0	55	0.001	2.3639	11.207	5.02994e-13	1.42553e-10	yes
Unigene0000448	0	46	0.001	0.6543	9.35381	0.000305728	0.0110995	yes
Unigene0000505	83.5	21	1.26025	0.3076	-2.03458	6.94961e-07	5.66512e-05	yes
Unigene0000526	0	30	0.001	1.0115	9.98228	0.000956943	0.0277681	yes
Unigene0000544	36.5	92.5	2.13505	5.23325	1.29344	0.000436831	0.0148501	yes
Unigene0000588	141	292.5	1.96415	3.95745	1.01067	3.23852e-05	0.00168065	yes
Unigene0000647	75	23	1.17925	0.3485	-1.75864	0.00145371	0.0385247	yes
Unigene0000683	268.5	136	2.24545	1.10505	-1.02289	0.000783124	0.0237191	yes
Unigene0000684	93	29.5	1.2377	0.382	-1.69602	1.54522e-05	0.000875857	yes
Unigene0000722	0	49.5	0.001	1.18585	10.2117	0.00025444	0.00953899	yes
Unigene0000789	138	32.5	1.5582	0.35505	-2.13379	1.43257e-08	1.74908e-06	yes
Unigene0000816	0	45	0.001	1.18965	10.2163	0.000320526	0.0115495	yes
Unigene0000887	47	112.5	0.65105	1.50445	1.2084	0.000890226	0.0262358	yes
Unigene0000929	384	184.5	3.43555	1.59735	-1.10486	3.71112e-06	0.000254056	yes
Unigene0001027	1469.5	226	12.9346	1.9247	-2.74853	6.13063e-41	1.68439e-37	yes
Unigene0001105	47677.5	122725	532.761	1326.96	1.31656	4.42786e-27	5.38211e-24	yes
Unigene0001111	102.5	51	4.1263	1.9872	-1.05411	0.00172899	0.0443169	yes
Unigene0001112	118	56	7.50355	3.4403	-1.12504	0.000614019	0.0195038	yes
Unigene0001123	115.5	32	2.57	0.68855	-1.90014	6.90306e-06	0.00043054	yes
Unigene0001146	92.5	226.5	1.875	4.45795	1.24949	5.45406e-06	0.000353049	yes
Unigene0001198	120	407.5	2.29585	7.66345	1.73897	0.000208256	0.00810759	yes
Unigene0001290	132.5	307.5	1.6502	3.70505	1.16685	3.80939e-06	0.000259161	yes
Unigene0001310	129	310.5	1.27215	2.99535	1.23546	0.000877609	0.0259058	yes
Unigene0001392	957	2316.5	3.71565	8.73195	1.23269	1.29656e-19	7.46521e-17	yes
Unigene0001416	45.5	121	2.3312	6.0216	1.36907	8.4734e-05	0.00382408	yes
Unigene0001434	361	762.5	4.9351	10.0656	1.02829	1.05644e-07	1.05834e-05	yes
Unigene0001473	125.5	263.5	1.8369	3.7291	1.02155	0.000148445	0.00615593	yes
Unigene0001578	132	31.5	1.1748	0.2708	-2.11712	1.8544e-09	2.70486e-07	yes
Unigene0001611	2	79.5	0.14225	5.595	5.29764	1.20826e-06	9.29529e-05	yes
Unigene0001634	128.5	392.5	1.22345	3.63355	1.57042	6.06366e-10	9.84185e-08	yes
Unigene0001642	5	48.5	0.0587	0.55195	3.23311	1.43138e-07	1.38328e-05	yes
Unigene0001678	1	104	0.02525	2.62355	6.69909	0.000507957	0.0167375	yes
Unigene0001695	161	364.5	2.2448	4.93135	1.1354	4.8896e-05	0.00238796	yes
Unigene0001718	11.5	77.5	0.1679	1.0957	2.70618	3.00425e-08	3.40068e-06	yes
Unigene0001719	93	40	0.99675	0.4125	-1.27284	0.00169632	0.0437666	yes
Unigene0001750	282.5	63	3.91205	0.84715	-2.20724	6.19394e-13	1.71109e-10	yes
Unigene0001779	270	575	3.0923	6.39165	1.04751	2.99526e-06	0.000208973	yes
Unigene0001789	1040	501.5	27.104	12.6499	-1.09938	3.37534e-11	7.01993e-09	yes
Unigene0001809	0	51.5	0.001	1.88145	10.8776	8.22839e-06	0.000501199	yes
Unigene0001817	16	0.5	0.46205	0.0136	-5.08637	0.000570167	0.0184648	yes
Unigene0001841	126.5	58	1.25125	0.558	-1.16503	0.000780626	0.0236993	yes
Unigene0001891	254	66.5	5.8835	1.49285	-1.97861	6.49087e-13	1.78411e-10	yes
Unigene0001898	630.5	125	7.51605	1.43725	-2.38666	5.29007e-19	2.86491e-16	yes
Unigene0001936	22	0	0.7132	0.001	-9.47816	2.92458e-06	0.000204825	yes
Unigene0001937	2074.5	1061	18.3891	9.1417	-1.00831	3.80291e-11	7.81999e-09	yes
Unigene0001951	7.5	41.5	0.14645	0.78525	2.42274	4.48493e-05	0.0022261	yes
Unigene0001955	151764	338670	425.079	919.26	1.11274	1.56206e-19	8.7185e-17	yes
Unigene0001957	8560.5	30632	117.716	407.868	1.7928	3.18646e-43	1.16195e-39	yes
Unigene0002043	133.5	322	0.5557	1.29705	1.22286	2.28795e-07	2.11039e-05	yes
Unigene0002084	804.5	1780.5	9.10845	19.4776	1.09654	1.34473e-12	3.51933e-10	yes
Unigene0002155	27.5	3	0.67135	0.07155	-3.23004	0.000137887	0.00580128	yes
Unigene0002156	25	82	1.53785	4.8427	1.6549	0.00131443	0.0356984	yes
Unigene0002157	150.5	399.5	5.327	13.5588	1.34784	0.000306279	0.0111093	yes
Unigene0002158	33	103	2.6588	7.99185	1.58775	0.00051849	0.0170435	yes
Unigene0002159	17877	40851.5	66.1492	145.871	1.1409	2.1122e-14	7.45376e-12	yes
Unigene0002160	157869	336836	681.681	1405.06	1.04346	4.12015e-14	1.37417e-11	yes
Unigene0002161	94946	201738	1146.79	2355.22	1.03826	2.20442e-14	7.72931e-12	yes
Unigene0002165	6	40.5	0.15105	0.9909	2.71371	2.15376e-05	0.00117806	yes
Unigene0002219	93	34.5	0.72895	0.2613	-1.48011	0.000398365	0.013791	yes
Unigene0002279	375.5	184.5	3.87125	1.84115	-1.07219	5.23997e-07	4.4027e-05	yes
Unigene0002285	193	85.5	3.0176	1.2883	-1.22793	0.000132729	0.00564103	yes
Unigene0002365	2	89.5	0.0286	1.2748	5.47811	0.00126596	0.0347617	yes
Unigene0002395	13	56.5	0.20685	0.87065	2.07351	2.07478e-05	0.00114402	yes
Unigene0002497	237.5	91.5	3.3078	1.2315	-1.42546	3.81528e-07	3.31777e-05	yes
Unigene0002680	0.5	16.5	0.02095	0.6688	4.99655	0.000470066	0.0157837	yes
Unigene0002681	6.5	32	0.0898	0.4294	2.25753	0.00140956	0.0376097	yes
Unigene0002687	8.5	84.5	0.26275	2.58245	3.29698	8.04052e-05	0.00367112	yes
Unigene0002746	0	49	0.001	1.0437	10.0275	0.000259037	0.00967815	yes
Unigene0002811	155	60	4.7728	1.7973	-1.409	3.89152e-05	0.00197397	yes
Unigene0002819	68.5	20.5	3.1323	0.909	-1.78487	9.13458e-05	0.00408205	yes
Unigene0002894	1293.5	3913	23.5624	69.1485	1.55321	1.23458e-29	1.68823e-26	yes
Unigene0003179	7	582.5	0.14985	12.3584	6.36583	4.51942e-11	9.224e-09	yes
Unigene0003190	442.5	184.5	3.15705	1.27285	-1.31051	3.74962e-08	4.11016e-06	yes
Unigene0003194	0	28	0.001	2.5845	11.3357	8.76387e-06	0.000532038	yes
Unigene0003207	35.5	6	3.23615	0.5324	-2.6037	8.4413e-05	0.00381274	yes
Unigene0003237	9.5	57.5	0.17865	1.04335	2.54602	2.13212e-06	0.000155497	yes
Unigene0003242	238.5	118.5	2.3038	1.11125	-1.05183	8.28943e-05	0.00375655	yes
Unigene0003350	443	208	4.17195	1.90185	-1.13332	4.21678e-08	4.56731e-06	yes
Unigene0003369	122	45	11.4131	4.0867	-1.48168	8.08662e-06	0.000493112	yes
Unigene0003449	0	25	0.001	0.9167	9.84031	0.0017254	0.0442456	yes
Unigene0003469	122.5	451.5	6.9106	24.6849	1.83675	6.05549e-16	2.45351e-13	yes
Unigene0003499	54.5	120.5	0.94225	2.0224	1.10189	0.000884061	0.0260681	yes
Unigene0003618	4	3573	0.12765	111.716	9.77343	4.21947e-61	3.84661e-57	yes
Unigene0003638	151298	370489	1637.43	3881.81	1.24529	2.99492e-22	2.21373e-19	yes
Unigene0003676	54.5	124.5	2.77675	6.1239	1.14105	0.00107697	0.0306934	yes
Unigene0003741	0	15	0.001	0.489	8.93369	0.0011057	0.0312234	yes
Unigene0003791	41	104	0.7672	1.8943	1.30399	0.000478292	0.0160108	yes
Unigene0003794	141.5	446.5	3.40145	10.3937	1.61149	5.92437e-13	1.64493e-10	yes
Unigene0003797	15	48.5	1.01625	3.18545	1.64824	0.00174732	0.0447239	yes
Unigene0003798	776	1695.5	5.84045	12.3348	1.07858	2.40874e-13	7.31962e-11	yes
Unigene0003799	171	466.5	4.0242	10.6234	1.40046	1.69612e-09	2.49394e-07	yes
Unigene0003804	126.5	607.5	2.7369	12.7066	2.21496	5.03134e-15	1.88496e-12	yes
Unigene0003892	0	91	0.001	1.90155	10.893	6.9867e-05	0.00325629	yes
Unigene0003994	1	686.5	0.0131	8.94345	9.41512	1.6234e-13	5.01677e-11	yes
Unigene0003999	46	7	1.1261	0.1643	-2.77693	7.91099e-06	0.000485651	yes
Unigene0004018	412.5	179	7.84245	3.30825	-1.24524	8.49505e-06	0.000516866	yes
Unigene0004030	26	3.5	0.6146	0.08115	-2.92098	0.000399794	0.0138317	yes
Unigene0004063	0	67.5	0.001	0.8363	9.70788	0.000126649	0.00543166	yes
Unigene0004121	1	69	0.03045	2.0802	6.09414	0.000197668	0.00776875	yes
Unigene0004124	8.5	63.5	0.3821	2.7491	2.84694	0.000671014	0.0209732	yes
Unigene0004184	609.5	1708	8.24065	22.3169	1.43731	2.80633e-14	9.59378e-12	yes
Unigene0004207	90	36.5	1.512	0.5948	-1.34598	0.000774975	0.0235891	yes
Unigene0004276	0	41.5	0.001	0.8016	9.64674	0.000392597	0.0136353	yes
Unigene0004277	84	179.5	1.6468	3.4183	1.05361	0.000333664	0.0118975	yes
Unigene0004287	1383.5	415	26.3109	7.6231	-1.78721	5.38974e-13	1.51183e-10	yes
Unigene0004319	306	635	4.1889	8.4302	1.009	3.3651e-08	3.74876e-06	yes
Unigene0004336	113.5	27.5	1.40935	0.33435	-2.0756	5.46353e-05	0.00263531	yes
Unigene0004345	1	42	0.0221	0.8906	5.33266	9.00657e-09	1.14938e-06	yes
Unigene0004428	159.5	406	7.24725	17.8517	1.30056	1.41624e-07	1.37107e-05	yes
Unigene0004436	144	67	2.9761	1.3337	-1.15799	0.000862736	0.0255824	yes
Unigene0004446	199	941.5	1.12875	5.14555	2.1886	5.34346e-14	1.70922e-11	yes
Unigene0004475	96.5	34.5	0.90065	0.30805	-1.5478	0.00180049	0.0455942	yes
Unigene0004497	84.5	18	0.98985	0.202	-2.29285	5.70154e-06	0.000365607	yes
Unigene0004509	138	366	2.0881	5.36765	1.3621	1.09095e-09	1.66684e-07	yes
Unigene0004525	2	318.5	0.00805	1.27655	7.30905	0.000391649	0.0136275	yes
Unigene0004551	0	20	0.001	0.59615	9.21953	0.000213265	0.00827318	yes
Unigene0004570	0	45	0.001	1.56775	10.6145	0.000320455	0.0115495	yes
Unigene0004642	519.5	184.5	6.17345	2.1187	-1.5429	3.32489e-08	3.71153e-06	yes
Unigene0004698	31.5	2	1.2403	0.07645	-4.02003	6.42489e-06	0.000404406	yes
Unigene0004716	1431.5	3186	15.9252	34.2171	1.10341	2.8372e-13	8.34351e-11	yes
Unigene0004727	4	29	0.1066	0.7512	2.81699	0.000187567	0.00748325	yes
Unigene0004728	180	595	0.87415	2.7821	1.67022	2.09037e-08	2.44838e-06	yes
Unigene0004744	70.5	24.5	2.01265	0.6822	-1.56083	0.00135412	0.0363591	yes
Unigene0004745	45	132.5	1.0786	3.0828	1.51508	4.75128e-06	0.000312738	yes
Unigene0004805	722.5	213.5	8.3085	2.36475	-1.8129	9.0491e-14	2.86108e-11	yes
Unigene0004814	33	457	1.11105	15.1096	3.76547	4.80676e-14	1.565e-11	yes
Unigene0004867	0	47	0.001	0.82945	9.69601	1.93091e-08	2.29104e-06	yes
Unigene0004880	22	78.5	0.27645	0.95605	1.79007	1.33945e-05	0.000772838	yes
Unigene0004902	56.5	276.5	0.36025	1.7437	2.27508	0.00104537	0.0299429	yes
Unigene0004903	139	17	2.21355	0.26265	-3.07515	1.62014e-12	4.1027e-10	yes
Unigene0004904	28.5	5	0.64765	0.1118	-2.53429	0.00151947	0.0400866	yes
Unigene0004913	29	79.5	0.27135	0.72315	1.41414	0.000484826	0.0161603	yes
Unigene0004939	0	70.5	0.001	0.89085	9.79904	0.00011484	0.00499722	yes
Unigene0004942	58.5	7	0.8513	0.09685	-3.13584	3.72126e-06	0.000254432	yes
Unigene0004953	1080.5	469	10.8262	4.5412	-1.25338	2.89401e-07	2.61647e-05	yes
Unigene0004990	400.5	948.5	9.76145	22.5298	1.20667	6.03121e-07	4.97579e-05	yes
Unigene0005022	589	278	6.23475	2.8381	-1.13541	3.6936e-07	3.24811e-05	yes
Unigene0005042	49	238.5	0.4975	2.3407	2.23417	1.0661e-11	2.3899e-09	yes
Unigene0005072	271.5	864.5	1.9894	6.1227	1.62183	1.80203e-16	7.46724e-14	yes
Unigene0005090	734.5	232	7.576	2.3192	-1.70781	2.03771e-21	1.34287e-18	yes
Unigene0005097	0	30	0.001	0.3909	8.61066	8.92814e-07	7.08783e-05	yes
Unigene0005132	136.5	17	1.6138	0.197	-3.03419	1.13399e-11	2.51121e-09	yes
Unigene0005133	5	30	0.06335	0.36675	2.53338	0.00128065	0.0351102	yes
Unigene0005153	0	57.5	0.001	1.23605	10.2715	0.000177575	0.00715769	yes
Unigene0005167	33	149	0.42525	1.86905	2.13592	5.28753e-09	7.07133e-07	yes
Unigene0005177	44	126	0.39175	1.0908	1.47738	0.000328915	0.0117742	yes
Unigene0005185	87.5	27	1.36095	0.40205	-1.75917	0.00126224	0.034712	yes
Unigene0005187	39	2	0.6839	0.0331	-4.36888	2.37199e-07	2.17325e-05	yes
Unigene0005189	493.5	175	7.45265	2.5653	-1.53863	1.31298e-08	1.61387e-06	yes
Unigene0005195	108	3921	1.15575	41.3633	5.16145	2.24361e-20	1.39456e-17	yes
Unigene0005214	556.5	2978.5	2.38085	12.3833	2.37884	8.77083e-57	6.85352e-53	yes
Unigene0005220	467.5	168.5	22.7431	7.9565	-1.51523	6.94095e-09	9.08268e-07	yes
Unigene0005221	249	79	10.2401	3.1482	-1.70164	2.53194e-10	4.39029e-08	yes
Unigene0005247	0	31	0.001	0.88915	9.79628	0.000864944	0.0256132	yes
Unigene0005302	44.5	8.5	0.92385	0.17235	-2.42232	4.12456e-05	0.00206977	yes
Unigene0005338	12	251	0.20705	4.2809	4.36986	4.05261e-08	4.39821e-06	yes
Unigene0005359	73.5	22.5	2.312	0.69055	-1.74332	0.00108092	0.0307618	yes
Unigene0005392	82.5	36.5	0.78465	0.3375	-1.21716	0.00135454	0.0363591	yes
Unigene0005421	1	18.5	0.0298	0.533	4.16075	0.0005681	0.0184087	yes
Unigene0005453	31.5	8	0.7501	0.1859	-2.01256	0.00198421	0.0493104	yes
Unigene0005512	53	16.5	0.6702	0.2013	-1.73524	0.000620598	0.0196671	yes
Unigene0005544	0	34.5	0.001	0.6298	9.29875	0.000641511	0.0201779	yes
Unigene0005548	174.5	458.5	1.7016	4.3324	1.34827	2.356e-10	4.1172e-08	yes
Unigene0005549	105.5	45	3.1332	1.29765	-1.27174	0.000302289	0.0110084	yes
Unigene0005569	12	164.5	0.2961	4.0101	3.75948	2.27674e-06	0.000164292	yes
Unigene0005584	186	37	1.624	0.3148	-2.36704	5.38427e-11	1.07485e-08	yes
Unigene0005585	1	18.5	0.01625	0.2935	4.17485	0.000915388	0.0268615	yes
Unigene0005586	76	27.5	0.6218	0.2176	-1.51477	0.00042607	0.0145113	yes
Unigene0005589	12	49	0.1985	0.79185	1.99609	0.000599259	0.0191016	yes
Unigene0005644	8	35.5	0.21525	0.9291	2.10982	0.000961388	0.0278528	yes
Unigene0005654	5	34	0.12435	0.81555	2.71337	8.88024e-05	0.00398467	yes
Unigene0005662	0	30.5	0.001	1.0469	10.0319	0.000921017	0.0269758	yes
Unigene0005664	32	2.5	0.43995	0.0324	-3.76327	6.37512e-05	0.00301388	yes
Unigene0005693	16	0	0.54325	0.001	-9.08547	6.96833e-05	0.00325216	yes
Unigene0005739	0	64.5	0.001	1.19805	10.2265	1.93575e-09	2.80853e-07	yes
Unigene0005745	26	4	1.69065	0.252	-2.74608	0.000635603	0.0200648	yes
Unigene0005773	2.5	24.5	0.0556	0.53385	3.26328	0.000677437	0.0211257	yes
Unigene0005816	11	0	0.5697	0.001	-9.15406	0.00169566	0.0437666	yes
Unigene0005897	145	311	2.033	4.2123	1.051	3.17373e-05	0.00165173	yes
Unigene0005975	581	275	23.9876	10.9692	-1.12884	4.5544e-08	4.91354e-06	yes
Unigene0006088	134.5	62.5	2.1066	0.9454	-1.15592	0.000283082	0.0104269	yes
Unigene0006150	70.5	386.5	4.42675	23.5847	2.41353	1.03725e-17	5.02083e-15	yes
Unigene0006226	84	207	1.17955	2.8026	1.24853	5.79826e-05	0.00277232	yes
Unigene0006285	0	11	0.001	0.612	9.25739	0.00168263	0.043516	yes
Unigene0006298	168	55.5	4.99825	1.5981	-1.64507	8.85244e-07	7.04819e-05	yes
Unigene0006318	7	39.5	0.0762	0.41625	2.44959	5.58415e-05	0.00267931	yes
Unigene0006325	1	20	0.05115	0.993	4.27899	0.000208735	0.00812049	yes
Unigene0006384	124	51.5	2.8801	1.1586	-1.31374	0.000292708	0.0107381	yes
Unigene0006421	4.5	34	0.1305	0.96385	2.88476	0.000130882	0.00557987	yes
Unigene0006580	9.5	53.5	0.6717	3.64385	2.43957	1.54115e-05	0.000875365	yes
Unigene0006639	17.5	137	0.9772	7.5009	2.94034	8.75432e-08	8.93365e-06	yes
Unigene0006642	8	36.5	0.21665	0.9565	2.1424	0.000467659	0.0157125	yes
Unigene0006695	12.5	62.5	0.2629	1.2907	2.29557	0.00078315	0.0237191	yes
Unigene0006697	4	27	0.17915	1.1837	2.72406	0.00108464	0.0308196	yes
Unigene0006701	0	124	0.001	1.6936	10.7259	4.14267e-05	0.00207696	yes
Unigene0006776	3	220	0.0386	2.75645	6.15807	1.62729e-22	1.28999e-19	yes
Unigene0006837	40.5	110	0.42995	1.1392	1.40578	0.000834436	0.024941	yes
Unigene0006839	92.5	13	0.9818	0.1356	-2.85607	9.71426e-08	9.82164e-06	yes
Unigene0006873	208.5	84	3.3896	1.32655	-1.35344	7.82976e-06	0.000482833	yes
Unigene0006879	0	76	0.001	1.53895	10.5877	9.77623e-05	0.00432574	yes
Unigene0006921	1	32	0.0119	0.36895	4.95439	4.754e-07	4.0253e-05	yes
Unigene0007014	33.5	92	0.45165	1.1974	1.40663	0.000303107	0.0110309	yes
Unigene0007065	4.5	65	0.24175	3.43755	3.82979	1.28549e-06	9.82036e-05	yes
Unigene0007071	5	49.5	0.1123	1.07845	3.26353	1.12928e-07	1.11699e-05	yes
Unigene0007089	62.5	257.5	0.69815	2.82585	2.01708	0.000495566	0.0164083	yes
Unigene0007118	130.5	57	7.95795	3.37055	-1.23941	0.0001963	0.00774692	yes
Unigene0007186	2	426.5	0.0479	10.0834	7.71774	2.35136e-11	5.04372e-09	yes
Unigene0007414	2.5	27.5	0.03275	0.3512	3.42273	0.00022945	0.00875818	yes
Unigene0007439	16	1	0.4063	0.02525	-4.00819	0.00124568	0.0343283	yes
Unigene0007466	7	45.5	0.2512	1.5699	2.64376	2.80339e-05	0.0014794	yes
Unigene0007499	722.5	2306	6.35345	19.5983	1.62512	2.14619e-24	2.17393e-21	yes
Unigene0007522	9.5	65	0.10665	0.7113	2.73757	2.50174e-06	0.000177946	yes
Unigene0007527	2864.5	1298.5	86.8681	38.0849	-1.18961	2.28167e-19	1.26064e-16	yes
Unigene0007528	316.5	160.5	4.62075	2.2623	-1.03034	0.000419216	0.0143378	yes
Unigene0007533	0	36.5	0.001	2.0568	11.0062	1.68929e-06	0.000125887	yes
Unigene0007537	0	16.5	0.001	0.6565	9.35865	6.9347e-05	0.003242	yes
Unigene0007567	3.5	23	0.11335	0.7217	2.67061	0.00160902	0.0419496	yes
Unigene0007595	143.5	39	2.03645	0.54065	-1.91329	4.45483e-05	0.00221317	yes
Unigene0007602	6	42	0.12315	0.83175	2.75573	0.000165753	0.0067609	yes
Unigene0007604	35.5	89	0.90295	2.18945	1.27785	0.00109251	0.0309788	yes
Unigene0007605	7.5	38.5	0.4343	2.15515	2.31102	0.0002006	0.00786554	yes
Unigene0007612	3	23	0.05975	0.4447	2.89582	0.000869005	0.0256913	yes
Unigene0007616	1.5	18	0.08345	0.9817	3.5563	0.00181241	0.0458534	yes
Unigene0007726	269.5	123	19.3094	8.55865	-1.17385	6.99691e-05	0.00325716	yes
Unigene0007729	153.5	64.5	1.27085	0.51985	-1.28963	0.000201839	0.0079056	yes
Unigene0007730	55.5	10	1.44155	0.2517	-2.51784	4.24955e-06	0.000284855	yes
Unigene0007743	23	64.5	0.7795	2.1093	1.43614	0.00138035	0.0369746	yes
Unigene0007745	76	165.5	0.7132	1.49715	1.06984	0.00122377	0.0339269	yes
Unigene0007835	940	483.5	5.54575	2.7714	-1.00077	1.24172e-06	9.52588e-05	yes
Unigene0007844	35.5	89	0.4433	1.0774	1.2812	0.00156958	0.0411061	yes
Unigene0008086	40	8	0.599	0.1153	-2.37716	0.000240722	0.00911213	yes
Unigene0008107	185.5	3581.5	6.14225	116.105	4.24051	8.12899e-35	1.53324e-31	yes
Unigene0008325	0	11.5	0.001	0.7363	9.52415	0.00180966	0.045805	yes
Unigene0008602	42	3	0.76825	0.0527	-3.8657	5.92715e-07	4.90474e-05	yes
Unigene0008987	0	30	0.001	1.3866	10.4373	0.000956863	0.0277681	yes
Unigene0009166	5.5	32	0.20735	1.17025	2.49668	0.000289271	0.0106406	yes
Unigene0009263	0	152.5	0.001	4.6941	12.1966	3.3017e-06	0.000228314	yes
Unigene0009272	0	28.5	0.001	1.30575	10.3507	0.00108156	0.0307641	yes
Unigene0009440	21.5	0	0.76745	0.001	-9.58393	2.53759e-05	0.00135813	yes
Unigene0009442	26	91.5	0.51065	1.7545	1.78065	0.000479049	0.0160263	yes
Unigene0009731	0	31	0.001	0.8093	9.66053	0.000864685	0.0256132	yes
Unigene0009955	98.5	15.5	2.62645	0.40545	-2.69552	3.63639e-07	3.20295e-05	yes
Unigene0010034	2	27	0.0874	1.13155	3.69452	0.000677179	0.0211257	yes
Unigene0010054	38.5	8	0.9567	0.19425	-2.30015	0.000780762	0.0236993	yes
Unigene0010092	679.5	344	18.8775	9.27305	-1.02555	1.58611e-07	1.52473e-05	yes
Unigene0010463	33	6	0.9314	0.16205	-2.52296	0.000396375	0.0137395	yes
Unigene0010750	0	27.5	0.001	0.83085	9.69844	0.00123545	0.034164	yes
Unigene0010770	43.5	13.5	0.74405	0.22235	-1.74257	0.00118674	0.0331355	yes
Unigene0010798	50.5	15	2.58825	0.74875	-1.78942	0.000782728	0.0237191	yes
Unigene0010837	2	20	0.06005	0.58605	3.28679	0.000978782	0.0282519	yes
Unigene0011023	0	42.5	0.001	0.6236	9.28448	0.000371275	0.013022	yes
Unigene0011067	33	154.5	1.10625	5.0867	2.20105	0.000641498	0.0201779	yes
Unigene0011192	412	2084	9.37585	46.0153	2.29509	1.55911e-23	1.44543e-20	yes
Unigene0011241	454	137.5	12.435	3.66135	-1.76395	6.76124e-11	1.30681e-08	yes
Unigene0011307	4.5	31	0.09845	0.66375	2.75318	0.000441034	0.0149558	yes
Unigene0011355	0	16	0.001	0.8669	9.75972	0.000869404	0.0256913	yes
Unigene0011442	0	46	0.001	2.06685	11.0132	0.000305805	0.0110995	yes
Unigene0011469	12	0	0.4153	0.001	-8.69801	0.00109241	0.0309788	yes
Unigene0011473	54.5	5	1.04355	0.09125	-3.51553	2.44223e-06	0.000174393	yes
Unigene0011544	1	36	0.0363	1.29315	5.15478	2.14837e-05	0.00117629	yes
Unigene0011718	12	0	0.5956	0.001	-9.2182	0.000798717	0.0240441	yes
Unigene0012002	0	12	0.001	0.6031	9.23625	0.000878583	0.0259206	yes
Unigene0012080	653	324.5	9.5469	4.60025	-1.05332	2.88722e-09	4.039e-07	yes
Unigene0012450	15	61	1.1177	4.4243	1.98492	0.000266274	0.00990793	yes
Unigene0012690	17	1	0.3311	0.01935	-4.09686	0.000675853	0.0211003	yes
Unigene0012744	0	20.5	0.001	0.5435	9.08614	6.58571e-05	0.00310271	yes
Unigene0012798	66	190.5	1.00825	2.82715	1.4875	4.60886e-07	3.91452e-05	yes
Unigene0012804	95.5	42	1.1854	0.5023	-1.23875	0.00183664	0.0463807	yes
Unigene0012850	347.5	171.5	3.56085	1.6942	-1.07162	5.68678e-05	0.00272616	yes
Unigene0012937	823.5	1885.5	16.3224	36.3843	1.15646	1.41265e-10	2.54175e-08	yes
Unigene0012945	36	713.5	0.43955	8.5754	4.2861	1.8411e-14	6.58201e-12	yes
Unigene0012999	11.5	0	0.8514	0.001	-9.73369	0.00131178	0.0356887	yes
Unigene0013001	0	35.5	0.001	1.0338	10.0137	0.000595342	0.0189988	yes
Unigene0013084	25	2	0.7628	0.05915	-3.68885	4.39196e-05	0.0021899	yes
Unigene0013140	19	1	0.8039	0.0399	-4.33256	0.000339904	0.0120963	yes
Unigene0013184	0	33.5	0.001	0.6746	9.39789	2.27441e-09	3.23132e-07	yes
Unigene0013250	1804	469	28.1718	7.10055	-1.98825	2.71644e-22	2.06366e-19	yes
Unigene0013310	386.5	149	3.6889	1.3824	-1.41602	4.95787e-09	6.64671e-07	yes
Unigene0013525	4052	1830.5	154.919	67.8102	-1.19194	8.89088e-12	2.04333e-09	yes
Unigene0013592	27.5	5	0.68975	0.12145	-2.50571	0.000972828	0.0281246	yes
Unigene0013594	222.5	2349	5.82335	60.175	3.36924	7.44276e-20	4.42504e-17	yes
Unigene0013599	74.5	15.5	2.28345	0.45935	-2.31355	2.70579e-07	2.46259e-05	yes
Unigene0013600	0	45.5	0.001	1.6454	10.6842	0.000313198	0.0113302	yes
Unigene0013810	406.5	120.5	10.3012	2.9504	-1.80384	5.27364e-13	1.48689e-10	yes
Unigene0013864	52	4	1.60785	0.1201	-3.74282	7.67581e-08	7.90681e-06	yes
Unigene0014377	275.5	125.5	6.7151	2.98695	-1.16874	0.000590453	0.0188869	yes
Unigene0014407	10.5	77	0.2555	1.8501	2.85621	0.000238865	0.00905435	yes
Unigene0014601	54	7	0.878	0.11055	-2.98952	2.55881e-05	0.00136815	yes
Unigene0014625	0	12	0.001	0.23865	7.89875	0.000904872	0.0265815	yes
Unigene0014701	103	37	2.66565	0.9245	-1.52774	0.000134522	0.0056863	yes
Unigene0014717	0	107	0.001	1.6389	10.6785	5.32373e-05	0.00257697	yes
Unigene0014768	92	28.5	0.80105	0.2401	-1.73826	5.5657e-06	0.000358578	yes
Unigene0014772	75	15	2.9809	0.5727	-2.3799	2.21321e-06	0.000160554	yes
Unigene0014968	75	20.5	0.97125	0.25395	-1.9353	0.000260788	0.0097369	yes
Unigene0015211	89.5	15	3.16205	0.51195	-2.62679	2.20304e-05	0.00120142	yes
Unigene0015261	1	78.5	0.0307	2.3752	6.27367	1.71463e-07	1.63108e-05	yes
Unigene0015271	0	29.5	0.001	1.18325	10.2085	0.000999336	0.0287542	yes
Unigene0015404	30.5	173	0.7292	3.98665	2.45079	3.28839e-10	5.5453e-08	yes
Unigene0015503	3	26	0.04135	0.3445	3.05854	0.000560468	0.0181938	yes
Unigene0015839	0	24	0.001	0.5919	9.20921	0.00191712	0.0480399	yes
Unigene0015849	1	20.5	0.0278	0.5622	4.33793	0.000820616	0.0246221	yes
Unigene0015868	56	11	1.3642	0.2623	-2.37877	1.32065e-05	0.000762798	yes
Unigene0016093	12	0	0.527	0.001	-9.04166	0.000849854	0.0252912	yes
Unigene0016122	3	53	0.06795	1.1863	4.12585	0.000126175	0.00541722	yes
Unigene0016287	0.5	15	0.0207	0.60075	4.85906	0.000899922	0.0264645	yes
Unigene0016386	72	464.5	1.4392	9.1232	2.66427	4.17236e-07	3.59968e-05	yes
Unigene0016453	672.5	250	29.0841	10.4926	-1.47086	3.04727e-11	6.38618e-09	yes
Unigene0016467	269	123	7.67825	3.38735	-1.18062	9.1036e-05	0.00407153	yes
Unigene0016527	76	31.5	5.69125	2.28705	-1.31526	0.000859412	0.0255063	yes
Unigene0016646	11.5	0	0.41615	0.001	-8.70096	0.00131211	0.0356887	yes
Unigene0016686	4586	2214.5	130.653	61.0671	-1.09728	3.76835e-22	2.6769e-19	yes
Unigene0016865	17.5	94	1.6319	8.51715	2.38382	3.39493e-07	3.01592e-05	yes
Unigene0016982	14	0	0.5835	0.001	-9.18859	0.00060712	0.0193409	yes
Unigene0017141	71	12	1.47685	0.24175	-2.61094	9.50358e-07	7.51195e-05	yes
Unigene0017309	2	111	0.05185	2.8342	5.77245	9.03407e-08	9.18486e-06	yes
Unigene0017330	105	9.5	2.09565	0.186	-3.49402	3.14563e-12	7.61327e-10	yes
Unigene0017457	12.5	160	0.16515	2.05295	3.63585	1.39323e-19	7.8564e-17	yes
Unigene0017458	34.5	2	2.0183	0.11045	-4.19168	2.03278e-06	0.000148847	yes
Unigene0017613	5.5	34	0.21315	1.2873	2.59441	0.000725504	0.0223318	yes
Unigene0017756	14	54	0.39085	1.4617	1.90296	0.000129296	0.0055295	yes
Unigene0017845	21	0	0.69435	0.001	-9.43952	2.96852e-06	0.000207637	yes
Unigene0017960	0	11.5	0.001	0.54925	9.10132	0.00145498	0.0385398	yes
Unigene0018156	11	0	0.457	0.001	-8.83605	0.00195494	0.0487602	yes
Unigene0018178	9	47	0.2347	1.19065	2.34286	2.39453e-05	0.00128913	yes
Unigene0018190	0	15	0.001	0.3352	8.38888	0.000173536	0.00702597	yes
Unigene0018227	1	17.5	0.0288	0.49245	4.09584	0.000750948	0.0230057	yes
Unigene0018231	0	74.5	0.001	1.8933	10.8867	2.5911e-08	2.95883e-06	yes
Unigene0018289	45	13	3.5354	0.98805	-1.83922	0.000389263	0.0135704	yes
Unigene0018373	95.5	213	2.33125	5.0635	1.11903	0.000261708	0.00976459	yes
Unigene0018383	51	747	0.9279	13.182	3.82846	2.67679e-62	2.9283e-58	yes
Unigene0018408	15.5	0	0.68595	0.001	-9.42196	0.000163373	0.00668469	yes
Unigene0018493	806.5	290.5	5.8575	2.0402	-1.52157	1.68291e-17	7.86769e-15	yes
Unigene0018529	154.5	378.5	3.60465	8.5736	1.25004	4.65151e-08	4.9986e-06	yes
Unigene0018585	1190	462	19.804	7.4495	-1.41058	6.17175e-22	4.21978e-19	yes
Unigene0018586	1	37	0.02255	0.8164	5.17808	1.16441e-06	9.0214e-05	yes
Unigene0018639	52	140.5	1.435	3.79325	1.40238	0.00143534	0.0381303	yes
Unigene0018735	27.5	119	0.62295	2.61555	2.06993	1.21871e-08	1.50476e-06	yes
Unigene0018738	44	190.5	1.22535	5.22225	2.09148	0.000293192	0.0107487	yes
Unigene0018742	3	33.5	0.09725	1.0547	3.43899	8.80296e-06	0.000533819	yes
Unigene0018745	31.5	96.5	0.7088	2.104	1.56968	0.000802754	0.0241258	yes
Unigene0018771	92	7	2.54535	0.18775	-3.76098	3.21569e-14	1.0925e-11	yes
Unigene0018807	148	57	3.1503	1.17995	-1.41676	0.000454657	0.0153322	yes
Unigene0018853	82	36	0.87625	0.37295	-1.23236	0.000971207	0.0280926	yes
Unigene0018936	0.5	72.5	0.01245	1.8022	7.17747	0.000135537	0.00572036	yes
Unigene0018937	0	41.5	0.001	1.6091	10.652	0.000392622	0.0136353	yes
Unigene0018989	19	77	0.25975	1.0208	1.9745	1.18354e-05	0.000690897	yes
Unigene0019052	15.5	57	0.16265	0.58095	1.83664	0.000171341	0.00694738	yes
Unigene0019204	95.5	7	1.1978	0.08595	-3.80075	4.94345e-11	9.94106e-09	yes
Unigene0019205	0	30.5	0.001	0.75845	9.56691	0.000921387	0.0269758	yes
Unigene0019206	66.5	22	1.9353	0.62035	-1.6414	0.000157189	0.00646946	yes
Unigene0019231	35	126.5	0.4059	1.41615	1.80278	3.06694e-06	0.000213158	yes
Unigene0019239	151.5	617.5	1.4079	5.63295	2.00035	1.78957e-06	0.000132816	yes
Unigene0019243	15	93	0.2083	1.2594	2.596	6.46558e-07	5.30217e-05	yes
Unigene0019251	25.5	88.5	0.4128	1.38305	1.74434	9.88078e-05	0.00436558	yes
Unigene0019321	38	3	0.8748	0.0674	-3.69813	2.10229e-05	0.00115538	yes
Unigene0019451	0	33.5	0.001	1.7668	10.7869	0.000710027	0.0219294	yes
Unigene0019507	2282	1021.5	109.732	47.7478	-1.20048	6.56088e-11	1.27258e-08	yes
Unigene0019544	134	48	1.27865	0.4445	-1.52437	4.6858e-05	0.00230489	yes
Unigene0019564	153.5	527	3.68835	12.2688	1.73395	1.83158e-09	2.67872e-07	yes
Unigene0019612	235.5	42.5	2.15015	0.36975	-2.53982	4.68385e-06	0.000309004	yes
Unigene0019627	14.5	0	0.544	0.001	-9.08746	0.000167208	0.00681516	yes
Unigene0019644	0	85	0.001	1.7977	10.8119	7.92024e-05	0.00362225	yes
Unigene0019673	33.5	7.5	0.8275	0.17955	-2.20437	0.00188287	0.047373	yes
Unigene0019678	0.5	56	0.0065	0.72425	6.7999	0.000649518	0.0203946	yes
Unigene0019696	129.5	35	2.73465	0.71845	-1.9284	1.1498e-05	0.000673534	yes
Unigene0019706	54	4127.5	0.836	63.1104	6.23823	4.59125e-17	2.04173e-14	yes
Unigene0019740	0	31	0.001	1.3139	10.3596	0.000865355	0.0256132	yes
Unigene0019773	13.5	268.5	0.35785	6.8796	4.2649	1.02181e-31	1.59689e-28	yes
Unigene0019828	1539.5	701	17.2571	7.62615	-1.17817	2.11272e-10	3.73986e-08	yes
Unigene0019849	158	363	4.64985	10.3081	1.14852	1.83642e-05	0.00102708	yes
Unigene0019870	26.5	1.5	0.7253	0.0408	-4.15194	5.24134e-05	0.0025461	yes
Unigene0019888	61	23.5	1.5439	0.5749	-1.4252	0.00119465	0.0332882	yes
Unigene0019939	29.5	78	0.60185	1.54315	1.3584	0.000522403	0.0171618	yes
Unigene0019952	0.5	15.5	0.01225	0.36455	4.89526	0.00141393	0.0377081	yes
Unigene0020013	33	166	0.4974	2.4571	2.30448	7.51882e-05	0.00345891	yes
Unigene0020043	1	56.5	0.0166	0.93665	5.81825	0.00167059	0.043266	yes
Unigene0020094	4	37.5	0.0883	0.8067	3.19155	2.67021e-05	0.00141939	yes
Unigene0020158	20	1	0.9682	0.0458	-4.40189	0.00053374	0.0174713	yes
Unigene0020161	80.5	27	1.00385	0.3294	-1.60763	0.00096765	0.0280193	yes
Unigene0020187	0	35	0.001	1.01925	9.99329	0.000616968	0.0195634	yes
Unigene0020205	90	28	1.68435	0.5056	-1.73612	4.75041e-05	0.0023283	yes
Unigene0020222	63	333	1.0376	5.3045	2.35397	1.07059e-14	3.90395e-12	yes
Unigene0020246	1	29	0.0234	0.6584	4.81438	2.76061e-06	0.000194337	yes
Unigene0020274	0	189.5	0.001	3.1933	11.6408	1.28504e-22	1.07332e-19	yes
Unigene0020306	104.5	39.5	2.6013	0.9489	-1.4549	8.95242e-05	0.00401376	yes
Unigene0020315	5	46.5	0.1284	1.1611	3.17678	4.34564e-07	3.71402e-05	yes
Unigene0020363	3	175.5	0.1002	5.7958	5.85405	6.10332e-11	1.19228e-08	yes
Unigene0020427	0	46	0.001	3.7396	11.8687	4.27801e-07	3.66195e-05	yes
Unigene0020428	0	41.5	0.001	0.8984	9.81121	1.7415e-07	1.64804e-05	yes
Unigene0020445	40.5	660.5	0.9908	15.8616	4.00081	1.29706e-17	6.2234e-15	yes
Unigene0020492	25	1	0.51795	0.01955	-4.72757	9.49012e-05	0.00421682	yes
Unigene0020616	0	25.5	0.001	0.52345	9.03191	0.00161413	0.0420627	yes
Unigene0020620	40.5	5.5	0.80155	0.10725	-2.90181	4.33204e-05	0.00216199	yes
Unigene0020661	1	19	0.0376	0.70035	4.21927	0.00158908	0.0414891	yes
Unigene0020665	57	180.5	1.1663	3.58045	1.6182	4.94905e-08	5.28717e-06	yes
Unigene0020670	118.5	351.5	1.7643	5.07755	1.52504	9.03953e-11	1.71682e-08	yes
Unigene0020693	155.5	32	2.35905	0.47175	-2.32211	2.80343e-08	3.18137e-06	yes
Unigene0020723	3559.5	10073	127.444	349.165	1.45405	1.26182e-46	6.90188e-43	yes
Unigene0020769	55.5	13.5	1.9588	0.45755	-2.09797	0.000178898	0.00720043	yes
Unigene0020813	34	863	0.6413	16.0673	4.64698	1.56013e-12	3.98765e-10	yes
Unigene0020821	46.5	115	0.8216	1.96365	1.25703	0.000310759	0.0112569	yes
Unigene0020870	0	27.5	0.001	0.82255	9.68396	0.00123486	0.034164	yes
Unigene0020901	1	36	0.0222	0.7697	5.11566	5.75163e-07	4.7812e-05	yes
Unigene0020929	67	204.5	0.5536	1.63215	1.55986	2.92362e-07	2.63888e-05	yes
Unigene0020983	2404.5	682.5	29.6867	8.16505	-1.86228	6.53502e-27	7.77071e-24	yes
Unigene0021007	2907.5	1226.5	28.3583	11.6171	-1.28752	5.78279e-23	5.10173e-20	yes
Unigene0021068	7	38.5	0.31485	1.68545	2.4204	0.000356217	0.0125543	yes
Unigene0021070	1.5	160.5	0.0225	2.39865	6.73615	0.000257934	0.00964352	yes
Unigene0021072	264	117.5	5.16205	2.24315	-1.20242	0.000384902	0.0134354	yes
Unigene0021156	1	96.5	0.01295	1.2129	6.54936	7.86836e-19	4.17848e-16	yes
Unigene0021203	0	27.5	0.001	0.57405	9.16503	0.0012351	0.034164	yes
Unigene0021213	49	146.5	1.38345	4.0146	1.53699	6.69072e-06	0.000419208	yes
Unigene0021237	18	1	0.55465	0.02915	-4.25001	0.0010962	0.0310672	yes
Unigene0021239	34	2.5	0.94665	0.06645	-3.83249	2.17695e-06	0.000158345	yes
Unigene0021329	2	29	0.09385	1.3277	3.82243	3.85286e-05	0.00195677	yes
Unigene0021359	1744.5	5085.5	22.2055	62.7054	1.49767	1.19229e-40	3.10553e-37	yes
Unigene0021366	91	362	1.1589	4.46475	1.94582	4.19546e-14	1.38243e-11	yes
Unigene0021377	0	36	0.001	0.72475	9.50134	0.0005772	0.0185733	yes
Unigene0021398	63.5	21.5	2.4819	0.80975	-1.6159	0.000774132	0.0235891	yes
Unigene0021407	20	87.5	0.42445	1.81625	2.0973	0.000181426	0.00727006	yes
Unigene0021445	643	325.5	9.1434	4.47205	-1.03179	8.14878e-07	6.53551e-05	yes
Unigene0021490	27.5	313	0.43775	4.8271	3.46298	7.41339e-30	1.0671e-26	yes
Unigene0021506	48	8	1.41955	0.23375	-2.6024	0.000230277	0.00878154	yes
Unigene0021558	516	231	11.8968	5.19695	-1.19483	9.88393e-06	0.000587643	yes
Unigene0021567	7.5	40	0.25995	1.3437	2.36991	0.000402598	0.0138936	yes
Unigene0021608	39.5	4	0.6795	0.06665	-3.3498	5.71427e-06	0.000365994	yes
Unigene0021618	234.5	537.5	6.28195	14.0174	1.15793	2.63678e-06	0.000186581	yes
Unigene0021619	440	118.5	10.6094	2.7695	-1.93765	1.1656e-18	6.01473e-16	yes
Unigene0021652	0	15.5	0.001	0.65005	9.34441	0.000975787	0.0281953	yes
Unigene0021694	14	60.5	0.56565	2.38275	2.07465	6.65406e-05	0.00312952	yes
Unigene0021728	0	12.5	0.001	0.61965	9.27531	0.000702219	0.0217374	yes
Unigene0021751	20.5	3	0.4968	0.07115	-2.80373	0.00197519	0.0491087	yes
Unigene0021761	4	61.5	0.10965	1.66945	3.9284	0.000138991	0.00582568	yes
Unigene0021820	0	12	0.001	0.5147	9.00759	0.00180015	0.0455942	yes
Unigene0021845	8	48	0.2847	1.67805	2.55927	0.000611757	0.0194433	yes
Unigene0021874	32	6	0.8303	0.1508	-2.461	0.000500566	0.0165314	yes
Unigene0021916	0	30	0.001	1.13425	10.1475	2.24459e-05	0.00122285	yes
Unigene0021933	16	57	0.2422	0.83375	1.78342	0.000667822	0.0208973	yes
Unigene0021940	86	34.5	3.4724	1.3409	-1.37273	0.00151859	0.0400866	yes
Unigene0021942	5594	2824	104.551	51.0819	-1.03332	1.08413e-11	2.42039e-09	yes
Unigene0021980	78	20.5	1.4024	0.35765	-1.97128	4.21794e-05	0.00211082	yes
Unigene0021996	0	19.5	0.001	0.7071	9.46577	1.10533e-05	0.000649402	yes
Unigene0022021	143	373	2.4402	6.16675	1.33751	6.18759e-09	8.15539e-07	yes
Unigene0022022	207.5	73.5	6.13605	2.11765	-1.53485	1.1795e-06	9.11199e-05	yes
Unigene0022033	204.5	105	5.64865	2.8145	-1.00503	0.000127043	0.00544167	yes
Unigene0022059	46	139	2.3869	6.98115	1.54833	1.02879e-05	0.000609673	yes
Unigene0022114	54.5	16	1.28615	0.36455	-1.81887	0.000690465	0.0214464	yes
Unigene0022120	4288	1979.5	65.3026	29.1099	-1.16563	2.17166e-16	8.93123e-14	yes
Unigene0022121	107	28.5	1.3949	0.35995	-1.95429	2.43602e-07	2.22447e-05	yes
Unigene0022127	69.5	23	1.5604	0.5027	-1.63415	0.000248895	0.00938551	yes
Unigene0022133	700	306	14.2925	6.06025	-1.2378	1.54413e-12	3.96529e-10	yes
Unigene0022154	0	35.5	0.001	1.20275	10.2321	0.000595244	0.0189988	yes
Unigene0022169	523.5	2292	9.3584	40.1857	2.10235	6.26974e-10	1.01462e-07	yes
Unigene0022256	229.5	82.5	1.8534	0.64425	-1.52448	4.90194e-06	0.00032188	yes
Unigene0022294	779	196	11.6776	2.854	-2.03269	1.06645e-18	5.55549e-16	yes
Unigene0022302	209	70.5	5.96225	1.93865	-1.6208	1.33392e-07	1.30291e-05	yes
Unigene0022330	1972	5778.5	27.3712	77.6938	1.50514	4.88499e-34	8.90665e-31	yes
Unigene0022334	2.5	27.5	0.0542	0.57795	3.41458	0.000242279	0.00915839	yes
Unigene0022335	1	20.5	0.0209	0.41585	4.31449	0.00015848	0.00650793	yes
Unigene0022385	34.5	107	0.774	2.3299	1.58986	9.19167e-06	0.000553098	yes
Unigene0022389	0	48	0.001	0.8106	9.66285	4.70091e-11	9.52335e-09	yes
Unigene0022417	7	72	0.11085	1.1194	3.33604	0.00101556	0.0291904	yes
Unigene0022463	0	43.5	0.001	0.8625	9.75238	0.000353788	0.0124999	yes
Unigene0022559	56	11	2.9812	0.56025	-2.41175	0.000197235	0.00776875	yes
Unigene0022615	335	153.5	6.83835	3.0385	-1.17029	2.29362e-07	2.11206e-05	yes
Unigene0022636	1015.5	467	24.4375	10.8949	-1.16544	1.15209e-12	3.0443e-10	yes
Unigene0022657	366	787	3.4582	7.239	1.06577	6.89853e-07	5.63188e-05	yes
Unigene0022678	0	53.5	0.001	1.0258	10.0025	0.000210561	0.00817986	yes
Unigene0022701	94.5	14	2.15175	0.3055	-2.81627	1.31107e-08	1.61387e-06	yes
Unigene0022704	0	44	0.001	2.00275	10.9678	0.000337171	0.0120147	yes
Unigene0022705	0	69	0.001	3.3834	11.7243	0.000120674	0.00520553	yes
Unigene0022731	539.5	257	21.0802	9.72385	-1.11629	2.36909e-07	2.17325e-05	yes
Unigene0022742	239.5	1211	7.14995	35.1241	2.29646	1.87757e-37	4.10797e-34	yes
Unigene0022800	163.5	64.5	4.44685	1.7032	-1.38454	2.97874e-06	0.000208085	yes
Unigene0022805	30	194	0.74975	4.68075	2.64226	2.11915e-08	2.4715e-06	yes
Unigene0022814	31.5	2.5	1.357	0.10165	-3.73874	4.26951e-05	0.00213468	yes
Unigene0022819	66.5	26	1.0236	0.38945	-1.39414	0.00121331	0.0336882	yes
Unigene0022828	150	46.5	1.74375	0.51985	-1.74603	7.80041e-05	0.00357642	yes
Unigene0022845	158.5	379	1.70945	3.98095	1.21958	6.10923e-06	0.000387525	yes
Unigene0022921	0	36	0.001	0.8664	9.75889	0.000577254	0.0185733	yes
Unigene0022927	290.5	118.5	9.36835	3.7285	-1.3292	3.89804e-05	0.00197421	yes
Unigene0022931	13	47.5	0.227	0.805	1.8263	0.000347643	0.0123236	yes
Unigene0022957	195	406.5	14.2899	28.9	1.01607	0.000110361	0.00482922	yes
Unigene0022960	76	27.5	1.3286	0.4647	-1.51554	0.000471563	0.0158049	yes
Unigene0023027	189.5	520.5	2.74685	7.3064	1.41138	1.56801e-12	3.98915e-10	yes
Unigene0023047	236	93.5	3.51505	1.3595	-1.37047	9.21783e-05	0.00411254	yes
Unigene0023056	165	50	4.27285	1.26825	-1.75236	2.83998e-05	0.00149367	yes
Unigene0023060	7	94.5	0.2215	2.89525	3.70831	7.01544e-11	1.34642e-08	yes
Unigene0023203	171	67	6.5332	2.4847	-1.39472	1.70263e-06	0.000126708	yes
Unigene0023260	67	18	0.73405	0.1933	-1.92504	0.000294212	0.0107644	yes
Unigene0023270	44	8.5	0.93965	0.1764	-2.41327	5.07206e-05	0.00247265	yes
Unigene0023305	69.5	248.5	0.93255	3.24315	1.79814	1.42552e-09	2.15396e-07	yes
Unigene0023356	260.5	79.5	1.61505	0.47805	-1.75635	3.39999e-08	3.77993e-06	yes
Unigene0023400	249.5	122.5	3.61015	1.7246	-1.0658	0.00119689	0.0333337	yes
Unigene0023436	75.5	27.5	2.6495	0.93325	-1.50538	0.000206413	0.00804733	yes
Unigene0023453	264.5	81.5	4.0666	1.2182	-1.73907	2.38998e-08	2.76379e-06	yes
Unigene0023456	41	141.5	1.20565	4.0239	1.73878	8.30562e-05	0.00376077	yes
Unigene0023462	127	55.5	3.17585	1.3475	-1.23686	0.000135263	0.00571323	yes
Unigene0023463	91	32.5	3.855	1.33095	-1.53427	4.61291e-05	0.00227929	yes
Unigene0023468	0	30.5	0.001	1.0935	10.0947	0.000921749	0.0269758	yes
Unigene0023523	0	174.5	0.001	3.49495	11.7711	1.55024e-22	1.24699e-19	yes
Unigene0023575	108	54.5	1.9067	0.9334	-1.03051	0.00183006	0.0462358	yes
Unigene0023589	0	42	0.001	1.66765	10.7036	0.000134269	0.00567999	yes
Unigene0023622	61	10	2.4044	0.38615	-2.63844	1.34569e-06	0.000102089	yes
Unigene0023636	0	43	0.001	2.2793	11.1544	0.000363704	0.0127935	yes
Unigene0023656	191	82	2.21425	0.91635	-1.27285	3.41551e-05	0.0017583	yes
Unigene0023748	560.5	88	11.9411	1.8134	-2.71916	2.87402e-19	1.57203e-16	yes
Unigene0023778	278.5	1131	3.72725	14.6674	1.97642	1.13511e-21	7.57171e-19	yes
Unigene0023844	44.5	133.5	1.57465	4.5911	1.54381	0.000230383	0.00878154	yes
Unigene0023911	27	107.5	0.33375	1.30755	1.97003	0.00186117	0.0469135	yes
Unigene0023923	5	211	0.1099	4.57175	5.37848	3.41658e-09	4.73114e-07	yes
Unigene0023952	318.5	668	4.63125	9.45655	1.02991	0.000395877	0.0137309	yes
Unigene0023997	70.5	21.5	0.8954	0.2663	-1.74948	0.000597014	0.0190411	yes
Unigene0024048	59.5	11	0.82085	0.14835	-2.46811	2.57898e-05	0.00137759	yes
Unigene0024075	128.5	43.5	1.4313	0.46465	-1.62311	0.000219092	0.00845128	yes
Unigene0024086	59.5	243	0.7129	2.8314	1.98974	1.53275e-09	2.28442e-07	yes
Unigene0024097	37.5	6.5	0.81765	0.13625	-2.58523	0.000486066	0.0161819	yes
Unigene0024155	46	120.5	0.79225	2.02405	1.35322	0.000456493	0.0153752	yes
Unigene0024180	936.5	367	23.1538	8.7551	-1.40306	8.39651e-10	1.31597e-07	yes
Unigene0024191	140	50.5	1.6629	0.5797	-1.52032	5.56019e-06	0.000358578	yes
Unigene0024206	74.5	27.5	1.5826	0.5629	-1.49135	0.000421495	0.0143939	yes
Unigene0024229	22	96.5	0.2194	0.9308	2.08491	1.51613e-05	0.000864746	yes
Unigene0024231	199	83.5	2.04925	0.8379	-1.29025	8.43797e-05	0.00381274	yes
Unigene0024280	124	4642	3.0128	110.968	5.20289	6.58368e-23	5.7161e-20	yes
Unigene0024295	156.5	641.5	4.09875	16.4874	2.00811	2.02007e-06	0.000148115	yes
Unigene0024297	69	24	1.25665	0.42335	-1.56966	0.000919884	0.0269758	yes
Unigene0024324	415	200.5	9.8071	4.58485	-1.09695	3.13948e-07	2.81514e-05	yes
Unigene0024349	0	54	0.001	1.65785	10.6951	0.000206009	0.00803729	yes
Unigene0024396	0	117	0.001	2.383	11.2186	4.56188e-05	0.00226019	yes
Unigene0024467	79	193.5	0.91665	2.1659	1.24052	8.12187e-05	0.00370208	yes
Unigene0024478	150.5	56	1.5798	0.5682	-1.47527	2.32619e-06	0.000167419	yes
Unigene0024537	71.5	22.5	1.9149	0.58185	-1.71855	0.000706073	0.0218443	yes
Unigene0024547	604	2194	15.1778	53.5969	1.82018	1.37685e-24	1.42096e-21	yes
Unigene0024577	124	290.5	2.64455	5.98145	1.17747	0.000446512	0.0150948	yes
Unigene0024616	2	25.5	0.05125	0.6301	3.61996	0.000410202	0.0140937	yes
Unigene0024629	136	56	4.0886	1.6192	-1.33633	0.000358092	0.0126042	yes
Unigene0024648	448.5	1234.5	3.8474	10.255	1.41437	3.06093e-22	2.23236e-19	yes
Unigene0024658	304.5	122.5	1.8501	0.72155	-1.35843	1.02048e-08	1.28614e-06	yes
Unigene0024667	0	32	0.001	0.59715	9.22195	0.00078556	0.0237789	yes
Unigene0024698	20	63.5	0.4319	1.33035	1.62304	0.000400602	0.0138497	yes
Unigene0024699	27	82.5	0.36375	1.08355	1.57475	0.000314966	0.0113791	yes
Unigene0024727	141.5	43	2.87985	0.84895	-1.76224	1.25253e-06	9.5954e-05	yes
Unigene0024728	191	57	4.3473	1.2697	-1.77563	6.80663e-06	0.00042501	yes
Unigene0024734	0	58	0.001	0.96665	9.91685	1.93109e-06	0.000141781	yes
Unigene0024813	195	1081.5	4.49135	24.4822	2.44651	1.80009e-08	2.15452e-06	yes
Unigene0024818	403	199.5	7.14035	3.427	-1.05905	7.10351e-05	0.00329837	yes
Unigene0024838	985.5	367.5	36.7445	13.3021	-1.46587	1.18971e-10	2.19107e-08	yes
Unigene0024907	120.5	39.5	3.48145	1.107	-1.65303	5.67504e-06	0.000364335	yes
Unigene0024914	5	93	0.085	1.55125	4.18982	9.99572e-06	0.000593262	yes
Unigene0024915	35.5	136.5	1.3253	4.928	1.89468	3.16908e-08	3.5521e-06	yes
Unigene0024940	191	400	4.6936	9.50595	1.01814	8.21626e-05	0.00372957	yes
Unigene0024962	72.5	23	1.38415	0.4251	-1.70313	5.77993e-05	0.00276597	yes
Unigene0024966	29	4	0.79675	0.1052	-2.92099	0.000197848	0.00776875	yes
Unigene0025065	0	117.5	0.001	4.12095	12.0088	4.52792e-05	0.0022454	yes
Unigene0025078	15	90	0.17105	1.0005	2.54823	1.1063e-07	1.10023e-05	yes
Unigene0025088	121	37	1.9997	0.58355	-1.77686	0.00130555	0.035581	yes
Unigene0025108	158.5	47	2.52295	0.7257	-1.79767	1.23635e-05	0.000717896	yes
Unigene0025137	460	130	8.69905	2.37015	-1.87588	1.30699e-13	4.06192e-11	yes
Unigene0025139	413.5	157	7.26575	2.6699	-1.44433	1.49391e-11	3.22979e-09	yes
Unigene0025188	47.5	135	0.52455	1.4469	1.46381	9.8967e-05	0.00436908	yes
Unigene0025280	1459.5	634.5	19.9562	8.3809	-1.25166	5.27947e-14	1.69869e-11	yes
Unigene0025297	16.5	58.5	0.288	0.9889	1.77976	0.000154561	0.00638534	yes
Unigene0025318	192	61.5	1.3777	0.4269	-1.69029	5.94977e-07	4.91602e-05	yes
Unigene0025331	1042.5	503	18.9056	8.79185	-1.10457	4.02337e-05	0.0020283	yes
Unigene0025344	58.5	201.5	1.3577	4.5693	1.75081	2.33825e-05	0.00126132	yes
Unigene0025369	594	168.5	10.3053	2.8396	-1.85963	2.03203e-14	7.21741e-12	yes
Unigene0025447	2	381.5	0.03315	6.1957	7.54611	4.54895e-22	3.1496e-19	yes
Unigene0025450	9019	4316	144.856	67.1332	-1.10952	9.00527e-24	8.64158e-21	yes
Unigene0025474	228.5	778.5	2.37025	7.84165	1.72612	3.25054e-17	1.46941e-14	yes
Unigene0025499	244	728.5	4.85575	13.9925	1.52689	1.07057e-12	2.88464e-10	yes
Unigene0025509	573.5	244.5	9.14105	3.76465	-1.27984	9.13827e-10	1.41599e-07	yes
Unigene0025610	238.5	113.5	24.2703	11.1769	-1.11866	0.00012406	0.00534316	yes
Unigene0025623	75.5	159	0.58615	1.1915	1.02344	0.00177846	0.0452037	yes
Unigene0025627	42	184.5	0.88515	3.7734	2.09187	2.99313e-11	6.29685e-09	yes
Unigene0025646	211	104	4.6188	2.2114	-1.06256	0.000170498	0.00692345	yes
Unigene0025661	116.5	40.5	1.44835	0.4906	-1.56179	5.18595e-05	0.00252143	yes
Unigene0025668	220	102	3.80825	1.70945	-1.1556	6.1142e-06	0.000387525	yes
Unigene0025693	1338.5	558.5	27.4495	11.0898	-1.30755	1.09906e-13	3.43521e-11	yes
Unigene0025699	131	19.5	3.57795	0.5145	-2.79789	7.16352e-13	1.9494e-10	yes
Unigene0025759	245.5	48	5.47355	1.035	-2.40285	8.96643e-17	3.83161e-14	yes
Unigene0025799	457.5	217	12.5528	5.7689	-1.12164	3.69575e-08	4.05924e-06	yes
Unigene0025813	20	67	0.68605	2.23595	1.7045	0.000408606	0.0140591	yes
Unigene0025825	24.5	0.5	1.2684	0.0258	-5.61949	1.05885e-05	0.000624778	yes
Unigene0025835	1417.5	695.5	21.7889	10.357	-1.07298	1.47438e-11	3.20023e-09	yes
Unigene0025838	514.5	261	7.23395	3.5434	-1.02965	1.43162e-05	0.000819965	yes
Unigene0025854	1385.5	632.5	12.9456	5.7314	-1.1755	8.77831e-12	2.02597e-09	yes
Unigene0025875	131.5	430.5	1.42995	4.5616	1.67358	7.45764e-08	7.69656e-06	yes
Unigene0025877	2	42	0.03365	0.69735	4.3732	0.000412871	0.0141676	yes
Unigene0025897	659	274.5	6.9104	2.77555	-1.316	5.94861e-09	7.85935e-07	yes
Unigene0026025	91.5	38.5	7.1387	2.91915	-1.29011	0.00135471	0.0363591	yes
Unigene0026090	1557.5	424	29.0305	7.6284	-1.92812	6.42866e-22	4.34117e-19	yes
Unigene0026105	0	21	0.001	0.84105	9.71605	9.36975e-06	0.000561344	yes
Unigene0026129	203.5	101	3.85075	1.84975	-1.05781	0.000227712	0.00871008	yes
Unigene0026132	255.5	120	2.96505	1.35835	-1.1262	0.00022843	0.00873142	yes
Unigene0026163	4	33	0.0947	0.7578	3.00038	0.000582701	0.0186841	yes
Unigene0026199	0	59.5	0.001	1.34975	10.3985	0.000163396	0.00668469	yes
Unigene0026202	119	272.5	2.38905	5.3077	1.15165	1.18176e-05	0.000690597	yes
Unigene0026213	5	58.5	0.0492	0.55965	3.50779	1.83366e-08	2.1899e-06	yes
Unigene0026224	349.5	141.5	9.28505	3.6376	-1.35192	2.14198e-06	0.000156008	yes
Unigene0026229	0	11.5	0.001	0.4729	8.88539	0.00124578	0.0343283	yes
Unigene0026243	199.5	1687.5	2.391	19.5566	3.03197	7.11605e-68	9.73084e-64	yes
Unigene0026327	129.5	27.5	1.51745	0.31255	-2.27949	6.39305e-05	0.00301975	yes
Unigene0026334	53	527	0.7177	7.01505	3.289	5.34076e-11	1.07007e-08	yes
Unigene0026375	103.5	49.5	2.3087	1.06885	-1.11102	0.00118505	0.0331222	yes
Unigene0026405	531.5	217	10.5236	4.15415	-1.341	1.94137e-07	1.8152e-05	yes
Unigene0026411	155.5	40	1.73725	0.43375	-2.00187	3.73213e-07	3.26624e-05	yes
Unigene0026454	5.5	29	0.10465	0.53375	2.35059	0.000796809	0.0240208	yes
Unigene0026479	32.5	137	0.47365	1.95065	2.04206	1.81744e-06	0.00013452	yes
Unigene0026480	105	242.5	1.4687	3.28325	1.16058	4.45691e-06	0.000297661	yes
Unigene0026491	1238.5	6461.5	30.8482	158.179	2.3583	8.89966e-10	1.38294e-07	yes
Unigene0026532	111.5	48.5	1.61935	0.68215	-1.24725	0.000275933	0.0102149	yes
Unigene0026567	12.5	42	0.2681	0.8738	1.70453	0.00130788	0.0356266	yes
Unigene0026606	597	229.5	7.41285	2.76295	-1.42382	1.17253e-11	2.58609e-09	yes
Unigene0026607	167	54	5.5957	1.7752	-1.65634	0.00020251	0.0079234	yes
Unigene0026656	39.5	6.5	1.50365	0.24035	-2.64526	2.30861e-05	0.00124902	yes
Unigene0026689	253.5	105.5	3.43245	1.38365	-1.31076	3.02743e-05	0.00158312	yes
Unigene0026722	1532	639	16.1848	6.51915	-1.31188	1.39689e-10	2.52169e-08	yes
Unigene0026726	82	228.5	1.3092	3.5309	1.43135	3.72945e-05	0.00189938	yes
Unigene0026743	1983	709.5	27.1478	9.36005	-1.53625	1.31973e-10	2.39823e-08	yes
Unigene0026817	4846.5	17675.5	119.552	427.151	1.8371	1.24387e-10	2.28313e-08	yes
Unigene0026834	95	32.5	1.7971	0.5906	-1.60542	0.000480334	0.0160497	yes
Unigene0026859	833.5	418.5	6.7457	3.27455	-1.04267	6.86395e-10	1.09141e-07	yes
Unigene0026868	156	77	1.8013	0.86615	-1.05635	0.000950866	0.0276651	yes
Unigene0026966	1.5	30	0.1414	2.73865	4.27561	2.26355e-06	0.000163772	yes
Unigene0026967	30	82.5	1.40765	3.7484	1.41299	0.000563708	0.0182772	yes
Unigene0026968	752.5	1681.5	14.89	32.182	1.11191	7.70544e-15	2.84778e-12	yes
Unigene0027001	624	1571	12.5709	30.7021	1.28826	1.31446e-19	7.48942e-17	yes
Unigene0027059	126	42	2.3084	0.7449	-1.63177	1.77381e-05	0.000996137	yes
Unigene0027072	681	249	10.0619	3.56305	-1.49773	1.05326e-15	4.17471e-13	yes
Unigene0027088	0	64	0.001	1.33335	10.3808	0.000140376	0.00586905	yes
Unigene0027103	8.5	42.5	0.2106	1.0152	2.26919	0.000191892	0.0076279	yes
Unigene0027137	131.5	44	2.04685	0.66775	-1.61603	7.59019e-06	0.000469647	yes
Unigene0027144	422.5	899.5	11.7187	24.0473	1.03707	1.37871e-06	0.000104305	yes
Unigene0027176	184.5	52.5	1.84585	0.5089	-1.85883	1.08101e-05	0.000636281	yes
Unigene0027177	64	366.5	1.051	5.84285	2.47491	5.65249e-21	3.63741e-18	yes
Unigene0027187	561	1231.5	7.30725	15.5345	1.08808	7.52961e-10	1.19033e-07	yes
Unigene0027243	316	116	6.8113	2.43	-1.48697	0.000170755	0.00692876	yes
Unigene0027265	760	1897.5	9.2391	22.3589	1.27502	8.95268e-20	5.26552e-17	yes
Unigene0027297	81	28	0.94785	0.316	-1.58473	0.000207933	0.00810079	yes
Unigene0027334	606	1254	5.18015	10.3788	1.00258	5.6469e-12	1.33135e-09	yes
Unigene0027388	8933	20242	56.1014	123.284	1.13588	6.63055e-30	9.80211e-27	yes
Unigene0027403	77	33.5	1.2577	0.53185	-1.2417	0.00157395	0.0411726	yes
Unigene0027430	59.5	138	1.10385	2.4749	1.16483	0.000485519	0.0161735	yes
Unigene0027468	389.5	176	4.5878	2.0161	-1.18624	6.07788e-06	0.000386118	yes
Unigene0027491	160	63	1.93045	0.7406	-1.38217	3.34414e-05	0.00173054	yes
Unigene0027503	18	59.5	0.19145	0.6151	1.68385	0.000315635	0.0113904	yes
Unigene0027507	129.5	36.5	0.89615	0.2437	-1.87863	1.65095e-07	1.5815e-05	yes
Unigene0027579	9.5	42.5	0.33135	1.4378	2.11744	0.00189312	0.0475668	yes
Unigene0027585	570.5	275	17.1882	7.9723	-1.10835	4.32121e-05	0.00215855	yes
Unigene0027620	13	76.5	0.20485	1.16785	2.51122	3.79617e-07	3.30641e-05	yes
Unigene0027621	65	150.5	0.60305	1.35625	1.16927	0.000134203	0.00567999	yes
Unigene0027636	83	449	0.50655	2.6891	2.40835	7.14156e-06	0.000444067	yes
Unigene0027722	1	91	0.01375	1.22655	6.47903	5.46871e-12	1.29492e-09	yes
Unigene0027723	28	90.5	0.2819	0.8797	1.64183	0.000492175	0.0163355	yes
Unigene0027727	151.5	61.5	2.51605	0.9872	-1.34975	2.33262e-05	0.00126016	yes
Unigene0027731	107.5	267	1.5793	3.83455	1.27977	0.000455578	0.0153538	yes
Unigene0027742	10	68	0.1518	1.0041	2.72566	2.01011e-07	1.87626e-05	yes
Unigene0027759	99	22.5	1.533	0.34175	-2.16534	1.64829e-05	0.000931387	yes
Unigene0027856	202.5	72	4.2114	1.446	-1.54223	4.51012e-06	0.000300847	yes
Unigene0027870	41.5	109.5	0.5417	1.3904	1.35993	0.000556346	0.0180922	yes
Unigene0027895	402	202	1.9326	0.9437	-1.03414	9.75829e-06	0.000582071	yes
Unigene0027915	49	16	1.73695	0.54445	-1.67368	0.00177939	0.0452063	yes
Unigene0027942	728.5	362	9.57935	4.61885	-1.05239	1.10364e-09	1.68153e-07	yes
Unigene0027986	37.5	9	0.7841	0.18015	-2.12184	0.00191176	0.0479457	yes
Unigene0027997	6122.5	13110	246.836	510.681	1.04887	5.62124e-17	2.45977e-14	yes
Unigene0028033	8	54	0.1165	0.77335	2.73079	0.000168384	0.00685287	yes
Unigene0028034	1.5	28.5	0.03105	0.58095	4.22575	0.00030081	0.0109618	yes
Unigene0028063	301.5	135.5	5.4464	2.375	-1.19738	5.28062e-07	4.43006e-05	yes
Unigene0028106	14.5	0	0.6396	0.001	-9.32103	0.000174081	0.00704281	yes
Unigene0028171	215.5	48	1.3537	0.29035	-2.22104	3.48635e-09	4.79137e-07	yes
Unigene0028218	3692.5	1539.5	58.6371	23.7179	-1.30583	2.76785e-22	2.07391e-19	yes
Unigene0028259	4.5	43.5	0.10155	0.9582	3.23814	7.7793e-06	0.000480805	yes
Unigene0028262	31	99	0.3312	1.02595	1.63119	9.94506e-05	0.00438689	yes
Unigene0028297	581.5	245	4.5618	1.86075	-1.29372	1.9817e-08	2.34621e-06	yes
Unigene0028327	153.5	20.5	2.0955	0.26895	-2.96188	2.96996e-12	7.22005e-10	yes
Unigene0028329	1216.5	435.5	24.6927	8.53795	-1.53212	9.1775e-11	1.73699e-08	yes
Unigene0028331	281.5	126	1.96155	0.853	-1.20138	1.15889e-06	8.99135e-05	yes
Unigene0028459	30.5	81.5	0.4726	1.2229	1.37161	0.00168462	0.043547	yes
Unigene0028532	261	2615	1.79855	17.4569	3.2789	9.96835e-83	2.72624e-78	yes
Unigene0028579	26.5	3.5	1.3197	0.17115	-2.94688	0.0010774	0.0306934	yes
Unigene0028580	261.5	78	2.7127	0.78395	-1.7909	7.00517e-11	1.34642e-08	yes
Unigene0028604	120	58.5	1.18225	0.55615	-1.08799	0.0012065	0.0335441	yes
Unigene0028611	282.5	583.5	2.52725	5.07525	1.00591	3.25178e-06	0.000225147	yes
Unigene0028628	622.5	310	6.3561	3.0618	-1.05376	1.63022e-08	1.98155e-06	yes
Unigene0028657	458.5	186	5.92315	2.33225	-1.34464	1.65846e-09	2.44514e-07	yes
Unigene0028658	285	140.5	2.10585	1.0068	-1.06463	2.33381e-05	0.00126016	yes
Unigene0028690	58	267	1.5559	7.0691	2.18378	0.000793326	0.0239346	yes
Unigene0028726	418.5	962	4.3072	9.604	1.15689	2.73229e-13	8.16671e-11	yes
Unigene0028728	123.5	31	2.1679	0.5277	-2.03851	3.13331e-05	0.0016338	yes
Unigene0028748	172.5	64.5	2.2362	0.8028	-1.47794	0.000236494	0.00899565	yes
Unigene0028774	147.5	66.5	1.17105	0.5081	-1.20462	0.000543006	0.0177005	yes
Unigene0028799	277.5	108	5.9405	2.23155	-1.41254	2.42081e-06	0.00017309	yes
Unigene0028927	328	168.5	3.35745	1.6603	-1.01592	0.000551958	0.0179601	yes
Unigene0028960	115	41.5	1.23795	0.43135	-1.52102	8.77139e-05	0.00394229	yes
Unigene0029094	17.5	66.5	0.2528	0.9319	1.88218	0.000134266	0.00567999	yes
Unigene0029095	87.5	426	1.54735	7.2896	2.23604	3.8415e-20	2.33469e-17	yes
Unigene0029115	108	381	1.3463	4.6128	1.77664	7.73619e-13	2.09482e-10	yes
Unigene0029184	44.5	0	2.5617	0.001	-11.3229	8.58499e-05	0.00386487	yes
Unigene0029244	78	22	2.48165	0.6751	-1.87813	2.13448e-05	0.00116986	yes
Unigene0029269	6	64.5	0.08165	0.83845	3.3602	3.37087e-06	0.000232803	yes
Unigene0029281	119	21.5	1.17405	0.2049	-2.5185	8.58408e-10	1.3377e-07	yes
Unigene0029282	552	1197	6.27035	13.2121	1.07524	3.16953e-11	6.61706e-09	yes
Unigene0029283	244	697	3.8927	10.7479	1.46521	1.3979e-12	3.64107e-10	yes
Unigene0029291	59.5	126	1.2779	2.6252	1.03865	0.000943747	0.0275312	yes
Unigene0029333	8.5	93.5	0.09375	0.9987	3.41316	3.81287e-13	1.10347e-10	yes
Unigene0029336	15	444	0.2602	7.5397	4.85681	4.76945e-20	2.86681e-17	yes
Unigene0029343	45	5	1.69055	0.18505	-3.19151	4.0688e-06	0.000274083	yes
Unigene0029344	24.5	1	1.0622	0.0431	-4.62322	2.45902e-05	0.00132125	yes
Unigene0029351	58.5	20.5	1.73715	0.592	-1.55305	0.000575845	0.0185607	yes
Unigene0029364	2818.5	5914	27.1499	55.2574	1.02522	2.82427e-13	8.34351e-11	yes
Unigene0029367	947	456	10.8216	5.03975	-1.1025	6.77684e-12	1.5909e-09	yes
Unigene0029465	255.5	1919.5	2.06605	15.1876	2.87795	5.61229e-17	2.45977e-14	yes
Unigene0029484	230	64	4.5214	1.22405	-1.88511	2.26184e-10	3.97807e-08	yes
Unigene0029509	47	144	2.4175	7.1478	1.56398	0.000912345	0.0267866	yes
Unigene0029531	260.5	647.5	2.82685	6.843	1.27543	7.26302e-08	7.55272e-06	yes
Unigene0029538	99.5	215	0.71295	1.4967	1.06991	0.000182321	0.00730059	yes
Unigene0029550	344	176	3.6947	1.8299	-1.01369	4.40194e-05	0.00219287	yes
Unigene0029591	10.5	164	0.14975	2.30345	3.94317	3.88911e-09	5.3049e-07	yes
Unigene0029592	3	60.5	0.0908	1.80425	4.31256	0.000125154	0.00538181	yes
Unigene0029704	371.5	130.5	4.0808	1.39835	-1.54513	3.75289e-07	3.27916e-05	yes
Unigene0029734	101.5	37	1.2618	0.4464	-1.49907	5.28315e-05	0.00256186	yes
Unigene0029795	274	132	3.9308	1.83665	-1.09775	2.70504e-05	0.00143651	yes
Unigene0029824	1	40	0.1033	4.0997	5.31061	2.83706e-05	0.00149356	yes
Unigene0029825	3.5	197	0.10535	5.83965	5.79262	2.13366e-08	2.48313e-06	yes
Unigene0029833	852.5	386	3.9049	1.7076	-1.19332	3.76613e-10	6.29968e-08	yes
Unigene0029841	649.5	256	4.35565	1.666	-1.3865	3.74065e-09	5.11515e-07	yes
Unigene0029858	8999.5	19046	86.1602	176.844	1.03739	9.92778e-23	8.48484e-20	yes
Unigene0029945	159.5	51	1.4125	0.43625	-1.69502	3.97675e-05	0.00201035	yes
Unigene0029954	179	447	3.43075	8.3095	1.27624	1.5651e-09	2.31471e-07	yes
Unigene0030012	2	255	0.0133	1.65375	6.95817	1.38582e-26	1.54697e-23	yes
Unigene0030021	140	62.5	2.36705	1.0176	-1.21792	0.000409117	0.0140653	yes
Unigene0030023	119	51	2.5801	1.06385	-1.27813	0.00063763	0.0201021	yes
Unigene0030080	51.5	128.5	0.43415	1.0458	1.26834	0.00043078	0.0146626	yes
Unigene0030084	373	174.5	4.3365	1.9688	-1.13921	3.82879e-07	3.32424e-05	yes
Unigene0030118	0	123.5	0.001	1.60645	10.6497	4.64625e-06	0.000307304	yes
Unigene0030123	14	86	1.1175	6.6407	2.57106	3.0606e-08	3.44462e-06	yes
Unigene0030125	216.5	99	1.52065	0.6741	-1.17365	8.71552e-05	0.00392041	yes
Unigene0030155	106	435.5	1.06435	4.2346	1.99225	2.52564e-18	1.27914e-15	yes
Unigene0030162	271	1081	2.83955	11.0026	1.95412	8.31942e-28	1.08347e-24	yes
Unigene0030229	2640.5	776	39.8552	11.3561	-1.81129	3.7231e-39	8.85418e-36	yes
Unigene0030234	1	185.5	0.0194	3.56035	7.51982	3.16386e-06	0.000219337	yes
Unigene0030311	131	48.5	1.2316	0.44345	-1.47369	2.93887e-05	0.00154123	yes
Unigene0030408	69	226	0.8945	2.82905	1.66116	7.40248e-08	7.66858e-06	yes
Unigene0030502	1436.5	671.5	8.5206	3.85695	-1.14349	1.53088e-10	2.73647e-08	yes
Unigene0030511	49.5	137	0.5738	1.54355	1.42763	1.73891e-05	0.000977542	yes
Unigene0030540	3120	1257	20.5597	8.0031	-1.36119	1.45784e-22	1.19016e-19	yes
Unigene0030559	2	22	0.03965	0.4204	3.40637	0.000337978	0.0120356	yes
Unigene0030595	219.5	1150.5	2.3702	12.0389	2.34462	1.22064e-26	1.39097e-23	yes
Unigene0030646	10	85	0.1476	1.2105	3.03584	1.66444e-08	2.01419e-06	yes
Unigene0030669	195.5	64	1.8054	0.57155	-1.65937	1.15296e-08	1.43656e-06	yes
Unigene0030717	62.5	20.5	2.97135	0.9427	-1.65625	0.000253477	0.00950937	yes
Unigene0030734	7	299.5	0.08655	3.66985	5.40604	6.47838e-09	8.49771e-07	yes
Unigene0030801	156.5	75	0.97485	0.4541	-1.10217	0.000223044	0.00856747	yes
Unigene0030804	11158	4659.5	87.6322	35.3689	-1.30898	1.65058e-17	7.78305e-15	yes
Unigene0030808	4102	2106	46.4901	23.0897	-1.00968	9.48572e-15	3.48221e-12	yes
Unigene0030826	1.5	20.5	0.0864	1.13525	3.71583	0.000418532	0.0143378	yes
Unigene0030848	180	436.5	1.2514	2.93455	1.2296	3.95925e-08	4.30879e-06	yes
Unigene0030849	725.5	1535	11.4325	23.4559	1.03681	1.56577e-09	2.31471e-07	yes
Unigene0030867	133.5	40	1.1056	0.32315	-1.77455	5.02652e-06	0.000328876	yes
Unigene0030923	29.5	93	0.38705	1.17925	1.60728	0.000645269	0.0202728	yes
Unigene0030927	308.5	113.5	3.67485	1.30715	-1.49126	2.08346e-08	2.44552e-06	yes
Unigene0030949	3	159	0.03515	1.8464	5.71505	2.11631e-08	2.4715e-06	yes
Unigene0030964	11.5	0	0.70885	0.001	-9.46934	0.00155354	0.0407362	yes
Unigene0031031	517.5	2979	5.15445	28.7841	2.48138	8.14134e-49	4.94795e-45	yes
Unigene0031051	699.5	189.5	6.2575	1.6382	-1.93347	2.46579e-22	1.89963e-19	yes
Unigene0031108	111	42.5	8.99345	3.3454	-1.4267	0.00021743	0.00839902	yes
Unigene0031109	997.5	480.5	14.0317	6.5647	-1.09589	2.21701e-09	3.1745e-07	yes
Unigene0031194	659	230.5	5.9628	2.013	-1.56664	3.03196e-13	8.82138e-11	yes
Unigene0031213	624	231	5.8628	2.10855	-1.47534	3.9518e-09	5.377e-07	yes
Unigene0031286	66	269	0.6979	2.78385	1.99599	5.53774e-05	0.00266172	yes
Unigene0031439	49.5	199.5	0.88035	3.4408	1.96659	1.11246e-10	2.05609e-08	yes
Unigene0031460	48.5	107.5	0.7555	1.6258	1.10565	0.00126161	0.034712	yes
Unigene0031548	0	220	0.001	5.51815	12.43	2.31083e-24	2.29814e-21	yes
Unigene0031549	0	113	0.001	3.07145	11.5847	1.52786e-16	6.42852e-14	yes
Unigene0031644	45	196.5	0.5153	2.2029	2.09592	2.05744e-06	0.000150251	yes
Unigene0031669	785.5	332	6.91925	2.82415	-1.2928	1.02815e-11	2.32387e-09	yes
Unigene0031675	92	224	0.53915	1.27285	1.2393	0.000195124	0.00771722	yes
Unigene0031678	7	87	0.09255	1.1214	3.59892	5.98911e-11	1.17417e-08	yes
Unigene0031705	135	46	9.2068	3.0486	-1.59455	0.00012671	0.00543166	yes
Unigene0031706	392	156.5	8.406	3.2637	-1.36491	8.72544e-08	8.92083e-06	yes
Unigene0031751	1041.5	452	7.2003	3.0216	-1.25274	1.10436e-12	2.96108e-10	yes
Unigene0031769	20.5	110	0.2206	1.1673	2.40367	0.00182251	0.0460877	yes
Unigene0031874	1450	292	24.1354	4.715	-2.35582	2.65546e-45	1.2104e-41	yes
Unigene0031875	162	46.5	6.75515	1.8851	-1.84135	3.46267e-08	3.84181e-06	yes
Unigene0031981	1165.5	2890	8.5453	20.5933	1.26897	1.52956e-15	5.97599e-13	yes
Unigene0032009	395.5	172.5	5.95435	2.5118	-1.24522	1.31978e-08	1.6186e-06	yes
Unigene0032054	32	7	0.51375	0.1102	-2.22094	0.0012384	0.0341766	yes
Unigene0032095	3052.5	1572	36.0624	17.9731	-1.00466	6.40593e-17	2.78089e-14	yes
Unigene0032187	12.5	50.5	0.7335	2.8659	1.96612	0.000144359	0.00600012	yes
Unigene0032189	50.5	110	0.9451	1.98815	1.07289	0.00194707	0.048675	yes
Unigene0032212	102	272	1.37235	3.5237	1.36044	1.42579e-05	0.000817485	yes
Unigene0032222	146.5	55	1.6719	0.60845	-1.45828	2.69733e-06	0.000190372	yes
Unigene0032328	219	60.5	5.8917	1.56855	-1.90925	2.3124e-08	2.67973e-06	yes
Unigene0032329	218.5	81	13.1928	4.75515	-1.47219	6.52154e-05	0.00307513	yes
Unigene0032366	544	1636	7.55925	21.9916	1.54063	5.83066e-18	2.89932e-15	yes
Unigene0032369	7569.5	18639	99.129	236.224	1.25278	3.40352e-32	5.47547e-29	yes
Unigene0032379	0	14	0.001	0.65535	9.35612	0.000265418	0.0098828	yes
Unigene0032424	948	2163.5	6.5791	14.6857	1.15844	1.37861e-05	0.000792092	yes
Unigene0032427	30	204	0.2941	1.93905	2.72097	1.64896e-17	7.78305e-15	yes
Unigene0032560	177.5	426.5	1.41835	3.30735	1.22146	3.39587e-05	0.00175399	yes
Unigene0032561	522	261	4.5384	2.1892	-1.05178	4.97759e-06	0.000326065	yes
Unigene0032605	191.5	619	1.355	4.2468	1.64808	7.63714e-18	3.76339e-15	yes
Unigene0032608	52	168	0.55975	1.75505	1.64866	9.44922e-07	7.49063e-05	yes
Unigene0032614	338	811	3.049	7.08085	1.21559	1.15187e-12	3.0443e-10	yes
Unigene0032618	115	1088	2.01135	18.7609	3.22149	2.24937e-09	3.21243e-07	yes
Unigene0032706	2492.5	1176	35.4575	16.2248	-1.12788	1.82898e-18	9.34969e-16	yes
Unigene0032748	458	230	4.81305	2.33085	-1.0461	2.59695e-05	0.00138584	yes
Unigene0032783	115.5	251	2.2388	4.7435	1.08323	0.00129789	0.0354428	yes
Unigene0032887	71	192.5	0.6626	1.74735	1.39896	4.24774e-06	0.000284855	yes
Unigene0032902	459	190.5	3.99085	1.61	-1.30964	3.60265e-06	0.00024756	yes
Unigene0032928	140.5	55	2.9642	1.12525	-1.3974	0.000654105	0.0205033	yes
Unigene0032940	0	308	0.001	4.45055	12.1198	1.30807e-05	0.000757129	yes
Unigene0032952	795.5	346.5	9.15255	3.8509	-1.24898	2.72794e-10	4.64837e-08	yes
Unigene0032959	45.5	392	0.6574	5.58125	3.08574	9.82104e-07	7.69615e-05	yes
Unigene0032960	1	19	0.0535	1	4.22432	0.000797502	0.0240208	yes
Unigene0033110	1	17.5	0.03105	0.52485	4.07924	0.000578444	0.0185897	yes
Unigene0033129	21	87	0.18425	0.73465	1.99539	4.70234e-05	0.00230791	yes
Unigene0033132	179	84.5	2.0097	0.91895	-1.12892	0.00119049	0.0332232	yes
Unigene0033174	919.5	436.5	6.8456	3.14995	-1.11985	3.22635e-12	7.77423e-10	yes
Unigene0033312	115	24.5	2.96265	0.61095	-2.27776	3.71132e-07	3.25846e-05	yes
Unigene0033314	266	72	3.512	0.91905	-1.93408	7.9721e-12	1.85557e-09	yes
Unigene0033336	44	111.5	0.55755	1.37965	1.30713	0.00170036	0.0438294	yes
Unigene0033479	923.5	2428	8.29975	21.1173	1.34729	1.74602e-17	8.09354e-15	yes
Unigene0033481	1286.5	238	7.5935	1.3587	-2.48254	4.2859e-49	2.93038e-45	yes
Unigene0033541	0	139.5	0.001	1.67125	10.7067	1.97244e-09	2.8542e-07	yes
Unigene0033559	1947.5	827	21.687	8.91205	-1.283	1.02807e-17	5.02083e-15	yes
Unigene0033634	791	1738.5	5.38785	11.4596	1.08878	6.97091e-12	1.62947e-09	yes
Unigene0033648	44.5	203	0.46305	2.04185	2.14064	1.09673e-11	2.43858e-09	yes
Unigene0033665	105.5	30	1.13425	0.30975	-1.87256	8.97819e-05	0.0040211	yes
Unigene0033697	425	202	3.7783	1.7419	-1.11708	1.85846e-06	0.000136816	yes
Unigene0033748	6.5	29.5	0.2847	1.25125	2.13586	0.00163351	0.0424867	yes
Unigene0033790	244.5	111.5	2.7179	1.2051	-1.17334	1.53094e-05	0.000870472	yes
Unigene0033822	21.5	170.5	0.26695	2.0529	2.94302	7.22913e-17	3.11354e-14	yes
Unigene0033857	124	309	1.75385	4.2788	1.28668	0.00139743	0.0373315	yes
Unigene0033907	18	64	0.42035	1.4433	1.77971	0.000155146	0.00640465	yes
Unigene0033909	0.5	20	0.01865	0.72925	5.28917	0.000211639	0.0082159	yes
Unigene0033921	204	1045.5	1.54615	7.7016	2.31648	8.28129e-30	1.16146e-26	yes
Unigene0033943	193.5	96.5	1.32065	0.63985	-1.04544	0.000563493	0.0182772	yes
Unigene0034100	647	287	7.38045	3.1729	-1.21791	3.69252e-10	6.1955e-08	yes
Unigene0034125	25	2	0.77075	0.0582	-3.72717	0.000137984	0.00580128	yes
Unigene0034140	233.5	489.5	2.2368	4.537	1.0203	4.62639e-07	3.92332e-05	yes
Unigene0034171	954	481.5	6.1923	3.0086	-1.04138	5.26532e-06	0.000343269	yes
Unigene0034173	12	87.5	0.3766	2.6855	2.83409	2.72769e-07	2.47588e-05	yes
Unigene0034245	65.5	310	0.6266	2.9014	2.21113	7.18942e-08	7.49042e-06	yes
Unigene0034303	805.5	382.5	8.63195	3.97305	-1.11944	3.81536e-10	6.36258e-08	yes
Unigene0034449	0	50	0.001	0.97385	9.92756	0.000248974	0.00938551	yes
Unigene0034487	297.5	1238	3.07295	12.5277	2.02743	1.87477e-09	2.72729e-07	yes
Unigene0034604	55.5	180.5	0.75085	2.36965	1.65808	4.20344e-07	3.60942e-05	yes
Unigene0034643	0	32.5	0.001	0.33855	8.40323	5.4054e-06	0.000350721	yes
Unigene0034650	103	32	1.4423	0.4371	-1.72234	0.000354582	0.0125129	yes
Unigene0034685	3827.5	1416	34.4065	12.2808	-1.48628	4.32884e-17	1.94081e-14	yes
Unigene0034731	162	1047	1.57325	9.87435	2.64994	3.17273e-44	1.33494e-40	yes
Unigene0034734	20	87.5	1.00555	4.2528	2.08043	1.18798e-06	9.15215e-05	yes
Unigene0034737	2271	1020	16.6741	7.25135	-1.20128	7.41712e-08	7.66921e-06	yes
Unigene0034802	2	23	0.03495	0.38825	3.47362	0.000194722	0.00770687	yes
Unigene0034815	4	104	0.048	1.23685	4.68749	0.000187939	0.00749262	yes
Unigene0035073	1	847	0.01225	10.3486	9.72245	9.55916e-10	1.46873e-07	yes
Unigene0035128	39.5	7	1.2644	0.2163	-2.54735	6.16933e-05	0.00292926	yes
Unigene0035173	364.5	172	2.9937	1.36455	-1.1335	5.51854e-05	0.00265716	yes
Unigene0035185	744	285.5	4.52385	1.67605	-1.43249	2.32626e-12	5.78371e-10	yes
Unigene0035365	80.5	347	0.6943	2.9038	2.06431	3.27158e-14	1.10462e-11	yes
Unigene0035375	186	69.5	4.101	1.4779	-1.47243	2.29119e-06	0.000165117	yes
Unigene0035434	142.5	468.5	1.1755	3.7857	1.68729	9.79816e-06	0.000583812	yes
Unigene0035460	8.5	34.5	0.5153	2.03455	1.98123	0.00139577	0.0373146	yes
Unigene0035498	1065	401.5	9.53315	3.47285	-1.45683	4.07504e-13	1.17314e-10	yes
Unigene0035558	2550.5	950	27.6457	9.974	-1.47081	3.44084e-21	2.24056e-18	yes
Unigene0035611	3295	7600.5	53.3797	119.15	1.15842	2.45395e-23	2.23711e-20	yes
Unigene0035617	190	574	2.1842	6.40785	1.55274	3.34513e-14	1.12253e-11	yes
Unigene0035628	34.5	0	1.1165	0.001	-10.1248	0.000577735	0.0185779	yes
Unigene0035629	479	1270.5	4.14025	10.6455	1.36245	5.7913e-21	3.6834e-18	yes
Unigene0035720	1980.5	512.5	15.2879	3.81545	-2.00247	2.64413e-20	1.62504e-17	yes
Unigene0035912	2	26	0.09505	1.20055	3.65887	5.16445e-05	0.00251321	yes
Unigene0035973	878.5	1850	8.11555	16.5059	1.02423	5.95671e-11	1.17202e-08	yes
Unigene0035981	154.5	347	1.22665	2.66495	1.11938	6.93555e-06	0.000432074	yes
Unigene0036081	0	31	0.001	1.26775	10.3081	6.19561e-07	5.0884e-05	yes
Unigene0036123	207	1234.5	2.5708	14.8176	2.52702	6.68704e-44	2.61263e-40	yes
Unigene0036208	308	721	6.70365	15.2064	1.18166	8.55136e-12	1.98196e-09	yes
Unigene0036228	1	142.5	0.01175	1.67525	7.15557	0.000304657	0.0110799	yes
Unigene0036282	41	108.5	0.37675	0.96735	1.36043	8.03941e-05	0.00367112	yes
Unigene0036523	352.5	152	4.4193	1.8405	-1.26372	0.000140582	0.00586991	yes
Unigene0036536	49.5	156	0.94845	2.9096	1.61718	4.52431e-06	0.000301207	yes
Unigene0036562	37	106.5	0.49255	1.3745	1.48056	3.32381e-05	0.00172165	yes
Unigene0036577	178.5	75.5	2.7047	1.10725	-1.28849	0.00104558	0.0299429	yes
Unigene0036656	1103.5	2327	11.3849	23.3125	1.03398	2.55593e-14	8.79273e-12	yes
Unigene0036679	56.5	172.5	1.0996	3.2459	1.56164	1.37301e-06	0.000104018	yes
Unigene0036680	120.5	628.5	1.35405	6.84325	2.3374	8.13707e-28	1.08347e-24	yes
Unigene0036791	9220	4093.5	93.1482	40.0829	-1.21654	2.50359e-31	3.80393e-28	yes
Unigene0036830	31.5	138.5	0.50565	2.1734	2.10374	4.62567e-05	0.00228353	yes
Unigene0036857	4594.5	23272.5	87.2142	428.086	2.29527	6.15886e-41	1.68439e-37	yes
Unigene0036858	23.5	86	1.1602	4.11905	1.82794	1.52091e-05	0.000865666	yes
Unigene0037052	6.5	43.5	0.2715	1.75545	2.69282	3.05329e-05	0.00159512	yes
Unigene0037141	244.5	1125	3.9501	17.8313	2.17445	9.9292e-09	1.25429e-06	yes
Unigene0037188	191.5	402	4.77165	9.7082	1.02472	0.000192024	0.0076279	yes
Unigene0037238	2.5	24	0.2624	2.4659	3.23227	0.00128122	0.0351102	yes
Unigene0037304	1062.5	4342.5	5.8829	23.2413	1.98209	3.76247e-36	7.34999e-33	yes
Unigene0037429	612.5	293.5	4.2891	1.99465	-1.10454	1.71328e-09	2.51242e-07	yes
Unigene0037469	1	991	0.01085	10.6441	9.93815	1.03293e-10	1.94154e-08	yes
Unigene0037564	75	164.5	1.05535	2.2494	1.09182	0.000246784	0.00932225	yes
Unigene0037579	3506.5	9690	25.3682	67.8449	1.41922	1.27581e-38	2.90768e-35	yes
Unigene0037599	795	351	4.44255	1.89615	-1.22831	2.29189e-12	5.72429e-10	yes
Unigene0037607	71	278.5	0.78315	2.96375	1.92006	1.47958e-10	2.65344e-08	yes
Unigene0037612	21	1.5	1.8731	0.12635	-3.88993	0.000281192	0.0103643	yes
Unigene0037684	1	23	0.03695	0.81895	4.47013	3.6801e-05	0.00187775	yes
Unigene0037709	29027	65008.5	783.891	1711.43	1.12648	1.17236e-09	1.77633e-07	yes
Unigene0037843	287	1514	1.75575	8.98525	2.35547	2.20789e-45	1.09788e-41	yes
Unigene0037918	49	121.5	0.62575	1.5014	1.26265	0.000138236	0.00580741	yes
Unigene0037930	65	22.5	0.667	0.22175	-1.58875	0.00176689	0.0449931	yes
Unigene0037975	14.5	1270	0.11575	9.72855	6.39314	5.31207e-43	1.816e-39	yes
Unigene0038029	23.5	64.5	0.33735	0.89645	1.40998	0.00107927	0.0307309	yes
Unigene0038074	642	2481.5	4.1223	15.413	1.90262	1.85733e-41	5.64401e-38	yes
Unigene0038084	64	154.5	1.21445	2.83275	1.2219	0.000109515	0.00479605	yes
Unigene0038249	58	20	5.5273	1.83275	-1.59256	0.00123685	0.0341752	yes
Unigene0038255	449.5	212.5	6.3495	2.89705	-1.13206	5.15661e-06	0.000336583	yes
Unigene0038335	16.5	77	0.25095	1.13365	2.1755	7.08036e-07	5.75455e-05	yes
Unigene0038396	841.5	138.5	15.6509	2.5114	-2.63969	2.18071e-26	2.33884e-23	yes
Unigene0038419	2	1105	0.07285	39.3615	9.07764	2.64705e-42	8.51695e-39	yes
Unigene0038564	21	62.5	0.654	1.8757	1.52007	0.00126384	0.034721	yes
Unigene0038592	30.5	76	0.4907	1.1875	1.27501	0.00133338	0.0359967	yes
Unigene0038605	77	184	0.49085	1.13585	1.21042	2.00342e-05	0.00111252	yes
Unigene0038681	464	1115.5	3.30345	7.68345	1.21778	2.51311e-14	8.70014e-12	yes
Unigene0038703	10900.5	22785.5	828.382	1676.35	1.01696	1.21429e-27	1.54463e-24	yes
Unigene0038823	110	293.5	0.8571	2.2215	1.374	3.59799e-07	3.17937e-05	yes
Unigene0038831	72	181.5	0.4552	1.1139	1.29105	7.87698e-06	0.000484107	yes
Unigene0038924	638.5	264.5	8.0775	3.2393	-1.31823	4.22931e-09	5.6979e-07	yes
Unigene0039026	2	25.5	0.04945	0.6089	3.62216	9.20901e-05	0.00411195	yes
Unigene0039042	20	1920.5	0.31405	29.7416	6.56534	1.2951e-22	1.07332e-19	yes
Unigene0039043	0	83.5	0.001	5.4669	12.4165	4.84181e-11	9.7726e-09	yes
Unigene0039054	700.5	308	5.6217	2.3925	-1.23249	1.77865e-10	3.15873e-08	yes
Unigene0039060	133.5	54	0.809	0.31665	-1.35325	0.000341978	0.0121464	yes
Unigene0039108	4140.5	1840	39.5448	16.9479	-1.22238	5.7742e-13	1.61141e-10	yes
Unigene0039198	32	225.5	0.40265	2.7987	2.79716	3.94186e-05	0.00199456	yes
Unigene0039260	16	55.5	0.4768	1.60255	1.74891	0.000487871	0.0162176	yes
Unigene0039261	49	172.5	0.7607	2.6157	1.7818	7.14431e-06	0.000444067	yes
Unigene0039318	3619.5	1618.5	16.1197	6.97075	-1.20943	9.42312e-16	3.76223e-13	yes
Unigene0039381	2237.5	588	19.8394	5.04375	-1.9758	3.06355e-36	6.2063e-33	yes
Unigene0039385	210	439.5	1.2968	2.64115	1.02621	0.000921623	0.0269758	yes
Unigene0039386	463	144.5	2.83365	0.8516	-1.73441	1.05802e-10	1.98191e-08	yes
Unigene0039454	59.5	17.5	1.2149	0.3448	-1.81701	0.000416493	0.014283	yes
Unigene0039458	132	398	2.29165	6.73235	1.55472	3.0966e-08	3.47798e-06	yes
Unigene0039550	60.5	16	1.1256	0.2871	-1.97107	4.65884e-05	0.00229576	yes
Unigene0039609	19.5	1.5	0.72075	0.0551	-3.70937	0.000772064	0.0235398	yes
Unigene0039686	123.5	339.5	3.02405	8.05705	1.41377	1.82951e-07	1.72536e-05	yes
Unigene0039727	263	581	3.38395	7.2453	1.09834	3.72709e-07	3.26624e-05	yes
Unigene0039758	14.5	0	0.42005	0.001	-8.71442	0.000481548	0.0160709	yes
Unigene0039851	86	22	2.8239	0.70135	-2.00948	5.68677e-07	4.73848e-05	yes
Unigene0039936	1348.5	3491.5	7.3921	18.5532	1.32762	4.41759e-27	5.38211e-24	yes
Unigene0039940	1685.5	826.5	15.8265	7.5291	-1.0718	5.01962e-15	1.88496e-12	yes
Unigene0039967	1827	14571.5	27.9419	217.399	2.95984	1.72654e-33	2.86177e-30	yes
Unigene0039968	329	2972.5	7.0127	62.382	3.15309	1.07067e-10	1.99876e-08	yes
Unigene0040049	436.5	193	5.8841	2.5178	-1.22466	1.05074e-08	1.31991e-06	yes
Unigene0040418	44	107.5	0.9251	2.1779	1.23526	0.00120689	0.0335441	yes
Unigene0040446	52	13.5	1.4183	0.35885	-1.98271	0.00170661	0.0439286	yes
Unigene0040493	162.5	386	0.8175	1.8817	1.20275	1.9069e-08	2.2724e-06	yes
Unigene0040610	3945.5	1740	24.7351	10.5467	-1.22977	3.02287e-23	2.71057e-20	yes
Unigene0040718	2736.5	924	16.3434	5.3343	-1.61533	1.9839e-26	2.17031e-23	yes
Unigene0040936	406	174.5	2.5934	1.0763	-1.26876	3.09675e-07	2.78138e-05	yes
Unigene0041004	351.5	148	7.7144	3.14875	-1.29277	1.36729e-05	0.000787244	yes
Unigene0041073	1591	563	4.93915	1.68655	-1.55019	8.03599e-19	4.22647e-16	yes
Unigene0041128	122	303	2.69565	6.4789	1.26512	4.6678e-06	0.000308356	yes
Unigene0041153	1295.5	3315.5	5.53685	13.732	1.31041	1.04761e-26	1.2192e-23	yes
Unigene0041336	145	34	4.43585	0.99645	-2.15434	2.02693e-05	0.00112215	yes
Unigene0041599	19.5	268	0.249	3.38335	3.76423	1.57578e-06	0.000118071	yes
Unigene0041656	232	110	1.46875	0.67425	-1.12323	7.32821e-06	0.000454185	yes
Unigene0041712	23	135.5	0.2244	1.28275	2.5151	6.67262e-06	0.000418554	yes
Unigene0041738	215	76	2.71315	0.92815	-1.54754	1.70215e-07	1.62202e-05	yes
Unigene0041792	8.5	166.5	0.14775	2.8209	4.25493	2.79864e-13	8.31958e-11	yes
Unigene0041796	0	11	0.001	0.62165	9.27996	0.00171569	0.0440793	yes
Unigene0041798	21.5	302.5	0.35665	4.90915	3.78289	2.93547e-12	7.20019e-10	yes
Unigene0041843	19.5	243.5	0.18765	2.2972	3.61376	2.68588e-10	4.59101e-08	yes
Unigene0042116	402	128	2.76585	0.8559	-1.69221	1.26791e-10	2.31174e-08	yes
Unigene0042217	753	165.5	6.1136	1.3033	-2.22985	6.23705e-24	6.09204e-21	yes
Unigene0042442	18.5	256	0.9583	13.0475	3.76715	3.29486e-10	5.5453e-08	yes
Unigene0042443	31.5	349	2.20805	23.8875	3.43541	4.19731e-09	5.66875e-07	yes
Unigene0042444	234.5	1771	2.3517	17.4419	2.89078	2.12539e-10	3.75014e-08	yes
Unigene0042459	470.5	234	8.0499	3.8733	-1.05541	3.86126e-06	0.000262038	yes
Unigene0042525	437	191	10.1217	4.28565	-1.23987	2.25934e-09	3.21826e-07	yes
Unigene0042560	288.5	139.5	3.5777	1.66385	-1.10451	0.00156991	0.0411061	yes
Unigene0042608	26.5	120	0.53115	2.34435	2.142	1.07266e-06	8.3698e-05	yes
Unigene0042734	8058	30888	62.8049	235.951	1.90954	2.78742e-09	3.91944e-07	yes
Unigene0042841	59.5	137	1.08475	2.4125	1.15317	0.000735488	0.0225883	yes
Unigene0042942	22.5	99	0.2206	0.94075	2.09238	4.85136e-07	4.09506e-05	yes
Unigene0043008	54	122.5	0.5825	1.2795	1.13525	0.000421571	0.0143939	yes
Unigene0043026	68	27	4.237	1.62105	-1.38611	0.00176246	0.0449431	yes
Unigene0043037	347.5	802	10.9759	24.5002	1.15844	9.19211e-08	9.31093e-06	yes
Unigene0043038	249.5	561	12.2952	26.8039	1.12435	1.3612e-08	1.66566e-06	yes
Unigene0043039	135	290.5	5.1261	10.6961	1.06116	6.06724e-05	0.0028883	yes
Unigene0043210	76.5	26.5	2.4681	0.8308	-1.57083	0.00025752	0.00964124	yes
Unigene0043211	307	157	6.1937	3.0572	-1.01859	0.000213648	0.00828217	yes
Unigene0043265	43.5	452	0.91265	9.16985	3.32876	1.04162e-33	1.78046e-30	yes
Unigene0043296	24	4	1.233	0.19785	-2.63969	0.00124233	0.0342678	yes
Unigene0043358	35.5	94	0.41275	1.0664	1.36941	0.00175917	0.044922	yes
Unigene0043531	172	390.5	1.4925	3.2868	1.13895	1.03549e-05	0.000612981	yes
Unigene0043561	222.5	775	1.72465	5.8471	1.76142	2.7033e-13	8.12444e-11	yes
Unigene0043741	67.5	732	2.4206	25.7097	3.40888	5.34667e-18	2.68305e-15	yes
Unigene0043742	131.5	1397	1.9336	20.0969	3.37762	1.19937e-23	1.13108e-20	yes
Unigene0043750	183	80.5	3.7503	1.5949	-1.23354	0.000193197	0.00766315	yes
Unigene0043784	325	122.5	8.16355	3.00215	-1.4432	1.2955e-06	9.88302e-05	yes
Unigene0043785	94.5	321	0.6811	2.27525	1.74009	0.000582745	0.0186841	yes
Unigene0043882	112	33	2.43245	0.6884	-1.82109	3.58053e-05	0.00183215	yes
Unigene0043986	1172.5	6488	28.7034	154.28	2.42625	4.75678e-75	8.67288e-71	yes
Unigene0043987	0.5	25.5	0.048	2.4197	5.65565	0.000771485	0.0235398	yes
Unigene0044010	42.5	102	0.42465	0.9882	1.21853	0.00106483	0.0304465	yes
Unigene0044078	5	98.5	0.30285	5.9298	4.29131	0.000156332	0.00643903	yes
Unigene0044079	268	1555	1.73305	9.93405	2.51907	2.75635e-05	0.00146091	yes
Unigene0044287	1520	4032	4.9434	12.7112	1.36252	6.96695e-34	1.22929e-30	yes
Unigene0044408	36	87.5	0.60335	1.4224	1.23726	0.00139027	0.0372039	yes
Unigene0044415	2.5	23.5	0.06895	0.63075	3.19345	0.000611469	0.0194433	yes
Unigene0044416	23	70	0.89495	2.6467	1.56432	0.000277451	0.0102541	yes
Unigene0044424	39.5	93	0.76845	1.75135	1.18844	0.00083081	0.0248462	yes
Unigene0044461	26.5	90.5	0.19335	0.64285	1.73327	5.37731e-05	0.0026006	yes
Unigene0044631	28.5	78.5	0.82475	2.19755	1.41387	0.00069936	0.0216734	yes
Unigene0044746	25	1	1.3365	0.05035	-4.73032	0.00132394	0.0358839	yes
Unigene0044747	94	206	0.5448	1.1571	1.08671	0.000113981	0.00496775	yes
Unigene0044797	21.5	90.5	0.40095	1.63115	2.0244	7.85753e-07	6.32367e-05	yes
Unigene0044960	167.5	393.5	3.1146	7.10835	1.19047	2.05819e-05	0.00113601	yes
Unigene0045036	10	38	0.27995	1.02995	1.87933	0.00195015	0.0487075	yes
Unigene0045387	105.5	290	5.6507	15.042	1.4125	5.64299e-09	7.49176e-07	yes
Unigene0045389	102	213	2.9178	5.8845	1.01204	0.000275046	0.0101927	yes
Unigene0045394	74.5	29	4.6252	1.73665	-1.41321	0.000668871	0.0209182	yes
Unigene0045489	0	68	0.001	1.6633	10.6998	0.00012501	0.00537987	yes
Unigene0045699	2885.5	798	78.436	21.045	-1.89804	3.13247e-22	2.25447e-19	yes
Unigene0045958	206.5	35.5	5.44525	0.9136	-2.57536	2.99937e-13	8.77323e-11	yes
Unigene0045992	2	1145.5	0.0494	28.0837	9.15101	1.80475e-13	5.51488e-11	yes
Unigene0046094	0	47.5	0.001	1.9237	10.9097	0.000277857	0.0102621	yes
Unigene0046096	16.5	1	0.53715	0.03155	-4.08961	0.000770069	0.0235314	yes
Unigene0046279	24.5	0.5	0.90665	0.0175	-5.69512	1.05455e-05	0.000622915	yes
Unigene0046294	63	4	1.0744	0.06605	-4.02383	8.37901e-09	1.07586e-06	yes
Unigene0046837	11	0	1.0281	0.001	-10.0058	0.00169628	0.0437666	yes
Unigene0047416	0	48	0.001	1.0111	9.98171	0.000269756	0.010017	yes
Unigene0047462	0	12	0.001	0.51325	9.00352	0.00189209	0.0475668	yes
Unigene0047550	2	35.5	0.0615	1.08515	4.14116	0.00142028	0.0377852	yes
Unigene0047966	19	2	0.7219	0.0718	-3.32974	0.0019377	0.0485073	yes
Unigene0048551	11.5	0	0.8681	0.001	-9.76172	0.00107027	0.03057	yes
Unigene0048865	1	31	0.01885	0.5762	4.93393	0.000344426	0.012223	yes
Unigene0048919	90.5	313	1.92875	6.45845	1.74352	4.31568e-12	1.03082e-09	yes
Unigene0048928	243	1208.5	3.8356	18.5146	2.27114	2.39788e-36	5.04458e-33	yes
Unigene0049084	1	15.5	0.0331	0.5002	3.9176	0.00200766	0.0497577	yes
Unigene0049136	0.5	71.5	0.01535	2.18725	7.15474	5.66388e-06	0.000364046	yes
Unigene0049142	41	10	0.8301	0.1954	-2.08685	0.000440987	0.0149558	yes
Unigene0049352	5	54.5	0.07675	0.82145	3.41993	5.56172e-05	0.0026709	yes
Unigene0049395	0	11.5	0.001	0.497	8.9571	0.0015436	0.0405384	yes
Unigene0049691	0.5	15	0.01945	0.5687	4.86983	0.00109003	0.0309567	yes
Unigene0050168	0	48	0.001	2.3104	11.1739	0.000269948	0.0100174	yes
Unigene0050573	7	1012.5	0.15765	22.1839	7.13665	5.13018e-116	2.8061e-111	yes
Unigene0050750	0	24	0.001	0.9608	9.90809	0.00191727	0.0480399	yes
Unigene0051349	0	39	0.001	1.3317	10.3791	3.00281e-06	0.000209233	yes
Unigene0051602	27	280.5	0.69775	7.03025	3.33279	9.94431e-26	1.04603e-22	yes
Unigene0052330	12	3543.5	0.23005	66.9376	8.18472	8.8205e-40	2.19302e-36	yes
Unigene0052344	301	148	9.2826	4.39715	-1.07796	0.000322649	0.0116031	yes
Unigene0052555	2	32.5	0.0302	0.47635	3.9794	1.56158e-06	0.000117328	yes
Unigene0052574	0	13.5	0.001	0.5556	9.1179	0.0013334	0.0359967	yes
Unigene0052676	10.5	0	0.3349	0.001	-8.38759	0.00200245	0.0496729	yes
Unigene0052856	0	12.5	0.001	0.5576	9.12309	0.000665526	0.0208493	yes
Unigene0052876	0	11	0.001	0.58635	9.19562	0.00168245	0.043516	yes
Unigene0052904	0	12	0.001	0.62395	9.28529	0.000991517	0.0285743	yes
Unigene0053503	3	33.5	0.11505	1.2385	3.42826	5.82918e-05	0.00278467	yes
Unigene0054057	0	45.5	0.001	0.61665	9.26831	8.78215e-08	8.94537e-06	yes
Unigene0054083	8.5	47	0.19525	1.04725	2.42321	1.2047e-05	0.000701737	yes
Unigene0054211	1.5	16.5	0.0737	0.7887	3.41974	0.00195328	0.0487479	yes
Unigene0054361	54	17	1.06725	0.323	-1.72429	0.00108254	0.0307758	yes
Unigene0054465	21	2	0.6616	0.0626	-3.40172	0.00157936	0.0412746	yes
Unigene0054573	592	162	23.26	6.148	-1.91967	1.67325e-16	6.98651e-14	yes
Unigene0054786	1	27.5	0.0235	0.617	4.71454	2.65209e-05	0.0014125	yes
Unigene0054887	0	31.5	0.001	1.70455	10.7352	8.22462e-05	0.00373027	yes
Unigene0054919	241	124	4.5732	2.2677	-1.01197	0.0010316	0.0296047	yes
Unigene0055847	104.5	19.5	1.1037	0.20115	-2.456	9.61047e-09	1.21684e-06	yes
Unigene0055856	374	174	6.74995	3.03685	-1.1523	4.05429e-06	0.000273442	yes
Unigene0056005	0	15.5	0.001	0.7453	9.54168	0.000143085	0.00596076	yes
Unigene0056161	79	28	0.9517	0.32555	-1.54763	0.000591643	0.0189029	yes
Unigene0056168	151.5	14	1.52425	0.13345	-3.51373	3.37485e-07	3.00647e-05	yes
Unigene0056212	0	44.5	0.001	1.1779	10.202	0.000328531	0.0117682	yes
Unigene0056217	0	11.5	0.001	0.36735	8.52101	0.00154377	0.0405384	yes
Unigene0056264	0	18	0.001	0.7348	9.52121	0.000513336	0.0168944	yes
Unigene0056265	1	43.5	0.0267	1.148	5.42614	2.33072e-06	0.000167524	yes
Unigene0056545	0	14	0.001	0.53615	9.06649	0.000571746	0.0184824	yes
Unigene0056931	2	42	0.0282	0.57765	4.35643	9.99087e-08	1.00456e-05	yes
Unigene0056977	43	6.5	1.39675	0.20755	-2.75054	2.95331e-05	0.00154732	yes
Unigene0057102	12	42	0.82255	2.78195	1.75792	0.00112687	0.0316741	yes
