# Supplementary material for: Identification of Candidate Genes Associated with Pulp Color by Transcriptomic Analysis of ‘Huaxiu’ Plum (Prunus salicina Lindl.) during Fruit-Ripening
Source: Curr Issues Mol Biol. 2022 Dec 15;44(12):6368–84. doi: 10.3390/cimb44120434 (PMC9776821; doi:10.3390/cimb44120434)
Supplement: Supplementary file 1 [file cimb-44-00434-s001.zip › Table S10.xlsx]

## Sheet: Table S9
GeneID	OS_count	RS_count	OS_rpkm	RS_rpkm	log2 Ratio(RS/OS)	Pvalue	FDR	significant
Unigene0000009	97	295.5	4.03435	12.576	1.64026	2.83515e-07	6.19007e-06	yes
Unigene0000012	784	226	23.7107	7.03145	-1.75364	3.35879e-16	2.10656e-14	yes
Unigene0000019	1	18	0.04425	0.8148	4.2027	0.000412976	0.00459567	yes
Unigene0000031	43	2.5	0.4125	0.0251	-4.03863	2.5358e-07	5.56957e-06	yes
Unigene0000032	2425.5	1163	22.0972	11.0195	-1.00381	1.77958e-15	1.04479e-13	yes
Unigene0000051	185.5	471.5	1.9195	5.0749	1.40265	1.24151e-08	3.3866e-07	yes
Unigene0000065	228	81	5.63975	2.1065	-1.42078	1.52597e-06	2.94143e-05	yes
Unigene0000093	15609.5	6459	269.069	115.086	-1.22527	8.43885e-16	5.07888e-14	yes
Unigene0000094	6574.5	2583.5	61.047	24.8558	-1.29634	9.63246e-16	5.78462e-14	yes
Unigene0000097	22	54.5	0.86415	2.26385	1.38942	0.00527028	0.0413882	yes
Unigene0000098	83	994	1.4827	17.3545	3.54901	1.67967e-07	3.80593e-06	yes
Unigene0000114	583.5	2145	6.3814	23.7873	1.89825	1.85235e-11	7.20666e-10	yes
Unigene0000115	521	1411.5	14.0501	38.5883	1.45759	7.03392e-07	1.43567e-05	yes
Unigene0000131	3681	20191	43.8872	249.27	2.50584	1.75686e-103	3.72514e-100	yes
Unigene0000161	1	13.5	0.04115	0.5737	3.80133	0.00486358	0.0387317	yes
Unigene0000180	147	56	1.06455	0.4266	-1.31929	0.000674613	0.0071124	yes
Unigene0000182	94	1	0.90115	0.00925	-6.60617	4.57e-20	3.96755e-18	yes
Unigene0000186	94.5	12	3.49975	0.47175	-2.89116	7.2688e-09	2.03206e-07	yes
Unigene0000207	3911	8157.5	48.2319	104.32	1.11296	6.80059e-30	1.11913e-27	yes
Unigene0000222	282	132	13.8965	6.8479	-1.02099	0.000256776	0.00301508	yes
Unigene0000224	105	21.5	3.4875	0.72965	-2.25692	2.34696e-05	0.000358707	yes
Unigene0000234	14	102	0.2819	2.12645	2.91519	2.67376e-11	1.01797e-09	yes
Unigene0000238	175.5	546	1.68065	5.3991	1.6837	9.73699e-17	6.40561e-15	yes
Unigene0000241	67.5	25.5	1.7381	0.68185	-1.34998	0.00380301	0.031461	yes
Unigene0000246	2418	953.5	36.3244	14.8464	-1.29083	2.11599e-19	1.71044e-17	yes
Unigene0000252	45.5	15	4.1446	1.41615	-1.54926	0.00246434	0.0216642	yes
Unigene0000254	71	20	4.34655	1.2545	-1.79276	4.56508e-05	0.0006541	yes
Unigene0000256	635	208	8.8077	3.00625	-1.5508	1.48658e-15	8.77451e-14	yes
Unigene0000258	123	50.5	3.50175	1.48095	-1.24155	0.000177485	0.00217822	yes
Unigene0000260	41	5	2.5015	0.30735	-3.02484	1.02881e-05	0.00016966	yes
Unigene0000262	219	103.5	3.633	1.80095	-1.0124	0.000306915	0.00352812	yes
Unigene0000264	127	61	5.35625	2.6667	-1.00617	0.0042273	0.0344744	yes
Unigene0000277	104.5	49	0.8043	0.39555	-1.02387	0.00421357	0.0343675	yes
Unigene0000291	138	58	1.62425	0.70135	-1.21157	0.000196268	0.00237542	yes
Unigene0000293	220	1154	5.77625	31.0926	2.42837	1.61292e-35	3.59996e-33	yes
Unigene0000311	95	24	3.02145	0.7711	-1.97025	1.45888e-05	0.000232783	yes
Unigene0000312	180	1934	1.38845	15.3977	3.47117	6.9709e-93	1.03864e-89	yes
Unigene0000336	33.5	71.5	0.66175	1.46985	1.15131	0.00416646	0.0340143	yes
Unigene0000348	1292.5	467.5	13.1859	4.98125	-1.40441	3.71833e-17	2.53384e-15	yes
Unigene0000360	167	17	2.2871	0.2387	-3.26025	1.27553e-14	6.86036e-13	yes
Unigene0000380	709	51	30.4655	2.305	-3.72434	2.01975e-12	8.78131e-11	yes
Unigene0000384	370	89	12.3894	3.0902	-2.00333	1.35067e-16	8.74983e-15	yes
Unigene0000388	26.5	3.5	0.76905	0.11035	-2.80099	0.00219489	0.0196848	yes
Unigene0000401	81	23	1.89675	0.56145	-1.7563	2.42611e-05	0.000369473	yes
Unigene0000405	55	1	2.3639	0.04135	-5.83714	5.73285e-11	2.10979e-09	yes
Unigene0000408	51	8	0.50465	0.0806	-2.64643	6.11685e-06	0.000105479	yes
Unigene0000433	771	319.5	7.6003	3.2263	-1.23618	1.72999e-09	5.23738e-08	yes
Unigene0000444	61	23	1.07475	0.42345	-1.34374	0.00260599	0.0227067	yes
Unigene0000448	46	1	0.6543	0.01545	-5.40427	0.0029272	0.0251361	yes
Unigene0000451	158	44.5	1.88105	0.5412	-1.7973	0.000104757	0.00136496	yes
Unigene0000460	5696.5	2591	38.3404	18.0694	-1.08532	1.61761e-23	1.75546e-21	yes
Unigene0000461	31	8	1.2016	0.3141	-1.93566	0.00345333	0.0289769	yes
Unigene0000470	1160.5	3113.5	8.41605	23.2749	1.46756	1.48435e-28	2.31816e-26	yes
Unigene0000503	78	24	0.55695	0.178	-1.64567	7.8764e-05	0.00105855	yes
Unigene0000526	30	0	1.0115	0.001	-9.98228	0.00102436	0.0102323	yes
Unigene0000533	494.5	990.5	3.29345	6.8477	1.05602	4.26923e-12	1.77094e-10	yes
Unigene0000536	176866	379584	2143.08	4753.96	1.14945	1.70158e-35	3.78252e-33	yes
Unigene0000546	93.5	44	0.64315	0.31765	-1.01772	0.00601366	0.0460199	yes
Unigene0000552	43	7	0.35285	0.05905	-2.57905	1.8081e-05	0.000282927	yes
Unigene0000555	79	15.5	0.6844	0.13495	-2.34241	8.95693e-06	0.000149406	yes
Unigene0000583	28.5	70	0.4088	1.06	1.3746	0.00220755	0.0197758	yes
Unigene0000584	94	23.5	0.5208	0.1348	-1.94991	7.85782e-07	1.59087e-05	yes
Unigene0000588	292.5	1260	3.95745	17.4	2.13644	1.3363e-22	1.36424e-20	yes
Unigene0000600	1835.5	679.5	19.8557	7.6553	-1.37502	5.61639e-23	5.9089e-21	yes
Unigene0000601	1108.5	47	11.948	0.52255	-4.51506	1.01924e-99	1.87298e-96	yes
Unigene0000605	30	6	0.4195	0.09115	-2.20236	0.00594717	0.045634	yes
Unigene0000611	824.5	2283.5	6.9177	19.845	1.52041	5.95489e-28	8.80126e-26	yes
Unigene0000612	149	56	7.85525	3.05555	-1.36223	1.70808e-05	0.000268429	yes
Unigene0000631	182	73.5	0.8936	0.3726	-1.262	7.64046e-06	0.000128968	yes
Unigene0000634	3	67	0.0493	1.15325	4.54797	4.1644e-10	1.3633e-08	yes
Unigene0000646	40.5	98	0.2796	0.7133	1.35114	0.000588021	0.00630926	yes
Unigene0000674	32.5	7	1.09605	0.24375	-2.16884	0.000710344	0.00744214	yes
Unigene0000712	253.5	99	8.15	3.27515	-1.31524	3.75108e-07	8.00284e-06	yes
Unigene0000722	49.5	0	1.18585	0.001	-10.2117	0.000275471	0.00320931	yes
Unigene0000754	2364	4910.5	26.2692	57.0849	1.11974	5.02957e-12	2.06613e-10	yes
Unigene0000764	11748.5	23142	48.9194	99.5906	1.0256	8.60674e-28	1.24863e-25	yes
Unigene0000774	65	154	0.70845	1.72505	1.2839	0.00015918	0.001976	yes
Unigene0000787	5	55.5	0.0944	1.1124	3.55874	3.29565e-08	8.42698e-07	yes
Unigene0000790	936.5	366.5	7.5616	3.0872	-1.29239	1.70876e-14	9.09289e-13	yes
Unigene0000797	84	17.5	2.9388	0.64445	-2.18909	1.95175e-06	3.69119e-05	yes
Unigene0000801	16	0	0.53775	0.001	-9.07079	0.00663229	0.0499906	yes
Unigene0000806	3	33.5	0.06875	0.77005	3.48552	0.000289774	0.00335678	yes
Unigene0000807	63	23.5	0.52355	0.20335	-1.36436	0.00161361	0.0151493	yes
Unigene0000816	45	0	1.18965	0.001	-10.2163	0.000344564	0.00390934	yes
Unigene0000834	231	14	5.0558	0.31215	-4.01763	1.28526e-26	1.71978e-24	yes
Unigene0000835	141.5	6	5.308	0.21565	-4.6214	2.60118e-09	7.68903e-08	yes
Unigene0000836	271	65	6.00945	1.4802	-2.02144	5.7407e-11	2.11127e-09	yes
Unigene0000853	553	219	9.34685	3.8908	-1.26441	5.28971e-08	1.30302e-06	yes
Unigene0000858	30.5	2	1.68885	0.11485	-3.87822	5.84149e-06	0.000101307	yes
Unigene0000877	143	65.5	2.94825	1.40815	-1.06606	0.0014963	0.014188	yes
Unigene0000887	112.5	434	1.50445	6.05385	2.00862	3.02166e-16	1.90378e-14	yes
Unigene0000903	283.5	91.5	2.9936	0.99715	-1.586	1.91942e-09	5.78545e-08	yes
Unigene0000905	25	1.5	0.8264	0.04785	-4.11025	6.53357e-05	0.000898228	yes
Unigene0000929	184.5	80	1.59735	0.7227	-1.14421	4.83373e-05	0.000687155	yes
Unigene0000952	4083	9961	19.0791	47.9692	1.33012	3.76859e-27	5.23321e-25	yes
Unigene0000972	234.5	82	1.87355	0.67785	-1.46674	2.39533e-08	6.2584e-07	yes
Unigene0000991	146	62.5	11.9901	5.27395	-1.18488	0.000228648	0.00272425	yes
Unigene0000993	403.5	168	20.1468	8.734	-1.20583	2.63795e-08	6.8598e-07	yes
Unigene0000994	333	120	9.80055	3.6598	-1.4211	5.78424e-10	1.86479e-08	yes
Unigene0000995	248.5	84.5	9.44315	3.32675	-1.50515	8.26572e-08	1.97094e-06	yes
Unigene0000996	631	243	10.266	4.101	-1.32383	8.85413e-12	3.55254e-10	yes
Unigene0000997	96.5	42.5	6.0659	2.72605	-1.15391	0.00221622	0.0198341	yes
Unigene0000998	660	241.5	20.6127	7.8685	-1.38937	6.84748e-13	3.11207e-11	yes
Unigene0001017	53	19	0.9322	0.3477	-1.4228	0.00238156	0.0210608	yes
Unigene0001024	15.5	116.5	0.1251	0.96675	2.95006	1.57994e-12	6.94028e-11	yes
Unigene0001027	226	17.5	1.9247	0.16185	-3.5719	8.09758e-13	3.65611e-11	yes
Unigene0001031	2	19	0.09185	0.92545	3.3328	0.00186343	0.0171329	yes
Unigene0001048	15362.5	6240.5	102.943	43.4312	-1.24504	1.70421e-37	4.21306e-35	yes
Unigene0001052	304	118	2.2751	0.92975	-1.29102	1.37425e-05	0.000220556	yes
Unigene0001063	67	252	4.7834	19.0086	1.99054	7.11829e-09	1.99301e-07	yes
Unigene0001079	290	127.5	2.7787	1.2856	-1.11197	5.71726e-05	0.000798953	yes
Unigene0001114	6724.5	2019.5	61.0872	19.1936	-1.67024	1.21831e-36	2.92018e-34	yes
Unigene0001123	32	0	0.68855	0.001	-9.42742	4.71887e-09	1.35634e-07	yes
Unigene0001128	338.5	113	2.88895	0.99385	-1.53945	1.48982e-10	5.21144e-09	yes
Unigene0001149	665.5	5969	3.7731	34.7411	3.20282	4.86964e-101	9.25719e-98	yes
Unigene0001172	2184	925.5	15.7977	6.97685	-1.17907	5.28001e-18	3.85029e-16	yes
Unigene0001175	18.5	882.5	0.20125	9.61195	5.57777	3.95005e-25	4.81775e-23	yes
Unigene0001177	16	151	0.6039	6.09205	3.33455	1.35986e-10	4.76894e-09	yes
Unigene0001179	27.5	134	2.1894	11.1789	2.35217	4.12366e-10	1.35076e-08	yes
Unigene0001180	1564.5	696.5	11.2486	5.21695	-1.10847	1.89422e-14	1.00217e-12	yes
Unigene0001191	58.5	214	1.586	5.9046	1.89645	1.02102e-06	2.02985e-05	yes
Unigene0001198	407.5	130.5	7.66345	2.5616	-1.58095	0.00159994	0.0150569	yes
Unigene0001199	141	57.5	4.4983	1.9438	-1.2105	0.00103597	0.0103333	yes
Unigene0001201	300	136.5	2.15655	1.0348	-1.05937	0.000231811	0.00275717	yes
Unigene0001231	1585	3205.5	17.6853	37.3806	1.07974	3.69272e-13	1.73552e-11	yes
Unigene0001234	263.5	102	2.33195	0.93595	-1.31703	6.6576e-07	1.36393e-05	yes
Unigene0001295	1072	440	7.24765	3.09015	-1.22984	7.4704e-16	4.53065e-14	yes
Unigene0001321	160.5	74.5	1.23565	0.59035	-1.06563	0.000308995	0.00354518	yes
Unigene0001324	343	103.5	1.9095	0.6012	-1.66728	4.21086e-11	1.5749e-09	yes
Unigene0001348	93	36	4.73475	1.93435	-1.29144	0.00104764	0.0104402	yes
Unigene0001401	1893	3920.5	30.9138	66.114	1.0967	4.83504e-20	4.17791e-18	yes
Unigene0001402	516.5	1309.5	8.42605	22.0561	1.38825	4.79774e-21	4.43783e-19	yes
Unigene0001418	109.5	48.5	1.35545	0.6172	-1.13496	0.0023383	0.0207333	yes
Unigene0001433	305	614.5	7.03395	14.7817	1.0714	4.12544e-08	1.0385e-06	yes
Unigene0001434	762.5	2119	10.0656	29.3256	1.54272	5.93899e-19	4.61792e-17	yes
Unigene0001473	263.5	622	3.7291	9.17435	1.29878	7.67351e-12	3.10142e-10	yes
Unigene0001495	542.5	1128.5	4.3727	9.56815	1.12972	1.90804e-07	4.28641e-06	yes
Unigene0001512	0	9.5	0.001	0.5135	9.00422	0.00394292	0.0324238	yes
Unigene0001560	170.5	57.5	3.57965	1.28915	-1.4734	0.000302087	0.00348228	yes
Unigene0001578	31.5	7	0.2708	0.061	-2.15035	0.00173375	0.0161099	yes
Unigene0001579	191	812.5	2.0771	9.1421	2.13795	4.16971e-29	6.66295e-27	yes
Unigene0001595	233.5	110.5	8.32825	4.1569	-1.00251	0.000843369	0.00865328	yes
Unigene0001611	79.5	2	5.595	0.14355	-5.28451	1.34429e-06	2.61594e-05	yes
Unigene0001624	17.5	2	0.3654	0.0432	-3.08037	0.00274516	0.0237691	yes
Unigene0001625	146	28	1.51055	0.2976	-2.34363	3.6504e-10	1.20505e-08	yes
Unigene0001664	11901	4184.5	46.8224	17.1012	-1.4531	3.09411e-50	1.31212e-47	yes
Unigene0001672	380.5	132.5	4.8867	1.74425	-1.48625	1.90913e-07	4.2871e-06	yes
Unigene0001674	1237.5	594.5	23.8006	11.794	-1.01294	8.53749e-12	3.4355e-10	yes
Unigene0001678	104	0	2.62355	0.001	-11.3573	6.01392e-05	0.000835713	yes
Unigene0001685	613.5	113.5	3.2066	0.62005	-2.37059	3.26786e-26	4.25896e-24	yes
Unigene0001688	39.5	10	2.89425	0.7777	-1.8959	0.00195244	0.0178323	yes
Unigene0001689	382	87.5	1.7093	0.4071	-2.06995	4.98653e-18	3.65076e-16	yes
Unigene0001697	41.5	7	0.93035	0.15615	-2.57484	0.000425874	0.00471383	yes
Unigene0001703	3883.5	10709	33.9804	97.0768	1.51442	8.37864e-54	3.8174e-51	yes
Unigene0001718	77.5	31.5	1.0957	0.45295	-1.27443	0.00383448	0.0316833	yes
Unigene0001719	40	9	0.4125	0.0973	-2.08388	0.000622119	0.00662612	yes
Unigene0001736	3488	9804	24.0142	69.6925	1.53712	3.86369e-44	1.36539e-41	yes
Unigene0001750	63	13	0.84715	0.1826	-2.21393	6.89425e-06	0.000117488	yes
Unigene0001759	2385.5	6219.5	42.8507	114.501	1.41797	2.03908e-20	1.82416e-18	yes
Unigene0001760	65	476.5	2.00925	14.9662	2.89698	8.20655e-18	5.90625e-16	yes
Unigene0001761	1694	736.5	25.021	11.3015	-1.14663	1.17333e-17	8.32491e-16	yes
Unigene0001762	1494	535.5	11.2788	4.2093	-1.42196	1.28343e-22	1.31513e-20	yes
Unigene0001764	25	6	0.787	0.19935	-1.98106	0.0053419	0.0418493	yes
Unigene0001765	998	374.5	16.2373	6.28145	-1.37014	2.43359e-15	1.40926e-13	yes
Unigene0001779	575	72.5	6.39165	0.8372	-2.93254	4.50067e-34	9.29278e-32	yes
Unigene0001789	501.5	237.5	12.6499	6.2533	-1.01644	5.4233e-07	1.12994e-05	yes
Unigene0001801	32	6	1.73565	0.3312	-2.3897	0.000432532	0.00477761	yes
Unigene0001809	51.5	3	1.88145	0.1037	-4.18136	0.00292598	0.0251296	yes
Unigene0001841	58	14.5	0.558	0.14785	-1.91613	0.000354654	0.00401308	yes
Unigene0001854	6960	2894	95.6256	41.2013	-1.21471	6.25509e-31	1.11238e-28	yes
Unigene0001855	4065	15609	20.7858	82.1474	1.98261	1.95172e-65	1.23674e-62	yes
Unigene0001856	64	20.5	1.2109	0.40115	-1.59387	0.00075818	0.00788326	yes
Unigene0001884	810.5	354	9.13635	4.1325	-1.1446	1.4767e-12	6.51793e-11	yes
Unigene0001898	125	17.5	1.43725	0.21085	-2.76902	2.31167e-11	8.88083e-10	yes
Unigene0001899	621	140	5.6805	1.3331	-2.09123	1.03359e-24	1.21754e-22	yes
Unigene0001905	26	391.5	0.69725	10.9047	3.96714	8.25882e-25	9.81251e-23	yes
Unigene0001912	0	13	0.001	0.91675	9.84038	0.000851851	0.00872894	yes
Unigene0001924	3351	805	33.818	8.458	-1.9994	1.92925e-54	9.09039e-52	yes
Unigene0001925	105	9.5	6.30455	0.58885	-3.42042	6.65214e-14	3.34604e-12	yes
Unigene0001928	1	17	0.03005	0.5161	4.10221	0.000557122	0.00600814	yes
Unigene0001931	153	50	1.4431	0.49725	-1.53713	0.000105437	0.00137252	yes
Unigene0001937	1061	220.5	9.1417	1.9984	-2.19362	6.19685e-18	4.49508e-16	yes
Unigene0001941	7830	2848	49.5889	18.8188	-1.39784	2.83685e-32	5.35591e-30	yes
Unigene0001942	238.5	106.5	6.65625	3.1209	-1.09275	8.49858e-05	0.00113169	yes
Unigene0001946	52.5	15	0.48505	0.14435	-1.74856	0.00255319	0.0223243	yes
Unigene0001953	1	246.5	0.03005	7.1586	7.89617	2.14601e-16	1.37248e-14	yes
Unigene0001954	0	98.5	0.001	4.115	12.0067	8.1407e-24	8.99376e-22	yes
Unigene0001956	1	65.5	0.04285	2.8797	6.07048	1.15269e-09	3.57005e-08	yes
Unigene0001957	30632	92495.5	407.868	1280.92	1.651	1.82709e-64	1.13175e-61	yes
Unigene0001959	62	6	1.2372	0.12485	-3.30881	0.00137671	0.0131994	yes
Unigene0001978	376	66	9.7512	1.76785	-2.46358	1.14608e-19	9.50109e-18	yes
Unigene0001986	1350	438	8.87475	2.98565	-1.57166	3.98712e-27	5.50893e-25	yes
Unigene0001996	2327.5	1078	11.7476	5.59965	-1.06896	1.16395e-13	5.73949e-12	yes
Unigene0002014	568	261.5	3.7961	1.82375	-1.05761	1.07402e-07	2.52278e-06	yes
Unigene0002028	33	9	0.77115	0.2147	-1.84469	0.00358419	0.0299066	yes
Unigene0002034	74.5	212	0.57215	1.6791	1.55322	1.97885e-08	5.22722e-07	yes
Unigene0002041	34	147.5	0.42645	1.92275	2.17272	3.70122e-10	1.2189e-08	yes
Unigene0002050	11325.5	22366	54.0857	111.187	1.03967	3.80511e-25	4.6616e-23	yes
Unigene0002051	629	280	9.8247	4.5404	-1.11359	4.08943e-10	1.34114e-08	yes
Unigene0002098	65	145.5	1.24745	2.89505	1.21461	9.18992e-05	0.0012103	yes
Unigene0002118	1272	489	12.5006	4.99075	-1.32466	1.9083e-19	1.55166e-17	yes
Unigene0002125	88	17.5	1.12975	0.22595	-2.32193	0.000905727	0.00920572	yes
Unigene0002127	19	0	0.82365	0.001	-9.68589	0.00402979	0.0330298	yes
Unigene0002132	52.5	10.5	0.8269	0.17565	-2.23501	5.22092e-05	0.000735183	yes
Unigene0002147	241.5	51.5	5.14635	1.12095	-2.19883	2.39795e-12	1.02717e-10	yes
Unigene0002151	18	53	0.2931	0.91	1.63447	0.00269993	0.02344	yes
Unigene0002158	103	211	7.99185	16.8646	1.0774	0.00272297	0.0236215	yes
Unigene0002159	40851.5	132972	145.871	491.68	1.75302	4.64224e-31	8.30915e-29	yes
Unigene0002162	2295	4855.5	98.4498	217.486	1.14346	9.28792e-17	6.11748e-15	yes
Unigene0002169	20	0	0.6765	0.001	-9.40195	0.00332322	0.028056	yes
Unigene0002187	38.5	1.5	3.40305	0.1463	-4.53983	1.08627e-06	2.15336e-05	yes
Unigene0002188	32696.5	12483	782.327	306.512	-1.35183	1.66717e-26	2.21469e-24	yes
Unigene0002206	7542.5	3291.5	42.0508	19.0972	-1.13877	3.16666e-27	4.41961e-25	yes
Unigene0002226	522	171.5	3.7278	1.2842	-1.53745	1.4195e-11	5.59747e-10	yes
Unigene0002239	24.5	4.5	1.6159	0.3042	-2.40925	0.00311153	0.0265166	yes
Unigene0002253	355.5	1231.5	3.8693	13.8787	1.84272	1.44455e-32	2.76516e-30	yes
Unigene0002254	89.5	285.5	2.48575	8.1503	1.71317	8.79965e-09	2.43777e-07	yes
Unigene0002255	213	993	3.4708	16.7398	2.26994	5.74554e-41	1.66708e-38	yes
Unigene0002256	1286	5681.5	5.827	26.6041	2.19082	1.41334e-79	1.55832e-76	yes
Unigene0002257	100	31	5.9037	1.88765	-1.64503	1.18073e-05	0.00019224	yes
Unigene0002264	458	211.5	14.4588	6.8931	-1.06872	1.33012e-07	3.06941e-06	yes
Unigene0002279	184.5	69	1.84115	0.7114	-1.37187	1.67278e-06	3.19538e-05	yes
Unigene0002282	63.5	133.5	1.39735	3.0904	1.1451	0.00329925	0.0279007	yes
Unigene0002290	610.5	150.5	4.95585	1.2638	-1.97136	4.82197e-20	4.17316e-18	yes
Unigene0002298	380	159.5	2.8926	1.2816	-1.17442	8.66373e-05	0.00114951	yes
Unigene0002300	9.5	0	0.50695	0.001	-8.9857	0.00339697	0.0285823	yes
Unigene0002331	1395.5	406.5	18.9343	5.7558	-1.71792	1.2533e-24	1.46074e-22	yes
Unigene0002347	148	462	2.3023	7.46605	1.69727	5.48267e-14	2.7909e-12	yes
Unigene0002356	4507	10242.5	31.4759	73.6202	1.22585	2.83139e-24	3.23842e-22	yes
Unigene0002361	1489	660	13.5093	6.22955	-1.11675	2.76863e-15	1.59657e-13	yes
Unigene0002372	10.5	0	0.5134	0.001	-9.00394	0.00201297	0.0183063	yes
Unigene0002375	739.5	1497	11.172	23.5465	1.07563	6.33871e-13	2.89529e-11	yes
Unigene0002405	925.5	297.5	10.2546	3.4121	-1.58754	1.11006e-22	1.146e-20	yes
Unigene0002427	53	20.5	0.92975	0.37865	-1.29598	0.00636215	0.0483007	yes
Unigene0002428	0	185	0.001	7.27215	12.8282	1.45898e-12	6.45003e-11	yes
Unigene0002483	113	40	4.41195	1.6116	-1.45292	0.000156452	0.00194829	yes
Unigene0002489	248	101	2.64815	1.13235	-1.22566	1.93459e-05	0.000300852	yes
Unigene0002497	91.5	37.5	1.2315	0.5294	-1.21799	0.00129653	0.0125112	yes
Unigene0002501	758.5	105.5	10.2394	1.48	-2.79046	9.80538e-44	3.35752e-41	yes
Unigene0002502	409	35.5	3.79025	0.34365	-3.46328	8.82501e-35	1.87843e-32	yes
Unigene0002514	808.5	333.5	8.3233	3.55105	-1.22891	6.97698e-11	2.54385e-09	yes
Unigene0002518	195	88	1.51075	0.71045	-1.08846	0.000194131	0.00235421	yes
Unigene0002530	24120.5	163458	111.118	777.426	2.80662	1.72649e-136	6.79855e-133	yes
Unigene0002590	389	178.5	9.29745	4.4798	-1.0534	3.27649e-05	0.000485433	yes
Unigene0002636	429.5	119.5	7.28085	2.10675	-1.78909	1.21436e-15	7.21404e-14	yes
Unigene0002673	49	271	1.66315	9.4696	2.50939	7.39092e-18	5.33317e-16	yes
Unigene0002678	223.5	55	1.51435	0.3883	-1.96346	5.45061e-11	2.01398e-09	yes
Unigene0002685	55.5	17.5	1.1924	0.40075	-1.57309	0.00264829	0.0230389	yes
Unigene0002687	84.5	19.5	2.58245	0.6147	-2.07079	0.00534888	0.0418889	yes
Unigene0002693	5095.5	2013.5	14.322	5.871	-1.28655	3.15684e-32	5.9397e-30	yes
Unigene0002696	199	424	2.72655	6.0389	1.14721	7.63627e-08	1.83194e-06	yes
Unigene0002707	32.5	136.5	1.8663	8.2256	2.13994	9.66109e-09	2.66436e-07	yes
Unigene0002708	550	261	11.2623	5.5479	-1.02149	5.03116e-08	1.24378e-06	yes
Unigene0002714	3.5	28.5	0.21565	1.81925	3.07658	7.39192e-05	0.00100125	yes
Unigene0002731	13	1	0.29215	0.0217	-3.75094	0.00539108	0.0421508	yes
Unigene0002733	564	212.5	2.976	1.1801	-1.33447	2.41415e-08	6.30159e-07	yes
Unigene0002746	49	0	1.0437	0.001	-10.0275	0.000280607	0.00326087	yes
Unigene0002750	108.5	44.5	4.05765	1.7067	-1.24943	0.000881199	0.0089929	yes
Unigene0002767	2945	5852.5	24.9983	51.4136	1.04032	7.67498e-24	8.49626e-22	yes
Unigene0002769	7980	1577	23.8788	4.8871	-2.28868	8.02095e-94	1.2283e-90	yes
Unigene0002775	26	2	0.68305	0.0588	-3.5381	0.00015301	0.0019093	yes
Unigene0002779	127	27	3.8775	0.84455	-2.19887	6.04685e-09	1.70777e-07	yes
Unigene0002803	875	396	3.54355	1.67415	-1.08177	4.07809e-10	1.33822e-08	yes
Unigene0002805	635.5	277.5	4.5658	2.07005	-1.1412	1.90081e-08	5.03556e-07	yes
Unigene0002806	1986.5	4370.5	16.0404	36.2824	1.17756	1.27656e-17	9.04569e-16	yes
Unigene0002811	60	19	1.7973	0.59235	-1.60131	0.000796387	0.00822173	yes
Unigene0002817	49	8.5	0.62095	0.11415	-2.44355	3.43938e-05	0.000507113	yes
Unigene0002818	60.5	19	0.75955	0.2478	-1.61597	0.000733303	0.00766375	yes
Unigene0002819	20.5	2.5	0.909	0.11705	-2.95716	0.00112816	0.0111101	yes
Unigene0002821	68.5	12	0.48295	0.0896	-2.4303	2.43972e-06	4.53929e-05	yes
Unigene0002830	53.5	8	1.16315	0.1747	-2.73509	3.43581e-06	6.20416e-05	yes
Unigene0002835	540	1153.5	3.12785	6.93605	1.14894	1.07103e-14	5.7887e-13	yes
Unigene0002845	84.5	30	1.0508	0.3985	-1.39884	0.00490556	0.0390019	yes
Unigene0002869	291	42	1.75115	0.26085	-2.74701	1.32016e-17	9.33062e-16	yes
Unigene0002894	3913	1321.5	69.1485	23.9652	-1.52876	5.90722e-26	7.59112e-24	yes
Unigene0002895	17	0	0.47585	0.001	-8.89436	0.00563031	0.0435762	yes
Unigene0002904	64	11	0.58975	0.10285	-2.51956	8.7287e-07	1.75366e-05	yes
Unigene0002906	153.5	67.5	3.2093	1.4838	-1.11296	0.000621686	0.00662407	yes
Unigene0002917	110.5	49	2.05595	0.94435	-1.12241	0.0012056	0.011753	yes
Unigene0002925	1979	839.5	9.69905	4.2859	-1.17825	1.02377e-17	7.32028e-16	yes
Unigene0003021	1440.5	5891.5	34.4464	144.942	2.07306	2.39829e-57	1.24731e-54	yes
Unigene0003026	13	0	0.37745	0.001	-8.56014	0.000739382	0.0077185	yes
Unigene0003058	165.5	63.5	3.54995	1.42605	-1.31577	0.0011872	0.0116045	yes
Unigene0003074	5	31	0.13825	0.91555	2.72736	0.00119419	0.0116583	yes
Unigene0003103	128.5	20.5	4.0413	0.6626	-2.60861	2.86302e-08	7.40317e-07	yes
Unigene0003104	74	10	3.33835	0.4875	-2.77566	7.0801e-07	1.44402e-05	yes
Unigene0003105	82	25	3.4333	1.059	-1.69689	0.000196139	0.0023749	yes
Unigene0003106	1062	190.5	27.1907	5.03215	-2.43386	7.871e-42	2.43775e-39	yes
Unigene0003112	1	17	0.0404	0.7131	4.14168	0.00116969	0.0114638	yes
Unigene0003131	1927.5	769	9.4272	3.8858	-1.27862	1.83746e-16	1.18062e-14	yes
Unigene0003139	31.5	5.5	1.61715	0.2755	-2.55333	0.00272916	0.0236603	yes
Unigene0003152	251	72.5	1.9035	0.5684	-1.74368	5.88506e-11	2.16292e-09	yes
Unigene0003179	582.5	37.5	12.3584	0.7541	-4.03459	0.00240203	0.0212146	yes
Unigene0003194	28	1	2.5845	0.09445	-4.77419	0.00012926	0.00164611	yes
Unigene0003199	315.5	138	1.99875	0.88915	-1.1686	9.97418e-05	0.00130424	yes
Unigene0003202	65.5	206.5	2.56315	8.5034	1.73012	1.16406e-07	2.71462e-06	yes
Unigene0003203	64	22.5	0.68615	0.25175	-1.44653	0.001136	0.0111753	yes
Unigene0003223	254	16.5	10.9624	0.74585	-3.87753	3.85987e-29	6.18577e-27	yes
Unigene0003235	919.5	3009	29.4156	100.357	1.77049	2.87725e-40	8.09286e-38	yes
Unigene0003242	118.5	32	1.11125	0.31865	-1.80214	3.26798e-05	0.000484303	yes
Unigene0003243	319	65	7.38785	1.56765	-2.23655	6.18119e-18	4.48963e-16	yes
Unigene0003309	6043.5	1321.5	33.9111	7.66895	-2.14466	2.20471e-82	2.70097e-79	yes
Unigene0003369	45	90.5	4.0867	8.4505	1.0481	0.00342035	0.0287396	yes
Unigene0003379	23	97.5	0.5598	2.4605	2.13597	7.62049e-07	1.54566e-05	yes
Unigene0003397	0	87	0.001	5.45895	12.4144	1.88827e-10	6.49804e-09	yes
Unigene0003398	1621.5	708.5	26.6048	12.1227	-1.13397	7.70363e-15	4.24693e-13	yes
Unigene0003403	225634	450848	3237.49	6672.6	1.04337	3.70256e-16	2.30642e-14	yes
Unigene0003413	5363.5	655.5	89.0618	11.298	-2.97874	5.48948e-132	1.89144e-128	yes
Unigene0003425	34103	72493.5	458.646	1003.58	1.1297	3.05751e-23	3.26662e-21	yes
Unigene0003449	25	0	0.9167	0.001	-9.84031	0.00171302	0.0159414	yes
Unigene0003456	268	62.5	1.2526	0.30045	-2.05973	9.95694e-14	4.94519e-12	yes
Unigene0003469	451.5	1420.5	24.6849	81.4934	1.72306	2.46908e-19	1.98134e-17	yes
Unigene0003481	905.5	4024.5	44.3837	206.136	2.2155	1.56931e-52	6.97695e-50	yes
Unigene0003493	89.5	187.5	1.3711	2.9903	1.12496	4.01628e-05	0.000582974	yes
Unigene0003499	120.5	56	2.0224	0.9837	-1.03978	0.00205564	0.0186176	yes
Unigene0003522	3055.5	1073	17.8309	6.5183	-1.45181	9.1262e-31	1.61256e-28	yes
Unigene0003526	58.5	19	0.69135	0.22545	-1.61661	0.00348949	0.0292314	yes
Unigene0003567	43.5	3	1.1091	0.081	-3.77532	3.31648e-07	7.15594e-06	yes
Unigene0003569	4205	2019	46.7615	23.2164	-1.01017	9.74071e-20	8.1363e-18	yes
Unigene0003576	24	3.5	0.40615	0.0592	-2.77834	0.00240817	0.0212526	yes
Unigene0003579	12.5	58.5	0.23955	1.17915	2.29935	1.16794e-05	0.000190506	yes
Unigene0003584	93.5	26	1.29425	0.38755	-1.73966	0.000766138	0.00794814	yes
Unigene0003595	269	89.5	1.4438	0.50805	-1.50683	1.40882e-05	0.000225711	yes
Unigene0003596	0	12	0.001	0.3966	8.63154	0.000713336	0.00746923	yes
Unigene0003599	83.5	15.5	1.0059	0.19765	-2.34747	8.8578e-07	1.77895e-05	yes
Unigene0003603	1566	736	37.6386	18.3054	-1.03995	1.71831e-14	9.13231e-13	yes
Unigene0003615	28.5	2.5	0.943	0.08025	-3.55468	0.00010639	0.00138329	yes
Unigene0003618	3573	311.5	111.716	10.0897	-3.46889	1.31417e-17	9.30022e-16	yes
Unigene0003625	0	9.5	0.001	0.6463	9.33606	0.00466324	0.0373717	yes
Unigene0003647	138	62	3.28335	1.537	-1.09505	0.000423024	0.00468762	yes
Unigene0003651	464.5	89.5	5.45395	1.08145	-2.33433	1.10385e-19	9.1648e-18	yes
Unigene0003652	924.5	140	9.9566	1.55085	-2.68259	1.7777e-42	5.69784e-40	yes
Unigene0003657	907	130.5	23.1102	3.47225	-2.73459	2.63213e-44	9.36171e-42	yes
Unigene0003666	117.5	47	2.529	1.0678	-1.24393	0.00110331	0.0109082	yes
Unigene0003669	414.5	89.5	9.4101	2.11435	-2.154	7.7496e-20	6.53254e-18	yes
Unigene0003676	124.5	17	6.1239	0.89605	-2.7728	3.92635e-09	1.13804e-07	yes
Unigene0003682	132	27.5	5.67625	1.22225	-2.2154	6.19397e-10	1.99223e-08	yes
Unigene0003683	307	62	9.65165	2.01915	-2.25703	1.06677e-17	7.59818e-16	yes
Unigene0003684	2594	591.5	26.9832	6.4127	-2.07306	7.41774e-50	3.09797e-47	yes
Unigene0003686	541	97.5	14.6168	2.75085	-2.40968	1.34408e-24	1.55995e-22	yes
Unigene0003690	192.5	27	9.1651	1.34755	-2.76581	1.32163e-15	7.82602e-14	yes
Unigene0003693	732.5	250	11.1849	4.0191	-1.4766	1.14755e-10	4.05795e-09	yes
Unigene0003716	1637	704.5	11.2613	4.98785	-1.17488	1.03182e-09	3.21625e-08	yes
Unigene0003761	119	42	5.96795	2.25615	-1.40337	0.00210099	0.0189443	yes
Unigene0003763	27.5	0	0.88635	0.001	-9.79173	3.59457e-07	7.70471e-06	yes
Unigene0003779	102	47	0.99935	0.47585	-1.07048	0.00281218	0.0242732	yes
Unigene0003804	607.5	2889.5	12.7066	62.7133	2.30319	1.61076e-51	7.0476e-49	yes
Unigene0003814	27.5	5	0.58735	0.11115	-2.40171	0.000808265	0.00832876	yes
Unigene0003824	92	35	2.9987	1.19025	-1.33307	0.00031565	0.00361327	yes
Unigene0003834	573	165.5	12.1832	3.6537	-1.73746	2.75984e-13	1.30935e-11	yes
Unigene0003840	66.5	22.5	0.61255	0.21915	-1.48291	0.00132153	0.0127213	yes
Unigene0003849	1061.5	281	6.74735	1.86165	-1.85774	1.46629e-23	1.6007e-21	yes
Unigene0003851	14.5	0.5	0.688	0.0265	-4.69834	0.000965905	0.00972236	yes
Unigene0003870	1810	6736	25.6218	98.8961	1.94854	1.06871e-76	1.03363e-73	yes
Unigene0003872	29.5	5.5	1.3072	0.25565	-2.35424	0.000619479	0.00660311	yes
Unigene0003892	91	0	1.90155	0.001	-10.893	7.59822e-05	0.00102413	yes
Unigene0003976	5977	2234	76.9604	29.7397	-1.37173	1.39793e-35	3.13277e-33	yes
Unigene0003981	69.5	14	2.5108	0.52105	-2.26865	7.6188e-06	0.000128682	yes
Unigene0003994	686.5	4.5	8.94345	0.0583	-7.26119	1.51373e-11	5.95224e-10	yes
Unigene0004016	923	2002	21.4459	48.2386	1.16948	6.4397e-13	2.93643e-11	yes
Unigene0004022	156	66.5	1.80945	0.79555	-1.18553	0.000133135	0.00168833	yes
Unigene0004024	41.5	428.5	0.436	4.65045	3.41497	1.12675e-37	2.81071e-35	yes
Unigene0004026	1	46	0.0361	1.7131	5.56847	1.83022e-09	5.52564e-08	yes
Unigene0004029	1959	796.5	17.9586	7.51215	-1.25738	5.16244e-17	3.48348e-15	yes
Unigene0004043	1	19	0.0264	0.50535	4.25867	0.000224048	0.0026735	yes
Unigene0004046	25.5	0	0.9138	0.001	-9.83573	2.55896e-07	5.61597e-06	yes
Unigene0004057	84	12	0.84965	0.1276	-2.73524	8.12307e-09	2.26056e-07	yes
Unigene0004058	153	63.5	1.0594	0.4632	-1.19354	0.00313099	0.026633	yes
Unigene0004076	3300	9364	14.3181	42.0963	1.55585	1.56938e-44	5.69201e-42	yes
Unigene0004080	42	5	1.83115	0.21705	-3.07665	8.6981e-06	0.000145308	yes
Unigene0004092	76	9.5	1.4322	0.1809	-2.98497	2.37674e-08	6.21571e-07	yes
Unigene0004096	54.5	5	1.5254	0.1398	-3.44775	5.73578e-08	1.4035e-06	yes
Unigene0004099	266.5	97.5	1.987	0.7547	-1.39662	3.91193e-08	9.88363e-07	yes
Unigene0004100	37	8	0.561	0.1276	-2.13637	0.00163537	0.0153067	yes
Unigene0004119	302.5	72	1.93835	0.4776	-2.02095	3.11207e-08	7.99093e-07	yes
Unigene0004121	69	1	2.0802	0.03275	-5.98908	0.000216233	0.00259314	yes
Unigene0004131	1052	280.5	6.107	1.69895	-1.84582	2.12907e-27	3.01731e-25	yes
Unigene0004134	72.5	212	1.6596	4.89275	1.55981	0.000110167	0.00142669	yes
Unigene0004171	229.5	109	1.23315	0.59995	-1.03943	0.000333271	0.00379136	yes
Unigene0004177	37	6	0.67205	0.11055	-2.60387	7.58648e-05	0.00102308	yes
Unigene0004191	142.5	11	0.70645	0.05575	-3.66354	2.43928e-18	1.81478e-16	yes
Unigene0004195	443.5	8.5	14.0044	0.26925	-5.70078	1.21275e-57	6.36739e-55	yes
Unigene0004220	234	113	1.8433	0.9177	-1.0062	0.000643139	0.00682364	yes
Unigene0004223	41	10	0.85395	0.22515	-1.92327	0.00534923	0.0418889	yes
Unigene0004226	21	0	0.7122	0.001	-9.47614	8.3121e-06	0.00013954	yes
Unigene0004268	14	49.5	0.2326	0.84755	1.86545	0.000204165	0.00245953	yes
Unigene0004272	18.5	0	0.651	0.001	-9.34651	0.00433377	0.0351797	yes
Unigene0004276	41.5	0	0.8016	0.001	-9.64674	0.000419413	0.0046548	yes
Unigene0004284	7	41.5	0.13545	0.80515	2.5715	0.000552081	0.00596194	yes
Unigene0004287	415	49	7.6231	0.9169	-3.05554	2.06539e-22	2.08159e-20	yes
Unigene0004294	1698.5	806	13.93	6.8965	-1.01426	1.97196e-12	8.58029e-11	yes
Unigene0004295	677.5	274	18.1303	7.6229	-1.24999	2.24901e-10	7.65344e-09	yes
Unigene0004296	480	135	5.92945	1.70515	-1.798	2.35698e-12	1.01119e-10	yes
Unigene0004310	285	91	2.3229	0.78585	-1.5636	1.33186e-06	2.5954e-05	yes
Unigene0004315	56	17.5	2.3401	0.76935	-1.60486	0.00138021	0.0132307	yes
Unigene0004317	9	0	0.37995	0.001	-8.56967	0.0064174	0.0486369	yes
Unigene0004319	635	288	8.4302	3.9891	-1.0795	3.23103e-08	8.28866e-07	yes
Unigene0004326	17.5	1.5	0.72345	0.0686	-3.39861	0.00252445	0.0221186	yes
Unigene0004328	246.5	70	2.4696	0.73735	-1.74386	6.68328e-07	1.36815e-05	yes
Unigene0004337	3143.5	10174	44.7463	149.384	1.73918	4.95267e-56	2.48214e-53	yes
Unigene0004338	29.5	74.5	0.2717	0.72305	1.41208	0.00381314	0.0315306	yes
Unigene0004345	42	136	0.8906	3.007	1.75548	1.17232e-06	2.30901e-05	yes
Unigene0004358	76400.5	201322	455.188	1241.25	1.44726	1.43512e-41	4.37109e-39	yes
Unigene0004377	1024.5	2624	7.3103	19.3328	1.40304	6.7547e-26	8.66e-24	yes
Unigene0004383	16	0	0.80725	0.001	-9.65687	0.0066306	0.0499888	yes
Unigene0004400	1250	551.5	6.165	2.83605	-1.12022	1.35812e-11	5.371e-10	yes
Unigene0004428	406	793	17.8517	35.8946	1.0077	1.73059e-07	3.91327e-06	yes
Unigene0004436	67	14.5	1.3337	0.29725	-2.16569	1.67886e-05	0.000264289	yes
Unigene0004453	46.5	238.5	0.8145	4.26615	2.38895	3.6077e-12	1.51824e-10	yes
Unigene0004470	95.5	30	3.61675	1.20445	-1.58632	0.000188398	0.00229428	yes
Unigene0004498	187	74	4.31315	1.8079	-1.25443	0.000663098	0.00700574	yes
Unigene0004510	28.5	77.5	0.32085	0.90175	1.49083	0.000191812	0.00232781	yes
Unigene0004511	81	26.5	1.14955	0.3983	-1.52914	0.000432524	0.00477761	yes
Unigene0004522	17	2	0.57305	0.06955	-3.04254	0.0042732	0.0347973	yes
Unigene0004523	7.5	32	0.2653	1.16165	2.13048	0.00210751	0.0189851	yes
Unigene0004525	318.5	1.5	1.27655	0.006	-7.73307	9.77542e-05	0.00127946	yes
Unigene0004531	1447.5	507	54.8445	19.8204	-1.46836	1.01193e-22	1.05258e-20	yes
Unigene0004536	95.5	7.5	0.78565	0.0628	-3.64505	1.24792e-09	3.84125e-08	yes
Unigene0004541	15.5	0.5	0.39445	0.0125	-4.97984	0.00118529	0.011594	yes
Unigene0004545	232	86.5	2.9292	1.1437	-1.3568	9.99474e-07	1.99133e-05	yes
Unigene0004551	20	0	0.59615	0.001	-9.21953	0.000196251	0.00237542	yes
Unigene0004570	45	0	1.56775	0.001	-10.6145	0.000344545	0.00390934	yes
Unigene0004578	3	88.5	0.05135	1.5464	4.91241	1.1415e-12	5.09964e-11	yes
Unigene0004609	1	78	0.0418	3.1632	6.24174	5.78265e-10	1.86479e-08	yes
Unigene0004617	138.5	46.5	5.49575	1.90095	-1.5316	3.61209e-05	0.000529886	yes
Unigene0004627	172	49	3.20825	0.94765	-1.75936	4.65998e-08	1.1593e-06	yes
Unigene0004646	1	61.5	0.01655	1.06125	6.00279	1.60307e-10	5.56873e-09	yes
Unigene0004656	2010	567	17.386	5.015	-1.7936	7.61042e-14	3.80721e-12	yes
Unigene0004657	170.5	19.5	6.8004	0.8062	-3.07641	2.62984e-16	1.67221e-14	yes
Unigene0004663	9	76.5	0.1807	1.58295	3.13095	4.11927e-08	1.03742e-06	yes
Unigene0004681	128	32	1.06935	0.27745	-1.94643	2.65317e-08	6.89611e-07	yes
Unigene0004690	68996.5	196515	571.698	1681.98	1.55684	5.75122e-58	3.07824e-55	yes
Unigene0004692	131.5	46	1.3381	0.4931	-1.44023	6.47466e-05	0.000890842	yes
Unigene0004720	19.5	0	0.7003	0.001	-9.45183	0.00366723	0.0304841	yes
Unigene0004728	595	166.5	2.7821	0.8154	-1.77059	7.97169e-10	2.52277e-08	yes
Unigene0004729	6	28	0.1549	0.76905	2.31174	0.00224438	0.0200519	yes
Unigene0004731	940	440.5	24.2846	11.8066	-1.04045	1.19844e-11	4.75658e-10	yes
Unigene0004742	1089.5	480.5	27.3795	12.5597	-1.12429	7.04088e-14	3.5287e-12	yes
Unigene0004744	24.5	3.5	0.6822	0.1018	-2.74446	0.00108562	0.0107623	yes
Unigene0004745	132.5	344	3.0828	8.30075	1.429	5.17672e-10	1.67579e-08	yes
Unigene0004749	801.5	126.5	11.4733	1.89385	-2.59888	7.52249e-36	1.72795e-33	yes
Unigene0004752	4	27	0.0985	0.7013	2.83184	0.000412318	0.00459226	yes
Unigene0004758	29	0.5	0.4863	0.0082	-5.89008	3.1131e-06	5.67346e-05	yes
Unigene0004778	237.5	82	6.4831	2.30655	-1.49095	2.80992e-08	7.27608e-07	yes
Unigene0004798	18.5	2	0.44875	0.05085	-3.14159	0.00196735	0.0179567	yes
Unigene0004805	213.5	53	2.36475	0.60615	-1.96394	2.96307e-08	7.64037e-07	yes
Unigene0004814	457	61.5	15.1096	2.1226	-2.83156	1.37389e-08	3.72376e-07	yes
Unigene0004816	242	108.5	3.70655	1.7414	-1.08983	5.04172e-05	0.000712496	yes
Unigene0004817	58	11	1.5812	0.30015	-2.39726	7.42009e-05	0.00100457	yes
Unigene0004818	182.5	75	7.60825	3.2092	-1.24535	5.53747e-05	0.000776742	yes
Unigene0004821	83.5	33.5	1.25405	0.5247	-1.25703	0.000937508	0.00949025	yes
Unigene0004823	2231	1011.5	11.0337	5.18315	-1.09002	1.42319e-17	1.00146e-15	yes
Unigene0004835	146	61.5	6.0497	2.6729	-1.17846	0.00038453	0.00431659	yes
Unigene0004837	91	29	4.53315	1.4596	-1.63494	0.000267008	0.00312193	yes
Unigene0004844	105.5	50	4.0576	2.00335	-1.01821	0.00278063	0.0240385	yes
Unigene0004847	642	244	10.3288	4.0902	-1.33644	1.76781e-12	7.71635e-11	yes
Unigene0004862	31	72.5	0.41595	0.9947	1.25785	0.00379142	0.0313845	yes
Unigene0004867	47	9	0.82945	0.164	-2.33846	0.00318931	0.0270623	yes
Unigene0004870	204.5	78	1.8227	0.7202	-1.33961	6.67708e-06	0.000114246	yes
Unigene0004880	78.5	6	0.95605	0.07255	-3.72004	1.18222e-10	4.17518e-09	yes
Unigene0004892	77	165	1.7585	3.9544	1.16911	0.000308165	0.00353983	yes
Unigene0004899	238.5	110.5	2.10945	1.00975	-1.06287	8.45745e-05	0.00112737	yes
Unigene0004907	171	48.5	1.33325	0.39215	-1.76547	1.48679e-08	4.00415e-07	yes
Unigene0004913	79.5	21	0.72315	0.2029	-1.83353	0.000189189	0.00230147	yes
Unigene0004920	130	447.5	0.92405	3.27355	1.82481	1.49833e-13	7.33584e-12	yes
Unigene0004922	601.5	87.5	7.4277	1.09605	-2.7606	3.57112e-20	3.12992e-18	yes
Unigene0004926	1042.5	314.5	10.5345	3.3022	-1.67363	5.16933e-26	6.6584e-24	yes
Unigene0004939	70.5	0	0.89085	0.001	-9.79904	0.000121845	0.00156032	yes
Unigene0004945	6	38	0.0862	0.5665	2.71632	4.77811e-05	0.000680477	yes
Unigene0004948	29	87.5	0.287	0.87715	1.61177	0.000389389	0.00436137	yes
Unigene0004966	48.5	10.5	0.994	0.23175	-2.10068	0.00164486	0.0153772	yes
Unigene0004970	104	49.5	1.20305	0.6005	-1.00246	0.00460389	0.0369713	yes
Unigene0004972	140.5	23.5	2.09935	0.3641	-2.52754	9.21462e-08	2.1821e-06	yes
Unigene0004975	22.5	3	0.312	0.04245	-2.87771	0.000952074	0.00961826	yes
Unigene0004990	948.5	130	22.5298	3.18995	-2.82023	1.94259e-26	2.56818e-24	yes
Unigene0004995	124	43.5	0.8907	0.3208	-1.47327	4.29533e-05	0.000619239	yes
Unigene0004998	8.5	40.5	0.189	0.89325	2.24068	0.00554502	0.0431402	yes
Unigene0005019	57	14	0.7566	0.1953	-1.95384	0.000578869	0.00622197	yes
Unigene0005022	278	82.5	2.8381	0.87715	-1.69403	6.29398e-09	1.77393e-07	yes
Unigene0005030	44.5	6	0.41775	0.0561	-2.89657	2.46897e-05	0.000375274	yes
Unigene0005042	238.5	539	2.3407	5.4954	1.23128	1.55825e-10	5.42328e-09	yes
Unigene0005056	163	55	1.13625	0.40555	-1.48633	3.01994e-05	0.00044972	yes
Unigene0005059	260	111	2.74635	1.2145	-1.17715	0.000184457	0.00225335	yes
Unigene0005062	53.5	256.5	0.39295	1.9499	2.31098	6.98028e-17	4.65316e-15	yes
Unigene0005064	246	108	2.66315	1.2236	-1.122	0.00183257	0.0168915	yes
Unigene0005066	1225	563	9.55145	4.5676	-1.06428	1.2408e-12	5.51644e-11	yes
Unigene0005072	864.5	1686.5	6.1227	12.3625	1.01372	4.03931e-12	1.68827e-10	yes
Unigene0005078	956	357	5.7569	2.23705	-1.36369	1.06785e-16	6.99994e-15	yes
Unigene0005081	83	21	2.2212	0.58825	-1.91684	2.46394e-05	0.000374716	yes
Unigene0005082	190.5	55.5	1.57085	0.47835	-1.71541	1.7608e-08	4.68039e-07	yes
Unigene0005090	232	31	2.3192	0.3176	-2.86834	4.62833e-19	3.65552e-17	yes
Unigene0005094	672	276	3.8326	1.6321	-1.23159	4.40867e-12	1.82741e-10	yes
Unigene0005100	208	410.5	2.13915	4.36545	1.02909	9.76426e-05	0.0012783	yes
Unigene0005104	133.5	11	0.99795	0.0859	-3.53824	5.60519e-16	3.44491e-14	yes
Unigene0005106	23	165	0.2568	1.8228	2.82744	9.60325e-06	0.000159367	yes
Unigene0005107	148	22	1.22405	0.185	-2.72607	7.56396e-12	3.06163e-10	yes
Unigene0005124	3506.5	701	46.9817	9.80245	-2.26089	2.2998e-58	1.26785e-55	yes
Unigene0005133	30	406.5	0.36675	5.16135	3.81488	1.013e-35	2.29818e-33	yes
Unigene0005134	168.5	540.5	1.8607	6.15585	1.72611	5.78369e-09	1.63848e-07	yes
Unigene0005139	6.5	68	0.09345	1.0139	3.43958	1.56285e-09	4.76012e-08	yes
Unigene0005145	93.5	13.5	1.49	0.2312	-2.6881	3.16863e-07	6.86382e-06	yes
Unigene0005150	13	36	0.22285	0.6362	1.51341	0.0056014	0.0434623	yes
Unigene0005153	57.5	0	1.23605	0.001	-10.2715	0.00018999	0.00230907	yes
Unigene0005156	59	21.5	1.41215	0.54435	-1.37529	0.0064874	0.0490847	yes
Unigene0005161	168.5	52	2.3155	0.7385	-1.64865	5.38161e-08	1.32448e-06	yes
Unigene0005167	149	7	1.86905	0.08655	-4.43263	8.5976e-17	5.68318e-15	yes
Unigene0005171	716	172	8.20455	2.0497	-2.00101	4.86717e-26	6.2839e-24	yes
Unigene0005177	126	43.5	1.0908	0.39365	-1.4704	2.42307e-05	0.000369213	yes
Unigene0005178	62	19.5	0.539	0.1802	-1.58069	0.00167839	0.0156588	yes
Unigene0005180	161	352.5	0.94295	2.16265	1.19755	1.04777e-06	2.08003e-05	yes
Unigene0005182	143.5	52.5	2.6393	0.97275	-1.44001	0.000542112	0.00586346	yes
Unigene0005194	859	246	15.5234	4.6255	-1.74676	9.87116e-24	1.0862e-21	yes
Unigene0005195	3921	495.5	41.3633	5.0894	-3.02278	1.17229e-05	0.00019104	yes
Unigene0005204	75	30	1.48935	0.62395	-1.25518	0.00340849	0.0286575	yes
Unigene0005207	31.5	99.5	0.4229	1.39295	1.71976	0.000139211	0.00175658	yes
Unigene0005211	53.5	193	0.42585	1.57345	1.88551	1.07302e-08	2.95182e-07	yes
Unigene0005214	2978.5	1325.5	12.3833	5.68415	-1.12337	2.25901e-15	1.30954e-13	yes
Unigene0005216	191	86	1.56095	0.7365	-1.08367	0.000186158	0.00227101	yes
Unigene0005219	31	0	0.5925	0.001	-9.21067	7.13094e-07	1.45331e-05	yes
Unigene0005220	168.5	42	7.9565	2.0984	-1.92284	5.30233e-07	1.1064e-05	yes
Unigene0005221	79	19.5	3.1482	0.80485	-1.96774	3.36652e-06	6.093e-05	yes
Unigene0005223	227.5	89.5	1.48075	0.60235	-1.29765	1.50519e-06	2.90443e-05	yes
Unigene0005229	147	53	2.2102	0.8113	-1.44587	4.52099e-05	0.000648719	yes
Unigene0005247	31	0	0.88915	0.001	-9.79628	0.000938802	0.00949842	yes
Unigene0005253	101	4	4.9417	0.20685	-4.57835	4.54085e-17	3.0678e-15	yes
Unigene0005254	33	97	0.8431	2.54315	1.59284	5.79976e-05	0.000809661	yes
Unigene0005255	216	65	2.40205	0.7337	-1.711	6.22807e-07	1.28354e-05	yes
Unigene0005288	98.5	512	2.0582	11.0462	2.4241	3.88381e-18	2.86244e-16	yes
Unigene0005299	684.5	173.5	18.5469	4.86865	-1.92959	1.4242e-17	1.00146e-15	yes
Unigene0005312	62	15	0.74715	0.1862	-2.00454	2.82602e-05	0.000423933	yes
Unigene0005315	226	101	2.0792	0.98215	-1.08201	0.001471	0.0139722	yes
Unigene0005316	3	25	0.0825	0.67805	3.03893	0.00196711	0.0179567	yes
Unigene0005328	28158	9020.5	448.233	149.641	-1.58275	5.5163e-43	1.83198e-40	yes
Unigene0005330	440.5	207.5	4.0989	2.0215	-1.01981	4.43057e-06	7.85631e-05	yes
Unigene0005334	313	65	6.2024	1.3323	-2.21891	3.96587e-17	2.68923e-15	yes
Unigene0005338	251	19.5	4.2809	0.3366	-3.66881	1.72044e-06	3.27961e-05	yes
Unigene0005339	97	46	1.2075	0.5932	-1.02543	0.00296219	0.025382	yes
Unigene0005359	22.5	108	0.69055	3.36965	2.28678	2.69876e-07	5.90866e-06	yes
Unigene0005404	105.5	34.5	0.7496	0.2568	-1.54548	3.39779e-05	0.000501787	yes
Unigene0005415	327.5	714.5	3.13225	7.07065	1.17464	6.58242e-10	2.10611e-08	yes
Unigene0005417	2812.5	1060.5	7.3949	2.8977	-1.35162	9.14923e-28	1.32205e-25	yes
Unigene0005419	132.5	449	0.9318	3.2901	1.82004	3.67278e-09	1.06904e-07	yes
Unigene0005425	276.5	105	7.93995	3.23905	-1.29356	0.00192378	0.0175997	yes
Unigene0005431	0	149.5	0.001	3.31135	11.6932	1.03842e-24	1.22062e-22	yes
Unigene0005443	0	25	0.001	0.7376	9.52669	2.99137e-05	0.000445961	yes
Unigene0005446	8180.5	2642	50.7452	16.9843	-1.57906	7.54905e-54	3.49724e-51	yes
Unigene0005448	44	14	1.32685	0.43305	-1.6154	0.00266687	0.0231859	yes
Unigene0005456	1348.5	189.5	10.3381	1.5105	-2.77487	4.28004e-63	2.59291e-60	yes
Unigene0005460	187	32	5.9304	1.0768	-2.46138	1.03989e-10	3.71536e-09	yes
Unigene0005493	10	0	0.36525	0.001	-8.51274	0.00410279	0.0335532	yes
Unigene0005504	143.5	29	1.29975	0.26595	-2.28901	2.21706e-08	5.82297e-07	yes
Unigene0005510	15	1	0.40415	0.03025	-3.73988	0.00331378	0.0280036	yes
Unigene0005533	21	3.5	0.6594	0.11325	-2.54164	0.0026609	0.0231376	yes
Unigene0005538	741	187.5	3.1297	0.8277	-1.91884	1.01818e-21	9.91715e-20	yes
Unigene0005544	34.5	0.5	0.6298	0.0099	-5.99132	0.00239564	0.0211649	yes
Unigene0005547	6774.5	3215.5	41.7919	20.5531	-1.02387	7.29756e-24	8.12742e-22	yes
Unigene0005559	9	38	0.1674	0.7272	2.11905	0.000473242	0.00518057	yes
Unigene0005580	4	165	0.0454	1.90345	5.38978	9.97603e-27	1.34467e-24	yes
Unigene0005582	49	110.5	1.63575	3.8407	1.23142	0.000491485	0.00536643	yes
Unigene0005584	37	0	0.3148	0.001	-8.29829	1.07581e-09	3.34622e-08	yes
Unigene0005593	4	25.5	0.1319	0.87165	2.7243	0.000463904	0.00508542	yes
Unigene0005597	32.5	0.5	0.77455	0.01155	-6.06739	3.83373e-08	9.7083e-07	yes
Unigene0005599	2660	6390.5	33.8657	83.7648	1.30652	6.34239e-25	7.60108e-23	yes
Unigene0005628	34.5	2	0.55575	0.0314	-4.1456	5.37229e-06	9.38729e-05	yes
Unigene0005641	112	51.5	0.90025	0.42685	-1.0766	0.00139347	0.01333	yes
Unigene0005642	115.5	513	0.80405	3.65755	2.18552	1.04096e-15	6.24453e-14	yes
Unigene0005643	11	36.5	0.3555	1.2074	1.76398	0.00459797	0.0369453	yes
Unigene0005644	35.5	163	0.9291	4.38895	2.23997	6.68694e-11	2.44459e-09	yes
Unigene0005662	30.5	0	1.0469	0.001	-10.0319	0.000974136	0.00979912	yes
Unigene0005664	2.5	52	0.0324	0.7033	4.44007	4.56409e-08	1.13801e-06	yes
Unigene0005668	474.5	221	3.0766	1.477	-1.05867	1.94371e-07	4.35733e-06	yes
Unigene0005673	63	19	0.7419	0.2366	-1.64877	0.000417043	0.00463251	yes
Unigene0005674	396	189.5	9.2679	4.5741	-1.01875	2.61369e-06	4.83037e-05	yes
Unigene0005682	396	175	1.41885	0.6546	-1.11604	4.43122e-07	9.37048e-06	yes
Unigene0005706	61.5	12	0.82795	0.1696	-2.28741	4.58495e-05	0.000656358	yes
Unigene0005739	64.5	0	1.19805	0.001	-10.2265	2.14693e-09	6.42551e-08	yes
Unigene0005749	108.5	47.5	1.68675	0.76905	-1.1331	0.00348879	0.02923	yes
Unigene0005764	6.5	35	0.15955	0.88205	2.46685	0.000147626	0.00185218	yes
Unigene0005822	3042	1375	26.8398	12.6435	-1.08597	3.88989e-17	2.64096e-15	yes
Unigene0005824	423.5	199.5	9.66245	4.7457	-1.02577	1.16286e-06	2.29201e-05	yes
Unigene0005856	119	32.5	2.36145	0.65505	-1.85	1.95272e-05	0.0003035	yes
Unigene0005881	286.5	35	1.95735	0.244	-3.00395	1.3726e-20	1.2405e-18	yes
Unigene0005882	41	9.5	0.77455	0.1835	-2.07758	0.0051453	0.0405801	yes
Unigene0005897	311	645.5	4.2123	9.05465	1.10405	4.28841e-08	1.07609e-06	yes
Unigene0005911	54.5	18.5	2.0472	0.7239	-1.49979	0.00141764	0.0135307	yes
Unigene0005916	6	34.5	0.21915	1.33245	2.60409	0.000162795	0.00201452	yes
Unigene0005917	1155.5	424	5.9943	2.3093	-1.37614	2.03963e-12	8.85375e-11	yes
Unigene0005929	1079.5	342.5	7.84065	2.56965	-1.6094	1.93196e-24	2.22353e-22	yes
Unigene0005934	32.5	79	0.48055	1.2124	1.33511	0.000551737	0.00595939	yes
Unigene0005937	1027	415.5	16.1028	6.7331	-1.25796	4.20222e-16	2.59713e-14	yes
Unigene0005971	4.5	24	0.1718	0.97885	2.51036	0.00279617	0.0241576	yes
Unigene0005975	275	8.5	10.9692	0.37005	-4.88959	1.70014e-27	2.41564e-25	yes
Unigene0005993	730	316.5	11.4621	5.14355	-1.15604	7.43998e-10	2.36403e-08	yes
Unigene0005995	2303	811	42.7311	15.6121	-1.45262	3.33589e-28	5.03848e-26	yes
Unigene0005996	1206	386.5	5.35285	1.77615	-1.59155	5.42783e-20	4.63923e-18	yes
Unigene0005997	52.5	15	3.9374	1.18145	-1.73668	0.000587909	0.00630926	yes
Unigene0005998	635	174	6.95515	1.98595	-1.80825	1.09017e-19	9.06486e-18	yes
Unigene0005999	2216.5	712	29.2972	9.78145	-1.58264	4.63179e-33	9.08704e-31	yes
Unigene0006000	293	83.5	14.5639	4.2639	-1.77215	4.40409e-11	1.6416e-09	yes
Unigene0006002	111	34.5	3.3023	1.06375	-1.63431	4.79118e-06	8.44348e-05	yes
Unigene0006006	58.5	23	1.7935	0.74375	-1.26989	0.00616111	0.0469722	yes
Unigene0006007	45.5	10	2.37775	0.541	-2.1359	8.28944e-05	0.00110812	yes
Unigene0006008	84.5	26.5	2.60625	0.85005	-1.61636	0.000140352	0.00176978	yes
Unigene0006009	510.5	242	11.0297	5.4456	-1.01824	5.54016e-07	1.15341e-05	yes
Unigene0006010	131.5	46	4.77065	1.725	-1.46759	0.000418385	0.00464461	yes
Unigene0006011	894	373	8.5768	3.7245	-1.20339	2.99311e-13	1.41881e-11	yes
Unigene0006012	58.5	14.5	5.12325	1.31265	-1.96458	4.45686e-05	0.000640017	yes
Unigene0006013	200	68.5	5.35865	1.92235	-1.479	9.18187e-07	1.83868e-05	yes
Unigene0006018	24.5	4.5	0.90285	0.1694	-2.41405	0.00465716	0.0373284	yes
Unigene0006025	1244.5	411.5	23.2461	7.9731	-1.54378	1.12236e-25	1.42241e-23	yes
Unigene0006026	1733	438	29.2634	7.67075	-1.93166	1.85177e-41	5.57849e-39	yes
Unigene0006027	160	46	5.0362	1.5036	-1.74391	1.19985e-07	2.79218e-06	yes
Unigene0006028	1465.5	404.5	20.2159	5.81235	-1.7983	5.07588e-30	8.53134e-28	yes
Unigene0006033	435.5	121	13.8731	3.9753	-1.80315	1.46757e-15	8.67154e-14	yes
Unigene0006034	11	0.5	0.6489	0.03285	-4.30403	0.00541542	0.0422931	yes
Unigene0006076	42.5	6.5	0.94695	0.1488	-2.66991	5.61626e-05	0.000786433	yes
Unigene0006082	891	159.5	71.1743	13.2053	-2.43024	1.01402e-38	2.71368e-36	yes
Unigene0006087	18	0.5	1.18635	0.0318	-5.22136	0.000131321	0.00166849	yes
Unigene0006097	55	6	0.686	0.07195	-3.25314	8.15893e-05	0.00109279	yes
Unigene0006113	579.5	214.5	9.28455	3.588	-1.37165	7.34544e-12	2.97974e-10	yes
Unigene0006123	10	0	0.3362	0.001	-8.39318	0.00244874	0.0215408	yes
Unigene0006130	807.5	2197	15.7262	43.7866	1.47732	7.54994e-17	5.00867e-15	yes
Unigene0006132	40	89	0.7763	1.79635	1.21038	0.000763132	0.00792463	yes
Unigene0006140	0	23.5	0.001	1.6585	10.6957	0.00179056	0.0165707	yes
Unigene0006150	386.5	1210.5	23.5847	77.5204	1.71672	6.34247e-15	3.52119e-13	yes
Unigene0006195	200.5	73.5	5.15555	1.95465	-1.39922	4.53395e-07	9.56938e-06	yes
Unigene0006198	1722	726	9.6724	4.2407	-1.18957	1.60587e-18	1.22448e-16	yes
Unigene0006212	246	34.5	3.5518	0.5115	-2.79574	1.64628e-15	9.67569e-14	yes
Unigene0006214	52	17	0.8487	0.2836	-1.5814	0.00224456	0.0200519	yes
Unigene0006217	3	18	0.10685	0.65655	2.61932	0.00554005	0.0431195	yes
Unigene0006234	115	28.5	1.55235	0.41175	-1.91461	4.40793e-05	0.00063332	yes
Unigene0006288	38466.5	77434.5	593.544	1229.87	1.05107	1.77918e-21	1.6882e-19	yes
Unigene0006297	172	83	4.31485	2.1517	-1.00383	0.000391946	0.00438822	yes
Unigene0006298	55.5	234	1.5981	7.03255	2.13769	2.10649e-13	1.01422e-11	yes
Unigene0006305	95	29.5	1.00055	0.3171	-1.65778	6.58505e-05	0.000904628	yes
Unigene0006308	6864	3224	38.514	18.8186	-1.03322	7.14558e-21	6.54366e-19	yes
Unigene0006338	5	39.5	0.1404	1.19245	3.08631	7.04693e-05	0.000961134	yes
Unigene0006351	171.5	24.5	4.24965	0.62875	-2.75679	2.02951e-15	1.18147e-13	yes
Unigene0006360	181.5	73	2.8087	1.18195	-1.24873	2.20186e-05	0.000338123	yes
Unigene0006404	566.5	213.5	20.3514	8.1319	-1.32346	2.92382e-05	0.000437059	yes
Unigene0006420	73.5	269.5	0.794	3.0096	1.92236	2.08902e-13	1.00846e-11	yes
Unigene0006421	34	1.5	0.96385	0.0449	-4.42402	2.04248e-06	3.85351e-05	yes
Unigene0006430	27.5	3	1.89995	0.21105	-3.1703	8.9477e-05	0.00118264	yes
Unigene0006459	4	151.5	0.14025	5.2372	5.22272	4.73417e-09	1.36003e-07	yes
Unigene0006464	91	5	4.79925	0.2707	-4.14804	3.5732e-15	2.0287e-13	yes
Unigene0006485	114	48	3.78275	1.66365	-1.18508	0.000600616	0.00642689	yes
Unigene0006500	200.5	60.5	1.61805	0.50975	-1.66639	9.56314e-09	2.63999e-07	yes
Unigene0006501	20	3	1.0279	0.16595	-2.63088	0.00540257	0.0422166	yes
Unigene0006507	130.5	53.5	2.79745	1.20945	-1.20976	0.000603138	0.00644888	yes
Unigene0006514	1.5	15.5	0.0503	0.5491	3.44844	0.00425186	0.0346542	yes
Unigene0006535	102	41.5	0.922	0.3927	-1.23134	0.000620464	0.00661232	yes
Unigene0006569	56	7	1.37605	0.18075	-2.92847	2.49456e-07	5.48555e-06	yes
Unigene0006580	53.5	134.5	3.64385	9.7109	1.41414	0.000316517	0.00362168	yes
Unigene0006582	471	180.5	4.61515	1.8553	-1.31473	1.72895e-08	4.60684e-07	yes
Unigene0006587	43.5	12	0.42865	0.12175	-1.81588	0.00653521	0.0493939	yes
Unigene0006599	142	26.5	2.39435	0.46835	-2.35398	9.94666e-11	3.56534e-09	yes
Unigene0006600	4697	2070	39.3318	17.9944	-1.12815	3.0063e-22	2.99159e-20	yes
Unigene0006603	53.5	106.5	1.0026	2.09465	1.06296	0.00424362	0.0345972	yes
Unigene0006614	81	20	0.9101	0.235	-1.95336	4.56562e-05	0.0006541	yes
Unigene0006627	465	104	5.6897	1.31305	-2.11543	0.00276114	0.0238925	yes
Unigene0006636	901.5	8641	6.50495	63.7726	3.29333	3.36133e-77	3.30905e-74	yes
Unigene0006673	355	1325.5	19.3342	74.7498	1.95092	2.14129e-37	5.22333e-35	yes
Unigene0006695	62.5	5.5	1.2907	0.1085	-3.57239	0.000125723	0.00160439	yes
Unigene0006697	27	5	1.1837	0.2229	-2.40883	0.00294503	0.0252656	yes
Unigene0006701	124	0	1.6936	0.001	-10.7259	4.54307e-05	0.00065164	yes
Unigene0006720	1698	635	18.3013	7.0972	-1.36663	4.35979e-24	4.91515e-22	yes
Unigene0006738	62.5	25.5	0.6831	0.2906	-1.23306	0.00349231	0.0292506	yes
Unigene0006739	231	68.5	2.0782	0.6533	-1.66952	2.67339e-06	4.93408e-05	yes
Unigene0006776	220	14.5	2.75645	0.1854	-3.8941	1.53538e-16	9.92309e-15	yes
Unigene0006787	259	98.5	2.23395	0.88695	-1.33267	2.82355e-06	5.19384e-05	yes
Unigene0006840	36.5	7	0.5668	0.1168	-2.2788	0.0006939	0.00728925	yes
Unigene0006873	84	27.5	1.32655	0.4567	-1.53836	0.00023549	0.0027937	yes
Unigene0006879	76	0	1.53895	0.001	-10.5877	0.000105216	0.00136997	yes
Unigene0006897	3267.5	7811	63.7144	157.579	1.30638	7.01072e-37	1.69515e-34	yes
Unigene0006901	8	44	0.2319	1.3804	2.57351	0.00124558	0.0120957	yes
Unigene0006907	17	142.5	0.40975	3.47005	3.08214	2.64711e-10	8.90376e-09	yes
Unigene0006922	91.5	200.5	4.3873	10.0633	1.19769	2.60955e-05	0.000394575	yes
Unigene0006928	22.5	3	1.1086	0.16465	-2.75126	0.00645797	0.0488772	yes
Unigene0006930	57	21	2.4385	0.94045	-1.37457	0.00237848	0.0210403	yes
Unigene0006933	40	2	0.76785	0.0398	-4.26998	8.83602e-08	2.09928e-06	yes
Unigene0006944	143.5	436	1.89525	5.986	1.6592	5.80389e-13	2.66636e-11	yes
Unigene0006959	223	30	4.1496	0.5656	-2.87512	1.14571e-10	4.05405e-09	yes
Unigene0006964	307	109.5	2.55805	0.9659	-1.4051	7.33326e-06	0.000124354	yes
Unigene0006966	39.5	11.5	1.74745	0.53275	-1.71372	0.00263454	0.0229302	yes
Unigene0006972	142.5	440	1.34755	4.3033	1.6751	9.71631e-15	5.28255e-13	yes
Unigene0006990	2	20.5	0.07115	0.76265	3.42209	0.000408044	0.00455273	yes
Unigene0007000	13	0	0.61995	0.001	-9.27601	0.00038628	0.00433182	yes
Unigene0007034	597.5	222.5	5.06535	1.96345	-1.36727	2.26994e-12	9.76126e-11	yes
Unigene0007044	5353.5	2215	55.791	23.8478	-1.22618	7.96323e-29	1.2543e-26	yes
Unigene0007081	24	68	0.62155	1.87345	1.59176	0.00150062	0.0142193	yes
Unigene0007089	257.5	18	2.82585	0.2058	-3.77937	1.52493e-09	4.64979e-08	yes
Unigene0007099	3212.5	1110.5	9.9098	3.5426	-1.48405	3.71534e-31	6.7376e-29	yes
Unigene0007115	1850	833	10.4563	4.899	-1.09381	5.57773e-16	3.43186e-14	yes
Unigene0007116	3987.5	1552	26.8896	10.8465	-1.30982	1.42678e-30	2.45802e-28	yes
Unigene0007118	57	141	3.37055	8.58045	1.34807	2.37452e-05	0.000362518	yes
Unigene0007146	399.5	131	5.79575	2.00195	-1.53359	7.45789e-08	1.79227e-06	yes
Unigene0007158	10	0	0.6947	0.001	-9.44025	0.00488439	0.0388559	yes
Unigene0007169	1.5	15.5	0.0618	0.66425	3.42605	0.0063792	0.0484006	yes
Unigene0007175	40.5	99	0.5234	1.3176	1.33193	0.00178161	0.0165045	yes
Unigene0007186	426.5	6	10.0834	0.1546	-6.0273	2.90605e-07	6.33231e-06	yes
Unigene0007247	1398.5	508	20.2016	7.62815	-1.40506	1.5999e-22	1.62433e-20	yes
Unigene0007249	22	0	1.1858	0.001	-10.2116	0.00106085	0.0105605	yes
Unigene0007250	160	64.5	2.7528	1.1307	-1.28368	0.000521291	0.00566495	yes
Unigene0007254	55	7	1.6959	0.22275	-2.92855	1.36629e-07	3.14498e-06	yes
Unigene0007267	52	2	0.7029	0.02795	-4.6524	4.8449e-09	1.39039e-07	yes
Unigene0007285	12904	5607.5	379.086	171.122	-1.1475	5.49928e-30	9.18696e-28	yes
Unigene0007302	761.5	230.5	3.55415	1.12075	-1.66504	1.31932e-19	1.08719e-17	yes
Unigene0007378	2995.5	7336.5	77.7822	197.681	1.34566	1.7195e-33	3.43457e-31	yes
Unigene0007379	1260	512.5	11.3795	4.812	-1.24172	1.25613e-16	8.15657e-15	yes
Unigene0007392	53	7	0.56335	0.08035	-2.80966	1.25494e-05	0.000203003	yes
Unigene0007395	63	7.5	0.89425	0.1113	-3.00622	4.5825e-06	8.09966e-05	yes
Unigene0007408	391	176	4.26905	2.0063	-1.08938	9.11106e-07	1.82649e-05	yes
Unigene0007409	126	44	1.7263	0.62345	-1.46934	9.50485e-06	0.000157829	yes
Unigene0007431	36.5	8	1.16605	0.25895	-2.17088	0.00191383	0.0175291	yes
Unigene0007435	28.5	3.5	0.3848	0.0487	-2.98212	9.98526e-05	0.00130538	yes
Unigene0007442	1314.5	351.5	13.5871	3.7727	-1.84857	2.2449e-33	4.46784e-31	yes
Unigene0007457	74.5	148.5	1.64365	3.4058	1.05109	0.000313052	0.00358917	yes
Unigene0007472	488	46.5	4.7892	0.47655	-3.32909	1.02276e-32	1.97838e-30	yes
Unigene0007493	16.5	1	0.40775	0.02435	-4.06569	0.00576653	0.0444868	yes
Unigene0007508	221	75	1.61505	0.5746	-1.49095	2.62293e-07	5.74721e-06	yes
Unigene0007522	65	14	0.7113	0.15535	-2.19494	4.20809e-05	0.000607934	yes
Unigene0007524	3223.5	1344	13.568	5.887	-1.2046	3.15473e-23	3.35747e-21	yes
Unigene0007528	160.5	52.5	2.2623	0.75505	-1.58315	1.47388e-05	0.000234905	yes
Unigene0007530	7	36	0.22705	1.201	2.40315	0.000228358	0.00272257	yes
Unigene0007533	36.5	4	2.0568	0.2383	-3.10955	0.00193331	0.0176782	yes
Unigene0007535	25421	7267	285.416	84.4057	-1.75765	1.30432e-78	1.35672e-75	yes
Unigene0007548	77	0	1.226	0.001	-10.2597	3.7918e-19	3.00925e-17	yes
Unigene0007553	62	23	0.74665	0.2859	-1.38492	0.00181819	0.0167757	yes
Unigene0007559	1095	3266	10.8191	33.3157	1.62263	5.68847e-39	1.54483e-36	yes
Unigene0007562	94650.5	25622.5	1702.55	482.008	-1.82057	3.72414e-49	1.50962e-46	yes
Unigene0007563	3298.5	1236.5	29.8573	11.6494	-1.35783	8.12974e-26	1.03746e-23	yes
Unigene0007567	23	1.5	0.7217	0.0457	-3.98113	0.000135187	0.00171012	yes
Unigene0007574	211.5	42.5	17.9874	3.78395	-2.24902	6.73237e-13	3.06481e-11	yes
Unigene0007579	2	52.5	0.07815	2.06245	4.72197	1.09042e-09	3.38668e-08	yes
Unigene0007582	281	107.5	3.7851	1.48855	-1.34642	2.79628e-07	6.11162e-06	yes
Unigene0007584	24	2	0.4563	0.03695	-3.62634	0.000278502	0.00324119	yes
Unigene0007617	7845	2976.5	19.5813	7.7338	-1.34022	2.42568e-34	5.06536e-32	yes
Unigene0007618	62.5	18	2.89025	0.83845	-1.7854	0.00050611	0.00551083	yes
Unigene0007623	165	404.5	1.2775	3.23485	1.34038	2.59865e-09	7.68566e-08	yes
Unigene0007624	746	326.5	23.4446	10.6858	-1.13356	1.21458e-10	4.28398e-09	yes
Unigene0007625	755.5	351	10.3725	5.0187	-1.04738	9.2942e-09	2.56961e-07	yes
Unigene0007627	142.5	37	5.11385	1.37845	-1.89136	1.30678e-07	3.01934e-06	yes
Unigene0007633	230	94	4.23385	1.7976	-1.2359	6.70388e-06	0.000114598	yes
Unigene0007653	54.5	106.5	2.772	5.64825	1.02688	0.00218094	0.0195787	yes
Unigene0007671	2206	862	20.2748	8.1979	-1.30636	2.02643e-21	1.91293e-19	yes
Unigene0007676	625	257.5	3.30935	1.42135	-1.21929	3.47539e-09	1.01373e-07	yes
Unigene0007685	116420	49325.5	663.367	293.008	-1.17887	1.12855e-30	1.98139e-28	yes
Unigene0007690	272.5	97.5	1.8217	0.6833	-1.41469	1.47655e-07	3.37483e-06	yes
Unigene0007699	20	53.5	0.49195	1.3477	1.45392	0.00208821	0.0188568	yes
Unigene0007701	388.5	56	3.8779	0.5915	-2.71283	4.36739e-18	3.21026e-16	yes
Unigene0007714	193.5	507.5	2.218	6.0509	1.44789	3.49905e-12	1.47589e-10	yes
Unigene0007723	48.5	11	0.5972	0.1395	-2.09795	0.000123406	0.00157811	yes
Unigene0007726	123	31.5	8.55865	2.28395	-1.90585	3.00287e-07	6.52524e-06	yes
Unigene0007729	64.5	17.5	0.51985	0.1517	-1.77687	0.00357764	0.0298564	yes
Unigene0007743	64.5	197	2.1093	6.64475	1.65545	3.36319e-07	7.24537e-06	yes
Unigene0007744	1036.5	2823.5	5.0216	14.1131	1.49082	3.19817e-29	5.14029e-27	yes
Unigene0007745	165.5	610	1.49715	5.72145	1.93416	3.69938e-16	2.30642e-14	yes
Unigene0007747	2928.5	1105	17.5545	6.8868	-1.34994	5.2577e-28	7.83383e-26	yes
Unigene0007760	3.5	39	0.14435	1.67615	3.53751	5.96464e-05	0.000829527	yes
Unigene0007764	28	5.5	0.8893	0.17545	-2.34161	0.00183888	0.0169392	yes
Unigene0007811	334	1515	5.5521	25.9639	2.2254	1.37689e-44	5.02692e-42	yes
Unigene0007818	337.5	134.5	1.34115	0.55295	-1.27825	1.62262e-08	4.35296e-07	yes
Unigene0007834	78	26.5	0.90815	0.3234	-1.48961	0.000495751	0.00540658	yes
Unigene0007839	6312.5	763	110.164	13.7683	-3.00024	7.47618e-123	2.16923e-119	yes
Unigene0007866	454.5	160	10.0002	3.70145	-1.43387	1.9054e-08	5.04529e-07	yes
Unigene0007875	24	5.5	1.63665	0.3946	-2.05228	0.00554766	0.0431547	yes
Unigene0007889	32	135	0.4631	2.03815	2.13786	1.15651e-09	3.57987e-08	yes
Unigene0007891	1	15	0.03695	0.61715	4.06197	0.00559623	0.0434283	yes
Unigene0007902	693.5	5461.5	6.61145	53.7672	3.02369	5.53807e-128	1.69616e-124	yes
Unigene0007967	17.5	0	0.7983	0.001	-9.64079	0.0050411	0.0398782	yes
Unigene0008027	17.5	0	0.7751	0.001	-9.59824	0.000531769	0.00576404	yes
Unigene0008107	3581.5	544	116.105	18.5403	-2.64669	5.04499e-12	2.07092e-10	yes
Unigene0008118	36	0	1.45235	0.001	-10.5042	1.64988e-08	4.42179e-07	yes
Unigene0008139	0	13	0.001	0.62565	9.28921	0.000456753	0.005016	yes
Unigene0008285	16	0	0.6879	0.001	-9.42606	0.00663782	0.0499981	yes
Unigene0008358	16.5	0	0.66955	0.001	-9.38705	0.00613531	0.046811	yes
Unigene0008405	23.5	0	0.64825	0.001	-9.34041	0.00210267	0.0189564	yes
Unigene0008504	17.5	0	0.8561	0.001	-9.74164	0.00503792	0.0398645	yes
Unigene0008509	0	16	0.001	0.61215	9.25774	0.000152759	0.0019079	yes
Unigene0008534	2	16	0.0424	0.35765	3.07641	0.0039921	0.0327745	yes
Unigene0008609	0	8.5	0.001	0.4227	8.72349	0.0058706	0.0451696	yes
Unigene0008612	0	15	0.001	0.7665	9.58214	0.000117915	0.00151388	yes
Unigene0008694	42.5	7	0.5385	0.0932	-2.53054	0.000492354	0.00537272	yes
Unigene0008914	13	0	0.4218	0.001	-8.72042	0.000386218	0.00433182	yes
Unigene0008924	9.5	48	0.2019	1.02405	2.34257	0.0017185	0.0159844	yes
Unigene0008955	149	40.5	5.76655	1.62575	-1.8266	1.52952e-08	4.11121e-07	yes
Unigene0008956	34	6	1.0009	0.17695	-2.49988	0.00179043	0.0165707	yes
Unigene0008987	30	0	1.3866	0.001	-10.4373	0.00102395	0.01023	yes
Unigene0009124	625	77.5	10.1689	1.3074	-2.95938	2.5936e-26	3.39625e-24	yes
Unigene0009163	31.5	7.5	0.45875	0.11475	-1.99921	0.00188213	0.0172847	yes
Unigene0009191	57.5	17.5	0.7105	0.223	-1.67179	0.00159224	0.0149895	yes
Unigene0009196	19	60	1.29715	4.2941	1.72701	0.00095935	0.00967227	yes
Unigene0009228	55	6	0.9235	0.1115	-3.05007	0.000313369	0.00359088	yes
Unigene0009263	152.5	0	4.6941	0.001	-12.1966	3.64236e-06	6.55352e-05	yes
Unigene0009272	28.5	0	1.30575	0.001	-10.3507	0.0011912	0.0116353	yes
Unigene0009309	11	0	0.4111	0.001	-8.68335	0.00162781	0.015254	yes
Unigene0009332	34	7	0.41145	0.09095	-2.17757	0.00144759	0.013776	yes
Unigene0009367	0	46.5	0.001	1.1313	10.1438	1.31576e-11	5.20724e-10	yes
Unigene0009385	753.5	350.5	21.6467	10.5892	-1.03156	8.3966e-06	0.000140826	yes
Unigene0009398	0	12.5	0.001	0.61235	9.25821	0.00099757	0.00999146	yes
Unigene0009434	2.5	17.5	0.05985	0.4289	2.84122	0.00449746	0.0362751	yes
Unigene0009442	91.5	2	1.7545	0.03685	-5.57325	2.10386e-13	1.01384e-11	yes
Unigene0009546	220	32.5	2.52265	0.38565	-2.70958	4.44736e-18	3.26469e-16	yes
Unigene0009577	39.5	192.5	1.03885	5.00775	2.26918	0.000826536	0.00849479	yes
Unigene0009689	13.5	43.5	0.5494	1.8573	1.75728	0.00113982	0.0112049	yes
Unigene0009707	108.5	51	5.2884	2.59845	-1.02518	0.00357422	0.0298456	yes
Unigene0009731	31	0	0.8093	0.001	-9.66053	0.000938708	0.00949842	yes
Unigene0009737	90	12.5	2.9765	0.43305	-2.78101	1.40863e-09	4.30945e-08	yes
Unigene0009794	11	0	0.39295	0.001	-8.6182	0.00130776	0.0126085	yes
Unigene0009802	34.5	2	1.97575	0.118	-4.06554	7.62138e-06	0.000128686	yes
Unigene0009854	21	0	0.91415	0.001	-9.83629	0.00296169	0.025382	yes
Unigene0009856	19	3	0.84095	0.1359	-2.62947	0.0051867	0.0408424	yes
Unigene0009955	15.5	1	0.40545	0.02875	-3.81789	0.00387432	0.0319646	yes
Unigene0009973	31.5	1	0.55595	0.0168	-5.04842	4.06358e-05	0.000589374	yes
Unigene0009982	127.5	58	1.10585	0.5321	-1.05539	0.00445175	0.0359591	yes
Unigene0009986	4	28.5	0.122	0.92755	2.92654	0.00160479	0.0150871	yes
Unigene0010026	14.5	46.5	0.69695	2.2498	1.69067	0.004715	0.0376879	yes
Unigene0010092	344	120.5	9.27305	3.30245	-1.48951	5.19961e-07	1.0862e-05	yes
Unigene0010095	9	0	0.67075	0.001	-9.38963	0.00641924	0.0486441	yes
Unigene0010289	13	0	0.70935	0.001	-9.47035	0.00141011	0.0134728	yes
Unigene0010361	24	3.5	0.97785	0.1496	-2.7085	0.000791049	0.00817274	yes
Unigene0010395	34	0	0.7151	0.001	-9.482	3.24265e-08	8.30688e-07	yes
Unigene0010528	97.5	41	7.2053	3.1615	-1.18845	0.000857887	0.008781	yes
Unigene0010545	17.5	1	0.6047	0.0384	-3.97704	0.000699594	0.00734347	yes
Unigene0010585	9.5	0	0.22235	0.001	-7.79669	0.00379406	0.0313964	yes
Unigene0010590	71	27	0.5751	0.2297	-1.32406	0.00182941	0.0168708	yes
Unigene0010630	5	25.5	0.15325	0.8098	2.40168	0.00230868	0.0205415	yes
Unigene0010671	0	50	0.001	1.65675	10.6941	1.56476e-13	7.65429e-12	yes
Unigene0010701	6	56.5	0.0933	0.89675	3.26476	3.53041e-05	0.000519285	yes
Unigene0010750	27.5	0	0.83085	0.001	-9.69844	0.00128745	0.0124344	yes
Unigene0010774	3286.5	11407.5	36.8408	132.244	1.84382	2.2914e-75	2.14107e-72	yes
Unigene0010837	20	2	0.58605	0.0606	-3.27363	0.000889006	0.00906083	yes
Unigene0010975	106.5	37	4.8556	1.76655	-1.45871	0.000206313	0.00248228	yes
Unigene0011067	154.5	33	5.0867	1.1546	-2.13934	0.00185947	0.0171022	yes
Unigene0011168	25	3	0.45845	0.06125	-2.90398	0.0026873	0.0233409	yes
Unigene0011241	137.5	19	3.66135	0.54225	-2.75535	4.19914e-08	1.05561e-06	yes
Unigene0011292	349.5	157.5	9.7789	4.5629	-1.09972	4.78588e-07	1.00511e-05	yes
Unigene0011336	18	0.5	0.44855	0.0119	-5.23624	0.000755728	0.00786382	yes
Unigene0011338	14.5	0.5	0.49255	0.0162	-4.9262	0.00272683	0.0236439	yes
Unigene0011355	16	0	0.8669	0.001	-9.75972	0.000775888	0.00803719	yes
Unigene0011358	12	0.5	0.3879	0.01815	-4.41764	0.00462831	0.0371565	yes
Unigene0011442	46	0	2.06685	0.001	-11.0132	0.000330986	0.00377081	yes
Unigene0011451	25	0	0.4819	0.001	-8.91259	0.000348327	0.00394772	yes
Unigene0011455	155	72.5	4.95935	2.41785	-1.03643	0.000459359	0.00504362	yes
Unigene0011530	2116.5	919	25.9622	11.6796	-1.15243	1.76068e-18	1.33698e-16	yes
Unigene0011544	36	2	1.29315	0.0684	-4.24075	0.000221077	0.00264549	yes
Unigene0011629	17	0	0.6531	0.001	-9.35116	0.00562872	0.0435762	yes
Unigene0011749	0.5	13	0.02155	0.5805	4.75154	0.00208055	0.0188	yes
Unigene0011798	0	8.5	0.001	0.7088	9.46923	0.0057376	0.0442929	yes
Unigene0011889	12	0	0.4721	0.001	-8.88295	0.000744965	0.0077709	yes
Unigene0011950	23	0	0.8303	0.001	-9.69749	0.00222925	0.0199399	yes
Unigene0011983	11.5	0	0.4841	0.001	-8.91916	0.00313472	0.0266606	yes
Unigene0012002	12	0	0.6031	0.001	-9.23625	0.000690976	0.00726407	yes
Unigene0012130	9.5	0	0.4606	0.001	-8.84737	0.00448499	0.0361957	yes
Unigene0012189	0	16	0.001	0.7256	9.50303	0.000928871	0.00941838	yes
Unigene0012288	0	90	0.001	5.21805	12.3493	6.52191e-14	3.28353e-12	yes
Unigene0012355	19	0	0.85735	0.001	-9.74374	0.00402827	0.0330279	yes
Unigene0012450	61	315.5	4.4243	23.7048	2.42166	1.69565e-19	1.38694e-17	yes
Unigene0012472	16	0	0.72075	0.001	-9.49336	8.59073e-05	0.00114093	yes
Unigene0012478	33	135	3.03455	12.9218	2.09025	4.29152e-08	1.07638e-06	yes
Unigene0012600	22	4	0.66345	0.12135	-2.45081	0.00381312	0.0315306	yes
Unigene0012723	4.5	35	0.1369	1.09385	2.99822	2.65484e-05	0.000400654	yes
Unigene0012744	20.5	1	0.5435	0.02905	-4.22567	0.00107524	0.0106786	yes
Unigene0012766	18	0	0.5625	0.001	-9.13571	0.00465329	0.0373027	yes
Unigene0012798	190.5	720	2.82715	11.1355	1.97774	6.67953e-20	5.66517e-18	yes
Unigene0012832	37	0	0.8579	0.001	-9.74467	2.44854e-10	8.26612e-09	yes
Unigene0012839	55	108.5	1.92635	3.96305	1.04074	0.00244723	0.0215318	yes
Unigene0012850	171.5	50	1.6942	0.504	-1.74911	8.50262e-06	0.000142388	yes
Unigene0012851	3	18.5	0.0902	0.5939	2.71902	0.00542764	0.0423585	yes
Unigene0012852	0	8.5	0.001	0.4207	8.71665	0.00568859	0.0439532	yes
Unigene0012875	15	0	0.4755	0.001	-8.8933	0.000120809	0.00154849	yes
Unigene0012945	713.5	37	8.5754	0.44825	-4.25783	8.43992e-14	4.21072e-12	yes
Unigene0012982	74	27	0.79565	0.3035	-1.39044	0.00061216	0.0065352	yes
Unigene0013001	35.5	0	1.0338	0.001	-10.0137	0.000661563	0.0069922	yes
Unigene0013024	842.5	380	22.7136	10.6618	-1.0911	2.08157e-11	8.05297e-10	yes
Unigene0013075	28	61	2.0519	4.6354	1.17573	0.00504404	0.0398957	yes
Unigene0013078	56.5	22.5	3.759	1.5743	-1.25564	0.00558029	0.0433351	yes
Unigene0013105	1363.5	599	14.5281	6.67855	-1.12123	9.2451e-12	3.70671e-10	yes
Unigene0013110	229.5	55	4.0495	0.99295	-2.02795	3.59429e-11	1.35256e-09	yes
Unigene0013113	10.5	0	0.60295	0.001	-9.23589	0.00169612	0.0158082	yes
Unigene0013128	36.5	7	1.45015	0.30555	-2.24672	0.00366635	0.0304814	yes
Unigene0013222	52.5	250	2.9637	14.9302	2.33276	1.35922e-09	4.16524e-08	yes
Unigene0013238	3511	1674	31.1262	15.4189	-1.01343	1.06792e-18	8.23405e-17	yes
Unigene0013250	469	156.5	7.10055	2.4237	-1.55072	1.86793e-10	6.43204e-09	yes
Unigene0013291	9.5	0	0.30485	0.001	-8.25196	0.00432624	0.0351357	yes
Unigene0013319	5.5	25.5	0.2002	0.9364	2.22568	0.00495186	0.0392736	yes
Unigene0013349	98.5	37	0.7309	0.28875	-1.33985	0.00038573	0.00432741	yes
Unigene0013396	42	94.5	0.55325	1.2913	1.22282	0.0031509	0.0267776	yes
Unigene0013422	17	55.5	0.3289	1.10965	1.75438	0.00223366	0.0199707	yes
Unigene0013444	14.5	44.5	0.3226	1.02515	1.66802	0.00209381	0.0188973	yes
Unigene0013469	767.5	196	11.382	3.0273	-1.91066	2.45851e-21	2.30895e-19	yes
Unigene0013503	125.5	53	1.81985	0.80995	-1.16791	0.000952522	0.00961927	yes
Unigene0013545	24.5	55	0.40255	0.93595	1.21726	0.00603778	0.046166	yes
Unigene0013559	17	143.5	0.25215	2.16465	3.10178	1.53637e-11	6.03266e-10	yes
Unigene0013581	33.5	7	1.0531	0.24055	-2.13023	0.0055408	0.0431195	yes
Unigene0013582	103.5	49	2.6356	1.3046	-1.01452	0.00475647	0.0379643	yes
Unigene0013588	2.5	22.5	0.07865	0.70995	3.1742	0.0059721	0.045759	yes
Unigene0013594	2349	31	60.175	0.78695	-6.25675	1.79476e-37	4.41711e-35	yes
Unigene0013600	45.5	0	1.6454	0.001	-10.6842	0.000338224	0.00384531	yes
Unigene0013620	0	10	0.001	0.6137	9.26139	0.00206949	0.0187184	yes
Unigene0013663	14.5	0	0.75445	0.001	-9.55928	0.000177535	0.00217835	yes
Unigene0013733	30.5	4	0.6193	0.08125	-2.9302	0.000170124	0.0020991	yes
Unigene0013780	15	1	0.24825	0.0185	-3.7462	0.00262952	0.0228937	yes
Unigene0013810	120.5	45	2.9504	1.1345	-1.37885	9.42396e-05	0.00123816	yes
Unigene0013830	20	0	0.85635	0.001	-9.74206	0.00332127	0.0280524	yes
Unigene0013844	616	142	7.2605	1.7682	-2.03779	1.72114e-14	9.13231e-13	yes
Unigene0013853	2268.5	1065.5	21.5234	10.5102	-1.03412	1.00428e-14	5.44933e-13	yes
Unigene0013863	1546.5	408.5	11.5374	3.1569	-1.86974	2.50218e-29	4.04524e-27	yes
Unigene0013903	10.5	0	0.5533	0.001	-9.11192	0.00258682	0.0225611	yes
Unigene0013912	42.5	9	2.50015	0.574	-2.12289	0.00135307	0.0129954	yes
Unigene0013921	25	5	0.43035	0.09115	-2.2392	0.0026086	0.0227223	yes
Unigene0013924	78.5	31	0.69645	0.2865	-1.28148	0.00139028	0.013304	yes
Unigene0013995	35	177.5	1.81055	9.63345	2.41162	6.63185e-10	2.12069e-08	yes
Unigene0014027	9	0	0.3867	0.001	-8.59507	0.00434976	0.03528	yes
Unigene0014159	9	0	0.2591	0.001	-8.01737	0.00486878	0.0387597	yes
Unigene0014168	27.5	135.5	0.40485	2.0607	2.34768	1.47493e-09	4.5073e-08	yes
Unigene0014214	3	28	0.1596	1.5563	3.28559	8.99121e-05	0.00118731	yes
Unigene0014271	33	0.5	2.3472	0.03395	-6.11139	2.40417e-06	4.48072e-05	yes
Unigene0014303	18.5	0	0.88035	0.001	-9.78193	0.00433256	0.0351767	yes
Unigene0014310	162.5	0.5	8.32155	0.02465	-8.39912	1.18722e-26	1.59634e-24	yes
Unigene0014348	20	64	0.6523	2.1665	1.73176	0.000172022	0.00212109	yes
Unigene0014397	43	149	1.3011	4.7211	1.85939	9.60136e-06	0.000159367	yes
Unigene0014407	77	7.5	1.8501	0.18015	-3.36033	3.31224e-05	0.000490071	yes
Unigene0014435	7.5	73	0.11435	1.12795	3.30217	1.44894e-08	3.9137e-07	yes
Unigene0014481	89	22.5	1.2826	0.33555	-1.93447	5.47676e-05	0.000768852	yes
Unigene0014484	27.5	6	0.52435	0.11585	-2.17827	0.00285744	0.0246138	yes
Unigene0014520	140	35	2.44165	0.62945	-1.95569	1.38288e-08	3.74627e-07	yes
Unigene0014522	0	18.5	0.001	0.7861	9.61857	3.674e-05	0.000538108	yes
Unigene0014524	46	14	1.0379	0.317	-1.71111	0.00568555	0.0439482	yes
Unigene0014574	209	53.5	5.95165	1.58075	-1.91268	4.94694e-09	1.41599e-07	yes
Unigene0014575	20.5	0	0.83185	0.001	-9.70018	0.00311965	0.0265653	yes
Unigene0014588	1	34.5	0.01605	0.5831	5.1831	9.97129e-08	2.35234e-06	yes
Unigene0014589	0	12	0.001	0.55385	9.11335	0.000555044	0.00599042	yes
Unigene0014592	6	32.5	0.21485	1.2153	2.49991	0.000237901	0.00281866	yes
Unigene0014609	1157	353.5	39.0416	12.4911	-1.64411	1.54626e-18	1.18394e-16	yes
Unigene0014610	576.5	220.5	15.0906	5.92945	-1.34768	1.68635e-10	5.82497e-09	yes
Unigene0014622	8	138	0.1251	2.18195	4.12446	1.81928e-09	5.49561e-08	yes
Unigene0014623	92	14	1.16755	0.1895	-2.62321	5.46929e-08	1.3441e-06	yes
Unigene0014627	327	64.5	7.57915	1.5362	-2.30267	7.93649e-18	5.71936e-16	yes
Unigene0014691	30	3	0.813	0.09005	-3.17446	0.000732326	0.00765499	yes
Unigene0014711	3	21.5	0.10595	0.7616	2.84565	0.00441392	0.0357215	yes
Unigene0014714	0	10.5	0.001	0.4518	8.81954	0.00390644	0.0321814	yes
Unigene0014717	107	0	1.6389	0.001	-10.6785	5.78088e-05	0.00080723	yes
Unigene0014720	17.5	1	1.0176	0.05935	-4.09978	0.0046379	0.0372227	yes
Unigene0014747	7	28	0.6633	2.7999	2.07764	0.00437703	0.0354646	yes
Unigene0014748	8	43	0.7679	4.35205	2.5027	0.000184222	0.00225138	yes
Unigene0014756	1	21	0.03505	0.7921	4.4982	7.91265e-05	0.00106265	yes
Unigene0014793	0	44	0.001	3.8357	11.9053	2.48134e-07	5.45865e-06	yes
Unigene0014894	24	4	0.6705	0.11485	-2.54549	0.00471755	0.0377028	yes
Unigene0014912	14.5	191	0.3276	4.4269	3.75629	1.26231e-22	1.2959e-20	yes
Unigene0014913	5	34.5	0.11405	0.8078	2.82433	7.95831e-05	0.001068	yes
Unigene0014942	12.5	0	0.41825	0.001	-8.70822	0.00307146	0.0262156	yes
Unigene0014950	5.5	28.5	0.11765	0.62905	2.41867	0.000655049	0.00693398	yes
Unigene0015001	5.5	25	0.2557	1.22955	2.26561	0.00320623	0.0271933	yes
Unigene0015068	368.5	85	4.203	0.98495	-2.0933	3.97683e-10	1.30655e-08	yes
Unigene0015216	16	0	0.48135	0.001	-8.91094	0.00663114	0.0499888	yes
Unigene0015239	95.5	38.5	1.76215	0.74965	-1.23305	0.00182038	0.0167904	yes
Unigene0015244	941	314	8.43075	2.94355	-1.5181	1.13563e-16	7.42657e-15	yes
Unigene0015253	175.5	76.5	3.4199	1.5276	-1.16269	0.000126808	0.00161749	yes
Unigene0015271	29.5	0	1.18325	0.001	-10.2085	0.00108771	0.010779	yes
Unigene0015272	240.5	96	5.9886	2.43985	-1.29543	1.80342e-05	0.000282365	yes
Unigene0015278	434	193.5	3.78715	1.7557	-1.10907	5.7048e-08	1.39716e-06	yes
Unigene0015303	34	204	0.5914	3.6661	2.63204	2.69242e-16	1.71002e-14	yes
Unigene0015344	1020.5	395	24.2457	9.77955	-1.30989	2.38632e-16	1.52263e-14	yes
Unigene0015371	30	5.5	0.6561	0.1238	-2.4059	0.0010957	0.0108408	yes
Unigene0015386	0	23	0.001	0.9377	9.87298	0.000354178	0.00400851	yes
Unigene0015387	426.5	126	8.593	2.60725	-1.72063	1.12488e-11	4.49701e-10	yes
Unigene0015402	17.5	0	0.63725	0.001	-9.31572	0.00503588	0.0398597	yes
Unigene0015404	173	493	3.98665	11.723	1.55609	2.90571e-08	7.503e-07	yes
Unigene0015435	371.5	1114.5	4.56925	14.1299	1.62873	2.02537e-23	2.19364e-21	yes
Unigene0015522	1106	471	12.3501	5.42525	-1.18676	2.60231e-14	1.36501e-12	yes
Unigene0015570	0	13.5	0.001	0.64485	9.33282	0.00147148	0.0139744	yes
Unigene0015581	31	2	0.84375	0.0525	-4.00643	1.65573e-05	0.000260871	yes
Unigene0015625	0	11	0.001	0.6755	9.39981	0.00122813	0.011939	yes
Unigene0015640	2697.5	1220	36.1771	17.0481	-1.08546	2.68498e-17	1.84376e-15	yes
Unigene0015641	90	32.5	1.0344	0.39435	-1.39125	0.00233243	0.020704	yes
Unigene0015659	14	369.5	0.31415	8.3877	4.73875	4.27946e-29	6.81857e-27	yes
Unigene0015665	78.5	9	0.81445	0.09965	-3.03088	4.88293e-09	1.39921e-07	yes
Unigene0015666	17	0	0.84345	0.001	-9.72016	0.00562935	0.0435762	yes
Unigene0015740	7	43	0.1371	0.8645	2.65664	2.47739e-05	0.000376243	yes
Unigene0015774	21.5	1	0.28545	0.01285	-4.4734	7.847e-05	0.00105512	yes
Unigene0015776	68	13	0.99005	0.19875	-2.31655	3.33475e-05	0.000493137	yes
Unigene0015781	25.5	5	0.32895	0.0674	-2.28705	0.00523589	0.0411474	yes
Unigene0015805	4	20.5	0.09475	0.4958	2.38756	0.00531214	0.0416695	yes
Unigene0015839	24	0	0.5919	0.001	-9.20921	0.0019809	0.0180534	yes
Unigene0015866	5	34	0.10985	0.7738	2.81643	4.85876e-05	0.000690179	yes
Unigene0015897	24	4	0.23095	0.03865	-2.57904	0.00166356	0.0155415	yes
Unigene0015912	13.5	0	0.53665	0.001	-9.06784	0.00060589	0.00647453	yes
Unigene0015929	2	33.5	0.0361	0.65595	4.18352	7.41343e-06	0.000125559	yes
Unigene0015933	22	0	1.0398	0.001	-10.0221	0.00250698	0.0219865	yes
Unigene0015989	79.5	252	2.57565	8.3571	1.69807	1.24386e-06	2.43945e-05	yes
Unigene0016024	19.5	87.5	1.78645	8.24605	2.20661	4.04067e-06	7.216e-05	yes
Unigene0016084	9	0	0.60745	0.001	-9.24662	0.00549458	0.0427961	yes
Unigene0016122	53	1	1.1863	0.0244	-5.60344	1.17747e-05	0.000191766	yes
Unigene0016123	125	309.5	5.6098	14.4328	1.36333	3.7033e-08	9.40392e-07	yes
Unigene0016158	16	0	0.50635	0.001	-8.98399	6.52549e-05	0.00089734	yes
Unigene0016172	23	81	0.35605	1.28765	1.85459	1.16801e-05	0.000190506	yes
Unigene0016173	77	22.5	2.1834	0.66405	-1.71721	4.74419e-05	0.000676695	yes
Unigene0016265	47	17.5	1.74635	0.6732	-1.37524	0.00509822	0.0402492	yes
Unigene0016309	72	26	0.572	0.2156	-1.40766	0.00318456	0.0270302	yes
Unigene0016310	78	33.5	0.87425	0.38515	-1.18263	0.00360792	0.0300591	yes
Unigene0016329	35.5	10	0.5519	0.1587	-1.7981	0.00363719	0.0302664	yes
Unigene0016367	20	107	0.8075	4.4938	2.4764	2.40419e-05	0.000366539	yes
Unigene0016386	464.5	43.5	9.1232	0.8804	-3.37331	3.30978e-10	1.09852e-08	yes
Unigene0016389	111	1	3.6796	0.0318	-6.85438	1.05327e-15	6.31149e-14	yes
Unigene0016404	34.5	2	0.85095	0.04845	-4.13451	7.28896e-05	0.000989249	yes
Unigene0016406	1301.5	318.5	16.4387	4.1689	-1.97936	3.66119e-36	8.51636e-34	yes
Unigene0016439	15.5	1.5	0.4727	0.047	-3.33019	0.00528006	0.0414473	yes
Unigene0016548	91.5	26	1.1106	0.33355	-1.73536	0.00013389	0.00169566	yes
Unigene0016721	0	8.5	0.001	0.4266	8.73674	0.00573818	0.0442929	yes
Unigene0016724	16	0	0.4402	0.001	-8.78202	0.000128814	0.00164118	yes
Unigene0016734	12	0	0.36965	0.001	-8.53002	0.00164036	0.0153456	yes
Unigene0016774	5	45.5	0.1204	1.16025	3.26853	5.96947e-06	0.00010326	yes
Unigene0016865	94	223.5	8.51715	20.5174	1.2684	0.00034798	0.00394552	yes
Unigene0016905	8.5	0	0.53135	0.001	-9.05352	0.00641566	0.0486304	yes
Unigene0016990	0	8.5	0.001	0.434	8.76155	0.00587464	0.0451881	yes
Unigene0017014	11.5	0	0.28745	0.001	-8.16717	0.00592827	0.0455307	yes
Unigene0017111	9.5	0	0.37105	0.001	-8.53547	0.00379334	0.0313951	yes
Unigene0017175	0	10.5	0.001	0.506	8.98299	0.00242256	0.0213719	yes
Unigene0017176	282.5	73	8.2359	2.2157	-1.89416	1.92996e-12	8.40417e-11	yes
Unigene0017183	14.5	0.5	0.5124	0.0172	-4.89679	0.00102031	0.0101956	yes
Unigene0017254	13.5	0	0.4031	0.001	-8.65499	0.000751417	0.00783227	yes
Unigene0017267	2069.5	858	22.8043	9.8436	-1.21205	2.28133e-19	1.83602e-17	yes
Unigene0017309	111	0	2.8342	0.001	-11.4687	1.03214e-10	3.69246e-09	yes
Unigene0017420	48.5	6	1.20915	0.1581	-2.93508	2.0521e-05	0.000317158	yes
Unigene0017479	34.5	8	0.57345	0.1428	-2.00567	0.00341279	0.0286892	yes
Unigene0017487	10	0	0.39375	0.001	-8.62114	0.00410573	0.0335624	yes
Unigene0017511	61.5	223	1.89075	7.0397	1.89656	1.65439e-10	5.72535e-09	yes
Unigene0017581	21.5	2	0.34245	0.0356	-3.26594	0.00107883	0.0107065	yes
Unigene0017598	0	18.5	0.001	0.76445	9.57828	0.000149558	0.00187357	yes
Unigene0017674	970	143.5	13.4072	2.0527	-2.70742	1.14828e-49	4.75965e-47	yes
Unigene0017675	0.5	20.5	0.0215	0.88355	5.3609	0.00225043	0.0201011	yes
Unigene0017708	9.5	0	0.31955	0.001	-8.3199	0.00432707	0.0351373	yes
Unigene0017733	0.5	16	0.03125	0.9971	4.99581	0.000364953	0.00411442	yes
Unigene0017780	4515.5	1376.5	97.8526	31.0078	-1.65798	1.40424e-47	5.37598e-45	yes
Unigene0017943	0	24.5	0.001	0.75655	9.56329	2.93192e-07	6.37861e-06	yes
Unigene0017959	627.5	172.5	11.8776	3.39405	-1.80717	1.19403e-20	1.08266e-18	yes
Unigene0018042	0.5	14	0.01665	0.523	4.97322	0.00457926	0.0368164	yes
Unigene0018053	1.5	17.5	0.036	0.4135	3.52182	0.00493491	0.0391843	yes
Unigene0018056	84	31	2.5368	0.9751	-1.37939	0.00216826	0.0194839	yes
Unigene0018094	0	16.5	0.001	0.66375	9.3745	0.000201888	0.00243436	yes
Unigene0018095	0.5	18.5	0.0202	0.77035	5.25309	0.000266495	0.00311725	yes
Unigene0018141	201	96	7.98445	3.93365	-1.02132	0.000136939	0.0017307	yes
Unigene0018174	54	9	0.77935	0.13125	-2.56995	1.61818e-05	0.000255538	yes
Unigene0018178	47	104	1.19065	2.7399	1.20237	0.000563341	0.0060669	yes
Unigene0018225	43	14	0.62	0.2126	-1.54413	0.00396181	0.0325597	yes
Unigene0018231	74.5	0	1.8933	0.001	-10.8867	2.81267e-08	7.27979e-07	yes
Unigene0018235	15.5	1.5	0.56155	0.0555	-3.33885	0.00328035	0.0277494	yes
Unigene0018239	264.5	46.5	3.17445	0.5683	-2.48178	2.51532e-11	9.62296e-10	yes
Unigene0018268	10.5	0	0.35825	0.001	-8.48482	0.00175906	0.0163175	yes
Unigene0018269	1243	184.5	17.1368	2.63435	-2.70158	3.20908e-58	1.75162e-55	yes
Unigene0018284	10	0	0.80675	0.001	-9.65598	0.00244732	0.0215318	yes
Unigene0018296	0.5	13	0.01655	0.4522	4.77206	0.00181728	0.0167702	yes
Unigene0018299	1066.5	498	8.5669	4.15715	-1.04318	2.47918e-12	1.0595e-10	yes
Unigene0018354	156.5	4	1.4629	0.03875	-5.23849	2.98597e-23	3.19638e-21	yes
Unigene0018365	109	27.5	1.11215	0.2919	-1.92981	1.47022e-07	3.36174e-06	yes
Unigene0018371	467.5	151	7.29575	2.4667	-1.56447	5.89774e-12	2.4102e-10	yes
Unigene0018373	213	420	5.0635	10.3349	1.02932	2.06586e-05	0.000319017	yes
Unigene0018383	747	1494	13.182	27.4732	1.05945	3.39547e-12	1.4344e-10	yes
Unigene0018423	13337	3655.5	151.433	43.1321	-1.81184	6.31728e-68	4.40842e-65	yes
Unigene0018447	9	0	0.8126	0.001	-9.6664	0.00549387	0.0427961	yes
Unigene0018483	173.5	80.5	3.67965	1.7538	-1.06908	0.000263166	0.00308289	yes
Unigene0018493	290.5	116.5	2.0402	0.8605	-1.24546	6.50223e-06	0.000111393	yes
Unigene0018497	0	12.5	0.001	0.5802	9.18041	0.000412546	0.00459367	yes
Unigene0018528	0	26.5	0.001	0.70695	9.46546	0.00110907	0.0109573	yes
Unigene0018529	378.5	1243.5	8.5736	29.4108	1.77837	2.67386e-22	2.67042e-20	yes
Unigene0018539	147	66	1.67755	0.76315	-1.13632	0.00231345	0.020574	yes
Unigene0018542	5.5	26.5	0.07755	0.38865	2.32527	0.00474863	0.0379127	yes
Unigene0018553	0	13.5	0.001	0.52745	9.04289	0.000306154	0.00352177	yes
Unigene0018563	284	98.5	3.51855	1.27675	-1.4625	4.1335e-08	1.04005e-06	yes
Unigene0018564	224	90	2.7261	1.13945	-1.2585	2.43209e-06	4.52663e-05	yes
Unigene0018582	5.5	41	0.0886	0.69595	2.97361	6.82758e-06	0.000116568	yes
Unigene0018584	43	7.5	1.67315	0.2887	-2.53492	0.00496873	0.0393961	yes
Unigene0018629	142	938	2.2448	15.2304	2.7623	1.84362e-40	5.26616e-38	yes
Unigene0018636	314.5	124.5	8.82425	3.6536	-1.27215	5.61639e-07	1.16796e-05	yes
Unigene0018639	140.5	23	3.79325	0.6463	-2.55316	3.56915e-07	7.65617e-06	yes
Unigene0018677	21	81	0.4783	1.87825	1.9734	2.72084e-05	0.000409604	yes
Unigene0018678	20	0	0.7886	0.001	-9.62315	0.00332178	0.0280524	yes
Unigene0018695	20	0	0.81	0.001	-9.66178	0.00332231	0.0280526	yes
Unigene0018697	186.5	40.5	2.18545	0.4882	-2.16239	8.05327e-09	2.2434e-07	yes
Unigene0018704	47.5	3	0.84245	0.0554	-3.92663	0.00150799	0.0142768	yes
Unigene0018733	127.5	17	2.1946	0.3066	-2.83953	8.28538e-13	3.73784e-11	yes
Unigene0018742	33.5	8.5	1.0547	0.279	-1.9185	0.0018105	0.0167328	yes
Unigene0018746	1672.5	664.5	36.6915	15.1312	-1.27792	7.26616e-21	6.64305e-19	yes
Unigene0018753	90.5	21.5	1.4831	0.3522	-2.07415	0.000239233	0.00283262	yes
Unigene0018765	327.5	32	9.16125	0.93135	-3.29815	1.85258e-29	3.01271e-27	yes
Unigene0018785	0	23	0.001	0.76955	9.58787	9.99911e-06	0.000165488	yes
Unigene0018786	0	130.5	0.001	1.024	10	3.91183e-26	5.07424e-24	yes
Unigene0018787	0	22	0.001	0.5695	9.15355	1.90899e-05	0.000297375	yes
Unigene0018788	0	26	0.001	0.56865	9.1514	1.13054e-07	2.64428e-06	yes
Unigene0018797	12	42.5	0.2456	0.9041	1.88017	0.000455977	0.00501047	yes
Unigene0018807	57	21.5	1.17995	0.46515	-1.34296	0.00516899	0.0407146	yes
Unigene0018812	9	0	0.36885	0.001	-8.52689	0.00435239	0.0352961	yes
Unigene0018815	508	231	5.3818	2.56035	-1.07175	3.38505e-06	6.11851e-05	yes
Unigene0018836	275	712.5	2.40865	6.47825	1.42738	3.9905e-16	2.47182e-14	yes
Unigene0018877	45	6	0.91885	0.1306	-2.81467	9.64327e-06	0.000159887	yes
Unigene0018878	28	5	0.81685	0.1541	-2.4062	0.000768576	0.00797043	yes
Unigene0018936	72.5	0	1.8022	0.001	-10.8155	3.71523e-05	0.000543137	yes
Unigene0018937	41.5	0	1.6091	0.001	-10.652	0.000419556	0.0046548	yes
Unigene0018938	20.5	0	1.67665	0.001	-10.7114	0.00311851	0.0265638	yes
Unigene0018946	30.5	9	0.54345	0.16715	-1.701	0.00552374	0.0430111	yes
Unigene0018965	53	0	0.96325	0.001	-9.91177	2.88001e-07	6.28303e-06	yes
Unigene0019003	16	50.5	0.2166	0.71295	1.71877	0.000425714	0.00471363	yes
Unigene0019009	0	18	0.001	0.855	9.73978	1.47132e-05	0.000234632	yes
Unigene0019057	0	10	0.001	0.63985	9.32159	0.00238979	0.0211234	yes
Unigene0019061	16	1	0.3792	0.0263	-3.84982	0.00134094	0.0128856	yes
Unigene0019099	39	5	0.45325	0.05825	-2.95998	3.69424e-05	0.000540785	yes
Unigene0019104	98.5	38	3.58575	1.43645	-1.31977	0.000221285	0.00264683	yes
Unigene0019121	22.5	0	0.3253	0.001	-8.34563	1.28947e-06	2.5226e-05	yes
Unigene0019131	931.5	272	35.6975	10.8239	-1.72161	1.29502e-25	1.62999e-23	yes
Unigene0019136	28.5	4	1.1778	0.17165	-2.77855	0.000210047	0.002525	yes
Unigene0019146	4	37.5	0.12295	1.15615	3.23318	3.54638e-05	0.000521217	yes
Unigene0019154	21	71.5	0.19575	0.6852	1.80751	5.57188e-05	0.000781013	yes
Unigene0019156	133.5	24.5	1.526	0.303	-2.33237	1.20658e-05	0.000196044	yes
Unigene0019172	0	13	0.001	0.5228	9.03012	0.000456366	0.00501375	yes
Unigene0019173	0	25	0.001	0.7227	9.49725	8.37848e-05	0.0011184	yes
Unigene0019189	4558	1858	53.9129	22.8001	-1.24159	4.94044e-28	7.38107e-26	yes
Unigene0019205	30.5	0	0.75845	0.001	-9.56691	0.000974285	0.00979912	yes
Unigene0019233	18	0	0.8247	0.001	-9.68773	0.00464989	0.0372864	yes
Unigene0019239	617.5	127.5	5.63295	1.1826	-2.25193	1.79163e-07	4.03805e-06	yes
Unigene0019276	20	2	0.79515	0.0798	-3.31677	0.000824543	0.00847589	yes
Unigene0019286	142	454	9.18595	30.4285	1.72792	4.27767e-11	1.59664e-09	yes
Unigene0019296	77.5	31	2.4052	0.98375	-1.28979	0.0019968	0.0181743	yes
Unigene0019314	589.5	223.5	9.78665	3.89355	-1.32973	1.71971e-09	5.20912e-08	yes
Unigene0019317	21.5	0	1.75845	0.001	-10.7801	0.00275381	0.0238402	yes
Unigene0019332	9	38	0.1086	0.47175	2.119	0.000777716	0.00805461	yes
Unigene0019374	9	0	0.45635	0.001	-8.834	0.00549293	0.0427953	yes
Unigene0019381	47.5	10.5	0.8179	0.19695	-2.0541	0.00299987	0.025674	yes
Unigene0019451	33.5	0	1.7668	0.001	-10.7869	0.000752509	0.00783773	yes
Unigene0019462	38.5	10	1.0384	0.2725	-1.93003	0.00147397	0.0139932	yes
Unigene0019466	0	9.5	0.001	0.4198	8.71356	0.00349451	0.0292567	yes
Unigene0019506	196.5	93.5	2.8444	1.38795	-1.03517	0.00274273	0.0237518	yes
Unigene0019507	1021.5	470.5	47.7478	23.1318	-1.04556	3.11229e-05	0.000462224	yes
Unigene0019553	468.5	220	6.9426	3.39005	-1.03417	3.68059e-07	7.87073e-06	yes
Unigene0019559	435.5	197	7.79305	3.67285	-1.08529	1.99109e-07	4.45483e-06	yes
Unigene0019564	527	252.5	12.2688	6.01005	-1.02955	9.3987e-06	0.000156161	yes
Unigene0019580	47	9	0.4654	0.09395	-2.30851	7.45945e-05	0.00100965	yes
Unigene0019601	506	115	5.25515	1.2472	-2.07504	5.53855e-20	4.72654e-18	yes
Unigene0019612	42.5	3.5	0.36975	0.03255	-3.50582	8.21181e-05	0.00109827	yes
Unigene0019644	85	0	1.7977	0.001	-10.8119	8.51797e-05	0.0011331	yes
Unigene0019652	105	37.5	6.0068	2.1904	-1.4554	0.000195403	0.00236703	yes
Unigene0019667	583.5	244	7.40875	3.20925	-1.20699	1.1226e-10	3.97991e-09	yes
Unigene0019678	56	0	0.72425	0.001	-9.50034	0.000202854	0.00244493	yes
Unigene0019687	3150	1396.5	30.0124	13.8398	-1.11674	1.78082e-20	1.60155e-18	yes
Unigene0019706	4127.5	49	63.1104	0.7595	-6.37668	2.39109e-18	1.78374e-16	yes
Unigene0019720	391.5	111	3.43635	1.0211	-1.75075	1.06097e-10	3.78577e-09	yes
Unigene0019725	198.5	84	4.22875	1.87765	-1.1713	6.61268e-05	0.000908198	yes
Unigene0019727	54	18	1.7044	0.5842	-1.54473	0.00342953	0.0288035	yes
Unigene0019740	31	0	1.3139	0.001	-10.3596	0.00093921	0.0095005	yes
Unigene0019747	314	126.5	2.98935	1.25575	-1.25128	1.10153e-06	2.18205e-05	yes
Unigene0019751	404	173.5	2.69885	1.22735	-1.1368	0.000173034	0.00213118	yes
Unigene0019763	56.5	6	1.2323	0.1322	-3.22056	4.02063e-07	8.54484e-06	yes
Unigene0019780	513.5	231	5.3276	2.52155	-1.07917	6.68789e-06	0.000114395	yes
Unigene0019788	0	12.5	0.001	0.5469	9.09513	0.000997714	0.00999146	yes
Unigene0019795	27	84.5	1.836	5.99205	1.70648	1.86645e-05	0.000291299	yes
Unigene0019798	2	26	0.04255	0.5614	3.7218	7.84653e-05	0.00105512	yes
Unigene0019825	304.5	142.5	4.1791	2.04645	-1.03007	4.59815e-05	0.000657907	yes
Unigene0019829	220.5	67	3.59325	1.1236	-1.67716	4.48515e-07	9.47e-06	yes
Unigene0019832	546.5	209.5	7.12365	2.8454	-1.32399	3.0762e-11	1.16555e-09	yes
Unigene0019849	363	1397	10.3081	41.1668	1.9977	2.78571e-25	3.42034e-23	yes
Unigene0019862	4.5	28	0.1682	1.0548	2.64872	0.00157505	0.0148429	yes
Unigene0019871	20	99	0.22015	1.10995	2.33394	1.08196e-07	2.53711e-06	yes
Unigene0019874	726	1572.5	9.5882	21.4193	1.15958	1.93914e-15	1.13485e-13	yes
Unigene0019881	4667.5	1875.5	29.1044	12.2345	-1.25028	3.39761e-20	2.9826e-18	yes
Unigene0019905	2570	891.5	34.1478	12.4123	-1.46003	9.1553e-20	7.68223e-18	yes
Unigene0019906	30	7.5	0.41355	0.10865	-1.92837	0.00554378	0.0431366	yes
Unigene0020006	18	0.5	0.55025	0.01445	-5.25095	0.00425979	0.0347104	yes
Unigene0020025	1694.5	437	17.0073	4.5831	-1.89176	1.35527e-32	2.60329e-30	yes
Unigene0020038	52.5	13	1.7191	0.4424	-1.95823	0.000138294	0.00174677	yes
Unigene0020047	88.5	38.5	0.80145	0.35505	-1.17459	0.00311688	0.026558	yes
Unigene0020051	340	154	4.8431	2.3005	-1.07398	1.4254e-05	0.000228101	yes
Unigene0020053	3.5	67	0.05365	1.0323	4.26614	3.10206e-09	9.10616e-08	yes
Unigene0020100	26	1.5	0.2829	0.01675	-4.07806	5.11009e-05	0.000720698	yes
Unigene0020121	29	71.5	0.73025	1.85175	1.34243	0.00469555	0.0375651	yes
Unigene0020135	1337.5	519	8.29505	3.3615	-1.30315	3.94424e-16	2.44592e-14	yes
Unigene0020138	45	3.5	0.9271	0.0697	-3.73349	0.00353623	0.029578	yes
Unigene0020140	1399.5	601.5	10.0436	4.486	-1.16278	6.09786e-16	3.71457e-14	yes
Unigene0020150	20.5	3.5	0.7249	0.12715	-2.51125	0.00369074	0.0306446	yes
Unigene0020184	0	9.5	0.001	0.58315	9.18772	0.0038251	0.03162	yes
Unigene0020187	35	0	1.01925	0.001	-9.99329	0.000689241	0.0072486	yes
Unigene0020191	44.5	8	0.5273	0.09745	-2.43589	0.000663291	0.00700644	yes
Unigene0020240	146.5	804	7.06635	40.3995	2.5153	1.0272e-30	1.80921e-28	yes
Unigene0020247	88	357.5	1.31245	5.5382	2.07715	1.79818e-08	4.77743e-07	yes
Unigene0020261	13.5	48	0.3164	1.14525	1.85584	0.000748945	0.00780945	yes
Unigene0020274	189.5	3	3.1933	0.0508	-5.97408	8.93639e-18	6.42313e-16	yes
Unigene0020294	26	0	1.24005	0.001	-10.2762	0.00154894	0.0146293	yes
Unigene0020321	80.5	26	2.0747	0.7039	-1.55946	0.00015939	0.00197813	yes
Unigene0020338	537	174	3.1295	1.04225	-1.58623	1.63833e-11	6.40109e-10	yes
Unigene0020343	265	127	4.43945	2.19525	-1.016	2.97664e-05	0.000444111	yes
Unigene0020363	175.5	1	5.7958	0.0315	-7.52351	3.78477e-14	1.95732e-12	yes
Unigene0020370	100	13	2.33105	0.3152	-2.88664	5.68057e-09	1.61342e-07	yes
Unigene0020373	1480.5	666.5	22.0312	10.3358	-1.09191	7.86509e-14	3.92749e-12	yes
Unigene0020427	46	2.5	3.7396	0.2046	-4.19201	8.77037e-05	0.00116115	yes
Unigene0020428	41.5	2	0.8984	0.0474	-4.2444	8.07946e-05	0.00108294	yes
Unigene0020445	660.5	37	15.8616	0.93645	-4.0822	9.60878e-15	5.22925e-13	yes
Unigene0020464	3	22	0.1193	0.9526	2.99728	0.00446074	0.0360211	yes
Unigene0020487	481	31	8.46865	0.5557	-3.92975	3.24627e-36	7.5832e-34	yes
Unigene0020529	449.5	174	2.3201	0.9442	-1.29702	2.55302e-07	5.60516e-06	yes
Unigene0020543	0	175	0.001	8.3444	13.0266	1.01906e-36	2.45326e-34	yes
Unigene0020563	18	74.5	0.24075	1.04705	2.12072	0.000106343	0.001383	yes
Unigene0020564	2	32.5	0.0554	0.8987	4.01988	7.02218e-06	0.00011952	yes
Unigene0020583	96	498	0.88765	4.75735	2.4221	5.02458e-25	6.06127e-23	yes
Unigene0020590	6.5	67.5	0.09015	0.9273	3.36264	2.17651e-05	0.000334884	yes
Unigene0020591	1249.5	584	28.4437	13.9171	-1.03125	1.73369e-09	5.24569e-08	yes
Unigene0020592	1	14.5	0.05195	0.76995	3.88957	0.00221443	0.0198213	yes
Unigene0020597	69	12	1.0314	0.1841	-2.48604	3.23156e-07	6.98638e-06	yes
Unigene0020616	25.5	0	0.52345	0.001	-9.03191	0.00163525	0.0153067	yes
Unigene0020630	100.5	29	1.4154	0.4325	-1.71044	7.90617e-05	0.00106203	yes
Unigene0020641	154	376	3.2226	8.1275	1.33459	1.50285e-09	4.58751e-08	yes
Unigene0020646	1489	570.5	15.334	6.10915	-1.3277	5.87397e-19	4.57381e-17	yes
Unigene0020648	361.5	148	4.39365	1.8235	-1.26871	6.22104e-05	0.000860195	yes
Unigene0020663	11	0	0.6909	0.001	-9.43233	0.00190991	0.017499	yes
Unigene0020665	180.5	6.5	3.58045	0.12775	-4.80875	1.85025e-24	2.13394e-22	yes
Unigene0020673	70	19.5	0.7527	0.21575	-1.80271	6.17757e-05	0.000855257	yes
Unigene0020686	11.5	0	0.35585	0.001	-8.47513	0.00258729	0.0225616	yes
Unigene0020705	19	0	0.63345	0.001	-9.30709	0.0040287	0.0330279	yes
Unigene0020725	212.5	69	2.40355	0.79645	-1.59351	3.86296e-06	6.92331e-05	yes
Unigene0020726	149.5	27	2.52465	0.4615	-2.45168	9.84135e-10	3.0739e-08	yes
Unigene0020732	3953.5	1610.5	21.5273	9.06005	-1.24858	4.63716e-26	6.00099e-24	yes
Unigene0020735	101	40	1.33285	0.54625	-1.28688	0.000232957	0.00276962	yes
Unigene0020754	13.5	55	0.3228	1.3306	2.04336	0.00019553	0.00236805	yes
Unigene0020755	7	73	0.2894	3.1253	3.43286	1.53146e-08	4.11441e-07	yes
Unigene0020762	23.5	3.5	0.63775	0.1021	-2.64301	0.00132423	0.0127428	yes
Unigene0020767	12.5	178.5	0.40665	5.85765	3.84846	1.09523e-09	3.39779e-08	yes
Unigene0020769	13.5	0	0.45755	0.001	-8.83779	0.000502964	0.00547983	yes
Unigene0020780	30	3	1.3089	0.146	-3.16431	0.000488766	0.00534097	yes
Unigene0020790	75	19.5	0.7356	0.1957	-1.91028	9.36628e-05	0.00123117	yes
Unigene0020811	562	2967.5	7.6695	41.4138	2.43291	6.8203e-41	1.95831e-38	yes
Unigene0020812	341.5	147.5	5.02755	2.2318	-1.17165	7.59102e-06	0.000128252	yes
Unigene0020821	115	38	1.96365	0.67415	-1.5424	1.49741e-05	0.000238379	yes
Unigene0020826	56	135.5	0.69635	1.75575	1.3342	8.45236e-05	0.00112717	yes
Unigene0020835	15	1	0.39485	0.02965	-3.7352	0.00458849	0.0368798	yes
Unigene0020870	27.5	0	0.82255	0.001	-9.68396	0.00128666	0.0124333	yes
Unigene0020879	161.5	70.5	4.753	2.1646	-1.13474	0.000108025	0.00140223	yes
Unigene0020885	19.5	0	0.8117	0.001	-9.6648	0.0036702	0.030495	yes
Unigene0020892	175	77	1.88315	0.86095	-1.12915	5.5224e-05	0.000775063	yes
Unigene0020917	58	11.5	0.82255	0.17085	-2.26737	1.39497e-05	0.000223621	yes
Unigene0020922	33.5	4	0.8262	0.1091	-2.92084	0.00167161	0.015603	yes
Unigene0020957	249	111.5	2.2392	1.02665	-1.12504	6.28365e-05	0.000867764	yes
Unigene0020959	80.5	28	1.45445	0.52815	-1.46145	0.000411345	0.00458455	yes
Unigene0020983	682.5	78.5	8.16505	1.01015	-3.01489	8.07284e-13	3.64793e-11	yes
Unigene0020986	27.5	0.5	1.0654	0.0213	-5.6444	1.2538e-05	0.000202878	yes
Unigene0021007	1226.5	295.5	11.6171	2.91855	-1.99292	1.32603e-27	1.89385e-25	yes
Unigene0021025	0.5	19.5	0.0225	0.8417	5.22531	0.00108472	0.0107553	yes
Unigene0021026	0	17	0.001	0.6344	9.30925	0.000488978	0.00534116	yes
Unigene0021065	436.5	29.5	6.60965	0.4809	-3.78077	1.90587e-19	1.55166e-17	yes
Unigene0021069	23.5	0	2.1676	0.001	-11.0819	0.00210085	0.0189443	yes
Unigene0021070	160.5	0.5	2.39865	0.0081	-8.21009	0.000104893	0.0013664	yes
Unigene0021072	117.5	49	2.24315	0.97215	-1.20628	0.00458617	0.0368666	yes
Unigene0021096	47.5	139	0.8646	2.6226	1.60089	4.66265e-07	9.81096e-06	yes
Unigene0021102	808	358.5	4.3914	2.0405	-1.10576	5.95929e-09	1.6839e-07	yes
Unigene0021117	592.5	128.5	9.9376	2.2489	-2.14368	6.38422e-24	7.15357e-22	yes
Unigene0021141	292	98	3.6213	1.2638	-1.51874	5.53693e-10	1.78924e-08	yes
Unigene0021156	96.5	9.5	1.2129	0.1197	-3.34097	2.74974e-10	9.22645e-09	yes
Unigene0021168	48	14	1.15265	0.3434	-1.74699	0.00077791	0.00805511	yes
Unigene0021199	32.5	1.5	2.0919	0.09265	-4.49688	8.70721e-06	0.000145416	yes
Unigene0021203	27.5	0	0.57405	0.001	-9.16503	0.00128722	0.0124344	yes
Unigene0021204	27.5	311	0.50635	5.9289	3.54956	2.21109e-32	4.20329e-30	yes
Unigene0021206	128	18.5	3.2495	0.4758	-2.77179	2.59475e-09	7.67825e-08	yes
Unigene0021207	799	178.5	5.44835	1.2615	-2.11068	3.27701e-30	5.55871e-28	yes
Unigene0021216	21.5	74.5	0.52585	1.8943	1.84894	0.000420386	0.00466025	yes
Unigene0021249	276.5	550	6.67655	13.6969	1.03668	5.97262e-07	1.23644e-05	yes
Unigene0021258	16	2	0.5952	0.0767	-2.95608	0.00647047	0.048965	yes
Unigene0021265	15	1.5	0.82705	0.08325	-3.31245	0.00584515	0.0450052	yes
Unigene0021288	12	85.5	0.22435	1.6939	2.91653	2.62277e-05	0.000396139	yes
Unigene0021290	0	14.5	0.001	0.35605	8.47594	0.000145337	0.00182803	yes
Unigene0021303	410.5	169	5.8009	2.52055	-1.20254	0.000130707	0.00166222	yes
Unigene0021307	21	3	0.5812	0.0879	-2.7251	0.00270034	0.02344	yes
Unigene0021311	72.5	22.5	0.647	0.2078	-1.63857	0.000103456	0.00134929	yes
Unigene0021315	20.5	0	1.17275	0.001	-10.1957	0.00311914	0.026565	yes
Unigene0021318	10	59	0.57765	3.65285	2.66075	0.000175384	0.00215676	yes
Unigene0021321	789	375	19.9214	9.7886	-1.02514	1.05135e-09	3.27272e-08	yes
Unigene0021332	11	68	0.2757	1.7767	2.68803	5.20387e-06	9.11612e-05	yes
Unigene0021341	916.5	2546.5	13.6227	39.1547	1.52317	3.68561e-32	6.91102e-30	yes
Unigene0021358	22.5	3	0.47385	0.06775	-2.80614	0.00130241	0.0125613	yes
Unigene0021359	5085.5	18915	62.7054	241.723	1.94669	2.47662e-95	4.26668e-92	yes
Unigene0021366	362	160.5	4.46475	2.0369	-1.1322	1.72968e-06	3.29494e-05	yes
Unigene0021406	158	65.5	1.19435	0.5169	-1.20827	0.00027995	0.0032553	yes
Unigene0021407	87.5	11	1.81625	0.23985	-2.92076	1.32309e-06	2.58014e-05	yes
Unigene0021428	4970.5	1743	43.6282	15.8831	-1.45777	9.10282e-33	1.76701e-30	yes
Unigene0021445	325.5	62.5	4.47205	0.9001	-2.31278	1.644e-16	1.06002e-14	yes
Unigene0021507	12	44	0.3359	1.2785	1.92835	0.0016412	0.0153497	yes
Unigene0021567	40	10	1.3437	0.3506	-1.93831	0.000873157	0.00891981	yes
Unigene0021580	169	573	3.42375	11.8867	1.7957	2.26623e-13	1.08263e-11	yes
Unigene0021583	1809.5	621.5	18.373	6.58515	-1.4803	1.59665e-23	1.73613e-21	yes
Unigene0021588	2335.5	743.5	71.9596	23.6843	-1.60325	2.90534e-19	2.31792e-17	yes
Unigene0021608	4	43.5	0.06665	0.78525	3.55848	7.0634e-05	0.000962666	yes
Unigene0021619	118.5	38.5	2.7695	0.948	-1.54667	3.60519e-05	0.000529155	yes
Unigene0021628	57	15	1.1114	0.30465	-1.86715	0.000240548	0.00284514	yes
Unigene0021641	10.5	38	0.39205	1.46515	1.90194	0.000985887	0.00989048	yes
Unigene0021646	2512.5	672	28.4596	7.93935	-1.84182	1.95371e-39	5.35851e-37	yes
Unigene0021647	36	2	0.5478	0.0331	-4.04875	0.00400357	0.0328589	yes
Unigene0021658	476	227.5	18.1165	9.0385	-1.00315	1.39541e-06	2.70585e-05	yes
Unigene0021664	328	58.5	6.47355	1.1947	-2.43791	3.7937e-19	3.00925e-17	yes
Unigene0021671	81.5	586	1.1086	8.15675	2.87926	4.45236e-28	6.66994e-26	yes
Unigene0021674	1203.5	237	23.2427	4.81285	-2.27181	4.43544e-27	6.11304e-25	yes
Unigene0021692	24	154	1.50335	9.8777	2.71599	6.91166e-11	2.52173e-09	yes
Unigene0021699	1406.5	11290	11.9496	99.1232	3.05226	8.54581e-149	6.73032e-145	yes
Unigene0021700	54.5	12	0.6635	0.15	-2.14513	2.66733e-05	0.000402428	yes
Unigene0021719	19	0	0.68265	0.001	-9.415	1.55393e-05	0.000246536	yes
Unigene0021751	3	38	0.07115	0.93355	3.71379	6.19397e-07	1.27795e-05	yes
Unigene0021761	61.5	3	1.66945	0.08525	-4.29153	4.44718e-06	7.88323e-05	yes
Unigene0021767	0.5	12	0.02055	0.4941	4.58759	0.00294278	0.0252502	yes
Unigene0021775	168.5	43	5.04745	1.34765	-1.90511	7.01437e-09	1.96791e-07	yes
Unigene0021781	1722.5	495	20.4697	6.0778	-1.75187	3.03904e-35	6.64838e-33	yes
Unigene0021798	156.5	38	3.6507	0.88955	-2.03703	0.000229612	0.00273456	yes
Unigene0021807	4266	1841.5	29.5703	13.3372	-1.14869	2.06981e-18	1.55247e-16	yes
Unigene0021841	54	3	4.72115	0.27355	-4.10926	4.06324e-10	1.33414e-08	yes
Unigene0021842	1055	170.5	18.9374	3.1923	-2.56857	8.57034e-46	3.19239e-43	yes
Unigene0021845	48	6	1.67805	0.22035	-2.92892	0.000315422	0.0036114	yes
Unigene0021857	111.5	34	1.82975	0.57425	-1.6719	0.00132749	0.0127719	yes
Unigene0021858	1460	3507	19.2269	47.5855	1.3074	1.06486e-21	1.03354e-19	yes
Unigene0021878	987.5	448.5	21.3358	10.0784	-1.08201	2.23808e-10	7.6249e-09	yes
Unigene0021903	139.5	32	3.5751	0.88195	-2.01921	2.96919e-05	0.00044325	yes
Unigene0021916	30	2	1.13425	0.07175	-3.98262	0.00244121	0.0214952	yes
Unigene0021924	71	226.5	2.1921	7.1591	1.70746	2.27161e-08	5.95773e-07	yes
Unigene0021950	277	31	3.00395	0.3436	-3.12806	2.90908e-10	9.71968e-09	yes
Unigene0021953	28.5	7	0.68	0.17425	-1.96438	0.00637809	0.0483988	yes
Unigene0021968	206	61.5	3.92805	1.21455	-1.69339	6.4291e-08	1.56205e-06	yes
Unigene0021978	8	39.5	0.1128	0.5649	2.32423	0.000440789	0.00485714	yes
Unigene0021980	20.5	56.5	0.35765	1.0438	1.54522	0.00346138	0.0290401	yes
Unigene0021981	8100	3084.5	143.324	56.5746	-1.34106	4.29696e-41	1.25337e-38	yes
Unigene0021986	1631.5	390.5	41.4636	10.3256	-2.00561	2.3346e-41	6.95697e-39	yes
Unigene0021989	92.5	0	1.24085	0.001	-10.2771	1.0313e-22	1.0707e-20	yes
Unigene0022022	73.5	2	2.11765	0.05965	-5.1498	1.37832e-13	6.76626e-12	yes
Unigene0022027	87	32.5	1.2844	0.5027	-1.35332	0.000560708	0.0060409	yes
Unigene0022073	55	5	2.36395	0.2059	-3.52118	8.54154e-05	0.00113494	yes
Unigene0022081	54	21	0.76375	0.3133	-1.28556	0.00661248	0.049886	yes
Unigene0022127	23	3.5	0.5027	0.077	-2.70677	0.00157833	0.0148712	yes
Unigene0022129	91.5	193.5	3.9438	8.89015	1.17262	0.005571	0.0432877	yes
Unigene0022139	43.5	10.5	0.51725	0.1271	-2.0249	0.000384746	0.00431813	yes
Unigene0022154	35.5	0	1.20275	0.001	-10.2321	0.000660845	0.00698729	yes
Unigene0022169	2292	964.5	40.1857	17.3458	-1.2121	0.000175424	0.00215677	yes
Unigene0022175	17.5	0	0.49185	0.001	-8.94207	0.00503941	0.0398705	yes
Unigene0022179	24.5	4.5	0.8645	0.1678	-2.36512	0.00417693	0.0340837	yes
Unigene0022190	50.5	12.5	0.49885	0.12715	-1.97207	0.000129986	0.00165457	yes
Unigene0022199	20	3	0.83275	0.135	-2.62492	0.00597843	0.0457948	yes
Unigene0022208	88	27.5	1.72105	0.55525	-1.63208	0.000443847	0.00488693	yes
Unigene0022214	89.5	18.5	5.40835	1.1782	-2.1986	4.24165e-07	8.99722e-06	yes
Unigene0022245	0	8.5	0.001	0.38565	8.59115	0.00608112	0.0464523	yes
Unigene0022256	82.5	24.5	0.64425	0.2032	-1.66472	0.00020047	0.00241938	yes
Unigene0022259	104	40	1.6352	0.66685	-1.29403	0.00272614	0.0236416	yes
Unigene0022262	12	0.5	0.502	0.02015	-4.63884	0.00362661	0.0301965	yes
Unigene0022265	1074.5	274.5	12.1222	3.17685	-1.93199	1.53133e-18	1.17414e-16	yes
Unigene0022267	51	10	0.54725	0.10685	-2.35661	0.000141934	0.0017885	yes
Unigene0022271	109.5	33.5	1.1376	0.35885	-1.66454	5.59204e-06	9.73732e-05	yes
Unigene0022275	85	18	1.7011	0.3713	-2.19581	4.24055e-07	8.99722e-06	yes
Unigene0022294	196	51.5	2.854	0.79405	-1.84568	1.52873e-06	2.94574e-05	yes
Unigene0022302	70.5	15	1.93865	0.4258	-2.1868	6.74229e-06	0.000115219	yes
Unigene0022304	1032.5	355	28.7261	10.3101	-1.47831	1.31531e-18	1.00991e-16	yes
Unigene0022314	28	1038	1.06125	39.9421	5.23408	9.65085e-53	4.32554e-50	yes
Unigene0022331	362	117	4.93115	1.69495	-1.54068	8.43054e-06	0.000141352	yes
Unigene0022340	316	52	4.0537	0.6843	-2.56654	1.5823e-19	1.29808e-17	yes
Unigene0022349	70.5	24.5	1.48935	0.5363	-1.47357	0.000924979	0.00938237	yes
Unigene0022358	2206.5	1026.5	49.2408	23.7621	-1.05119	3.3907e-16	2.12174e-14	yes
Unigene0022365	346	1370	4.0786	16.6893	2.03277	5.94177e-30	9.8073e-28	yes
Unigene0022366	1	12.5	0.07085	0.90935	3.682	0.00527725	0.0414312	yes
Unigene0022385	107	36.5	2.3299	0.81175	-1.52116	4.74844e-05	0.00067695	yes
Unigene0022386	260	78	4.95215	1.56935	-1.65789	3.74251e-07	7.99089e-06	yes
Unigene0022389	48	6	0.8106	0.1094	-2.88938	0.000156945	0.00195354	yes
Unigene0022417	72	17.5	1.1194	0.27815	-2.00879	0.00394814	0.0324619	yes
Unigene0022423	152.5	39.5	1.23375	0.32765	-1.91282	1.3365e-08	3.62598e-07	yes
Unigene0022447	189	70	4.65635	1.7726	-1.39333	1.98702e-06	3.75402e-05	yes
Unigene0022452	4552	1202	24.3285	6.63735	-1.87397	5.64922e-57	2.91061e-54	yes
Unigene0022462	8	35	0.15315	0.70315	2.19889	0.000566625	0.00609869	yes
Unigene0022463	43.5	0	0.8625	0.001	-9.75238	0.000369627	0.00416285	yes
Unigene0022469	47	15.5	1.05475	0.37125	-1.50644	0.00630727	0.0479473	yes
Unigene0022491	158	30.5	4.14885	0.8265	-2.32762	7.4873e-12	3.03283e-10	yes
Unigene0022530	23.5	0	0.72465	0.001	-9.50114	0.00210451	0.0189698	yes
Unigene0022535	9	54.5	0.32405	2.0228	2.64207	1.87478e-05	0.000292375	yes
Unigene0022545	206	32	1.8024	0.28765	-2.64753	2.7166e-16	1.72142e-14	yes
Unigene0022546	35	9	0.57075	0.14975	-1.9303	0.0018969	0.0174028	yes
Unigene0022551	180	75.5	2.04635	0.88875	-1.2032	1.71779e-05	0.000269878	yes
Unigene0022562	191.5	549.5	2.239	6.6974	1.58075	7.24977e-13	3.28678e-11	yes
Unigene0022587	100	32	0.91465	0.29795	-1.61815	0.000333232	0.00379136	yes
Unigene0022588	88.5	26.5	1.5663	0.48595	-1.68848	3.9493e-05	0.000574186	yes
Unigene0022611	28.5	5.5	0.5431	0.11255	-2.27065	0.00491014	0.0390191	yes
Unigene0022615	153.5	19	3.0385	0.39295	-2.95094	1.97137e-15	1.15249e-13	yes
Unigene0022620	251.5	1082.5	11.0079	49.5433	2.17015	1.32431e-30	2.30309e-28	yes
Unigene0022648	104	12.5	2.81585	0.34675	-3.0216	2.62302e-11	1.00003e-09	yes
Unigene0022651	73.5	29	0.6682	0.27025	-1.30599	0.00167184	0.015603	yes
Unigene0022657	787	352	7.239	3.3828	-1.09757	3.38948e-06	6.12451e-05	yes
Unigene0022661	564.5	113.5	11.9067	2.48685	-2.25938	7.43393e-27	1.00694e-24	yes
Unigene0022678	53.5	0	1.0258	0.001	-10.0025	0.000228521	0.00272333	yes
Unigene0022688	416	125	5.3817	1.6798	-1.67977	4.16885e-12	1.73584e-10	yes
Unigene0022689	24.5	95	0.6839	2.72845	1.99622	6.09316e-07	1.2595e-05	yes
Unigene0022690	143.5	326.5	1.30295	3.0573	1.23048	1.29774e-07	3.0003e-06	yes
Unigene0022701	14	53	0.3055	1.2445	2.02632	0.00132015	0.0127169	yes
Unigene0022704	44	0	2.00275	0.001	-10.9678	0.00036003	0.00406807	yes
Unigene0022705	69	1	3.3834	0.0532	-5.9909	0.00118506	0.0115938	yes
Unigene0022711	104	42.5	1.65675	0.7048	-1.23307	0.000425988	0.00471383	yes
Unigene0022760	327	117.5	3.02935	1.162	-1.3824	0.000186635	0.00227532	yes
Unigene0022765	233.5	105.5	4.2507	2.0016	-1.08655	3.37743e-05	0.000499047	yes
Unigene0022803	12.5	45	0.96575	3.5465	1.87667	0.000773306	0.00801496	yes
Unigene0022805	194	477	4.68075	11.9569	1.35303	2.99769e-11	1.13737e-09	yes
Unigene0022806	10.5	42.5	0.2837	1.19885	2.07921	0.000527443	0.00572503	yes
Unigene0022807	19.5	54	0.83655	2.3919	1.51563	0.00491168	0.0390223	yes
Unigene0022825	86.5	37.5	1.18335	0.5302	-1.15827	0.00161204	0.0151397	yes
Unigene0022828	46.5	0	0.51985	0.001	-9.02195	1.51295e-11	5.95224e-10	yes
Unigene0022845	379	177.5	3.98095	1.95355	-1.02701	0.00085338	0.00873973	yes
Unigene0022855	125	921	1.12645	8.6187	2.93569	1.12627e-55	5.59371e-53	yes
Unigene0022856	215	55	1.75645	0.46955	-1.90331	1.11086e-10	3.9459e-09	yes
Unigene0022864	51.5	9	1.00045	0.183	-2.45073	1.21835e-05	0.00019778	yes
Unigene0022870	132.5	52.5	11.5648	4.79525	-1.27007	0.000147733	0.0018531	yes
Unigene0022872	42.5	12.5	1.8132	0.5487	-1.72445	0.00142711	0.0136069	yes
Unigene0022875	9	63	0.11275	0.86235	2.93515	0.00336662	0.0283877	yes
Unigene0022901	537.5	254	4.08085	2.00585	-1.02466	5.16263e-08	1.27457e-06	yes
Unigene0022921	36	0	0.8664	0.001	-9.75889	0.000634046	0.00674013	yes
Unigene0022922	47	5	0.8274	0.08955	-3.20782	1.18548e-06	2.33408e-05	yes
Unigene0022924	11	41.5	0.2724	1.04185	1.93535	0.00141263	0.0134922	yes
Unigene0022932	7966	3735	47.4173	22.8257	-1.05476	3.54299e-13	1.66799e-11	yes
Unigene0022943	139.5	62.5	2.77145	1.3062	-1.08527	0.00126881	0.0122813	yes
Unigene0022957	406.5	1584	28.9	118.519	2.03598	3.71934e-21	3.45191e-19	yes
Unigene0022963	835	74.5	9.62275	0.88835	-3.43725	8.21479e-61	4.8178e-58	yes
Unigene0022975	98	38	2.17545	0.8611	-1.33706	0.000755355	0.00786143	yes
Unigene0023013	328	100.5	3.0951	0.96565	-1.68041	1.12254e-08	3.07882e-07	yes
Unigene0023018	52	14	1.16665	0.32645	-1.83744	0.000899929	0.00915354	yes
Unigene0023022	246.5	88.5	7.54615	2.8159	-1.42214	2.1432e-07	4.7719e-06	yes
Unigene0023027	520.5	10	7.3064	0.14835	-5.62208	2.66664e-66	1.75011e-63	yes
Unigene0023035	183.5	84	3.3227	1.60565	-1.0492	0.00267318	0.0232335	yes
Unigene0023042	2804	1274.5	34.8982	16.4687	-1.08343	1.29004e-19	1.06625e-17	yes
Unigene0023045	22.5	2.5	0.6545	0.08185	-2.99934	0.00361463	0.0301059	yes
Unigene0023056	50	3	1.26825	0.07295	-4.11979	3.38491e-06	6.11851e-05	yes
Unigene0023059	7	26.5	0.1834	0.7313	1.99547	0.00518947	0.0408537	yes
Unigene0023092	2279.5	514.5	26.9835	6.3146	-2.09531	4.29814e-44	1.50925e-41	yes
Unigene0023093	12611.5	6034	77.4244	38.2701	-1.01657	1.77987e-25	2.22499e-23	yes
Unigene0023116	408	146	7.9323	2.9557	-1.42424	1.50526e-09	4.59235e-08	yes
Unigene0023123	1208.5	4680	6.73515	26.775	1.9911	4.24285e-43	1.4176e-40	yes
Unigene0023124	31	70.5	0.269	0.6384	1.24685	0.00599055	0.0458812	yes
Unigene0023127	140.5	47	2.5782	0.86585	-1.57418	0.000383805	0.0043102	yes
Unigene0023128	258	72.5	2.43115	0.72445	-1.74668	3.35381e-07	7.228e-06	yes
Unigene0023133	9046	4337	72.999	36.3755	-1.00491	2.89464e-24	3.30391e-22	yes
Unigene0023135	213	70	1.21	0.4153	-1.54278	4.69699e-08	1.16745e-06	yes
Unigene0023147	759.5	1540.5	21.4919	45.0918	1.06907	3.68232e-14	1.90792e-12	yes
Unigene0023156	33	2	1.0283	0.06035	-4.09076	4.0059e-06	7.15855e-05	yes
Unigene0023174	305.5	87	3.07895	0.9118	-1.75565	1.43245e-12	6.33784e-11	yes
Unigene0023178	73	29	2.49835	1.037	-1.26856	0.00204909	0.0185766	yes
Unigene0023190	92.5	27	3.15225	0.97825	-1.68811	0.000249259	0.00293522	yes
Unigene0023195	24	5	0.7571	0.16645	-2.18539	0.00358938	0.0299408	yes
Unigene0023200	251	74	1.721	0.5329	-1.69131	1.50511e-08	4.04955e-07	yes
Unigene0023210	47.5	0	1.04775	0.001	-10.0331	4.46633e-12	1.84714e-10	yes
Unigene0023222	1518.5	367.5	22.7799	5.7146	-1.99504	4.88829e-42	1.55772e-39	yes
Unigene0023248	8.5	0	0.25	0.001	-7.96578	0.00643423	0.048731	yes
Unigene0023255	118	2.5	3.2894	0.0675	-5.60679	2.84261e-21	2.6561e-19	yes
Unigene0023259	172	54.5	1.69985	0.57495	-1.5639	0.000107825	0.00140031	yes
Unigene0023267	3	22	0.0803	0.61435	2.93559	0.00076365	0.0079268	yes
Unigene0023268	7	49.5	0.26165	1.91085	2.8685	1.23812e-06	2.42991e-05	yes
Unigene0023273	274	8	6.9642	0.20405	-5.09296	6.10003e-36	1.41298e-33	yes
Unigene0023279	381.5	121	3.71755	1.2316	-1.59382	1.92941e-10	6.63131e-09	yes
Unigene0023293	219.5	103	2.60325	1.2621	-1.04449	4.93481e-05	0.000698821	yes
Unigene0023315	53.5	12.5	1.9805	0.4932	-2.00562	0.000281882	0.00327362	yes
Unigene0023332	239.5	84	1.30005	0.47005	-1.46768	2.99943e-08	7.7305e-07	yes
Unigene0023356	79.5	23	0.47805	0.1451	-1.72011	5.11021e-05	0.000720698	yes
Unigene0023362	10	0	0.4089	0.001	-8.6756	0.00410111	0.0335446	yes
Unigene0023373	351	43.5	5.4167	0.69935	-2.95333	2.84901e-18	2.11107e-16	yes
Unigene0023380	57.5	3	0.5421	0.0272	-4.31688	8.57362e-08	2.04083e-06	yes
Unigene0023381	4179	24748.5	60.312	367.364	2.60669	5.43844e-79	5.87874e-76	yes
Unigene0023390	66	10	1.3102	0.19955	-2.71496	3.12828e-06	5.69924e-05	yes
Unigene0023400	122.5	48	1.7246	0.6801	-1.34244	0.0020284	0.0184132	yes
Unigene0023408	48.5	15.5	0.44685	0.14555	-1.61828	0.0016018	0.0150641	yes
Unigene0023409	65	8.5	0.6143	0.0854	-2.84664	4.27222e-06	7.59507e-05	yes
Unigene0023427	204.5	62.5	2.4549	0.78565	-1.64371	1.20364e-07	2.79981e-06	yes
Unigene0023453	81.5	18.5	1.2182	0.295	-2.04596	8.77372e-05	0.00116131	yes
Unigene0023458	70.5	24	0.7835	0.28325	-1.46786	0.00663634	0.0499938	yes
Unigene0023462	55.5	0	1.3475	0.001	-10.3961	1.46925e-14	7.84865e-13	yes
Unigene0023468	30.5	0	1.0935	0.001	-10.0947	0.000974715	0.00979912	yes
Unigene0023470	213	80.5	4.96575	1.97695	-1.32874	3.75077e-05	0.000547896	yes
Unigene0023519	21.5	0	0.8914	0.001	-9.79993	0.00275502	0.023847	yes
Unigene0023521	292	35	10.417	1.29455	-3.00842	1.12559e-24	1.31468e-22	yes
Unigene0023523	174.5	7	3.49495	0.1516	-4.52693	3.12846e-11	1.18454e-09	yes
Unigene0023525	163.5	6	7.1035	0.2581	-4.78253	1.92574e-21	1.821e-19	yes
Unigene0023526	836	395	15.5396	7.6098	-1.03002	5.91427e-11	2.1722e-09	yes
Unigene0023550	1108	432.5	9.3644	3.8348	-1.28804	8.46309e-12	3.41054e-10	yes
Unigene0023580	2534	1137	47.872	22.15	-1.11188	1.07435e-14	5.80096e-13	yes
Unigene0023582	523.5	5032.5	4.54725	45.1516	3.31171	4.78885e-131	1.55297e-127	yes
Unigene0023589	42	0	1.66765	0.001	-10.7036	0.000150658	0.00188465	yes
Unigene0023601	39.5	4	0.5366	0.0549	-3.28897	7.89871e-06	0.000133042	yes
Unigene0023619	399	116	5.55155	1.6964	-1.71041	4.47213e-11	1.66471e-09	yes
Unigene0023621	6	470.5	0.1847	14.1889	6.26343	3.44322e-11	1.29837e-09	yes
Unigene0023633	44	6	1.45655	0.2145	-2.76351	0.000416151	0.00462353	yes
Unigene0023636	43	0	2.2793	0.001	-11.1544	0.000384498	0.00431659	yes
Unigene0023639	54.5	7	1.1205	0.14905	-2.91027	0.000178643	0.00219022	yes
Unigene0023650	80	5.5	1.0575	0.07785	-3.76382	8.4331e-11	3.04658e-09	yes
Unigene0023656	82	31.5	0.91635	0.3665	-1.32209	0.00137645	0.0131992	yes
Unigene0023667	157	72	3.72185	1.77675	-1.06678	0.00121584	0.0118403	yes
Unigene0023685	3624.5	9695.5	93.2048	261.224	1.48681	1.29721e-19	1.07057e-17	yes
Unigene0023699	211.5	52.5	6.05905	1.52635	-1.98901	7.46316e-07	1.51572e-05	yes
Unigene0023716	16.5	0.5	0.37845	0.01285	-4.88026	0.000348039	0.00394552	yes
Unigene0023717	22.5	0	0.42405	0.001	-8.72809	1.31531e-06	2.56951e-05	yes
Unigene0023718	12	0	0.4356	0.001	-8.76686	0.000677326	0.00713554	yes
Unigene0023728	1307.5	2863	10.9197	24.7857	1.18258	1.21144e-23	1.33039e-21	yes
Unigene0023746	251.5	101	5.567	2.3576	-1.23958	0.000173847	0.00213929	yes
Unigene0023758	17.5	126.5	0.44415	3.3457	2.91319	1.81397e-13	8.7953e-12	yes
Unigene0023764	38	10.5	1.244	0.3528	-1.81806	0.00185673	0.0170827	yes
Unigene0023766	38	4	1.06395	0.1213	-3.13278	3.27936e-05	0.000485727	yes
Unigene0023773	29	3	0.44535	0.0471	-3.24114	6.80151e-05	0.000932042	yes
Unigene0023778	1131	226	14.6674	3.04405	-2.26854	1.36859e-42	4.43816e-40	yes
Unigene0023790	95	34.5	1.23	0.4639	-1.40677	0.0018123	0.0167438	yes
Unigene0023804	52	125	1.20885	2.95915	1.29155	0.000524136	0.00569249	yes
Unigene0023808	31	1	0.66035	0.0238	-4.7942	6.16935e-07	1.27334e-05	yes
Unigene0023809	59.5	20.5	1.2655	0.4534	-1.48085	0.000852901	0.00873646	yes
Unigene0023838	226	1	2.46885	0.0122	-7.66081	2.52596e-41	7.44672e-39	yes
Unigene0023847	66	191.5	1.0316	3.11935	1.59636	2.36436e-05	0.000361165	yes
Unigene0023852	51	12.5	1.0978	0.28015	-1.97034	0.00052809	0.00573093	yes
Unigene0023853	90	219.5	0.93525	2.347	1.32739	4.27372e-06	7.59529e-05	yes
Unigene0023864	170.5	52	2.99895	0.95275	-1.65429	5.77523e-08	1.41127e-06	yes
Unigene0023866	660.5	147.5	15.7968	3.719	-2.08665	5.70258e-17	3.83856e-15	yes
Unigene0023872	195.5	84	7.9406	3.57455	-1.15149	0.000133676	0.00169412	yes
Unigene0023875	1315	446.5	15.9402	5.60585	-1.50766	9.11329e-24	1.00481e-21	yes
Unigene0023880	85.5	24	0.8987	0.2528	-1.82984	0.000651307	0.00689967	yes
Unigene0023896	1473.5	677.5	12.2886	5.8707	-1.06572	2.51155e-14	1.31866e-12	yes
Unigene0023898	103.5	22.5	1.2816	0.28815	-2.15305	3.04591e-08	7.83931e-07	yes
Unigene0023920	53.5	9	1.1029	0.19865	-2.473	2.57384e-05	0.000389603	yes
Unigene0023923	211	1.5	4.57175	0.03395	-7.07319	4.19725e-12	1.74502e-10	yes
Unigene0023930	50.5	4	0.54425	0.0438	-3.63527	2.18631e-06	4.10522e-05	yes
Unigene0023933	11	52	0.34725	1.7404	2.32537	4.21596e-05	0.000608911	yes
Unigene0023951	53	150.5	0.164	0.4749	1.53393	0.000111863	0.00144593	yes
Unigene0023952	668	182	9.45655	2.63495	-1.84354	4.17467e-12	1.73695e-10	yes
Unigene0023959	4050.5	1640	33.4813	14.1417	-1.2434	1.45825e-22	1.48599e-20	yes
Unigene0023961	1385	14	12.031	0.12525	-6.5858	2.87884e-155	2.64512e-151	yes
Unigene0023962	48.5	108	0.79105	1.8721	1.24282	0.00357748	0.0298564	yes
Unigene0023972	73.5	19.5	1.2675	0.35645	-1.83021	0.000132354	0.00167968	yes
Unigene0023981	17	1.5	0.7886	0.0668	-3.56137	0.00360162	0.0300339	yes
Unigene0023982	16.5	0.5	0.39435	0.0115	-5.09977	0.000373422	0.00420388	yes
Unigene0023997	21.5	2.5	0.2663	0.03245	-3.03676	0.00116269	0.0114013	yes
Unigene0024018	16	1	0.8873	0.05285	-4.06945	0.00508498	0.0401561	yes
Unigene0024024	504	1029.5	9.7569	20.6299	1.08024	6.93445e-13	3.14901e-11	yes
Unigene0024047	242	96.5	2.05865	0.8574	-1.26366	2.05492e-06	3.87431e-05	yes
Unigene0024048	11	201	0.14835	2.77305	4.2244	1.91422e-25	2.38215e-23	yes
Unigene0024058	36	7.5	0.64605	0.13905	-2.21604	0.000645401	0.00684237	yes
Unigene0024061	25	5	0.48785	0.10285	-2.2459	0.00250781	0.0219903	yes
Unigene0024075	43.5	12	0.46465	0.13635	-1.76883	0.00520997	0.0409905	yes
Unigene0024079	40.5	94.5	0.3147	0.75185	1.25647	0.000982853	0.00986773	yes
Unigene0024084	70	15	1.7307	0.37065	-2.22323	8.47158e-05	0.00112891	yes
Unigene0024086	243	502.5	2.8314	6.0877	1.10438	3.48454e-06	6.28391e-05	yes
Unigene0024095	1110.5	510.5	11.9859	5.75475	-1.05851	6.40765e-11	2.3456e-09	yes
Unigene0024106	1	19.5	0.0307	0.6064	4.30396	0.000150386	0.00188167	yes
Unigene0024141	178.5	10	2.72235	0.1596	-4.09232	1.97425e-20	1.76973e-18	yes
Unigene0024143	5	31	0.1533	0.9437	2.62197	0.00176355	0.0163482	yes
Unigene0024148	15.5	85	0.23555	1.3326	2.50014	8.08341e-08	1.9283e-06	yes
Unigene0024156	27.5	3.5	0.69435	0.0908	-2.9349	0.000191521	0.00232512	yes
Unigene0024159	219	55.5	8.89255	2.3575	-1.91534	2.22088e-10	7.5764e-09	yes
Unigene0024160	121.5	17.5	4.4714	0.663	-2.75365	7.6519e-12	3.09495e-10	yes
Unigene0024172	23.5	2.5	0.5812	0.06365	-3.1908	0.000274635	0.00320092	yes
Unigene0024173	9431	4212	46.8625	21.7417	-1.10797	1.37761e-29	2.2536e-27	yes
Unigene0024177	261	77	4.5856	1.4179	-1.69335	2.35373e-09	7.01398e-08	yes
Unigene0024178	729	269	13.3965	5.1962	-1.36633	4.41895e-10	1.44265e-08	yes
Unigene0024213	494.5	1131.5	3.4649	8.2263	1.24743	6.92e-17	4.61855e-15	yes
Unigene0024238	303	670	5.50025	12.5864	1.1943	3.54296e-10	1.17168e-08	yes
Unigene0024247	362	131.5	4.6218	1.7283	-1.4191	1.25622e-07	2.91473e-06	yes
Unigene0024261	303.5	143.5	3.0121	1.47825	-1.02688	6.44947e-06	0.000110695	yes
Unigene0024276	59.5	19	1.2608	0.42845	-1.55714	0.00220281	0.0197397	yes
Unigene0024278	88	262	1.3538	4.1685	1.62251	4.45704e-10	1.45392e-08	yes
Unigene0024280	4642	320	110.968	7.8094	-3.82879	1.15873e-15	6.90588e-14	yes
Unigene0024291	301.5	42.5	3.01955	0.4421	-2.77189	9.72981e-23	1.01398e-20	yes
Unigene0024295	641.5	57.5	16.4874	1.52595	-3.43358	2.14751e-13	1.03217e-11	yes
Unigene0024309	503.5	156	2.61675	0.8423	-1.63537	2.1413e-15	1.24261e-13	yes
Unigene0024312	87	13	1.58075	0.2569	-2.62133	4.76162e-05	0.000678572	yes
Unigene0024315	277	84.5	2.82925	0.8874	-1.67276	2.20256e-10	7.51857e-09	yes
Unigene0024334	96	37	1.54805	0.61975	-1.32069	0.000258868	0.0030367	yes
Unigene0024341	11	245	0.10195	2.28855	4.4885	1.81863e-16	1.16989e-14	yes
Unigene0024342	105	7574.5	1.46175	106.762	6.19056	6.71016e-88	9.73485e-85	yes
Unigene0024349	54	0	1.65785	0.001	-10.6951	0.000222409	0.00265738	yes
Unigene0024358	1320.5	502.5	7.66215	3.0102	-1.34789	5.05097e-20	4.35086e-18	yes
Unigene0024360	26	4	0.7066	0.1057	-2.74092	0.0044906	0.0362357	yes
Unigene0024380	1792.5	607	10.5573	3.71045	-1.50857	4.51635e-27	6.20902e-25	yes
Unigene0024394	110.5	237.5	1.45485	3.22095	1.14662	1.44648e-05	0.000231005	yes
Unigene0024395	1.5	21.5	0.0664	0.9591	3.85243	0.000807841	0.00832594	yes
Unigene0024396	117	0	2.383	0.001	-11.2186	4.90335e-05	0.000695438	yes
Unigene0024403	950	443	10.0014	4.8415	-1.04668	1.62543e-10	5.63575e-09	yes
Unigene0024416	256.5	81	3.8516	1.27285	-1.5974	7.0584e-09	1.97725e-07	yes
Unigene0024451	3	80.5	0.13285	3.70875	4.80306	1.09293e-10	3.88723e-09	yes
Unigene0024454	39	13.5	0.69445	0.24945	-1.47712	0.00655543	0.0495264	yes
Unigene0024456	810.5	350	20.3599	9.0903	-1.16333	3.23362e-12	1.36917e-10	yes
Unigene0024467	193.5	31.5	2.1659	0.36995	-2.54956	5.87834e-13	2.69831e-11	yes
Unigene0024487	1017	466.5	23.0387	11.0332	-1.06221	6.98688e-11	2.54412e-09	yes
Unigene0024489	4452	347.5	76.9764	6.2688	-3.61816	6.91983e-142	3.46803e-138	yes
Unigene0024497	172.5	4.5	2.98335	0.084	-5.1504	1.3636e-25	1.7124e-23	yes
Unigene0024507	23.5	1106.5	0.65095	31.087	5.57762	1.02449e-43	3.48636e-41	yes
Unigene0024513	693.5	305	15.1756	6.9249	-1.13189	1.11822e-10	3.96695e-09	yes
Unigene0024528	55	9	0.6053	0.10365	-2.54593	3.77068e-06	6.77334e-05	yes
Unigene0024529	0	30.5	0.001	1.782	10.7993	0.000125408	0.00160074	yes
Unigene0024534	18.5	2.5	0.86115	0.11905	-2.8547	0.00302915	0.0258785	yes
Unigene0024537	22.5	3.5	0.58185	0.0917	-2.66565	0.00175843	0.0163145	yes
Unigene0024538	5.5	198.5	0.095	3.55315	5.22503	2.43752e-31	4.46439e-29	yes
Unigene0024565	98	44.5	1.2436	0.58125	-1.09729	0.00226489	0.0202087	yes
Unigene0024566	2792.5	1024.5	13.6786	5.20185	-1.39482	1.34941e-30	2.33936e-28	yes
Unigene0024574	70	162.5	0.737	1.7736	1.26694	1.02537e-05	0.000169295	yes
Unigene0024580	568.5	253	8.2481	3.8051	-1.11613	5.43769e-09	1.54922e-07	yes
Unigene0024585	3.5	24	0.10545	0.73145	2.7942	0.00101791	0.010177	yes
Unigene0024589	161.5	70	1.9602	0.8772	-1.16002	6.84041e-05	0.000936208	yes
Unigene0024591	23	1	0.60815	0.02565	-4.5674	3.46881e-05	0.000510634	yes
Unigene0024597	19	76	0.2295	0.92375	2.00901	0.000204546	0.0024621	yes
Unigene0024608	53	6.5	0.97715	0.1234	-2.98524	7.2559e-07	1.47769e-05	yes
Unigene0024629	56	12	1.6192	0.36	-2.16921	0.000109559	0.00141985	yes
Unigene0024630	25	59	0.4037	1.0019	1.31138	0.00401452	0.032934	yes
Unigene0024648	1234.5	2670.5	10.255	22.8741	1.15738	7.22244e-18	5.22527e-16	yes
Unigene0024666	22	380.5	0.3169	5.5296	4.12508	1.4106e-19	1.16067e-17	yes
Unigene0024667	32	0	0.59715	0.001	-9.22195	0.000869442	0.00888443	yes
Unigene0024676	14893.5	5567	325.395	126.634	-1.36152	7.41348e-42	2.30903e-39	yes
Unigene0024677	1830.5	846	19.9959	9.61315	-1.05662	2.84564e-15	1.63926e-13	yes
Unigene0024696	954.5	3087.5	7.4741	24.8459	1.73304	2.29772e-31	4.22237e-29	yes
Unigene0024698	63.5	136	1.33035	2.9272	1.13772	0.000361449	0.00408159	yes
Unigene0024700	147	618	7.93585	34.963	2.13937	2.83397e-19	2.26426e-17	yes
Unigene0024701	51.5	196	2.79145	11.3005	2.0173	5.32641e-07	1.11059e-05	yes
Unigene0024723	25	145.5	0.28835	1.7089	2.56718	5.10693e-06	8.95484e-05	yes
Unigene0024724	652	262	11.8632	4.9784	-1.25274	3.05634e-10	1.0187e-08	yes
Unigene0024727	43	92	0.84895	1.8557	1.12821	0.00310788	0.0264895	yes
Unigene0024734	58	3	0.96665	0.0497	-4.28168	0.000361582	0.00408225	yes
Unigene0024756	851.5	311	8.0279	3.0527	-1.39494	5.61334e-16	3.44608e-14	yes
Unigene0024766	2.5	18.5	0.08115	0.61465	2.9211	0.00584171	0.0449913	yes
Unigene0024777	298	106.5	3.24295	1.2468	-1.37908	0.00642104	0.0486492	yes
Unigene0024783	43	12	0.49005	0.1398	-1.80956	0.000830221	0.00852949	yes
Unigene0024804	483.5	130.5	3.868	1.07455	-1.84786	9.07978e-17	5.98755e-15	yes
Unigene0024813	1081.5	224.5	24.4822	5.17575	-2.24189	2.15253e-07	4.79076e-06	yes
Unigene0024823	25.5	2	0.8098	0.0661	-3.61484	4.19317e-05	0.000606573	yes
Unigene0024836	102.5	301.5	1.143	3.4633	1.59932	4.20869e-07	8.93762e-06	yes
Unigene0024838	367.5	159	13.3021	6.08115	-1.12924	0.000406459	0.00453892	yes
Unigene0024879	1459.5	683	22.0618	10.7294	-1.03998	1.14494e-11	4.5685e-10	yes
Unigene0024908	1420.5	648.5	17.8228	8.4976	-1.0686	1.18795e-09	3.67306e-08	yes
Unigene0024914	93	7.5	1.55125	0.13115	-3.56414	4.75371e-06	8.38615e-05	yes
Unigene0024946	1664.5	734	16.796	7.72185	-1.12109	6.10274e-15	3.40524e-13	yes
Unigene0024949	113	6	1.68455	0.09155	-4.20166	1.04871e-14	5.67923e-13	yes
Unigene0024960	2476	7761.5	57.2807	184.08	1.68421	2.78527e-24	3.19229e-22	yes
Unigene0024962	23	0	0.4251	0.001	-8.73166	9.8267e-07	1.96068e-05	yes
Unigene0024972	316	1089	3.06235	10.8506	1.82507	2.36538e-17	1.64027e-15	yes
Unigene0024979	64	20	0.7936	0.26565	-1.57889	0.00256715	0.0224144	yes
Unigene0025006	2064	870	13.4114	5.87215	-1.19149	5.38548e-19	4.22327e-17	yes
Unigene0025021	473.5	228.5	5.40885	2.70045	-1.00212	2.71908e-07	5.94842e-06	yes
Unigene0025031	497	81	6.1957	1.04885	-2.56246	3.62843e-28	5.45045e-26	yes
Unigene0025035	9.5	0	0.59355	0.001	-9.21323	0.00356643	0.02979	yes
Unigene0025046	114.5	39	1.27205	0.44375	-1.51934	5.86737e-05	0.000817236	yes
Unigene0025051	1855	853	30.9212	14.7	-1.07277	2.06066e-14	1.08503e-12	yes
Unigene0025064	55	9.5	0.73425	0.1294	-2.50443	3.06918e-06	5.59526e-05	yes
Unigene0025065	117.5	0	4.12095	0.001	-12.0088	4.87695e-05	0.000692228	yes
Unigene0025078	90	207.5	1.0005	2.35655	1.23596	0.000158507	0.00196987	yes
Unigene0025087	68	164	0.5622	1.41755	1.33424	0.000242617	0.00286714	yes
Unigene0025088	37	5.5	0.58355	0.0899	-2.69846	0.000990856	0.00993671	yes
Unigene0025107	79.5	168	1.79	3.90885	1.12678	0.000121948	0.00156128	yes
Unigene0025108	47	4	0.7257	0.06645	-3.44903	6.11477e-07	1.2635e-05	yes
Unigene0025111	0	39	0.001	0.9233	9.85066	6.46637e-07	1.32967e-05	yes
Unigene0025114	0	13	0.001	0.59875	9.22581	0.000850986	0.00872169	yes
Unigene0025119	43	99	0.40475	0.98245	1.27935	0.00220216	0.0197371	yes
Unigene0025135	452	193.5	10.7723	4.84855	-1.1517	3.68328e-06	6.62498e-05	yes
Unigene0025146	39.5	10.5	1.04805	0.28685	-1.86934	0.000848979	0.00870436	yes
Unigene0025173	769	2791	6.0781	22.0327	1.85795	7.4169e-05	0.00100439	yes
Unigene0025181	259.5	531	7.4371	15.9561	1.1013	1.6636e-06	3.18167e-05	yes
Unigene0025184	125.5	51.5	2.6971	1.14165	-1.24029	0.000133807	0.00169539	yes
Unigene0025186	1542.5	710	22.3954	10.6979	-1.06587	4.63679e-15	2.60573e-13	yes
Unigene0025188	135	53.5	1.4469	0.59925	-1.27174	0.000175025	0.00215282	yes
Unigene0025213	215.5	17.5	2.96745	0.25105	-3.56318	2.07449e-23	2.24245e-21	yes
Unigene0025221	219	85.5	3.52635	1.4589	-1.27329	0.000306188	0.00352177	yes
Unigene0025226	22.5	124	0.4306	2.44695	2.50656	2.64525e-11	1.00781e-09	yes
Unigene0025236	44.5	4	0.5341	0.04835	-3.46552	3.74258e-07	7.99089e-06	yes
Unigene0025238	438	164	3.22335	1.26825	-1.34572	5.1233e-08	1.26542e-06	yes
Unigene0025239	820	358.5	9.45835	4.28405	-1.14261	3.38353e-11	1.27673e-09	yes
Unigene0025246	200.5	82	4.40555	1.8863	-1.22376	0.0004098	0.0045714	yes
Unigene0025263	590	271	3.43785	1.63625	-1.07111	4.10512e-09	1.18674e-07	yes
Unigene0025278	288	126.5	3.684	1.68015	-1.13268	3.49842e-05	0.000514718	yes
Unigene0025280	634.5	292.5	8.3809	4.03495	-1.05455	1.43735e-07	3.29342e-06	yes
Unigene0025291	49	2.5	1.04395	0.056	-4.22048	3.13549e-09	9.19938e-08	yes
Unigene0025300	173.5	76.5	2.2199	1.02645	-1.11283	0.000572313	0.00615751	yes
Unigene0025301	182	408.5	2.46155	5.7214	1.2168	1.25981e-05	0.000203732	yes
Unigene0025305	7506.5	2055.5	132.06	37.6405	-1.81083	5.96241e-61	3.53443e-58	yes
Unigene0025318	61.5	21	0.4269	0.1525	-1.48509	0.000766303	0.00794836	yes
Unigene0025327	808	181	25.6192	6.01995	-2.0894	1.23533e-22	1.27057e-20	yes
Unigene0025329	130	49.5	2.0676	0.82325	-1.32855	5.86433e-05	0.00081702	yes
Unigene0025331	503	119	8.79185	2.17965	-2.01207	1.06108e-14	5.74055e-13	yes
Unigene0025356	609.5	4417.5	8.50435	63.2647	2.89513	5.8738e-71	4.62595e-68	yes
Unigene0025363	39.5	11.5	1.5885	0.47	-1.75693	0.00562233	0.0435573	yes
Unigene0025369	168.5	60	2.8396	1.0683	-1.41037	0.000185445	0.00226331	yes
Unigene0025372	4.5	58.5	0.08895	1.2552	3.81878	6.6577e-07	1.36393e-05	yes
Unigene0025379	2170.5	987	10.022	4.73485	-1.08177	7.00695e-15	3.87838e-13	yes
Unigene0025386	980	228	7.51135	1.8199	-2.04521	2.2515e-29	3.65067e-27	yes
Unigene0025387	55.5	6.5	0.6011	0.0734	-3.03375	2.07801e-07	4.63238e-06	yes
Unigene0025390	14	0.5	1.0926	0.04335	-4.65559	0.00103232	0.0103061	yes
Unigene0025392	26.5	381.5	0.5363	7.93015	3.88624	2.64612e-36	6.23411e-34	yes
Unigene0025412	1999	298	27.0359	4.16205	-2.69951	4.22187e-69	3.06247e-66	yes
Unigene0025418	41.5	5	0.72835	0.0961	-2.92202	0.000234159	0.0027827	yes
Unigene0025431	1343	627	17.3182	8.4384	-1.03725	2.30013e-11	8.84267e-10	yes
Unigene0025447	381.5	16	6.1957	0.2599	-4.57524	3.66495e-14	1.90071e-12	yes
Unigene0025464	111	39	1.04545	0.38155	-1.45418	2.85739e-05	0.000427849	yes
Unigene0025476	39	7	1.1308	0.2179	-2.37561	0.00030291	0.00348989	yes
Unigene0025477	116.5	48	1.4413	0.5998	-1.26482	0.00226062	0.020179	yes
Unigene0025479	212.5	84	3.1458	1.25885	-1.32132	0.000356419	0.00403057	yes
Unigene0025491	332.5	89	5.0865	1.39635	-1.86501	1.52345e-12	6.7002e-11	yes
Unigene0025499	728.5	3755	13.9925	75.1508	2.42513	6.62861e-57	3.3836e-54	yes
Unigene0025500	130	43.5	2.85865	0.9771	-1.54876	1.68487e-05	0.000265008	yes
Unigene0025509	244.5	38	3.76465	0.62235	-2.59672	1.52407e-12	6.7002e-11	yes
Unigene0025517	785	123.5	12.9703	2.0878	-2.63516	1.64322e-19	1.34605e-17	yes
Unigene0025543	309.5	142	5.699	2.6881	-1.08412	7.50755e-05	0.00101453	yes
Unigene0025545	21.5	66.5	0.26755	0.8643	1.69172	0.000560378	0.00603853	yes
Unigene0025574	481.5	211	9.28585	4.2521	-1.12686	2.44795e-07	5.39165e-06	yes
Unigene0025585	350	120.5	4.85635	1.73225	-1.48723	8.19023e-11	2.96273e-09	yes
Unigene0025586	687	134.5	5.3427	1.08595	-2.29861	7.47001e-28	1.09525e-25	yes
Unigene0025588	66.5	24	5.4918	2.0405	-1.42836	0.000841662	0.00863738	yes
Unigene0025592	285	132	3.21945	1.54395	-1.06019	6.8699e-06	0.000117181	yes
Unigene0025594	20	2	0.8959	0.0863	-3.37591	0.00203998	0.0185	yes
Unigene0025595	196	91	2.1096	1.0161	-1.05393	8.91585e-05	0.00117956	yes
Unigene0025597	44.5	3	1.3676	0.103	-3.73093	2.88401e-06	5.29799e-05	yes
Unigene0025609	1881	718	22.7454	8.95345	-1.34506	3.50582e-15	1.99456e-13	yes
Unigene0025612	1435	684.5	7.93465	3.92515	-1.01542	1.86469e-13	9.02534e-12	yes
Unigene0025617	117.5	6.5	1.089	0.06555	-4.05426	5.6531e-12	2.31366e-10	yes
Unigene0025627	184.5	388	3.7734	8.1571	1.11219	1.06855e-06	2.12051e-05	yes
Unigene0025628	0	15.5	0.001	1.04015	10.0226	0.00011273	0.00145509	yes
Unigene0025638	18.5	0	0.29145	0.001	-8.1871	1.80855e-05	0.000282927	yes
Unigene0025640	54	17	1.14645	0.36775	-1.64038	0.0039126	0.0322129	yes
Unigene0025651	24.5	5.5	0.58845	0.13775	-2.09487	0.00615036	0.0469032	yes
Unigene0025654	3072	816	11.9639	3.2888	-1.86305	5.5336e-51	2.38329e-48	yes
Unigene0025656	83.5	7	1.05025	0.0884	-3.57054	5.72013e-10	1.84628e-08	yes
Unigene0025661	40.5	95.5	0.4906	1.1668	1.24994	0.00661255	0.049886	yes
Unigene0025668	102	15	1.70945	0.26085	-2.71224	1.04891e-10	3.74517e-09	yes
Unigene0025674	3864.5	488.5	43.2861	5.66315	-2.93423	6.83752e-96	1.21595e-92	yes
Unigene0025693	558.5	171	11.0898	3.47285	-1.67504	3.59099e-12	1.51236e-10	yes
Unigene0025699	19.5	0	0.5145	0.001	-9.00703	9.7157e-06	0.000160991	yes
Unigene0025708	597.5	3510	7.06385	42.9463	2.60401	5.56396e-95	9.29501e-92	yes
Unigene0025717	511	141	6.51185	1.86955	-1.80038	7.31766e-18	5.28723e-16	yes
Unigene0025718	61.5	18	1.69115	0.52665	-1.68309	0.00108795	0.010779	yes
Unigene0025720	144.5	67	2.39825	1.1439	-1.06802	0.00431308	0.0350495	yes
Unigene0025730	203	80	2.53195	1.02705	-1.30174	1.56298e-05	0.000247886	yes
Unigene0025754	58	20.5	0.7424	0.277	-1.42231	0.00225271	0.020115	yes
Unigene0025788	53.5	12.5	0.7041	0.1684	-2.06389	0.00336606	0.0283872	yes
Unigene0025799	217	50	5.7689	1.3619	-2.08268	1.60062e-11	6.26264e-10	yes
Unigene0025803	68.5	25	0.78335	0.2991	-1.38903	0.000958186	0.00966584	yes
Unigene0025806	416	189	3.47625	1.6401	-1.08375	2.37445e-05	0.000362518	yes
Unigene0025817	52	4.5	1.3273	0.12075	-3.4584	1.75231e-08	4.66232e-07	yes
Unigene0025834	10	0	0.2547	0.001	-7.99266	0.00410438	0.0335563	yes
Unigene0025835	695.5	195	10.357	3.00685	-1.78429	4.78016e-22	4.72268e-20	yes
Unigene0025836	370.5	102.5	3.2831	0.9472	-1.79332	4.83368e-14	2.46966e-12	yes
Unigene0025837	9.5	0	0.3114	0.001	-8.28263	0.00602711	0.0460972	yes
Unigene0025854	632.5	52	5.7314	0.4849	-3.56313	7.62157e-49	3.0228e-46	yes
Unigene0025875	430.5	127.5	4.5616	1.39275	-1.7116	4.33237e-09	1.24981e-07	yes
Unigene0025877	42	0	0.69735	0.001	-9.44574	2.46492e-06	4.57846e-05	yes
Unigene0025890	123	45.5	2.18225	0.8383	-1.38028	0.000100194	0.00130953	yes
Unigene0025892	175.5	31	1.71425	0.3215	-2.41469	6.4042e-10	2.05624e-08	yes
Unigene0025894	38.5	6	1.3238	0.2257	-2.55221	0.000589627	0.00632526	yes
Unigene0025897	274.5	65.5	2.77555	0.69195	-2.00403	5.54354e-11	2.04695e-09	yes
Unigene0025902	22.5	4	0.3615	0.0644	-2.48886	0.00344827	0.0289389	yes
Unigene0025904	756.5	2350	12.1036	38.8763	1.68345	2.35795e-35	5.22055e-33	yes
Unigene0025911	1244.5	440	6.2004	2.2757	-1.44605	1.10401e-22	1.14189e-20	yes
Unigene0025935	414.5	111.5	10.264	2.89365	-1.82663	2.36855e-13	1.12857e-11	yes
Unigene0025958	698	291.5	16.631	7.23645	-1.20052	2.14163e-09	6.41313e-08	yes
Unigene0025967	241.5	546	5.41255	12.767	1.23804	4.46258e-06	7.90799e-05	yes
Unigene0025970	112.5	43.5	1.2	0.4964	-1.27346	0.00504861	0.0399204	yes
Unigene0025971	109	38	2.0558	0.73255	-1.4887	0.000113851	0.00146647	yes
Unigene0025973	153.5	15	0.87315	0.08895	-3.29516	3.14662e-15	1.79576e-13	yes
Unigene0025988	25.5	147.5	0.59865	3.6372	2.60304	1.31486e-10	4.61405e-09	yes
Unigene0025997	114.5	0	2.63915	0.001	-11.3659	5.89683e-06	0.0001021	yes
Unigene0026021	37	184.5	1.8142	9.25935	2.35158	1.36537e-11	5.3958e-10	yes
Unigene0026023	139.5	779	1.93715	11.0626	2.51368	3.91749e-23	4.15321e-21	yes
Unigene0026043	20	61.5	0.52945	1.6612	1.64966	0.00163602	0.0153102	yes
Unigene0026063	85.5	27	1.41765	0.4653	-1.60727	0.000121504	0.00155632	yes
Unigene0026066	9	37.5	0.2548	1.0723	2.07327	0.00164151	0.0153497	yes
Unigene0026068	108.5	4	1.49875	0.0575	-4.70405	2.08478e-19	1.68769e-17	yes
Unigene0026098	1022	2812.5	24.8347	71.0062	1.51559	6.03357e-35	1.30955e-32	yes
Unigene0026101	2	657.5	0.04115	13.7257	8.38177	9.6527e-20	8.07502e-18	yes
Unigene0026102	1	468	0.01005	4.726	8.87728	2.13405e-75	2.02842e-72	yes
Unigene0026103	2.5	369.5	0.05495	8.0602	7.19655	6.9491e-16	4.21913e-14	yes
Unigene0026104	0	609	0.001	4.11575	12.0069	3.33435e-74	2.96483e-71	yes
Unigene0026106	326	136	1.9901	0.85615	-1.21691	3.58062e-07	7.67778e-06	yes
Unigene0026112	45.5	12	0.8363	0.22495	-1.89442	0.00064049	0.00679946	yes
Unigene0026117	152.5	309.5	3.36285	7.08195	1.07446	1.36366e-05	0.000218921	yes
Unigene0026119	44.5	15	0.6569	0.22895	-1.52064	0.00272584	0.0236416	yes
Unigene0026124	36	6.5	0.73425	0.12785	-2.52182	0.0050756	0.0400993	yes
Unigene0026134	509	212	9.90795	4.2572	-1.21868	1.29309e-09	3.9692e-08	yes
Unigene0026141	96	35	0.7171	0.27205	-1.3983	0.000246082	0.0029025	yes
Unigene0026142	427.5	110	4.2326	1.12475	-1.91194	3.68031e-15	2.08522e-13	yes
Unigene0026158	258.5	59	8.25625	1.9108	-2.11131	6.57719e-10	2.10566e-08	yes
Unigene0026163	33	75.5	0.7578	1.8097	1.25586	0.00126678	0.0122649	yes
Unigene0026184	1269	225	23.4287	4.28645	-2.45042	2.16544e-40	6.15354e-38	yes
Unigene0026192	2105	806.5	25.7431	10.2021	-1.33531	4.82163e-21	4.45245e-19	yes
Unigene0026199	59.5	0	1.34975	0.001	-10.3985	0.00017557	0.0021576	yes
Unigene0026214	14.5	0	1.2749	0.001	-10.3162	0.000242594	0.00286714	yes
Unigene0026216	59	1	1.53115	0.02495	-5.93943	1.7692e-11	6.89776e-10	yes
Unigene0026218	75.5	28	0.90475	0.3378	-1.42135	0.00360639	0.0300562	yes
Unigene0026243	1687.5	12980.5	19.5566	155.44	2.99063	6.10475e-120	1.60261e-116	yes
Unigene0026244	720	307.5	4.28585	1.90355	-1.17089	8.62698e-11	3.11458e-09	yes
Unigene0026246	1639.5	6348	15.4706	62.1746	2.00679	4.06584e-58	2.19751e-55	yes
Unigene0026249	28	1	0.5365	0.02115	-4.66485	1.43317e-05	0.000229078	yes
Unigene0026271	5384.5	1915	76.2381	28.0177	-1.44417	6.24382e-35	1.33936e-32	yes
Unigene0026285	38.5	9	1.1605	0.2873	-2.01412	0.00217548	0.0195361	yes
Unigene0026301	837	3289.5	11.9575	48.4974	2.01999	2.65326e-48	1.03739e-45	yes
Unigene0026306	51.5	9	0.6258	0.11135	-2.4906	2.96454e-05	0.000442785	yes
Unigene0026325	1913	891	21.7833	10.513	-1.05105	4.57e-15	2.57081e-13	yes
Unigene0026341	171	61.5	1.26195	0.46665	-1.43524	1.83955e-06	3.48977e-05	yes
Unigene0026347	44.5	10	0.55235	0.1349	-2.03369	0.00221136	0.0198002	yes
Unigene0026348	258	93.5	6.04435	2.27335	-1.41077	8.60452e-07	1.73187e-05	yes
Unigene0026365	109.5	43.5	1.87965	0.77485	-1.27848	0.000173762	0.00213872	yes
Unigene0026376	520	164	7.3783	2.43985	-1.5965	2.38839e-12	1.02387e-10	yes
Unigene0026380	577.5	227.5	3.47515	1.4242	-1.28692	6.98152e-11	2.54385e-09	yes
Unigene0026389	411	186.5	6.65545	3.17825	-1.0663	4.13737e-05	0.000598816	yes
Unigene0026390	76	31	1.50315	0.63475	-1.24373	0.00154073	0.0145643	yes
Unigene0026402	836	405	9.23385	4.61635	-1.00018	8.97275e-10	2.81696e-08	yes
Unigene0026405	217	90	4.15415	1.8138	-1.19554	7.24178e-05	0.000983815	yes
Unigene0026406	883	329.5	13.217	5.18835	-1.34905	6.95046e-10	2.21615e-08	yes
Unigene0026411	40	94.5	0.43375	1.05005	1.27552	0.000681549	0.00717318	yes
Unigene0026423	97.5	271.5	1.7098	4.9423	1.53136	6.49307e-10	2.07993e-08	yes
Unigene0026433	14904	37407	402.717	1042.08	1.37163	7.54245e-19	5.84821e-17	yes
Unigene0026440	4460.5	1666	74.471	28.7407	-1.37358	2.80448e-18	2.08087e-16	yes
Unigene0026469	114	34.5	1.29415	0.41045	-1.65673	1.53611e-05	0.000244257	yes
Unigene0026473	94	41	2.6426	1.19055	-1.15033	0.00225263	0.020115	yes
Unigene0026479	137	300	1.95065	4.3926	1.17112	0.000246837	0.00291015	yes
Unigene0026491	6461.5	2398.5	158.179	61.3787	-1.36575	0.00112106	0.0110526	yes
Unigene0026494	347	161.5	5.20965	2.52995	-1.04208	6.53612e-05	0.000898354	yes
Unigene0026525	246	65.5	2.84965	0.7837	-1.86241	1.49625e-10	5.23062e-09	yes
Unigene0026535	3080	8170	51.4612	141.59	1.46016	2.56062e-36	6.05856e-34	yes
Unigene0026551	20.5	526.5	0.38645	9.91845	4.68176	8.30027e-20	6.98604e-18	yes
Unigene0026553	271.5	120.5	3.4839	1.61325	-1.11073	1.48638e-05	0.000236829	yes
Unigene0026559	135.5	48.5	4.23555	1.5565	-1.44424	1.27329e-05	0.000205791	yes
Unigene0026560	102.5	32.5	1.91235	0.64325	-1.5719	0.000176785	0.00217156	yes
Unigene0026583	92.5	39.5	1.3885	0.61745	-1.16913	0.00122413	0.0119103	yes
Unigene0026606	229.5	37.5	2.76295	0.46585	-2.56827	2.38507e-17	1.65184e-15	yes
Unigene0026651	38	314	0.46595	4.0652	3.12508	4.78866e-19	3.76596e-17	yes
Unigene0026652	943	1939.5	13.031	27.7099	1.08845	2.74566e-16	1.73784e-14	yes
Unigene0026653	1123.5	315.5	12.0236	3.49385	-1.78297	1.92445e-22	1.9431e-20	yes
Unigene0026656	6.5	24.5	0.24035	0.93195	1.95512	0.00631428	0.0479873	yes
Unigene0026662	275	96.5	3.5619	1.27595	-1.48108	1.26711e-06	2.4815e-05	yes
Unigene0026664	29.5	2	0.771	0.05045	-3.9338	2.96954e-05	0.00044325	yes
Unigene0026672	55.5	14.5	1.22635	0.3395	-1.85289	0.00156959	0.0148016	yes
Unigene0026679	40	175.5	1.01145	4.5284	2.16258	1.59085e-07	3.61808e-06	yes
Unigene0026683	622.5	273	10.8781	4.95035	-1.13583	1.25508e-09	3.85681e-08	yes
Unigene0026697	580	228.5	5.6584	2.334	-1.27759	7.03873e-09	1.97374e-07	yes
Unigene0026708	45.5	14	0.83585	0.2692	-1.63457	0.00240826	0.0212526	yes
Unigene0026714	1132.5	2308.5	11.777	24.8713	1.07851	7.77869e-15	4.28403e-13	yes
Unigene0026720	492.5	215.5	4.76625	2.1253	-1.16519	8.84587e-06	0.000147687	yes
Unigene0026722	639	102	6.51915	1.09125	-2.5787	6.04671e-27	8.23084e-25	yes
Unigene0026745	398	141	2.77605	1.0257	-1.43642	2.34567e-10	7.95782e-09	yes
Unigene0026762	3043.5	945	26.9489	8.6425	-1.64071	3.22456e-28	4.89716e-26	yes
Unigene0026766	161	26	2.97295	0.50215	-2.5657	5.38189e-13	2.47661e-11	yes
Unigene0026798	1145.5	4470	21.8469	88.9999	2.02637	4.71366e-38	1.2143e-35	yes
Unigene0026804	288	38	4.9923	0.67715	-2.88216	1.06406e-22	1.10264e-20	yes
Unigene0026805	21	0	0.41555	0.001	-8.69888	5.3153e-05	0.000747137	yes
Unigene0026810	272.5	112	2.60555	1.1213	-1.21642	2.95463e-06	5.4097e-05	yes
Unigene0026811	1826	841	35.7952	17.1653	-1.06027	6.14953e-15	3.42788e-13	yes
Unigene0026816	359	122.5	7.5076	2.6805	-1.48585	9.90384e-10	3.09167e-08	yes
Unigene0026817	17675.5	6147	427.151	154.712	-1.46516	1.72931e-06	3.29494e-05	yes
Unigene0026829	446.5	166.5	4.3281	1.68465	-1.36128	4.53094e-08	1.13026e-06	yes
Unigene0026840	96.5	41	1.26675	0.56675	-1.16035	0.00242645	0.0213925	yes
Unigene0026842	284.5	79	4.9647	1.4611	-1.76465	1.29382e-07	2.99442e-06	yes
Unigene0026856	360.5	756	6.2613	13.519	1.11045	4.8525e-10	1.57546e-08	yes
Unigene0026859	418.5	107	3.27455	0.8797	-1.89621	3.14395e-13	1.48647e-11	yes
Unigene0026868	77	21.5	0.86615	0.2534	-1.7732	0.000142325	0.00179275	yes
Unigene0026889	91	39	0.8712	0.38545	-1.17646	0.00168059	0.0156742	yes
Unigene0026919	8378.5	3318.5	42.4237	17.4452	-1.28204	1.58127e-36	3.77376e-34	yes
Unigene0026939	420	182.5	5.00775	2.26275	-1.14609	3.38119e-08	8.62172e-07	yes
Unigene0026950	1496.5	172	9.084	1.08495	-3.0657	6.81694e-79	7.22714e-76	yes
Unigene0026956	3334.5	1105	45.3889	15.8001	-1.52241	2.91529e-20	2.57147e-18	yes
Unigene0026979	109	51.5	1.31315	0.6416	-1.03329	0.00197017	0.0179764	yes
Unigene0026981	105	342.5	2.48745	8.27225	1.73361	1.70231e-08	4.54903e-07	yes
Unigene0026986	10269	4099	160.418	66.5387	-1.26957	2.629e-20	2.33765e-18	yes
Unigene0027001	1571	5567	30.7021	111.206	1.85682	1.53956e-28	2.39758e-26	yes
Unigene0027002	27	102.5	0.33175	1.26895	1.93547	5.94894e-05	0.000827761	yes
Unigene0027028	3063.5	910.5	57.8404	17.766	-1.70296	3.88277e-39	1.05967e-36	yes
Unigene0027032	4269	1921.5	36.8569	17.214	-1.09835	2.08978e-23	2.25455e-21	yes
Unigene0027081	738.5	276	11.3985	4.4357	-1.36161	3.14019e-14	1.63625e-12	yes
Unigene0027082	33	138.5	0.53845	2.36605	2.1356	3.65263e-09	1.06374e-07	yes
Unigene0027088	64	0	1.33335	0.001	-10.3808	0.000149909	0.0018774	yes
Unigene0027103	42.5	10	1.0152	0.2485	-2.03045	0.000491978	0.00536968	yes
Unigene0027112	382	130.5	5.1366	1.85285	-1.47107	3.08097e-07	6.6844e-06	yes
Unigene0027121	393.5	181.5	8.09475	3.8493	-1.07239	6.9907e-07	1.4279e-05	yes
Unigene0027123	77	163.5	1.5006	3.26565	1.12183	0.00120487	0.011748	yes
Unigene0027125	87	25	1.3963	0.4217	-1.72732	9.58053e-05	0.00125697	yes
Unigene0027128	6226	873.5	41.9195	6.11445	-2.77733	1.58006e-121	4.35534e-118	yes
Unigene0027142	68166.5	150320	683.224	1559.52	1.19067	1.22376e-38	3.25917e-36	yes
Unigene0027144	899.5	1864	24.0473	51.2022	1.09033	1.66387e-06	3.18167e-05	yes
Unigene0027153	162	61.5	2.34085	0.9341	-1.32538	0.000250384	0.00294694	yes
Unigene0027175	4	69.5	0.1013	1.9027	4.23134	6.44362e-09	1.81425e-07	yes
Unigene0027177	366.5	1331	5.84285	21.8162	1.90066	2.00571e-28	3.06295e-26	yes
Unigene0027179	68	28	1.01045	0.42825	-1.23847	0.00312085	0.0265704	yes
Unigene0027180	1173.5	3011.5	8.97675	23.7692	1.40483	1.58535e-28	2.46194e-26	yes
Unigene0027183	80	31	1.1428	0.46495	-1.29743	0.00118609	0.0115997	yes
Unigene0027187	1231.5	3714.5	15.5345	48.2251	1.6343	1.39586e-33	2.80849e-31	yes
Unigene0027188	152	30	1.1954	0.2459	-2.28135	9.741e-11	3.49389e-09	yes
Unigene0027215	706.5	224	6.03065	1.98515	-1.60307	1.88384e-18	1.42266e-16	yes
Unigene0027216	159.5	72	2.2394	1.03535	-1.11299	0.000754766	0.00785826	yes
Unigene0027222	46	477	0.34175	3.64225	3.41382	3.5671e-28	5.37297e-26	yes
Unigene0027228	1568.5	736	16.3522	8.00075	-1.03128	8.53328e-12	3.4355e-10	yes
Unigene0027254	163.5	64.5	1.41055	0.5744	-1.29613	1.56374e-05	0.000247936	yes
Unigene0027258	12426.5	5063	138.422	58.3708	-1.24575	6.63987e-39	1.79436e-36	yes
Unigene0027270	1563	744.5	13.7442	6.8128	-1.01251	3.34931e-13	1.58221e-11	yes
Unigene0027279	608.5	1226	6.22615	13.0275	1.06515	5.23574e-14	2.67013e-12	yes
Unigene0027280	44.5	12.5	0.8321	0.2421	-1.78115	0.000744804	0.00777069	yes
Unigene0027291	101	36.5	2.69945	1.0166	-1.40891	0.000138522	0.00174911	yes
Unigene0027319	5468	12812.5	67.6882	163.662	1.27375	1.00326e-35	2.28549e-33	yes
Unigene0027323	45.5	5	0.6516	0.07435	-3.13158	0.000330475	0.0037681	yes
Unigene0027374	507	155.5	3.8386	1.23375	-1.63753	1.279e-10	4.49681e-09	yes
Unigene0027377	220.5	13	1.7177	0.1018	-4.07667	8.64185e-23	9.02304e-21	yes
Unigene0027382	987.5	281	9.6849	2.8724	-1.75348	5.26129e-25	6.31917e-23	yes
Unigene0027388	20242	6308	123.284	39.5172	-1.64144	5.93257e-46	2.22488e-43	yes
Unigene0027405	269.5	103.5	3.18545	1.2637	-1.33384	1.26784e-07	2.93798e-06	yes
Unigene0027418	187	61.5	4.97935	1.72125	-1.5325	2.70206e-06	4.98034e-05	yes
Unigene0027454	5	56.5	0.1086	1.20305	3.4696	8.19652e-05	0.00109703	yes
Unigene0027460	67.5	28	1.3477	0.58385	-1.20683	0.00469221	0.0375547	yes
Unigene0027470	212	92	3.8241	1.7261	-1.1476	1.6827e-05	0.000264817	yes
Unigene0027491	63	14.5	0.7406	0.17285	-2.09917	4.82032e-05	0.000685779	yes
Unigene0027503	59.5	20.5	0.6151	0.21975	-1.48496	0.00112107	0.0110526	yes
Unigene0027507	36.5	1.5	0.2437	0.0107	-4.50942	1.6919e-07	3.82737e-06	yes
Unigene0027513	87000	259164	1259.01	3892.15	1.62828	1.40737e-72	1.21229e-69	yes
Unigene0027533	610.5	205.5	4.20085	1.46385	-1.52091	1.63315e-13	7.94171e-12	yes
Unigene0027535	763.5	289	9.62065	3.79115	-1.3435	6.3403e-14	3.19794e-12	yes
Unigene0027551	85.5	261.5	1.11615	3.5372	1.66408	9.53896e-10	2.98622e-08	yes
Unigene0027552	15.5	52.5	0.255	0.8913	1.80541	0.00126485	0.0122505	yes
Unigene0027553	7.5	114.5	0.17855	2.79215	3.96698	3.96738e-14	2.04409e-12	yes
Unigene0027556	97	545.5	1.27525	7.1802	2.49324	3.81959e-09	1.10943e-07	yes
Unigene0027562	22	82	0.25735	1.00535	1.96589	4.08748e-05	0.000592685	yes
Unigene0027566	347.5	70.5	2.8456	0.60385	-2.23647	1.05043e-17	7.49146e-16	yes
Unigene0027568	269	855.5	2.20985	7.23845	1.71173	3.30152e-21	3.07449e-19	yes
Unigene0027580	85	16	1.4015	0.27845	-2.33148	1.12154e-06	2.21532e-05	yes
Unigene0027583	92	24.5	0.9158	0.2601	-1.81597	7.03273e-05	0.000959434	yes
Unigene0027585	275	66	7.9723	1.99125	-2.00132	3.25322e-09	9.53466e-08	yes
Unigene0027593	78.5	26	0.7401	0.25685	-1.52679	0.000308301	0.00353983	yes
Unigene0027594	638.5	155.5	10.356	2.5998	-1.99399	3.95202e-23	4.18178e-21	yes
Unigene0027599	145.5	822.5	2.18295	12.7034	2.54086	2.00897e-25	2.49442e-23	yes
Unigene0027601	329	135.5	2.38405	1.0168	-1.22938	1.01535e-07	2.39313e-06	yes
Unigene0027602	404	50	9.53935	1.22755	-2.95811	2.54074e-30	4.33648e-28	yes
Unigene0027621	150.5	321	1.35625	2.9641	1.12797	1.13956e-05	0.000186252	yes
Unigene0027622	59	303	0.8102	4.35495	2.42631	1.07149e-17	7.62195e-16	yes
Unigene0027633	157.5	35	2.36465	0.5598	-2.07864	6.54368e-07	1.34351e-05	yes
Unigene0027636	449	18	2.6891	0.1099	-4.61286	3.38623e-16	2.12136e-14	yes
Unigene0027655	294.5	106.5	2.9707	1.10795	-1.42291	5.16161e-06	9.04497e-05	yes
Unigene0027656	1442	152	17.0868	1.85435	-3.2039	1.35591e-71	1.10922e-68	yes
Unigene0027661	748	354	8.73175	4.34565	-1.0067	2.54095e-06	4.707e-05	yes
Unigene0027684	112.5	32	1.2796	0.3768	-1.76382	3.7399e-05	0.000546453	yes
Unigene0027696	1568.5	17887	18.037	212.364	3.55751	8.20512e-222	4.5234e-217	yes
Unigene0027702	28.5	146.5	0.64775	3.4549	2.41513	3.26595e-12	1.38074e-10	yes
Unigene0027714	72	23.5	1.48285	0.5135	-1.52994	0.00109673	0.010849	yes
Unigene0027722	91	8.5	1.22655	0.124	-3.30619	3.85054e-05	0.000560836	yes
Unigene0027727	61.5	5	0.9872	0.085	-3.53781	1.70716e-09	5.17395e-08	yes
Unigene0027731	267	72	3.83455	1.0438	-1.87721	6.19813e-06	0.00010668	yes
Unigene0027748	261	61.5	4.0287	0.98895	-2.02634	1.2983e-13	6.38481e-12	yes
Unigene0027759	22.5	96.5	0.34175	1.47655	2.11122	8.0904e-05	0.00108388	yes
Unigene0027760	383.5	174	8.4794	3.99795	-1.0847	5.76772e-07	1.19627e-05	yes
Unigene0027767	51	14.5	1.01315	0.3041	-1.73623	0.00108229	0.0107356	yes
Unigene0027771	196.5	90	1.99455	0.9527	-1.06597	0.000154314	0.00192427	yes
Unigene0027790	28	3.5	0.7536	0.0988	-2.93122	0.00301407	0.0257817	yes
Unigene0027795	180	35	1.36045	0.2825	-2.26776	2.94216e-08	7.59e-07	yes
Unigene0027811	299.5	123	7.826	3.34935	-1.22439	1.09837e-06	2.17657e-05	yes
Unigene0027818	299.5	86.5	4.35875	1.3045	-1.74042	1.25593e-10	4.42417e-09	yes
Unigene0027827	121	55.5	1.0581	0.5034	-1.0717	0.000772468	0.00800779	yes
Unigene0027833	19	1574.5	0.46085	40.1339	6.44438	8.7807e-148	6.05089e-144	yes
Unigene0027835	6.5	32	0.1505	0.7625	2.34097	0.000469347	0.00514304	yes
Unigene0027838	157	59	1.42335	0.5557	-1.35691	8.21874e-05	0.00109893	yes
Unigene0027840	12	41	0.42285	1.53315	1.85828	0.00220921	0.0197874	yes
Unigene0027841	24.5	75	0.68625	2.25735	1.71782	0.00302679	0.0258664	yes
Unigene0027856	72	11	1.446	0.23215	-2.63894	8.84205e-08	2.09928e-06	yes
Unigene0027860	13	0	0.2714	0.001	-8.08428	0.0006238	0.00664275	yes
Unigene0027901	379	177.5	4.9762	2.42665	-1.03608	2.6958e-06	4.97045e-05	yes
Unigene0027902	76	31	1.046	0.44055	-1.24751	0.00163048	0.0152738	yes
Unigene0027906	1075	424.5	6.5667	2.67515	-1.29555	2.51155e-16	1.59884e-14	yes
Unigene0027912	22.5	146	0.95045	6.4518	2.76302	1.66346e-12	7.29551e-11	yes
Unigene0027913	394	144.5	5.3882	2.0898	-1.36644	4.88739e-06	8.59722e-05	yes
Unigene0027926	318.5	111.5	8.94565	3.23925	-1.46553	7.38755e-10	2.35008e-08	yes
Unigene0027942	362	47	4.61885	0.6228	-2.89069	1.29693e-26	1.7312e-24	yes
Unigene0027950	60	350	0.63405	3.8693	2.6094	5.53033e-21	5.09836e-19	yes
Unigene0027958	771.5	271.5	3.61905	1.3393	-1.43413	5.92919e-11	2.17623e-09	yes
Unigene0027966	219.5	67	3.56395	1.1505	-1.63122	8.58418e-07	1.72904e-05	yes
Unigene0027980	324	105	4.68155	1.5777	-1.56916	2.37728e-10	8.05931e-09	yes
Unigene0027985	1171	394	9.534	3.31075	-1.52592	7.51515e-23	7.86153e-21	yes
Unigene0027988	1015.5	163.5	11.4805	1.9315	-2.5714	1.1762e-41	3.6225e-39	yes
Unigene0027998	86.5	12.5	1.0078	0.1556	-2.6953	2.52654e-07	5.55145e-06	yes
Unigene0028004	175.5	48.5	2.98195	0.85755	-1.79796	3.85754e-09	1.11869e-07	yes
Unigene0028021	38.5	12.5	0.6776	0.22495	-1.59083	0.00491817	0.0390627	yes
Unigene0028023	276	96.5	2.23325	0.80935	-1.46431	6.82662e-09	1.91719e-07	yes
Unigene0028025	61	17	0.7736	0.2295	-1.75309	0.000433441	0.00478573	yes
Unigene0028033	54	0	0.77335	0.001	-9.59498	7.19784e-10	2.29105e-08	yes
Unigene0028034	28.5	0	0.58095	0.001	-9.18227	7.81904e-06	0.000131862	yes
Unigene0028048	52.5	17	0.54165	0.18575	-1.544	0.00248467	0.0218221	yes
Unigene0028081	57	308	0.6559	3.66525	2.48236	5.4709e-12	2.24242e-10	yes
Unigene0028087	408	114	5.5965	1.6234	-1.78551	2.03184e-12	8.82688e-11	yes
Unigene0028105	300	1077	2.0024	7.38415	1.8827	8.74717e-25	1.03704e-22	yes
Unigene0028127	268	100	2.6384	1.0333	-1.3524	7.77695e-07	1.57565e-05	yes
Unigene0028131	407.5	177.5	3.6668	1.65805	-1.14503	4.08927e-08	1.03081e-06	yes
Unigene0028144	184	41	1.2357	0.28915	-2.09544	3.86852e-10	1.27248e-08	yes
Unigene0028152	227	89	3.84945	1.56345	-1.29992	1.7561e-06	3.34086e-05	yes
Unigene0028163	68.5	9.5	0.6205	0.0924	-2.74747	9.83669e-07	1.96196e-05	yes
Unigene0028164	6671.5	14188.5	39.9365	88.0802	1.14111	4.31304e-35	9.39817e-33	yes
Unigene0028171	48	4	0.29035	0.02625	-3.4674	1.00402e-06	1.99822e-05	yes
Unigene0028180	16	58.5	0.18525	0.7149	1.94827	0.00281015	0.0242619	yes
Unigene0028190	650	1455	5.57345	12.9004	1.21077	6.05313e-16	3.69549e-14	yes
Unigene0028202	2	27	0.0823	1.16255	3.82026	1.80645e-05	0.00028276	yes
Unigene0028216	203	94	3.1863	1.52715	-1.06104	5.99643e-05	0.000833738	yes
Unigene0028218	1539.5	374.5	23.7179	6.08145	-1.96349	1.38161e-17	9.73998e-16	yes
Unigene0028227	22	1.5	1.05405	0.07655	-3.7834	0.000124166	0.0015871	yes
Unigene0028259	43.5	3	0.9582	0.0667	-3.84457	8.24914e-07	1.66459e-05	yes
Unigene0028292	869.5	209	8.5834	2.18225	-1.97573	8.51379e-15	4.67487e-13	yes
Unigene0028307	19	68.5	0.34685	1.302	1.90835	1.40978e-05	0.000225798	yes
Unigene0028327	20.5	1	0.26895	0.01475	-4.18855	0.000249938	0.00294231	yes
Unigene0028331	126	47.5	0.853	0.3363	-1.3428	0.000149569	0.00187357	yes
Unigene0028350	95.5	22	1.25025	0.3013	-2.05294	3.30528e-06	5.98806e-05	yes
Unigene0028358	689.5	76	8.88505	0.99445	-3.15941	1.46412e-28	2.29306e-26	yes
Unigene0028371	172.5	68.5	2.18515	0.9122	-1.26031	7.25249e-05	0.000985028	yes
Unigene0028377	245.5	55	4.3371	1.02325	-2.08357	3.45382e-11	1.30147e-09	yes
Unigene0028382	455.5	176.5	3.47615	1.41035	-1.30144	1.2364e-08	3.37433e-07	yes
Unigene0028388	773.5	1834	10.4142	25.5998	1.29758	1.96897e-14	1.03972e-12	yes
Unigene0028399	31	9	0.5506	0.1633	-1.75348	0.00593261	0.0455387	yes
Unigene0028420	1979.5	884.5	22.8998	10.6743	-1.10119	1.46232e-12	6.45963e-11	yes
Unigene0028434	262.5	70	3.6842	1.01375	-1.86165	1.18596e-11	4.71042e-10	yes
Unigene0028435	6429.5	2054.5	34.2043	11.3865	-1.58686	1.32784e-44	4.88016e-42	yes
Unigene0028437	38	106.5	0.5857	1.6909	1.52956	0.00281615	0.0243036	yes
[truncated: 1,415 more rows]
