# Supplementary material for: Identification of Candidate Genes Associated with Pulp Color by Transcriptomic Analysis of ‘Huaxiu’ Plum (Prunus salicina Lindl.) during Fruit-Ripening
Source: Curr Issues Mol Biol. 2022 Dec 15;44(12):6368–84. doi: 10.3390/cimb44120434 (PMC9776821; doi:10.3390/cimb44120434)
Supplement: Supplementary file 1 [file cimb-44-00434-s001.zip › Table S11.xlsx]

## Sheet: Table S10
GeneID	YS_count	RS_count	YS_rpkm	RS_rpkm	log2 Ratio(RS/YS)	Pvalue	FDR	significant
Unigene0000009	131.5	295.5	5.60535	12.576	1.16579	1.95689e-07	2.74377e-06	yes
Unigene0000012	739	226	22.9911	7.03145	-1.70918	6.86444e-17	2.44957e-15	yes
Unigene0000017	0	15.5	0.001	0.9047	9.8213	9.12123e-05	0.000826557	yes
Unigene0000028	42.5	2.5	2.3926	0.14795	-4.0154	5.11927e-09	8.81153e-08	yes
Unigene0000030	75	19	0.952	0.2494	-1.9325	0.000158445	0.00137205	yes
Unigene0000031	24.5	2.5	0.2408	0.0251	-3.26208	7.19533e-05	0.000667433	yes
Unigene0000032	3597	1163	33.8257	11.0195	-1.61807	3.14845e-39	4.10261e-37	yes
Unigene0000047	963	370	5.4048	2.1017	-1.36268	2.55527e-17	9.36325e-16	yes
Unigene0000051	213.5	471.5	2.292	5.0749	1.14677	5.08823e-11	1.08901e-09	yes
Unigene0000065	240	81	6.13385	2.1065	-1.54194	3.95127e-08	6.08037e-07	yes
Unigene0000090	81.5	7	1.8763	0.16415	-3.5148	1.82149e-12	4.47972e-11	yes
Unigene0000095	41.5	12.5	0.69785	0.2036	-1.77718	0.00853543	0.0478114	yes
Unigene0000097	18.5	54.5	0.7501	2.26385	1.59362	0.000940565	0.0068847	yes
Unigene0000098	15	994	0.27225	17.3545	5.99423	6.80813e-22	3.47069e-20	yes
Unigene0000099	145	68	1.21635	0.5748	-1.08143	0.000325075	0.00265219	yes
Unigene0000112	18	2.5	1.67655	0.2514	-2.73744	0.00535267	0.0320268	yes
Unigene0000114	415	2145	4.64445	23.7873	2.35661	4.4645e-35	4.81725e-33	yes
Unigene0000115	333	1411.5	9.1891	38.5883	2.07017	2.99965e-24	1.77245e-22	yes
Unigene0000131	3442	20191	42.2407	249.27	2.561	1.03027e-151	2.00896e-148	yes
Unigene0000148	3724	1546	37.0765	15.4109	-1.26656	1.76814e-23	9.90123e-22	yes
Unigene0000160	20.5	4.5	1.09575	0.2483	-2.14176	0.00561827	0.0334365	yes
Unigene0000161	0	13.5	0.001	0.5737	9.16415	0.000214684	0.0018122	yes
Unigene0000180	127	56	0.9554	0.4266	-1.16322	0.000428059	0.00339845	yes
Unigene0000182	76	1	0.7519	0.00925	-6.34494	4.2992e-11	9.29983e-10	yes
Unigene0000185	51	7	0.90735	0.1332	-2.76807	8.63067e-05	0.000786279	yes
Unigene0000186	60	12	2.2845	0.47175	-2.27578	3.59279e-06	4.18161e-05	yes
Unigene0000190	26	3.5	0.5111	0.0673	-2.92493	0.000359431	0.00290213	yes
Unigene0000197	5.5	22.5	0.3588	1.45025	2.01505	0.00740057	0.0423273	yes
Unigene0000201	433	197.5	4.57035	2.0993	-1.1224	9.84743e-09	1.64018e-07	yes
Unigene0000202	166	64	1.99035	0.7584	-1.39199	4.55651e-06	5.21981e-05	yes
Unigene0000204	79.5	19	1.93675	0.45865	-2.07817	1.5344e-07	2.1862e-06	yes
Unigene0000209	313.5	152	2.40595	1.18105	-1.02654	2.93787e-06	3.4689e-05	yes
Unigene0000222	351	132	17.8865	6.8479	-1.38514	6.37798e-09	1.0865e-07	yes
Unigene0000234	11.5	102	0.24075	2.12645	3.14284	9.68583e-10	1.8061e-08	yes
Unigene0000238	78.5	546	0.775	5.3991	2.80045	5.86922e-41	8.13319e-39	yes
Unigene0000240	372.5	122.5	6.35435	2.10975	-1.59067	4.10019e-15	1.27848e-13	yes
Unigene0000241	76	25.5	2.0326	0.68185	-1.5758	1.69963e-05	0.000177296	yes
Unigene0000245	19.5	1	0.47545	0.0246	-4.27256	7.48677e-05	0.000691178	yes
Unigene0000253	67.5	31	2.8431	1.338	-1.08739	0.00850809	0.0476778	yes
Unigene0000260	20.5	5	1.2849	0.30735	-2.0637	0.00810741	0.0457754	yes
Unigene0000265	57	18	1.97255	0.61825	-1.6738	0.000916951	0.00673826	yes
Unigene0000273	17	43.5	0.4816	1.229	1.35158	0.00318782	0.0204739	yes
Unigene0000278	53.5	12	1.19295	0.26695	-2.15989	2.85286e-06	3.37436e-05	yes
Unigene0000285	5	29.5	0.1233	0.73735	2.58018	0.000195946	0.00167003	yes
Unigene0000291	153.5	58	1.861	0.70135	-1.40787	5.99958e-05	0.000565645	yes
Unigene0000293	380	1154	10.2661	31.0926	1.59868	8.06038e-23	4.3315e-21	yes
Unigene0000300	4	26.5	0.0582	0.397	2.77005	0.000418231	0.00332722	yes
Unigene0000305	3247.5	1454.5	17.118	7.739	-1.1453	2.69101e-21	1.30831e-19	yes
Unigene0000311	86.5	24	2.8279	0.7711	-1.87474	3.19235e-06	3.75315e-05	yes
Unigene0000312	69	1934	0.5474	15.3977	4.81398	4.74514e-166	1.36355e-162	yes
Unigene0000320	172	66	5.3791	2.099	-1.35766	1.12395e-06	1.41984e-05	yes
Unigene0000340	55072	173116	423.158	1352.18	1.67602	7.69103e-23	4.14117e-21	yes
Unigene0000348	956	467.5	10.0561	4.98125	-1.01349	1.8639e-10	3.77047e-09	yes
Unigene0000360	133	17	1.89045	0.2387	-2.98546	1.73313e-13	4.71948e-12	yes
Unigene0000361	94.5	43	3.21215	1.49265	-1.10566	0.00199102	0.0134854	yes
Unigene0000380	15.5	51	0.67975	2.305	1.76169	0.00659006	0.0383873	yes
Unigene0000384	366.5	89	12.6546	3.0902	-2.03389	3.12036e-16	1.05751e-14	yes
Unigene0000388	29.5	3.5	0.89485	0.11035	-3.01956	2.51551e-05	0.000254666	yes
Unigene0000393	139.5	63.5	1.9166	0.86475	-1.14819	0.0001186	0.00105033	yes
Unigene0000408	43.5	8	0.44205	0.0806	-2.45536	6.08588e-06	6.84119e-05	yes
Unigene0000417	31	8.5	0.67925	0.18715	-1.85975	0.00136767	0.00963014	yes
Unigene0000432	18	2	0.4701	0.049	-3.26211	0.00333596	0.0212926	yes
Unigene0000433	1299.5	319.5	13.19	3.2263	-2.0315	1.03413e-34	1.0921e-32	yes
Unigene0000460	5493	2591	38.2193	18.0694	-1.08076	4.60482e-15	1.43174e-13	yes
Unigene0000470	1400.5	3113.5	10.4817	23.2749	1.1509	2.10863e-19	9.01545e-18	yes
Unigene0000503	70.5	24	0.51785	0.178	-1.54066	3.7879e-05	0.000370298	yes
Unigene0000505	83.5	4.5	1.26025	0.07115	-4.1467	1.04998e-15	3.41433e-14	yes
Unigene0000533	453.5	990.5	3.121	6.8477	1.13361	9.15667e-16	2.99542e-14	yes
Unigene0000536	176216	379584	2202.26	4753.96	1.11014	2.33346e-31	2.01268e-29	yes
Unigene0000544	36.5	73	2.13505	4.28775	1.00595	0.00387814	0.0242764	yes
Unigene0000550	31	6.5	0.83035	0.1783	-2.21941	0.00169409	0.0116711	yes
Unigene0000552	82.5	7	0.69725	0.05905	-3.56167	8.15527e-12	1.8867e-10	yes
Unigene0000553	81	186	1.286	2.9323	1.18914	8.40149e-05	0.000767583	yes
Unigene0000555	85	15.5	0.75495	0.13495	-2.48396	1.27852e-08	2.09184e-07	yes
Unigene0000583	9	70	0.13385	1.06	2.98538	6.33262e-09	1.07912e-07	yes
Unigene0000584	106.5	23.5	0.6081	0.1348	-2.17349	6.79051e-10	1.29136e-08	yes
Unigene0000588	141	1260	1.96415	17.4	3.14711	5.99268e-47	1.087e-44	yes
Unigene0000600	1834.5	679.5	20.4891	7.6553	-1.42033	6.94947e-27	4.76069e-25	yes
Unigene0000601	1073.5	47	11.9366	0.52255	-4.51368	1.14208e-86	7.0858e-84	yes
Unigene0000605	37.5	6	0.5456	0.09115	-2.58153	3.38646e-05	0.000333865	yes
Unigene0000611	1098	2283.5	9.48905	19.845	1.06444	6.91564e-20	3.07977e-18	yes
Unigene0000615	11610	4174.5	92.4453	33.5721	-1.46134	8.94423e-41	1.22084e-38	yes
Unigene0000616	177	50.5	5.1231	1.4972	-1.77475	4.95911e-08	7.55883e-07	yes
Unigene0000617	82	27	1.28155	0.4218	-1.60326	3.01101e-05	0.000299227	yes
Unigene0000631	153	73.5	0.7751	0.3726	-1.05675	0.00014257	0.00124445	yes
Unigene0000633	0	8	0.001	0.772	9.59246	0.00835838	0.04702	yes
Unigene0000634	12	67	0.2088	1.15325	2.46551	2.60616e-07	3.5932e-06	yes
Unigene0000638	3.5	52.5	0.09815	1.3841	3.81782	0.00232011	0.0154423	yes
Unigene0000642	0	15	0.001	1.65475	10.6924	0.0069001	0.0399249	yes
Unigene0000670	302.5	776	5.14815	13.2758	1.36667	3.76563e-19	1.58639e-17	yes
Unigene0000682	192	84	1.35865	0.59025	-1.20278	1.74918e-05	0.000181977	yes
Unigene0000684	93	10	1.2377	0.13435	-3.20359	6.62314e-14	1.87072e-12	yes
Unigene0000692	29	9	0.4184	0.13115	-1.67367	0.00506267	0.0305596	yes
Unigene0000712	310	99	10.2745	3.27515	-1.64944	1.30457e-13	3.59006e-12	yes
Unigene0000748	30.5	9	0.92055	0.2722	-1.75783	0.00298824	0.0193331	yes
Unigene0000754	1362.5	4910.5	15.705	57.0849	1.86189	1.52825e-42	2.26738e-40	yes
Unigene0000764	8867.5	23142	38.089	99.5906	1.38664	1.42699e-48	2.77263e-46	yes
Unigene0000770	6	32.5	0.13675	0.75285	2.46082	0.000683824	0.00518331	yes
Unigene0000774	57.5	154	0.643	1.72505	1.42375	2.14519e-07	2.99317e-06	yes
Unigene0000775	12	40.5	0.46635	1.6135	1.79071	0.00151462	0.0105532	yes
Unigene0000787	6	55.5	0.1185	1.1124	3.23072	2.26074e-05	0.000230541	yes
Unigene0000789	138	9	1.5582	0.0971	-4.00427	1.77053e-14	5.22245e-13	yes
Unigene0000790	1280.5	366.5	10.6832	3.0872	-1.79098	2.60743e-35	2.84721e-33	yes
Unigene0000797	90	17.5	3.2412	0.64445	-2.33039	1.82637e-07	2.57465e-06	yes
Unigene0000806	0	33.5	0.001	0.77005	9.58881	2.31771e-07	3.21991e-06	yes
Unigene0000807	76.5	23.5	0.65495	0.20335	-1.68742	4.41655e-06	5.06905e-05	yes
Unigene0000826	68	137.5	0.8332	1.69065	1.02084	0.000257278	0.00213901	yes
Unigene0000830	15.5	1.5	0.8059	0.0732	-3.46069	0.00287558	0.0187022	yes
Unigene0000834	206	14	4.64265	0.31215	-3.89464	3.26813e-31	2.78367e-29	yes
Unigene0000835	120	6	4.596	0.21565	-4.41362	1.53231e-13	4.19353e-12	yes
Unigene0000836	325	65	7.4051	1.4802	-2.32273	1.87421e-23	1.0463e-21	yes
Unigene0000841	840	316	8.41335	3.20445	-1.3926	5.85311e-11	1.24297e-09	yes
Unigene0000853	467	219	8.15845	3.8908	-1.06823	5.85044e-07	7.68027e-06	yes
Unigene0000857	18.5	0.5	1.23915	0.0314	-5.30244	0.000425262	0.0033787	yes
Unigene0000858	49	2	2.79345	0.11485	-4.60423	2.33451e-07	3.24242e-06	yes
Unigene0000886	24	6	0.55285	0.14285	-1.95239	0.00699067	0.0403647	yes
Unigene0000887	47	434	0.65105	6.05385	3.21701	2.17865e-43	3.34129e-41	yes
Unigene0000903	247.5	91.5	2.6904	0.99715	-1.43194	9.87713e-10	1.83926e-08	yes
Unigene0000904	13	0	0.6179	0.001	-9.27123	0.000254947	0.00212189	yes
Unigene0000905	39.5	1.5	1.34305	0.04785	-4.81085	1.83942e-07	2.5917e-06	yes
Unigene0000910	26	6.5	0.7291	0.18685	-1.96424	0.00298616	0.0193251	yes
Unigene0000917	124	54	1.98935	0.85935	-1.21098	0.000699986	0.0052904	yes
Unigene0000918	474.5	232.5	12.993	6.4419	-1.01217	4.84892e-07	6.43045e-06	yes
Unigene0000926	9	0	0.7485	0.001	-9.54786	0.00364363	0.0230047	yes
Unigene0000929	384	80	3.43555	0.7227	-2.24907	9.25434e-20	4.08463e-18	yes
Unigene0000934	0.5	11.5	0.0219	0.50845	4.5371	0.00288188	0.0187382	yes
Unigene0000936	103.5	45.5	1.88535	0.8356	-1.17395	0.000170715	0.00146875	yes
Unigene0000948	50	16	0.8607	0.2753	-1.64451	0.000718998	0.00541609	yes
Unigene0000952	2746.5	9961	13.2627	47.9692	1.85474	3.96208e-56	1.04001e-53	yes
Unigene0000972	326.5	82	2.6889	0.67785	-1.98798	1.32362e-17	4.96339e-16	yes
Unigene0000984	16	1.5	0.74115	0.0751	-3.30288	0.00279145	0.0182088	yes
Unigene0000991	182.5	62.5	15.5033	5.27395	-1.55562	2.34982e-06	2.81658e-05	yes
Unigene0000992	2395.5	1119	9.57585	4.48835	-1.09322	7.74097e-22	3.9279e-20	yes
Unigene0000995	199.5	84.5	7.8509	3.32675	-1.23874	3.32384e-07	4.51094e-06	yes
Unigene0000996	619.5	243	10.4309	4.101	-1.34682	2.75544e-10	5.45474e-09	yes
Unigene0000998	537.5	241.5	17.3624	7.8685	-1.14181	2.68743e-08	4.22483e-07	yes
Unigene0001000	13	46	0.16535	0.5932	1.843	0.000144691	0.00126135	yes
Unigene0001017	94	19	1.70365	0.3477	-2.29271	1.10308e-09	2.04573e-08	yes
Unigene0001024	30	116.5	0.25015	0.96675	1.95035	1.8892e-08	3.02128e-07	yes
Unigene0001027	1469.5	17.5	12.9346	0.16185	-6.32043	1.46087e-79	7.81968e-77	yes
Unigene0001028	611	238.5	5.43295	2.15205	-1.33602	3.66858e-11	8.02322e-10	yes
Unigene0001030	0	8.5	0.001	0.667	9.38154	0.00689435	0.0399043	yes
Unigene0001031	3.5	19	0.17025	0.92545	2.4425	0.00313744	0.0201812	yes
Unigene0001036	50	15	1.31475	0.3873	-1.76327	0.000450769	0.00355806	yes
Unigene0001048	18376	6240.5	127.01	43.4312	-1.54814	1.38465e-56	3.76114e-54	yes
Unigene0001052	491.5	118	3.7908	0.92975	-2.02759	1.63393e-15	5.25999e-14	yes
Unigene0001053	23.5	4	1.6276	0.2893	-2.49211	0.00117312	0.00839342	yes
Unigene0001063	36	252	2.66605	19.0086	2.83388	2.35241e-17	8.66647e-16	yes
Unigene0001064	150	41	4.257	1.1561	-1.88057	1.43025e-09	2.62131e-08	yes
Unigene0001079	282	127.5	2.79285	1.2856	-1.1193	6.24631e-06	7.00711e-05	yes
Unigene0001096	1	13	0.05405	0.70045	3.69592	0.00432156	0.026685	yes
Unigene0001105	47677.5	176438	532.761	1981.12	1.89476	1.90196e-61	6.21814e-59	yes
Unigene0001111	102.5	20	4.1263	0.78985	-2.3852	2.24259e-09	4.01578e-08	yes
Unigene0001112	118	27.5	7.50355	1.7451	-2.10426	1.55489e-10	3.17004e-09	yes
Unigene0001113	39	5	2.70365	0.33	-3.03437	7.82833e-05	0.000719911	yes
Unigene0001114	7302.5	2019.5	68.5231	19.1936	-1.83597	5.66819e-40	7.47517e-38	yes
Unigene0001116	67	32.5	3.2892	1.601	-1.03876	0.00503458	0.030417	yes
Unigene0001123	115.5	0	2.57	0.001	-11.3276	1.364e-24	8.17471e-23	yes
Unigene0001124	11.5	1	0.3974	0.03245	-3.6143	0.00883187	0.0492395	yes
Unigene0001128	410.5	113	3.61745	0.99385	-1.86387	2.05346e-19	8.78644e-18	yes
Unigene0001149	943	5969	5.5082	34.7411	2.65699	4.01796e-75	1.90759e-72	yes
Unigene0001155	1355.5	642.5	26.5786	12.7632	-1.05827	1.3685e-09	2.51234e-08	yes
Unigene0001156	11388.5	5655	28.5242	14.2314	-1.00312	4.70709e-28	3.41752e-26	yes
Unigene0001158	1693	810.5	9.05255	4.3655	-1.05218	2.67232e-17	9.77248e-16	yes
Unigene0001172	2092	925.5	15.6287	6.97685	-1.16355	9.80517e-19	4.02211e-17	yes
Unigene0001175	21.5	882.5	0.24195	9.61195	5.31205	2.132e-23	1.18658e-21	yes
Unigene0001177	24	151	0.93815	6.09205	2.69904	2.71439e-08	4.26353e-07	yes
Unigene0001178	2.5	31.5	0.16715	2.07535	3.63414	4.99806e-06	5.68627e-05	yes
Unigene0001179	21.5	134	1.7668	11.1789	2.66157	2.44403e-13	6.56366e-12	yes
Unigene0001191	42	214	1.18005	5.9046	2.32299	1.57736e-08	2.54645e-07	yes
Unigene0001194	516	257	5.37135	2.6807	-1.00267	2.30745e-09	4.11976e-08	yes
Unigene0001199	201.5	57.5	6.64945	1.9438	-1.77436	1.42579e-08	2.31476e-07	yes
Unigene0001200	38.5	9.5	1.7752	0.4271	-2.05534	0.00115645	0.00828586	yes
Unigene0001201	350	136.5	2.6053	1.0348	-1.3321	1.64229e-07	2.32898e-06	yes
Unigene0001209	610	186.5	4.3416	1.34135	-1.69454	1.6583e-20	7.64695e-19	yes
Unigene0001231	1082	3205.5	12.5063	37.3806	1.57963	2.7504e-27	1.92768e-25	yes
Unigene0001234	211.5	102	1.9363	0.93595	-1.0488	4.61863e-05	0.000444044	yes
Unigene0001245	8.5	0	0.7609	0.001	-9.57156	0.00524742	0.0314799	yes
Unigene0001273	133	65.5	4.72265	2.3206	-1.0251	0.000285854	0.00235649	yes
Unigene0001290	132.5	570	1.6502	7.1127	2.10776	9.36895e-26	6.01796e-24	yes
Unigene0001295	1918.5	440	13.3837	3.09015	-2.11473	1.88648e-36	2.14579e-34	yes
Unigene0001299	56.5	26.5	1.85475	0.8841	-1.06894	0.00854681	0.0478594	yes
Unigene0001310	129	352.5	1.27215	3.4923	1.45691	4.66448e-13	1.22203e-11	yes
Unigene0001320	492.5	237.5	1.92435	0.94125	-1.03172	1.15154e-07	1.66813e-06	yes
Unigene0001321	169	74.5	1.34165	0.59035	-1.18437	2.91612e-05	0.000291228	yes
Unigene0001324	401	103.5	2.3109	0.6012	-1.94254	9.2678e-19	3.81556e-17	yes
Unigene0001339	13.5	0	0.59575	0.001	-9.21856	0.000602647	0.00462515	yes
Unigene0001345	47	8.5	0.55665	0.0994	-2.48545	7.82359e-05	0.000719596	yes
Unigene0001369	7	29	0.1422	0.6064	2.09235	0.0045442	0.0278331	yes
Unigene0001392	957	2260.5	3.71565	8.75955	1.23724	4.32855e-20	1.94992e-18	yes
Unigene0001401	1507	3920.5	25.363	66.114	1.38223	1.99838e-33	1.9311e-31	yes
Unigene0001402	442.5	1309.5	7.4427	22.0561	1.56728	6.07416e-24	3.53181e-22	yes
Unigene0001416	45.5	101.5	2.3312	5.1768	1.15099	0.000435528	0.00345023	yes
Unigene0001433	162.5	614.5	3.8759	14.7817	1.9312	5.76361e-21	2.74113e-19	yes
Unigene0001434	361	2119	4.9351	29.3256	2.57101	2.75676e-59	8.1801e-57	yes
Unigene0001473	125.5	622	1.8369	9.17435	2.32033	1.91992e-28	1.41654e-26	yes
Unigene0001495	265	1128.5	2.21675	9.56815	2.10979	6.41013e-24	3.7232e-22	yes
Unigene0001518	263	536.5	4.18	8.52495	1.02819	1.89284e-08	3.02534e-07	yes
Unigene0001539	6.5	25.5	0.31445	1.2404	1.9799	0.00255321	0.0168256	yes
Unigene0001560	181	57.5	3.9259	1.28915	-1.6066	3.48591e-05	0.000343049	yes
Unigene0001576	9.5	52.5	0.2981	1.65465	2.47266	3.66722e-07	4.93647e-06	yes
Unigene0001578	132	7	1.1748	0.061	-4.26746	9.4065e-24	5.41747e-22	yes
Unigene0001579	256	812.5	2.8762	9.1421	1.66836	3.01639e-14	8.73218e-13	yes
Unigene0001581	15679	7424	225.08	107.025	-1.07249	2.15931e-28	1.58887e-26	yes
Unigene0001587	7219.5	3405.5	181.941	86.3537	-1.07514	2.29177e-22	1.20314e-20	yes
Unigene0001616	95.5	28.5	0.96095	0.28825	-1.73714	1.00324e-06	1.27621e-05	yes
Unigene0001625	92	28	0.97815	0.2976	-1.71668	1.57963e-06	1.94771e-05	yes
Unigene0001633	14.5	1.5	0.39175	0.03805	-3.36396	0.00453224	0.027766	yes
Unigene0001634	128.5	489.5	1.22345	4.72835	1.95038	1.59851e-17	5.96552e-16	yes
Unigene0001642	5	62.5	0.0587	0.73315	3.64268	1.09373e-11	2.50694e-10	yes
Unigene0001648	26	5	0.3259	0.0642	-2.34378	0.000908072	0.006689	yes
Unigene0001657	12.5	1	0.6669	0.05395	-3.62778	0.00545925	0.0325967	yes
Unigene0001664	8555.5	4184.5	34.7389	17.1012	-1.02245	3.62561e-25	2.252e-23	yes
Unigene0001672	378.5	132.5	5.03545	1.74425	-1.52951	5.45805e-09	9.35924e-08	yes
Unigene0001685	592	113.5	3.20055	0.62005	-2.36786	1.71009e-29	1.34342e-27	yes
Unigene0001689	245	87.5	1.1316	0.4071	-1.47491	2.80449e-07	3.85109e-06	yes
Unigene0001695	161	398.5	2.2448	5.5931	1.31706	9.27403e-08	1.36297e-06	yes
Unigene0001703	5039.5	10709	45.4826	97.0768	1.09381	6.87455e-26	4.45768e-24	yes
Unigene0001716	748.5	314.5	10.6359	4.50425	-1.23959	4.48899e-12	1.06979e-10	yes
Unigene0001719	93	9	0.99675	0.0973	-3.35672	3.87605e-14	1.11558e-12	yes
Unigene0001736	2842	9804	20.213	69.6925	1.78572	2.57383e-62	8.8381e-60	yes
Unigene0001744	11	0	0.5078	0.001	-8.98812	0.000932427	0.00683796	yes
Unigene0001749	7950.5	3113.5	215.235	83.4518	-1.3669	1.6156e-13	4.40602e-12	yes
Unigene0001750	282.5	13	3.91205	0.1826	-4.42117	1.3384e-35	1.49435e-33	yes
Unigene0001756	203	89	2.2372	0.98615	-1.18182	3.58795e-07	4.83691e-06	yes
Unigene0001759	2834	6219.5	52.5697	114.501	1.12305	8.44086e-14	2.35972e-12	yes
Unigene0001760	57	476.5	1.81725	14.9662	3.04188	1.97841e-20	9.1e-19	yes
Unigene0001761	1619.5	736.5	24.6944	11.3015	-1.12768	4.64918e-15	1.44389e-13	yes
Unigene0001765	752	374.5	12.6453	6.28145	-1.00943	1.05824e-09	1.96591e-08	yes
Unigene0001779	270	72.5	3.0923	0.8372	-1.88504	2.00915e-12	4.91249e-11	yes
Unigene0001789	1040	237.5	27.104	6.2533	-2.11581	1.43479e-32	1.31659e-30	yes
Unigene0001801	24	6	1.34385	0.3312	-2.0206	0.00391827	0.0244843	yes
Unigene0001817	16	2	0.46205	0.06025	-2.93902	0.00537566	0.0321574	yes
Unigene0001818	24.5	4	0.6049	0.10495	-2.52699	0.00200249	0.0135547	yes
Unigene0001828	12	0	0.91035	0.001	-9.83028	0.00109199	0.00787721	yes
Unigene0001841	126.5	14.5	1.25125	0.14785	-3.08116	6.58586e-14	1.86212e-12	yes
Unigene0001854	8868.5	2894	125.723	41.2013	-1.60948	1.13581e-22	6.06115e-21	yes
Unigene0001855	3899.5	15609	20.5674	82.1474	1.99785	2.46261e-61	7.95584e-59	yes
Unigene0001856	51	20.5	0.99035	0.40115	-1.3038	0.00163016	0.0112806	yes
Unigene0001879	55	7.5	2.61575	0.35135	-2.89624	2.93171e-07	4.00966e-06	yes
Unigene0001884	984.5	354	11.4506	4.1325	-1.47034	9.11065e-25	5.54541e-23	yes
Unigene0001891	254	21.5	5.8835	0.5245	-3.48766	1.84792e-12	4.53858e-11	yes
Unigene0001898	630.5	17.5	7.51605	0.21085	-5.15569	4.84795e-62	1.63388e-59	yes
Unigene0001899	348	140	3.28835	1.3331	-1.30258	7.17141e-11	1.51353e-09	yes
Unigene0001905	16	391.5	0.4477	10.9047	4.60628	2.69904e-48	5.15253e-46	yes
Unigene0001912	0.5	13	0.03645	0.91675	4.65254	0.0031238	0.0201077	yes
Unigene0001923	179	430	12.4288	29.8149	1.26235	7.0874e-09	1.20099e-07	yes
Unigene0001924	5103.5	805	53.2497	8.458	-2.65438	4.54013e-48	8.60702e-46	yes
Unigene0001925	107.5	9.5	6.68035	0.58885	-3.50395	1.95924e-14	5.75111e-13	yes
Unigene0001928	0	17	0.001	0.5161	9.01151	1.51802e-05	0.000159755	yes
Unigene0001931	236.5	50	2.29205	0.49725	-2.2046	1.53171e-12	3.78751e-11	yes
Unigene0001936	22	0	0.7132	0.001	-9.47816	1.14528e-06	1.4441e-05	yes
Unigene0001937	2074.5	220.5	18.3891	1.9984	-3.20193	2.17703e-52	4.85149e-50	yes
Unigene0001941	12057	2848	78.9768	18.8188	-2.06926	1.74995e-56	4.68352e-54	yes
Unigene0001942	248	106.5	7.15225	3.1209	-1.19644	1.5656e-06	1.9326e-05	yes
Unigene0001943	36	3	0.8424	0.0659	-3.67616	4.06016e-06	4.68067e-05	yes
Unigene0001946	77.5	15	0.7323	0.14435	-2.34286	7.91381e-09	1.33193e-07	yes
Unigene0001947	16	42	0.227	0.6027	1.40875	0.0029007	0.0188426	yes
Unigene0001951	7.5	73	0.14645	1.45245	3.31001	6.08653e-11	1.29053e-09	yes
Unigene0001953	2	246.5	0.06065	7.1586	6.88303	3.77698e-15	1.17905e-13	yes
Unigene0001954	0	98.5	0.001	4.115	12.0067	2.47057e-27	1.73601e-25	yes
Unigene0001955	151764	393184	425.079	1104.81	1.378	1.20938e-29	9.56953e-28	yes
Unigene0001956	0	65.5	0.001	2.8797	11.4917	3.45767e-12	8.32372e-11	yes
Unigene0001957	8560.5	92495.5	117.716	1280.92	3.4438	5.16898e-144	9.10374e-141	yes
Unigene0001964	776.5	380.5	4.6271	2.29035	-1.01454	1.2762e-10	2.62342e-09	yes
Unigene0001975	321.5	765.5	4.4155	10.5665	1.25886	1.18493e-13	3.28066e-12	yes
Unigene0001978	202.5	66	5.40105	1.76785	-1.61124	1.93028e-10	3.89322e-09	yes
Unigene0001986	1391	438	9.43475	2.98565	-1.65994	2.01624e-33	1.94492e-31	yes
Unigene0002013	5	31.5	0.131	0.82515	2.65509	4.70071e-05	0.000451132	yes
Unigene0002028	53.5	9	1.29445	0.2147	-2.59195	2.8099e-07	3.85658e-06	yes
Unigene0002031	390.5	183	9.02515	4.2241	-1.09531	3.09232e-08	4.81971e-07	yes
Unigene0002033	142	39.5	0.904	0.2583	-1.80728	5.55602e-06	6.28309e-05	yes
Unigene0002034	67.5	212	0.53455	1.6791	1.65129	1.45989e-10	2.98416e-09	yes
Unigene0002041	14.5	147.5	0.18725	1.92275	3.36013	2.09435e-20	9.60572e-19	yes
Unigene0002043	133.5	426	0.5557	1.77435	1.67491	2.95396e-17	1.07592e-15	yes
Unigene0002045	75.5	18.5	1.6499	0.40695	-2.01946	1.98673e-06	2.41048e-05	yes
Unigene0002047	46	13	1.9317	0.5384	-1.84312	0.00213539	0.0143263	yes
Unigene0002051	590	280	9.50555	4.5404	-1.06595	4.75183e-09	8.20494e-08	yes
Unigene0002054	79.5	33.5	0.5605	0.2337	-1.26206	0.000583117	0.00449612	yes
Unigene0002063	15.5	1.5	0.6974	0.06655	-3.38948	0.00171771	0.0118145	yes
Unigene0002064	88.5	38.5	2.60545	1.12645	-1.20975	0.000315988	0.00258326	yes
Unigene0002087	3.5	19.5	0.19305	1.05055	2.4441	0.00887721	0.0494519	yes
Unigene0002088	3790.5	8226.5	90.281	197.273	1.1277	6.61665e-27	4.54982e-25	yes
Unigene0002098	44	145.5	0.8684	2.89505	1.73716	4.40928e-09	7.64733e-08	yes
Unigene0002143	90.5	35	0.8027	0.3157	-1.34631	0.000137699	0.00120482	yes
Unigene0002145	1646	706.5	22.5009	9.84455	-1.19259	1.50816e-10	3.07937e-09	yes
Unigene0002147	230.5	51.5	5.07085	1.12095	-2.17751	1.94813e-14	5.72466e-13	yes
Unigene0002151	15.5	53	0.2632	0.91	1.78971	7.30675e-05	0.000676732	yes
Unigene0002155	27.5	0	0.67135	0.001	-9.39092	3.19441e-08	4.97031e-07	yes
Unigene0002156	25	87	1.53785	5.2751	1.77828	4.55554e-05	0.000438897	yes
Unigene0002157	150.5	545.5	5.327	19.0079	1.8352	5.33083e-10	1.02556e-08	yes
Unigene0002158	33	211	2.6588	16.8646	2.66515	1.24139e-13	3.42655e-12	yes
Unigene0002159	17877	132972	66.1492	491.68	2.89393	1.62311e-126	2.10997e-123	yes
Unigene0002160	157869	560132	681.681	2422.13	1.82911	3.93184e-56	1.03706e-53	yes
Unigene0002161	94946	319120	1146.79	3863.53	1.75232	1.10353e-48	2.1518e-46	yes
Unigene0002162	1681	4855.5	74.646	217.486	1.54279	9.19242e-44	1.43807e-41	yes
Unigene0002165	6	46.5	0.15105	1.1894	2.97714	3.18597e-07	4.33677e-06	yes
Unigene0002185	18.5	0.5	0.83655	0.02445	-5.09655	7.11791e-05	0.000660475	yes
Unigene0002187	19	1.5	1.71515	0.1463	-3.55133	0.0005782	0.00446199	yes
Unigene0002190	20.5	4.5	1.79885	0.383	-2.23166	0.00667882	0.0388621	yes
Unigene0002201	57	145	0.78025	1.9383	1.31278	0.00534292	0.031979	yes
Unigene0002206	7287.5	3291.5	41.9568	19.0972	-1.13554	2.46478e-30	2.01757e-28	yes
Unigene0002214	33	3	0.9856	0.0924	-3.41504	4.4757e-05	0.000432044	yes
Unigene0002219	93	26.5	0.72895	0.207	-1.81619	6.8743e-06	7.66747e-05	yes
Unigene0002226	375	171.5	2.7671	1.2842	-1.1075	2.73619e-06	3.24691e-05	yes
Unigene0002229	86.5	32.5	4.4108	1.6594	-1.41038	5.64734e-05	0.000535208	yes
Unigene0002239	33.5	4.5	2.29895	0.3042	-2.91788	2.65627e-05	0.000267479	yes
Unigene0002253	356	1231.5	4.00275	13.8787	1.7938	1.21297e-37	1.44914e-35	yes
Unigene0002254	86.5	285.5	2.4881	8.1503	1.71181	1.11456e-10	2.30765e-09	yes
Unigene0002255	215.5	993	3.6202	16.7398	2.20914	2.05102e-47	3.78316e-45	yes
Unigene0002256	1059	5681.5	4.9534	26.6041	2.42515	2.2219e-105	2.05612e-102	yes
Unigene0002257	83	31	5.0679	1.88765	-1.4248	0.000200261	0.00170256	yes
Unigene0002264	548.5	211.5	17.8802	6.8931	-1.37513	1.90314e-12	4.66372e-11	yes
Unigene0002277	80.5	36.5	1.6237	0.7251	-1.16303	0.00277915	0.0181416	yes
Unigene0002279	375.5	69	3.87125	0.7114	-2.44407	2.88779e-28	2.11067e-26	yes
Unigene0002282	25.5	133.5	0.58295	3.0904	2.40635	1.7583e-07	2.48382e-06	yes
Unigene0002285	193	49.5	3.0176	0.778	-1.95556	1.00633e-11	2.31244e-10	yes
Unigene0002290	658.5	150.5	5.5039	1.2638	-2.12269	3.93987e-32	3.53797e-30	yes
Unigene0002294	426	172.5	4.18665	1.71405	-1.28839	1.20893e-08	1.98453e-07	yes
Unigene0002298	384	159.5	3.01295	1.2816	-1.23323	1.78853e-05	0.000185612	yes
Unigene0002310	2.5	32	0.0868	1.10605	3.67158	1.17534e-05	0.0001259	yes
Unigene0002331	1714.5	406.5	23.9723	5.7558	-2.05828	1.21277e-36	1.38235e-34	yes
Unigene0002334	168	70.5	4.2204	1.776	-1.24875	7.97414e-07	1.02755e-05	yes
Unigene0002336	99	17	2.84775	0.51295	-2.47293	0.000186641	0.00159547	yes
Unigene0002341	1866.5	741.5	8.94075	3.57465	-1.32259	3.27169e-26	2.16257e-24	yes
Unigene0002347	89.5	462	1.44135	7.46605	2.37292	1.86161e-32	1.70537e-30	yes
Unigene0002356	3922.5	10242.5	28.288	73.6202	1.37991	1.72926e-31	1.50102e-29	yes
Unigene0002361	1879	660	17.6125	6.22955	-1.4994	2.66955e-32	2.42113e-30	yes
Unigene0002368	270572	575854	1022.58	2210.55	1.11219	2.70276e-13	7.23358e-12	yes
Unigene0002371	1082.5	492	6.19675	2.8674	-1.11177	2.29424e-09	4.1002e-08	yes
Unigene0002375	479	1497	7.4848	23.5465	1.65347	2.83806e-36	3.20812e-34	yes
Unigene0002376	27.5	6.5	0.5015	0.1203	-2.05961	0.00117476	0.00840405	yes
Unigene0002380	25.5	57	0.4012	0.8985	1.1632	0.00282169	0.0183907	yes
Unigene0002381	559	260.5	12.4866	5.8794	-1.08665	1.30728e-06	1.63404e-05	yes
Unigene0002393	9	38.5	0.3922	1.6403	2.0643	0.00423673	0.0262056	yes
Unigene0002395	13	51	0.20685	0.83355	2.01068	0.000166543	0.0014374	yes
Unigene0002396	19317	9303.5	107.777	52.2706	-1.04398	7.04217e-30	5.64594e-28	yes
Unigene0002405	646.5	297.5	7.3902	3.4121	-1.11495	1.22813e-11	2.80206e-10	yes
Unigene0002424	41.5	12	0.6206	0.1854	-1.74302	0.00150061	0.0104623	yes
Unigene0002428	2.5	185	0.1034	7.27215	6.13607	9.21083e-10	1.71988e-08	yes
Unigene0002459	25.5	6	0.4901	0.111	-2.14252	0.00479032	0.0291411	yes
Unigene0002481	43	15	0.6401	0.2287	-1.48484	0.00451595	0.0276756	yes
Unigene0002483	118	40	4.78035	1.6116	-1.56862	1.06349e-05	0.000114639	yes
Unigene0002489	235.5	101	2.59275	1.13235	-1.19516	4.41151e-06	5.06434e-05	yes
Unigene0002497	237.5	37.5	3.3078	0.5294	-2.64344	1.12183e-19	4.91571e-18	yes
Unigene0002501	862.5	105.5	12.0259	1.48	-3.02248	3.92644e-32	3.53173e-30	yes
Unigene0002502	413.5	35.5	3.9649	0.34365	-3.52827	2.88988e-30	2.35495e-28	yes
Unigene0002508	28	120.5	0.96285	4.20105	2.12537	3.40171e-06	3.98042e-05	yes
Unigene0002514	725	333.5	7.7231	3.55105	-1.12093	1.46014e-12	3.61873e-11	yes
Unigene0002518	265.5	88	2.1177	0.71045	-1.57569	2.02108e-10	4.07035e-09	yes
Unigene0002525	333	144.5	5.0896	2.18925	-1.21712	4.56999e-07	6.07974e-06	yes
Unigene0002530	21368	163458	101.702	777.426	2.93435	2.11126e-157	4.61083e-154	yes
Unigene0002537	389	910	5.06785	11.8297	1.22297	1.40981e-11	3.19787e-10	yes
Unigene0002636	351.5	119.5	6.15665	2.10675	-1.54713	4.32486e-14	1.23952e-12	yes
Unigene0002640	57.5	24	0.67205	0.2815	-1.25543	0.00125847	0.00893383	yes
Unigene0002642	27	5.5	0.41575	0.08805	-2.23932	0.00357845	0.0226616	yes
Unigene0002652	1	18	0.03325	0.61545	4.21022	0.000303665	0.00248942	yes
Unigene0002673	34.5	271	1.20805	9.4696	2.97062	2.18834e-26	1.45529e-24	yes
Unigene0002678	163	55	1.1372	0.3883	-1.55024	1.23954e-08	2.03171e-07	yes
Unigene0002681	6.5	61	0.0898	0.84625	3.2363	2.29205e-09	4.09763e-08	yes
Unigene0002696	140	424	1.97525	6.0389	1.61225	8.91423e-13	2.26477e-11	yes
Unigene0002707	12	136.5	0.7093	8.2256	3.53565	9.15772e-09	1.53137e-07	yes
Unigene0002708	587.5	261	12.4265	5.5479	-1.1634	2.70391e-12	6.55833e-11	yes
Unigene0002714	5	28.5	0.31825	1.81925	2.51511	0.000486935	0.00381704	yes
Unigene0002723	32.5	66.5	1.3906	2.87325	1.04698	0.00379114	0.0237945	yes
Unigene0002727	118.5	51	1.11265	0.4776	-1.22013	6.79029e-05	0.000633412	yes
Unigene0002728	1059.5	515.5	9.60235	4.70875	-1.02804	3.79956e-13	1.00362e-11	yes
Unigene0002731	16	1	0.37055	0.0217	-4.0939	0.00115436	0.00827325	yes
Unigene0002750	128.5	44.5	4.97335	1.7067	-1.54301	1.19823e-06	1.5074e-05	yes
Unigene0002769	4702	1577	14.5083	4.8871	-1.56982	9.96247e-34	9.78293e-32	yes
Unigene0002775	27.5	2	0.7481	0.0588	-3.66934	4.42461e-05	0.000427263	yes
Unigene0002778	24	2.5	0.76045	0.08335	-3.1896	0.000143476	0.00125136	yes
Unigene0002779	124.5	27	3.9304	0.84455	-2.21842	1.20482e-10	2.48511e-09	yes
Unigene0002788	36.5	11.5	0.94	0.3036	-1.63049	0.00238173	0.0158178	yes
Unigene0002796	49	14.5	1.34575	0.40455	-1.73402	0.000325467	0.0026546	yes
Unigene0002801	35.5	78.5	0.78465	1.78685	1.1873	0.00760598	0.0433658	yes
Unigene0002803	1330	396	5.55855	1.67415	-1.73128	6.82382e-27	4.68049e-25	yes
Unigene0002805	812.5	277.5	6.04235	2.07005	-1.54544	1.07978e-22	5.76847e-21	yes
Unigene0002806	1945	4370.5	16.2144	36.2824	1.16199	1.32119e-18	5.39122e-17	yes
Unigene0002811	155	19	4.7728	0.59235	-3.01031	5.43245e-17	1.95004e-15	yes
Unigene0002817	68.5	8.5	0.8998	0.11415	-2.97867	2.69845e-10	5.34967e-09	yes
Unigene0002819	68.5	2.5	3.1323	0.11705	-4.74203	3.49434e-14	1.00784e-12	yes
Unigene0002821	107	12	0.7829	0.0896	-3.12726	9.95901e-13	2.51732e-11	yes
Unigene0002824	2069	6255	13.5643	41.3098	1.60667	1.72963e-19	7.44751e-18	yes
Unigene0002830	61.5	8	1.3768	0.1747	-2.97837	2.05899e-06	2.49095e-05	yes
Unigene0002835	567	1153.5	3.39235	6.93605	1.03183	4.91936e-09	8.47814e-08	yes
Unigene0002840	14	58	0.3988	1.65775	2.05549	1.50889e-05	0.000158855	yes
Unigene0002843	48.5	11.5	0.56605	0.1278	-2.14704	0.00304829	0.0196843	yes
Unigene0002844	792.5	295	8.0301	3.01905	-1.41132	1.34228e-17	5.02991e-16	yes
Unigene0002845	89.5	30	1.14555	0.3985	-1.52339	0.000917965	0.00674368	yes
Unigene0002848	0	8.5	0.001	0.18185	7.50661	0.00488134	0.0296091	yes
Unigene0002864	1517.5	709.5	17.2434	8.12625	-1.08538	2.43052e-15	7.70178e-14	yes
Unigene0002869	261	42	1.62825	0.26085	-2.64203	1.70915e-19	7.36512e-18	yes
Unigene0002889	21	3.5	0.57675	0.0941	-2.61568	0.00193243	0.0131211	yes
Unigene0002893	65	13	0.98125	0.20105	-2.28707	1.81752e-05	0.000188405	yes
Unigene0002904	68	11	0.6466	0.10285	-2.65233	9.91639e-09	1.65116e-07	yes
Unigene0002906	143.5	67.5	3.10385	1.4838	-1.06476	0.000218337	0.00184019	yes
Unigene0002917	104.5	49	2.01265	0.94435	-1.0917	0.000279258	0.00230805	yes
Unigene0002925	1867	839.5	9.45495	4.2859	-1.14147	1.40398e-19	6.0837e-18	yes
Unigene0002950	471.5	210	4.09345	1.8303	-1.16124	1.69471e-10	3.43458e-09	yes
Unigene0002969	51414.5	16258.5	1013.38	323.003	-1.64955	1.52112e-68	5.89009e-66	yes
Unigene0002975	2617.5	1291.5	15.1087	7.5253	-1.00555	1.24085e-16	4.34005e-15	yes
Unigene0003000	767.5	332.5	5.37015	2.3406	-1.19808	1.48739e-14	4.42072e-13	yes
Unigene0003021	1456	5891.5	35.8972	144.942	2.01354	1.56066e-56	4.21827e-54	yes
Unigene0003022	0.5	10	0.0234	0.46455	4.31125	0.00761322	0.0434026	yes
Unigene0003026	12	0	0.36335	0.001	-8.50522	0.000684693	0.00518919	yes
Unigene0003033	563.5	1396	2.7107	6.74965	1.31615	1.99686e-23	1.11249e-21	yes
Unigene0003044	82.5	35.5	2.99495	1.29405	-1.21064	0.000339318	0.00275525	yes
Unigene0003054	30.5	2	0.6625	0.0408	-4.02128	2.33789e-06	2.80474e-05	yes
Unigene0003058	209	63.5	4.5986	1.42605	-1.68917	4.3831e-05	0.00042378	yes
Unigene0003065	21	4	0.67445	0.1341	-2.3304	0.00466419	0.0284658	yes
Unigene0003074	4	31	0.11305	0.91555	3.01768	0.00243038	0.016102	yes
Unigene0003101	5714	2292.5	73.659	29.6218	-1.3142	5.48093e-39	6.99178e-37	yes
Unigene0003103	63	20.5	2.028	0.6626	-1.61385	4.27161e-05	0.000413792	yes
Unigene0003104	55	10	2.56815	0.4875	-2.39726	1.76983e-05	0.000183902	yes
Unigene0003106	969	190.5	25.5728	5.03215	-2.34536	4.12632e-35	4.47002e-33	yes
Unigene0003123	18.5	2.5	0.708	0.09255	-2.93544	0.00174354	0.0119758	yes
Unigene0003144	12069.5	4896.5	93.2091	37.9823	-1.29515	2.33677e-44	3.74143e-42	yes
Unigene0003168	26	7.5	0.68905	0.1958	-1.81523	0.00778286	0.0442294	yes
Unigene0003190	442.5	148	3.15705	1.06065	-1.57363	1.12605e-12	2.82537e-11	yes
Unigene0003199	456.5	138	2.9838	0.88915	-1.74665	3.3305e-11	7.32631e-10	yes
Unigene0003202	75	206.5	3.0445	8.5034	1.48183	2.12779e-06	2.56792e-05	yes
Unigene0003203	117.5	22.5	1.3059	0.25175	-2.37498	1.57543e-08	2.54484e-07	yes
Unigene0003223	131.5	16.5	5.85005	0.74585	-2.97149	2.54034e-16	8.67401e-15	yes
Unigene0003235	948	3009	31.3595	100.357	1.67816	8.28719e-15	2.52069e-13	yes
Unigene0003237	9.5	54.5	0.17865	1.0341	2.53317	1.78041e-07	2.51441e-06	yes
Unigene0003242	238.5	32	2.3038	0.31865	-2.85397	5.92268e-16	1.97295e-14	yes
Unigene0003243	318	65	7.60635	1.56765	-2.2786	2.22024e-23	1.23317e-21	yes
Unigene0003264	369.5	168	5.9985	2.80105	-1.09863	0.000235498	0.00197386	yes
Unigene0003266	741.5	351.5	8.1767	3.8776	-1.07635	3.10876e-12	7.50695e-11	yes
Unigene0003270	428.5	201	12.633	5.95215	-1.08571	8.3741e-10	1.57333e-08	yes
Unigene0003283	6498.5	3156	30.3589	14.7629	-1.04015	2.5647e-25	1.61508e-23	yes
Unigene0003285	1933	919	8.46955	4.05465	-1.06271	1.84514e-17	6.83828e-16	yes
Unigene0003309	4706.5	1321.5	27.2574	7.66895	-1.82955	1.92261e-63	6.77229e-61	yes
Unigene0003350	443	125	4.17195	1.18295	-1.81833	1.97468e-21	9.71292e-20	yes
Unigene0003375	6.5	36	0.1557	0.90715	2.54257	0.00232403	0.0154646	yes
Unigene0003379	16	97.5	0.4043	2.4605	2.60545	2.79651e-10	5.53202e-09	yes
Unigene0003390	5722	1885.5	54.7694	18.1142	-1.59625	1.57938e-56	4.24783e-54	yes
Unigene0003397	0	87	0.001	5.45895	12.4144	8.18753e-11	1.72197e-09	yes
Unigene0003398	1640.5	708.5	27.7768	12.1227	-1.19617	4.85201e-18	1.88486e-16	yes
Unigene0003403	176720	450848	2623.15	6672.6	1.34695	7.42236e-33	6.93914e-31	yes
Unigene0003413	8596	655.5	147.509	11.298	-3.70667	3.25177e-208	2.21925e-204	yes
Unigene0003415	42	5.5	0.6737	0.09295	-2.85758	1.94945e-05	0.000201012	yes
Unigene0003421	121	55	1.60185	0.7289	-1.13595	0.000404402	0.00322753	yes
Unigene0003425	34374.5	72493.5	477.285	1003.58	1.07223	7.19858e-22	3.66289e-20	yes
Unigene0003430	46	20	2.0262	0.8859	-1.19356	0.00558002	0.0332378	yes
Unigene0003438	2	30.5	0.03825	0.5965	3.96299	1.75761e-06	2.15162e-05	yes
Unigene0003456	333	62.5	1.6074	0.30045	-2.41953	4.06677e-20	1.83351e-18	yes
Unigene0003469	122.5	1420.5	6.9106	81.4934	3.5598	1.00171e-60	3.17972e-58	yes
Unigene0003481	968.5	4024.5	49.131	206.136	2.06889	3.41183e-62	1.16424e-59	yes
Unigene0003506	1.5	15	0.0651	0.6483	3.31593	0.00373624	0.0235094	yes
Unigene0003511	163.5	65	1.9711	0.804	-1.29373	0.000245078	0.0020485	yes
Unigene0003520	1	21	0.1023	2.162	4.40149	3.26995e-05	0.000323136	yes
Unigene0003522	3343.5	1073	20.1514	6.5183	-1.62831	6.98658e-43	1.05084e-40	yes
Unigene0003526	67.5	19	0.81755	0.22545	-1.8585	2.5657e-05	0.000259315	yes
Unigene0003538	664.5	1486.5	10.2199	23.0343	1.17241	3.00103e-14	8.69233e-13	yes
Unigene0003567	81	3	2.12055	0.081	-4.71037	1.59134e-13	4.3442e-12	yes
Unigene0003569	4865.5	2019	55.8338	23.2164	-1.26599	3.31483e-25	2.07075e-23	yes
Unigene0003576	36.5	3.5	0.6304	0.0592	-3.4126	4.89197e-07	6.48281e-06	yes
Unigene0003579	8.5	58.5	0.16795	1.17915	2.81164	1.17874e-07	1.70391e-06	yes
Unigene0003584	139.5	26	1.9987	0.38755	-2.36661	8.93386e-06	9.78084e-05	yes
Unigene0003594	1042.5	410	19.4339	7.7262	-1.33075	3.16737e-18	1.25222e-16	yes
Unigene0003595	207.5	89.5	1.15775	0.50805	-1.18828	0.000273943	0.00226927	yes
Unigene0003596	0	12	0.001	0.3966	8.63154	0.000622635	0.00475915	yes
Unigene0003599	79	15.5	0.98575	0.19765	-2.31827	3.30952e-06	3.88224e-05	yes
Unigene0003603	1629	736	40.3896	18.3054	-1.14172	1.1066e-20	5.18168e-19	yes
Unigene0003607	27	60.5	1.06965	2.4092	1.17142	0.00752857	0.0430188	yes
Unigene0003615	24	2.5	0.82065	0.08025	-3.35419	0.000362306	0.00292362	yes
Unigene0003618	4	311.5	0.12765	10.0897	6.30454	4.40122e-47	8.03672e-45	yes
Unigene0003630	96.5	27.5	3.2558	0.947	-1.78158	9.74111e-07	1.24147e-05	yes
Unigene0003638	151298	673098	1637.43	7297.84	2.15603	2.12801e-62	7.35349e-60	yes
Unigene0003651	407.5	89.5	4.95215	1.08145	-2.19509	1.43876e-18	5.8622e-17	yes
Unigene0003652	540.5	140	6.00125	1.55085	-1.9522	2.54007e-24	1.50906e-22	yes
Unigene0003657	602	130.5	15.8397	3.47225	-2.1896	2.93869e-31	2.51878e-29	yes
Unigene0003669	255	89.5	5.9695	2.11435	-1.4974	1.00574e-10	2.09506e-09	yes
Unigene0003670	36	7	2.8297	0.54945	-2.36459	8.70432e-05	0.000792196	yes
Unigene0003675	17	3	0.80615	0.14685	-2.45671	0.00557994	0.0332378	yes
Unigene0003676	54.5	17	2.77675	0.89605	-1.63175	0.000970242	0.00708009	yes
Unigene0003682	93.5	27.5	4.14325	1.22225	-1.76122	2.23953e-07	3.12002e-06	yes
Unigene0003683	309.5	62	10.0548	2.01915	-2.31606	1.34851e-23	7.62963e-22	yes
Unigene0003684	2596.5	591.5	27.8824	6.4127	-2.12035	5.72722e-45	9.56254e-43	yes
Unigene0003686	338	97.5	9.41425	2.75085	-1.77497	5.6643e-14	1.61157e-12	yes
Unigene0003690	140.5	27	6.8976	1.34755	-2.35576	1.88347e-11	4.22835e-10	yes
Unigene0003693	866.5	250	13.6868	4.0191	-1.76784	1.21515e-17	4.56604e-16	yes
Unigene0003712	557.5	1658	8.7595	26.2252	1.58203	1.34067e-23	7.59316e-22	yes
Unigene0003736	1837.5	858.5	14.3989	6.8048	-1.08133	3.54106e-15	1.1073e-13	yes
Unigene0003761	132	42	6.8448	2.25615	-1.60115	0.000123523	0.00109128	yes
Unigene0003763	14	0	0.4695	0.001	-8.87498	0.000178624	0.00153148	yes
Unigene0003779	115	47	1.15925	0.47585	-1.28461	2.81674e-05	0.000282181	yes
Unigene0003781	0.5	10	0.0435	0.86825	4.31902	0.00724288	0.041591	yes
Unigene0003794	141.5	305.5	3.40145	7.407	1.12274	2.39255e-07	3.31544e-06	yes
Unigene0003804	126.5	2889.5	2.7369	62.7133	4.51816	6.11809e-118	7.26164e-115	yes
Unigene0003814	52.5	5	1.1571	0.11115	-3.37993	2.41702e-08	3.81951e-07	yes
Unigene0003824	81	35	2.7236	1.19025	-1.19425	0.000499602	0.00390624	yes
Unigene0003834	479	165.5	10.4708	3.6537	-1.51893	3.53503e-16	1.19213e-14	yes
Unigene0003849	1313	281	8.64455	1.86165	-2.21521	1.38613e-33	1.34902e-31	yes
Unigene0003854	5.5	22	0.32665	1.325	2.02017	0.00852879	0.0477791	yes
Unigene0003870	1217.5	6736	17.7856	98.8961	2.47521	1.89568e-128	2.52439e-125	yes
Unigene0003873	19.5	0	0.72245	0.001	-9.49675	1.0259e-05	0.000111025	yes
Unigene0003896	21	3	0.4961	0.06995	-2.82623	0.00159358	0.0110526	yes
Unigene0003907	0	9	0.001	0.4589	8.84204	0.00855618	0.0478981	yes
Unigene0003944	583.5	219	10.2713	3.8662	-1.40963	6.05073e-08	9.136e-07	yes
Unigene0003947	54	7	0.8859	0.11705	-2.92002	1.22659e-08	2.01109e-07	yes
Unigene0003959	28	7	0.7011	0.18385	-1.93109	0.00784405	0.0445325	yes
Unigene0003960	16.5	0	0.5982	0.001	-9.22448	0.000224233	0.00188639	yes
Unigene0003969	21	1.5	0.7772	0.0521	-3.89893	0.000135318	0.00118627	yes
Unigene0003976	7684.5	2234	101.991	29.7397	-1.77798	8.34289e-74	3.73365e-71	yes
Unigene0003984	6589.5	2849	48.4862	21.0472	-1.20394	2.6723e-35	2.91223e-33	yes
Unigene0003986	41.5	5.5	1.0509	0.14135	-2.89428	2.83407e-06	3.35577e-05	yes
Unigene0003989	6154.5	2929.5	36.8199	17.6362	-1.06195	9.71849e-26	6.22052e-24	yes
Unigene0003999	46	1	1.1261	0.023	-5.61356	5.26171e-12	1.24094e-10	yes
Unigene0004008	72	18.5	0.9722	0.2537	-1.93813	4.05832e-06	4.67954e-05	yes
Unigene0004012	1	15	0.009	0.13155	3.86954	0.00295065	0.0191216	yes
Unigene0004016	619.5	2002	14.7956	48.2386	1.70502	7.04251e-31	5.9064e-29	yes
Unigene0004018	412.5	90	7.84245	1.73375	-2.17741	2.11487e-15	6.74854e-14	yes
Unigene0004022	195	66.5	2.32755	0.79555	-1.54879	1.27718e-09	2.35024e-08	yes
Unigene0004024	20	428.5	0.21705	4.65045	4.42127	1.93034e-58	5.46076e-56	yes
Unigene0004026	0	46	0.001	1.7131	10.7424	2.54413e-12	6.18729e-11	yes
Unigene0004029	1900.5	796.5	17.9528	7.51215	-1.25691	1.73485e-18	7.02143e-17	yes
Unigene0004030	26	4	0.6146	0.09545	-2.68683	0.000239875	0.00200746	yes
Unigene0004035	8.5	0	0.373	0.001	-8.54303	0.00524355	0.0314625	yes
Unigene0004043	1	19	0.02665	0.50535	4.24508	0.000110623	0.000986247	yes
Unigene0004044	25.5	3	1.12005	0.13615	-3.04029	9.93073e-05	0.000893242	yes
Unigene0004048	11.5	0	0.51895	0.001	-9.01945	0.000914974	0.00672713	yes
Unigene0004057	73	12	0.76105	0.1276	-2.57636	1.63778e-07	2.32319e-06	yes
Unigene0004065	2.5	23.5	0.08375	0.78665	3.23156	0.000142289	0.00124259	yes
Unigene0004076	2569	9364	11.4792	42.0963	1.87468	1.45414e-76	7.02593e-74	yes
Unigene0004080	34.5	5	1.5497	0.21705	-2.83589	6.59045e-05	0.000616668	yes
Unigene0004082	55	19.5	1.2854	0.45245	-1.50639	0.000506904	0.00395653	yes
Unigene0004086	413	187.5	6.3505	2.9072	-1.12724	8.61056e-10	1.61442e-08	yes
Unigene0004092	64	9.5	1.2488	0.1809	-2.78728	2.69741e-08	4.2393e-07	yes
Unigene0004096	56	5	1.6217	0.1398	-3.53607	7.23424e-07	9.38628e-06	yes
Unigene0004100	67	8	1.0592	0.1276	-3.05327	1.53179e-10	3.1253e-09	yes
Unigene0004119	207	72	1.35985	0.4776	-1.50957	0.000155654	0.0013496	yes
Unigene0004124	8.5	50.5	0.3821	2.32215	2.60344	0.00377479	0.0237158	yes
Unigene0004125	9.5	35	0.38835	1.46115	1.91167	0.00248517	0.0164248	yes
Unigene0004127	309	106.5	13.6692	4.7552	-1.52335	1.70927e-11	3.84835e-10	yes
Unigene0004131	890	280.5	5.3389	1.69895	-1.6519	1.13678e-22	6.06115e-21	yes
Unigene0004134	66.5	212	1.56655	4.89275	1.64305	1.93627e-05	0.000199728	yes
Unigene0004139	114.5	46.5	1.76255	0.7195	-1.2926	2.80543e-05	0.000281202	yes
Unigene0004143	538.5	211	7.0804	2.81395	-1.33123	7.60148e-12	1.76382e-10	yes
Unigene0004150	37	9	1.20725	0.29875	-2.01471	0.000210875	0.00178198	yes
Unigene0004157	1015	435	7.06305	3.0318	-1.22012	1.79856e-18	7.27389e-17	yes
Unigene0004159	0	14	0.001	0.6487	9.34141	0.000125845	0.00111018	yes
Unigene0004168	23	5	0.75945	0.17375	-2.12794	0.00690728	0.0399496	yes
Unigene0004173	14.5	45.5	0.55185	1.72005	1.6401	0.000708967	0.00535309	yes
Unigene0004177	31.5	6	0.5892	0.11055	-2.41406	0.000210586	0.00178008	yes
Unigene0004180	55.5	11.5	0.69195	0.1477	-2.228	9.42128e-06	0.000102753	yes
Unigene0004183	133.5	50.5	2.30235	0.87575	-1.39452	1.68072e-06	2.06211e-05	yes
Unigene0004184	609.5	1712	8.24065	23.2405	1.49581	9.07769e-21	4.27262e-19	yes
Unigene0004191	246	11	1.2579	0.05575	-4.4959	1.59144e-23	8.94847e-22	yes
Unigene0004195	242.5	8.5	7.9103	0.26925	-4.87671	1.01099e-24	6.11951e-23	yes
Unigene0004207	90	19	1.512	0.33305	-2.18265	2.28765e-05	0.000233112	yes
Unigene0004220	265	113	2.1637	0.9177	-1.23741	4.60973e-07	6.13111e-06	yes
Unigene0004226	15	0	0.5207	0.001	-9.02431	9.36731e-05	0.000846889	yes
Unigene0004254	187	84.5	4.90245	2.2367	-1.13213	3.5444e-06	4.12792e-05	yes
Unigene0004268	12	49.5	0.20495	0.84755	2.04803	1.4232e-05	0.000150152	yes
Unigene0004269	11	0	0.4594	0.001	-8.84361	0.00224161	0.0149673	yes
Unigene0004279	28	75	0.66195	1.82405	1.46235	0.00529096	0.0316965	yes
Unigene0004280	15364	43118.5	108.379	303.397	1.48512	3.0015e-41	4.22361e-39	yes
Unigene0004283	73.5	29.5	3.09955	1.23975	-1.32201	0.000386249	0.0030976	yes
Unigene0004284	9	41.5	0.17605	0.80515	2.19327	0.000530316	0.00412335	yes
Unigene0004287	1383.5	49	26.3109	0.9169	-4.84276	8.79827e-50	1.78576e-47	yes
Unigene0004294	2004.5	806	16.9812	6.8965	-1.30001	5.11845e-23	2.79457e-21	yes
Unigene0004295	596	274	16.5155	7.6229	-1.1154	3.73331e-09	6.5226e-08	yes
Unigene0004296	277	135	3.5312	1.70515	-1.05026	0.000369787	0.0029809	yes
Unigene0004297	71.5	160.5	3.0712	6.92155	1.17229	3.482e-06	4.06557e-05	yes
Unigene0004308	299	96.5	3.76205	1.21905	-1.62576	1.22059e-10	2.51479e-09	yes
Unigene0004310	512.5	91	4.32415	0.78585	-2.46009	1.58491e-18	6.44805e-17	yes
Unigene0004315	53.5	17.5	2.2992	0.76935	-1.57942	0.000602396	0.00462452	yes
Unigene0004317	17	0	0.732	0.001	-9.5157	1.58115e-05	0.000166047	yes
Unigene0004321	34.5	3	1.0923	0.0978	-3.48139	0.00220853	0.0147699	yes
Unigene0004328	367	70	3.77545	0.73735	-2.35623	9.24486e-15	2.79951e-13	yes
Unigene0004336	113.5	25.5	1.40935	0.32405	-2.12074	1.40874e-06	1.75005e-05	yes
Unigene0004337	3386.5	10174	49.6697	149.384	1.58858	1.12722e-55	2.88939e-53	yes
Unigene0004345	1	136	0.0221	3.007	7.08813	4.28727e-34	4.34279e-32	yes
Unigene0004357	60608	191562	841.854	2665.8	1.66293	1.1865e-55	3.02712e-53	yes
Unigene0004358	60409.5	201322	372.095	1241.25	1.73806	1.07158e-71	4.53535e-69	yes
Unigene0004359	56397	144274	1842.85	4722.43	1.35759	5.06535e-38	6.20086e-36	yes
Unigene0004384	2420.5	7713	25.3585	80.6893	1.66991	4.61294e-48	8.71478e-46	yes
Unigene0004400	1457	551.5	7.43865	2.83605	-1.39116	1.96174e-23	1.09405e-21	yes
Unigene0004406	22	4	0.65075	0.1235	-2.39759	0.00252634	0.0166606	yes
Unigene0004418	59	22	1.0341	0.3966	-1.38262	0.00175181	0.0120263	yes
Unigene0004423	0	23.5	0.001	0.5231	9.03094	2.11496e-06	2.55357e-05	yes
Unigene0004428	159.5	793	7.24725	35.8946	2.30826	5.60184e-26	3.65849e-24	yes
Unigene0004436	144	14.5	2.9761	0.29725	-3.32367	1.94577e-18	7.82866e-17	yes
Unigene0004446	199	1805.5	1.12875	10.241	3.18156	1.37916e-55	3.47001e-53	yes
Unigene0004453	36.5	238.5	0.655	4.26615	2.70337	6.17894e-18	2.37409e-16	yes
Unigene0004470	87	30	3.39725	1.20445	-1.49599	0.000157327	0.0013628	yes
Unigene0004471	273	129	3.4289	1.6362	-1.0674	5.76492e-07	7.57346e-06	yes
Unigene0004475	96.5	16	0.90065	0.1507	-2.57929	1.51473e-11	3.42589e-10	yes
Unigene0004493	10.5	34	0.2868	0.91895	1.67994	0.00430343	0.026582	yes
Unigene0004497	84.5	9	0.98985	0.11375	-3.12134	8.2031e-05	0.000751087	yes
Unigene0004498	288	74	6.84335	1.8079	-1.92039	1.64955e-09	2.99907e-08	yes
Unigene0004504	33	101	0.54165	1.6633	1.61862	7.72744e-07	9.97406e-06	yes
Unigene0004510	34.5	77.5	0.39985	0.90175	1.17327	0.000708713	0.00535191	yes
Unigene0004511	155	26.5	2.27655	0.3983	-2.51492	6.01858e-12	1.41152e-10	yes
Unigene0004523	3.5	32	0.1257	1.16165	3.20812	8.08809e-05	0.000741178	yes
Unigene0004536	160.5	7.5	1.349	0.0628	-4.42498	2.22159e-29	1.73277e-27	yes
Unigene0004540	37.5	92	1.21235	2.98435	1.29961	5.72011e-05	0.000541635	yes
Unigene0004541	12	0.5	0.31865	0.0125	-4.67197	0.00263039	0.0172842	yes
Unigene0004545	209.5	86.5	2.7314	1.1437	-1.25593	1.4107e-06	1.75168e-05	yes
Unigene0004547	58	27	1.6071	0.74895	-1.10152	0.00483391	0.0293834	yes
Unigene0004566	11.5	0	0.4236	0.001	-8.72656	0.000786601	0.00587267	yes
Unigene0004569	13	1	0.48295	0.03495	-3.78851	0.00513693	0.0309394	yes
Unigene0004578	0	88.5	0.001	1.5464	10.5947	1.05338e-18	4.31452e-17	yes
Unigene0004593	71.5	32	0.90195	0.4005	-1.17125	0.00201207	0.0136144	yes
Unigene0004602	23	5	0.55705	0.1173	-2.2476	0.00774626	0.0440644	yes
Unigene0004609	0	78	0.001	3.1632	11.6272	2.08655e-12	5.09716e-11	yes
Unigene0004612	877	419.5	7.6046	3.644	-1.06135	2.04768e-12	5.00445e-11	yes
Unigene0004615	19.5	4.5	0.7937	0.1892	-2.06868	0.00842951	0.0473444	yes
Unigene0004617	110.5	46.5	4.5001	1.90095	-1.24324	3.47042e-05	0.000341587	yes
Unigene0004627	167.5	49	3.21515	0.94765	-1.76246	3.32155e-10	6.52103e-09	yes
Unigene0004641	0.5	10	0.01825	0.37015	4.34214	0.00725303	0.0416186	yes
Unigene0004642	519.5	185.5	6.17345	2.2333	-1.4669	8.26028e-08	1.22387e-06	yes
Unigene0004643	30	158.5	0.7829	4.19155	2.42058	1.12658e-07	1.63767e-06	yes
Unigene0004646	2	61.5	0.0333	1.06125	4.9941	2.67417e-10	5.30345e-09	yes
Unigene0004656	1928.5	567	17.1108	5.015	-1.77059	1.3411e-13	3.68689e-12	yes
Unigene0004657	270	19.5	11.0839	0.8062	-3.78118	4.20353e-33	3.98445e-31	yes
Unigene0004663	10.5	76.5	0.21395	1.58295	2.88727	1.32731e-08	2.16712e-07	yes
Unigene0004667	261	109.5	6.36965	2.7121	-1.2318	4.06697e-06	4.68654e-05	yes
Unigene0004681	217	32	1.87	0.27745	-2.75274	9.57245e-15	2.89549e-13	yes
Unigene0004690	60515	196515	517.66	1681.98	1.70009	7.52458e-69	2.95559e-66	yes
Unigene0004692	205.5	46	2.156	0.4931	-2.12841	1.29364e-12	3.2207e-11	yes
Unigene0004698	31.5	1	1.2403	0.04255	-4.86539	3.60966e-07	4.86377e-06	yes
Unigene0004710	1	15	0.03295	0.49945	3.92199	0.00131171	0.00928038	yes
Unigene0004716	1431.5	5851.5	15.9252	64.9569	2.02818	2.10817e-61	6.85132e-59	yes
Unigene0004727	4	38.5	0.1066	1.0027	3.23361	1.22673e-05	0.000130834	yes
Unigene0004729	3	28	0.08055	0.76905	3.25512	0.000363702	0.00293402	yes
Unigene0004731	1294	440.5	34.4777	11.8066	-1.54607	8.71245e-31	7.27343e-29	yes
Unigene0004734	706	276	18.8591	7.47725	-1.33468	1.81354e-13	4.93107e-12	yes
Unigene0004744	70.5	3.5	2.01265	0.1018	-4.30529	7.26468e-13	1.85953e-11	yes
Unigene0004745	45	344	1.0786	8.30075	2.94408	4.81432e-34	4.84967e-32	yes
Unigene0004749	804.5	126.5	11.8875	1.89385	-2.65006	4.33104e-40	5.75344e-38	yes
Unigene0004750	4	32.5	0.0729	0.58285	2.99913	0.00012321	0.00108869	yes
Unigene0004752	0	27	0.001	0.7013	9.45389	1.54019e-08	2.48938e-07	yes
Unigene0004753	17176	7545.5	54.6611	24.0907	-1.18204	1.14954e-32	1.06377e-30	yes
Unigene0004755	15089	7166	172.937	82.7718	-1.06304	7.44738e-22	3.78596e-20	yes
Unigene0004758	27	0.5	0.47245	0.0082	-5.84839	1.30959e-07	1.8821e-06	yes
Unigene0004759	23.5	4	0.48665	0.0865	-2.49211	0.00136532	0.00961982	yes
Unigene0004778	312.5	82	8.8038	2.30655	-1.93239	8.10594e-17	2.87709e-15	yes
Unigene0004788	35	7.5	0.8872	0.18755	-2.24198	0.000205444	0.00174066	yes
Unigene0004789	1331	617.5	9.52065	4.44815	-1.09785	4.23697e-17	1.52996e-15	yes
Unigene0004790	361	143	9.0225	3.59605	-1.32711	5.5958e-11	1.19204e-09	yes
Unigene0004798	28.5	2	0.71805	0.05085	-3.81976	3.21542e-06	3.77783e-05	yes
Unigene0004805	722.5	53	8.3085	0.60615	-3.77684	3.91393e-64	1.40588e-61	yes
Unigene0004807	9	0	0.36725	0.001	-8.52062	0.00682614	0.039623	yes
Unigene0004813	0	10	0.001	0.9614	9.90899	0.00180768	0.012371	yes
Unigene0004815	72	24.5	2.87655	0.98635	-1.54417	3.03399e-05	0.000301291	yes
Unigene0004817	108	11	3.0167	0.30015	-3.32922	6.59396e-14	1.86344e-12	yes
Unigene0004821	102.5	33.5	1.5943	0.5247	-1.60336	0.000135124	0.00118476	yes
Unigene0004832	981	436.5	13.3463	5.9628	-1.16238	6.45865e-12	1.50825e-10	yes
Unigene0004835	247	61.5	10.5579	2.6729	-1.98185	3.98517e-08	6.12563e-07	yes
Unigene0004837	68	29	3.4843	1.4596	-1.2553	0.00330958	0.021144	yes
Unigene0004838	79	33.5	2.12575	0.9156	-1.21518	0.00288928	0.0187729	yes
Unigene0004847	607.5	244	10.1058	4.0902	-1.30493	2.12568e-11	4.76038e-10	yes
Unigene0004849	430	191.5	11.6668	5.2041	-1.16468	4.42769e-10	8.57549e-09	yes
Unigene0004862	8	72.5	0.11015	0.9947	3.17479	4.06988e-11	8.8388e-10	yes
Unigene0004867	0	9	0.001	0.164	7.35755	0.003695	0.0232767	yes
Unigene0004874	1247	2609	13.058	27.6008	1.07978	1.20487e-17	4.53365e-16	yes
Unigene0004879	23	0	0.57225	0.001	-9.1605	8.19322e-07	1.05453e-05	yes
Unigene0004882	1435.5	607	12.1254	5.1639	-1.2315	1.36007e-21	6.77526e-20	yes
Unigene0004889	0.5	12.5	0.012	0.3054	4.66959	0.00164912	0.0113958	yes
Unigene0004892	70.5	165	1.66185	3.9544	1.25067	0.000618121	0.00472995	yes
Unigene0004899	284	110.5	2.58385	1.00975	-1.35552	2.1696e-10	4.347e-09	yes
Unigene0004901	54.5	18	1.18615	0.3924	-1.59589	0.000156684	0.00135766	yes
Unigene0004903	139	3	2.21355	0.05155	-5.42425	8.17724e-21	3.86546e-19	yes
Unigene0004904	28.5	0.5	0.64765	0.01225	-5.72436	1.09569e-07	1.59697e-06	yes
Unigene0004907	216	48.5	1.74325	0.39215	-2.1523	7.49388e-10	1.41771e-08	yes
Unigene0004912	18	2.5	0.44095	0.0644	-2.77548	0.00267844	0.0175724	yes
Unigene0004920	156.5	447.5	1.1492	3.27355	1.51023	2.46223e-08	3.88646e-07	yes
Unigene0004922	549.5	87.5	7.01005	1.09605	-2.67711	3.50319e-18	1.38199e-16	yes
Unigene0004924	44	10.5	0.61205	0.1538	-1.99259	0.00159832	0.0110827	yes
Unigene0004926	760.5	314.5	7.9374	3.3022	-1.26524	1.12499e-16	3.9449e-15	yes
Unigene0004942	58.5	19	0.8513	0.2859	-1.57416	0.00308639	0.0199021	yes
Unigene0004945	5	38	0.0733	0.5665	2.95019	1.00837e-05	0.000109344	yes
Unigene0004948	18.5	87.5	0.18835	0.87715	2.21941	8.41499e-07	1.08078e-05	yes
Unigene0004953	1080.5	243	10.8262	2.4515	-2.14279	1.42122e-17	5.31842e-16	yes
Unigene0004956	74	19.5	1.13125	0.30895	-1.87247	4.60409e-05	0.00044295	yes
Unigene0004961	39	15	0.8223	0.3205	-1.35934	0.00668311	0.0388712	yes
Unigene0004966	53.5	10.5	1.144	0.23175	-2.30345	1.52418e-05	0.000160341	yes
Unigene0004969	28	8.5	1.4737	0.44965	-1.71257	0.003978	0.0248133	yes
Unigene0004970	112	49.5	1.3399	0.6005	-1.15789	0.000204556	0.00173502	yes
Unigene0004972	94.5	23.5	1.4693	0.3641	-2.01272	2.14432e-07	2.99272e-06	yes
Unigene0004975	25.5	3	0.36645	0.04245	-3.10978	0.000122455	0.00108324	yes
Unigene0004980	959.5	337	11.7712	4.14575	-1.50555	3.45887e-25	2.1547e-23	yes
Unigene0004985	55	11.5	0.8348	0.182	-2.19749	4.6973e-05	0.000450885	yes
Unigene0004990	400.5	130	9.76145	3.18995	-1.61356	5.44982e-14	1.55135e-12	yes
Unigene0004995	144	43.5	1.06355	0.3208	-1.72914	9.21132e-09	1.53928e-07	yes
Unigene0004996	72.5	30	1.0573	0.44685	-1.24252	0.00138795	0.00975535	yes
Unigene0005003	76.5	20.5	0.6497	0.17965	-1.85458	2.17402e-05	0.000222571	yes
Unigene0005019	67	14	0.9269	0.1953	-2.24672	1.66864e-06	2.05006e-05	yes
Unigene0005022	589	82.5	6.23475	0.87715	-2.82944	3.80396e-45	6.37081e-43	yes
Unigene0005023	217.5	103.5	3.0168	1.43545	-1.07152	4.86037e-06	5.53654e-05	yes
Unigene0005024	71	33.5	3.74475	1.80795	-1.05051	0.00651864	0.0380037	yes
Unigene0005029	27.5	5.5	0.36855	0.07205	-2.35479	0.000798151	0.00594752	yes
Unigene0005030	57.5	6	0.5587	0.0561	-3.316	1.1079e-08	1.83078e-07	yes
Unigene0005039	165.5	69	2.04855	0.87005	-1.23543	0.000279366	0.00230834	yes
Unigene0005042	49	539	0.4975	5.4954	3.46546	6.13901e-45	1.01262e-42	yes
Unigene0005048	287	117	1.08935	0.44765	-1.28302	1.86502e-06	2.27252e-05	yes
Unigene0005051	223.5	699.5	2.3499	7.09715	1.59464	0.00131533	0.00930241	yes
Unigene0005052	118	18	0.89585	0.14145	-2.66297	2.53562e-06	3.02138e-05	yes
Unigene0005062	73	256.5	0.5539	1.9499	1.8157	7.4979e-10	1.41798e-08	yes
Unigene0005066	1320.5	563	10.6431	4.5676	-1.2204	3.83411e-20	1.73147e-18	yes
Unigene0005068	17	3	0.51385	0.09355	-2.45754	0.00704353	0.0406286	yes
Unigene0005072	271.5	1686.5	1.9894	12.3625	2.63556	1.62453e-59	4.87342e-57	yes
Unigene0005076	14.5	72	0.10195	0.5157	2.33867	1.68768e-07	2.39087e-06	yes
Unigene0005077	316.5	144	2.6675	1.2056	-1.14574	1.52408e-05	0.000160341	yes
Unigene0005078	933	357	5.8076	2.23705	-1.37634	2.95997e-21	1.43652e-19	yes
Unigene0005081	61.5	21	1.6906	0.58825	-1.52303	0.000300217	0.00246485	yes
Unigene0005082	244	55.5	2.07565	0.47835	-2.11742	4.53162e-13	1.18836e-11	yes
Unigene0005090	734.5	31	7.576	0.3176	-4.57615	1.22169e-88	7.84729e-86	yes
Unigene0005091	375	111.5	3.8781	1.16465	-1.73545	7.55397e-16	2.49354e-14	yes
Unigene0005094	638.5	276	3.76295	1.6321	-1.20513	5.67178e-12	1.33363e-10	yes
Unigene0005097	0	14.5	0.001	0.18235	7.51057	0.00189613	0.0129035	yes
Unigene0005098	189	92.5	1.9994	0.9882	-1.01669	0.000195724	0.00166841	yes
Unigene0005104	159	11	1.2234	0.0859	-3.83209	1.14884e-23	6.5543e-22	yes
Unigene0005105	4.5	41.5	0.0545	0.50945	3.22461	2.3641e-07	3.28018e-06	yes
Unigene0005106	24	165	0.2756	1.8228	2.72551	9.93107e-06	0.000107797	yes
Unigene0005107	190.5	22	1.6291	0.185	-3.13848	1.99089e-17	7.35442e-16	yes
Unigene0005114	1648	771	8.1662	3.82535	-1.09407	1.64054e-16	5.68341e-15	yes
Unigene0005118	37.5	15.5	0.7031	0.29125	-1.27147	0.00854751	0.0478594	yes
Unigene0005124	3411	701	47.1705	9.80245	-2.26667	2.19461e-41	3.10418e-39	yes
Unigene0005132	136.5	3	1.6138	0.03495	-5.52903	7.55153e-30	6.02776e-28	yes
Unigene0005133	5	406.5	0.06335	5.16135	6.34826	1.6601e-70	6.76404e-68	yes
Unigene0005134	100	540.5	1.13145	6.15585	2.44379	4.78654e-24	2.79802e-22	yes
Unigene0005136	158	76.5	2.44655	1.2	-1.02771	0.000252432	0.00210448	yes
Unigene0005139	4	68	0.06	1.0139	4.07881	7.7328e-13	1.97657e-11	yes
Unigene0005141	46	15.5	1.1626	0.38555	-1.59236	0.0011855	0.00847197	yes
Unigene0005145	118	13.5	1.93785	0.2312	-3.06724	8.43792e-12	1.95044e-10	yes
Unigene0005146	68	14	0.8231	0.16745	-2.29734	8.35009e-06	9.18779e-05	yes
Unigene0005152	59	25.5	0.90825	0.3963	-1.1965	0.00871845	0.0487017	yes
Unigene0005156	96.5	21.5	2.40275	0.54435	-2.14208	1.10326e-07	1.60586e-06	yes
Unigene0005158	62	10	0.6386	0.10385	-2.62041	6.86551e-07	8.93761e-06	yes
Unigene0005161	203	52	2.88145	0.7385	-1.96413	1.01085e-10	2.10409e-09	yes
Unigene0005166	83.5	10.5	1.0172	0.1329	-2.93619	3.07184e-09	5.41194e-08	yes
Unigene0005167	33	7	0.42525	0.08655	-2.29671	0.000750933	0.00563225	yes
Unigene0005171	808.5	172	9.5631	2.0497	-2.22207	4.98278e-38	6.12724e-36	yes
Unigene0005178	73	19.5	0.6579	0.1802	-1.86827	7.44096e-06	8.25231e-05	yes
Unigene0005180	152	352.5	0.92025	2.16265	1.2327	1.69256e-08	2.71795e-07	yes
Unigene0005181	6.5	36	0.08945	0.47955	2.42253	0.00222872	0.0148903	yes
Unigene0005182	124.5	52.5	2.36075	0.97275	-1.2791	0.00291016	0.0188951	yes
Unigene0005185	87.5	7.5	1.36095	0.11815	-3.52592	9.3619e-11	1.95764e-09	yes
Unigene0005187	39	7.5	0.6839	0.1333	-2.35911	2.92626e-05	0.000291974	yes
Unigene0005189	493.5	125	7.45265	1.92285	-1.95451	1.11167e-11	2.54593e-10	yes
Unigene0005194	1561.5	246	29.1413	4.6255	-2.65539	5.51448e-29	4.20502e-27	yes
Unigene0005195	108	495.5	1.15575	5.0894	2.13867	0.000106375	0.000951483	yes
Unigene0005204	100	30	2.04265	0.62395	-1.71094	2.93767e-06	3.4689e-05	yes
Unigene0005207	12	99.5	0.16465	1.39295	3.08067	2.25687e-11	5.04381e-10	yes
Unigene0005208	658.5	241	5.7329	2.1131	-1.4399	7.34472e-14	2.06385e-12	yes
Unigene0005210	62	8.5	0.77	0.1113	-2.7904	3.69786e-06	4.29748e-05	yes
Unigene0005211	62.5	193	0.51055	1.57345	1.62381	1.44298e-09	2.64286e-08	yes
Unigene0005214	556.5	1325.5	2.38085	5.68415	1.25547	8.25441e-22	4.17678e-20	yes
Unigene0005219	10	0	0.19435	0.001	-7.60251	0.00182727	0.0124925	yes
Unigene0005220	467.5	42	22.7431	2.0984	-3.43807	6.19533e-25	3.81344e-23	yes
Unigene0005221	249	19.5	10.2401	0.80485	-3.66937	3.65531e-33	3.47688e-31	yes
Unigene0005223	228	89.5	1.5277	0.60235	-1.34269	6.5561e-09	1.11511e-07	yes
Unigene0005226	60	123	1.2671	2.62855	1.05274	0.000358621	0.00289645	yes
Unigene0005229	196.5	53	3.0508	0.8113	-1.91088	1.32897e-07	1.90745e-06	yes
Unigene0005236	86	25.5	1.3633	0.3974	-1.77844	7.84653e-06	8.66514e-05	yes
Unigene0005243	210.5	56.5	5.3525	1.43995	-1.89419	1.24083e-13	3.42655e-12	yes
Unigene0005245	63	16	0.6101	0.15295	-1.99599	5.8008e-06	6.53553e-05	yes
Unigene0005252	62	18.5	0.9066	0.2819	-1.68528	0.00112384	0.00808423	yes
Unigene0005253	62	4	3.1217	0.20685	-3.91568	1.45387e-12	3.60484e-11	yes
Unigene0005254	26	97	0.6875	2.54315	1.88718	5.28001e-06	5.98211e-05	yes
Unigene0005255	150	65	1.72075	0.7337	-1.22978	0.000520718	0.00405508	yes
Unigene0005261	5	29.5	0.1075	0.6483	2.59232	0.000482596	0.00378629	yes
Unigene0005263	673	322.5	3.9121	1.8879	-1.05116	7.24221e-11	1.52786e-09	yes
Unigene0005288	82	512	1.77815	11.0462	2.6351	2.68276e-29	2.08059e-27	yes
Unigene0005294	3	26.5	0.08075	0.71425	3.14489	0.000332437	0.00270699	yes
Unigene0005299	645	173.5	18.118	4.86865	-1.89583	1.66482e-14	4.92128e-13	yes
Unigene0005300	294.5	146	2.92355	1.45065	-1.01102	8.60909e-05	0.000784457	yes
Unigene0005302	44.5	10	0.92385	0.2095	-2.14071	1.8624e-05	0.000192692	yes
Unigene0005304	156.5	74	2.6524	1.26605	-1.06696	0.000585871	0.00451337	yes
Unigene0005307	76.5	37	2.1291	1.0365	-1.03852	0.00659425	0.0384076	yes
Unigene0005312	99	15	1.2356	0.1862	-2.73029	3.55843e-10	6.96105e-09	yes
Unigene0005316	3	25	0.08395	0.67805	3.01379	0.002911	0.0188961	yes
Unigene0005328	27285.5	9020.5	447.533	149.641	-1.58049	9.89584e-40	1.29878e-37	yes
Unigene0005330	601	207.5	5.77545	2.0215	-1.51451	3.67725e-15	1.14923e-13	yes
Unigene0005332	82	40.5	5.19645	2.53165	-1.03745	0.00795227	0.0450439	yes
Unigene0005333	21	3	0.6489	0.0914	-2.82773	0.000793611	0.00591831	yes
Unigene0005334	568.5	65	11.6197	1.3323	-3.12458	5.02804e-23	2.74796e-21	yes
Unigene0005339	148.5	46	1.90665	0.5932	-1.68445	5.3535e-09	9.19442e-08	yes
Unigene0005349	1499	3433	16.2584	37.4941	1.20548	5.23732e-27	3.61958e-25	yes
Unigene0005351	56.5	15	1.0802	0.28275	-1.9337	2.52771e-05	0.000255759	yes
Unigene0005371	24.5	1	0.57075	0.0219	-4.70386	5.70357e-06	6.4313e-05	yes
Unigene0005376	1524.5	637.5	17.9089	7.5612	-1.24399	4.76618e-20	2.14529e-18	yes
Unigene0005377	39.5	15	0.60275	0.2279	-1.40316	0.00421043	0.0260755	yes
Unigene0005386	7.5	31	0.2389	0.9912	2.05277	0.000911621	0.0067061	yes
Unigene0005392	82.5	22.5	0.78465	0.22035	-1.83225	1.10084e-05	0.000118403	yes
Unigene0005399	31.5	83.5	0.3422	0.89765	1.39131	0.00317631	0.0204168	yes
Unigene0005402	39.5	7	1.1957	0.21825	-2.4538	2.62674e-05	0.000264927	yes
Unigene0005404	89.5	34.5	0.6581	0.2568	-1.35766	6.22296e-05	0.000584184	yes
Unigene0005409	18.5	3.5	0.4931	0.0933	-2.40193	0.00521214	0.031313	yes
Unigene0005415	188.5	714.5	1.8671	7.07065	1.92104	7.02957e-17	2.50522e-15	yes
Unigene0005417	2869.5	1060.5	7.794	2.8977	-1.42746	1.59392e-34	1.65446e-32	yes
Unigene0005419	56	449	0.4098	3.2901	3.00514	3.50728e-41	4.91001e-39	yes
Unigene0005420	9	95	0.26435	2.8027	3.4063	8.77428e-16	2.87896e-14	yes
Unigene0005421	1	12.5	0.0298	0.3783	3.66615	0.00511972	0.0308528	yes
Unigene0005424	3558.5	7488.5	16.857	35.5877	1.07803	1.39931e-28	1.04087e-26	yes
Unigene0005425	432	105	12.8702	3.23905	-1.99039	1.81724e-07	2.56377e-06	yes
Unigene0005431	1.5	149.5	0.03375	3.31135	6.61639	1.11783e-23	6.39739e-22	yes
Unigene0005443	0	25	0.001	0.7376	9.52669	2.22176e-05	0.00022699	yes
Unigene0005446	11326.5	2642	72.5658	16.9843	-2.09508	1.3928e-102	1.18819e-99	yes
Unigene0005453	31.5	1	0.7501	0.0257	-4.86724	5.02424e-08	7.64957e-07	yes
Unigene0005456	1064	189.5	8.41405	1.5105	-2.47777	2.8641e-56	7.59099e-54	yes
Unigene0005460	297	32	9.75725	1.0768	-3.17972	3.13715e-24	1.8497e-22	yes
Unigene0005468	549.5	196	9.8614	3.55015	-1.47391	8.10991e-17	2.87709e-15	yes
Unigene0005481	38	8.5	1.2079	0.2646	-2.19062	0.000701989	0.0053048	yes
Unigene0005493	13	0	0.49585	0.001	-8.95376	0.000764115	0.00572044	yes
Unigene0005504	195	29	1.82305	0.26595	-2.77713	5.12133e-13	1.33723e-11	yes
Unigene0005508	44	12.5	1.6439	0.4748	-1.79173	0.000844617	0.00626469	yes
Unigene0005512	53	21.5	0.6702	0.2702	-1.31056	0.00395918	0.0247044	yes
Unigene0005522	2225.5	4983.5	26.5394	60.0292	1.17752	5.37794e-25	3.3178e-23	yes
Unigene0005526	22.5	0	0.7322	0.001	-9.51609	3.93147e-06	4.54575e-05	yes
Unigene0005538	1268.5	187.5	5.5293	0.8277	-2.73992	8.64476e-59	2.47113e-56	yes
Unigene0005547	7014.5	3215.5	44.6985	20.5531	-1.12087	7.79541e-18	2.97216e-16	yes
Unigene0005549	105.5	16	3.1332	0.4649	-2.75264	3.74398e-11	8.17328e-10	yes
Unigene0005557	31	10	0.9403	0.31255	-1.58903	0.00592535	0.0349668	yes
Unigene0005559	3	38	0.05765	0.7272	3.65696	1.71549e-07	2.429e-06	yes
Unigene0005569	12	61.5	0.2961	1.5137	2.35392	8.3928e-05	0.000767298	yes
Unigene0005571	0.5	10.5	0.01805	0.37	4.35745	0.00779369	0.0442835	yes
Unigene0005580	2	165	0.02305	1.90345	6.36771	1.08405e-34	1.1426e-32	yes
Unigene0005584	186	0	1.624	0.001	-10.6653	2.03358e-43	3.12758e-41	yes
Unigene0005585	1	24.5	0.01625	0.3998	4.62077	3.74266e-06	4.34215e-05	yes
Unigene0005586	76	27	0.6218	0.22255	-1.48232	0.000137269	0.00120203	yes
Unigene0005590	23.5	4	0.626	0.1076	-2.54048	0.00063346	0.00483648	yes
Unigene0005597	25.5	0.5	0.62895	0.01155	-5.76698	5.83949e-07	7.66773e-06	yes
Unigene0005599	2144	6390.5	28.0934	83.7648	1.57611	7.18127e-41	9.85134e-39	yes
Unigene0005608	116	55.5	1.22305	0.58535	-1.06311	0.00149357	0.0104185	yes
Unigene0005611	22	4	0.7117	0.1258	-2.50014	0.00876232	0.0489016	yes
Unigene0005625	205	97.5	2.88605	1.37725	-1.06731	3.40472e-05	0.000335483	yes
Unigene0005628	80	2	1.33675	0.0314	-5.41182	6.06064e-17	2.16983e-15	yes
Unigene0005637	1	15	0.0324	0.4956	3.93511	0.00164308	0.0113613	yes
Unigene0005642	84	513	0.60455	3.65755	2.59694	1.76221e-23	9.87815e-22	yes
Unigene0005643	1	36.5	0.0337	1.2074	5.16301	2.55897e-08	4.02983e-07	yes
Unigene0005644	8	163	0.21525	4.38895	4.34979	5.50244e-29	4.20171e-27	yes
Unigene0005673	98.5	19	1.1992	0.2366	-2.34155	8.65014e-07	1.10968e-05	yes
Unigene0005674	421	189.5	10.1768	4.5741	-1.15372	3.0067e-09	5.3006e-08	yes
Unigene0005681	0	14	0.001	0.45605	8.83305	0.000192122	0.00163949	yes
Unigene0005682	390.5	175	1.4455	0.6546	-1.14288	3.5852e-09	6.26985e-08	yes
Unigene0005683	57.5	20	0.85095	0.3059	-1.47601	0.00230397	0.0153442	yes
Unigene0005690	44	18.5	1.92525	0.82485	-1.22284	0.00831997	0.0468303	yes
Unigene0005693	16	0	0.54325	0.001	-9.08547	2.99858e-05	0.000298263	yes
Unigene0005706	99.5	12	1.39405	0.1696	-3.03907	6.64093e-14	1.87478e-12	yes
Unigene0005727	24	78.5	0.2429	0.81565	1.74759	0.000278423	0.00230258	yes
Unigene0005732	669	333	12.2301	6.11075	-1.00101	3.49074e-08	5.39755e-07	yes
Unigene0005737	0	18.5	0.001	1.1538	10.1722	1.75202e-05	0.000182203	yes
Unigene0005745	26	0	1.69065	0.001	-10.7234	7.41437e-08	1.10634e-06	yes
Unigene0005749	153	47.5	2.44315	0.76905	-1.66759	1.81283e-07	2.55886e-06	yes
Unigene0005760	58.5	17	1.1263	0.3261	-1.7882	6.08969e-05	0.000572953	yes
Unigene0005766	320	150.5	3.84845	1.8236	-1.07749	1.87698e-05	0.000193943	yes
Unigene0005767	8677.5	4206.5	112.472	54.9273	-1.03396	3.99531e-27	2.78235e-25	yes
Unigene0005772	14	43	0.4945	1.5404	1.63926	0.00256161	0.0168748	yes
Unigene0005780	6496.5	3113.5	85.5375	41.2114	-1.05352	2.6572e-25	1.66948e-23	yes
Unigene0005792	22.5	52	0.73475	1.7175	1.22498	0.00413561	0.0256645	yes
Unigene0005793	1120	408	10.1016	3.7064	-1.44649	1.85132e-25	1.17397e-23	yes
Unigene0005813	90	237	4.3128	11.5274	1.41837	2.85028e-07	3.91004e-06	yes
Unigene0005819	1165.5	482	11.3734	4.7037	-1.27379	2.29918e-15	7.30678e-14	yes
Unigene0005822	3533.5	1375	32.2259	12.6435	-1.34982	5.35457e-33	5.0492e-31	yes
Unigene0005824	475.5	199.5	11.2087	4.7457	-1.23993	5.03226e-12	1.19043e-10	yes
Unigene0005825	16.5	3	1.12025	0.20085	-2.47963	0.00647782	0.0378102	yes
Unigene0005881	463	35	3.2539	0.244	-3.73722	7.2439e-34	7.19096e-32	yes
Unigene0005896	64.5	31	0.71665	0.3468	-1.04716	0.00380519	0.0238745	yes
Unigene0005897	145	645.5	2.033	9.05465	2.15505	3.02942e-31	2.58842e-29	yes
Unigene0005916	8.5	34.5	0.3226	1.33245	2.04626	0.000593841	0.00456913	yes
Unigene0005917	1066	424	5.7049	2.3093	-1.30475	2.11089e-12	5.15432e-11	yes
Unigene0005923	2	17.5	0.0805	0.71505	3.15098	0.00264192	0.0173495	yes
Unigene0005925	301.5	100.5	2.035	0.6789	-1.58376	7.05973e-13	1.80961e-11	yes
Unigene0005929	712	342.5	5.3397	2.56965	-1.05519	3.1413e-09	5.52892e-08	yes
Unigene0005934	18	79	0.2736	1.2124	2.14773	2.32337e-05	0.000236487	yes
Unigene0005972	28	5.5	1.80005	0.3405	-2.40231	0.00484075	0.0294184	yes
Unigene0005975	581	8.5	23.9876	0.37005	-6.01843	1.16175e-75	5.56395e-73	yes
Unigene0005977	9.5	0	0.46015	0.001	-8.84596	0.00369127	0.0232613	yes
Unigene0005991	68	29	2.7128	1.17535	-1.20669	0.00288636	0.0187575	yes
Unigene0005993	793	316.5	12.8825	5.14355	-1.32458	1.10301e-16	3.8728e-15	yes
Unigene0005996	1451.5	386.5	6.6711	1.77615	-1.90917	8.01175e-24	4.62884e-22	yes
Unigene0005997	48	15	3.7281	1.18145	-1.65788	0.000245571	0.00205199	yes
Unigene0005998	508	174	5.7517	1.98595	-1.53416	1.25854e-13	3.47038e-12	yes
Unigene0005999	2152.5	712	29.3924	9.78145	-1.58732	2.27302e-32	2.06837e-30	yes
Unigene0006000	227.5	83.5	11.6865	4.2639	-1.4546	1.66307e-07	2.35722e-06	yes
Unigene0006002	85	34.5	2.6041	1.06375	-1.29163	0.000102286	0.000918525	yes
Unigene0006007	41	10	2.2138	0.541	-2.03282	9.48837e-05	0.000856635	yes
Unigene0006008	93	26.5	2.9732	0.85005	-1.8064	1.2208e-06	1.53332e-05	yes
Unigene0006010	141.5	46	5.34085	1.725	-1.63047	4.04084e-07	5.40872e-06	yes
Unigene0006011	967.5	373	9.5941	3.7245	-1.3651	5.43287e-21	2.58608e-19	yes
Unigene0006012	54	14.5	4.8816	1.31265	-1.89487	4.48071e-05	0.000432451	yes
Unigene0006013	198.5	68.5	5.5073	1.92235	-1.51847	1.66968e-08	2.68517e-07	yes
Unigene0006018	43	4.5	1.61675	0.1694	-3.25459	6.54197e-08	9.84233e-07	yes
Unigene0006020	29.5	8.5	2.61095	0.74325	-1.81266	0.00390713	0.0244383	yes
Unigene0006025	828	411.5	15.9645	7.9731	-1.00165	2.59427e-11	5.77188e-10	yes
Unigene0006026	1136	438	19.8144	7.67075	-1.36911	3.188e-23	1.75639e-21	yes
Unigene0006027	110.5	46	3.5765	1.5036	-1.25013	0.000118192	0.00104723	yes
Unigene0006028	891.5	404.5	12.6783	5.81235	-1.12516	2.10202e-13	5.68994e-12	yes
Unigene0006031	209.5	83	5.5407	2.2135	-1.32374	2.82343e-08	4.42588e-07	yes
Unigene0006033	389.5	121	12.8143	3.9753	-1.68862	1.69869e-15	5.46524e-14	yes
Unigene0006035	49	19	0.96555	0.3849	-1.32687	0.00494904	0.0299663	yes
Unigene0006067	169	53.5	1.01765	0.3227	-1.65698	3.14443e-09	5.53091e-08	yes
Unigene0006073	5091.5	2431	54.9901	26.4332	-1.05682	8.80413e-26	5.66181e-24	yes
Unigene0006076	80	6.5	1.82605	0.1488	-3.61728	3.06507e-12	7.41129e-11	yes
Unigene0006082	651	159.5	53.7528	13.2053	-2.02522	6.97989e-29	5.30025e-27	yes
Unigene0006083	2822	1368.5	94.2842	45.8409	-1.04038	1.12781e-20	5.27191e-19	yes
Unigene0006088	134.5	28	2.1066	0.44705	-2.23641	1.5646e-11	3.53431e-10	yes
Unigene0006095	12	1	0.7772	0.0699	-3.47492	0.00689171	0.0398975	yes
Unigene0006097	72.5	6	0.9272	0.07195	-3.68781	1.04911e-06	1.33177e-05	yes
Unigene0006113	529	214.5	8.75205	3.588	-1.28644	6.92505e-12	1.61097e-10	yes
Unigene0006123	13.5	0	0.46735	0.001	-8.86836	0.00044633	0.00352557	yes
Unigene0006130	555	2197	11.1344	43.7866	1.97546	2.00594e-22	1.05511e-20	yes
Unigene0006132	30	89	0.6015	1.79635	1.57843	4.59195e-05	0.000442016	yes
Unigene0006140	0	23.5	0.001	1.6585	10.6957	0.00177387	0.0121594	yes
Unigene0006144	2938.5	1353.5	36.4551	16.9052	-1.10865	8.3873e-22	4.23225e-20	yes
Unigene0006150	70.5	1210.5	4.42675	77.5204	4.13026	5.87358e-55	1.45107e-52	yes
Unigene0006152	29.5	7	0.74125	0.17745	-2.06255	0.000772302	0.00577698	yes
Unigene0006158	1098.5	540	28.9427	14.3389	-1.01326	1.21784e-13	3.36668e-12	yes
Unigene0006169	16	0	0.5419	0.001	-9.08188	0.000255655	0.00212713	yes
Unigene0006183	2	16	0.08885	0.71405	3.00658	0.0023465	0.015599	yes
Unigene0006198	1782.5	726	10.3394	4.2407	-1.28578	3.7979e-21	1.82855e-19	yes
Unigene0006212	207.5	34.5	3.0785	0.5115	-2.58942	2.89436e-14	8.39673e-13	yes
Unigene0006214	87	17	1.45575	0.2836	-2.35983	8.47125e-10	1.59103e-08	yes
Unigene0006217	0	18	0.001	0.65655	9.35876	7.3526e-06	8.16593e-05	yes
Unigene0006219	18.5	4	1.35565	0.29095	-2.22014	0.00855133	0.0478759	yes
Unigene0006221	477	187.5	4.72545	1.8924	-1.32023	5.50052e-09	9.42912e-08	yes
Unigene0006232	8	48.5	0.33985	2.1267	2.64565	3.60481e-05	0.000353603	yes
Unigene0006234	131.5	28.5	1.8305	0.41175	-2.1524	3.76433e-07	5.05845e-06	yes
Unigene0006243	8450.5	4078.5	76.8332	37.3428	-1.0409	1.23867e-27	8.85197e-26	yes
Unigene0006258	207.5	95.5	3.9776	1.8661	-1.09187	5.68195e-05	0.000538208	yes
Unigene0006281	7	28	0.14995	0.60755	2.01852	0.00297528	0.0192675	yes
Unigene0006283	267	99	3.89105	1.4894	-1.38543	0.000927138	0.00680467	yes
Unigene0006285	0	14	0.001	0.8006	9.64494	0.000138919	0.00121511	yes
Unigene0006288	33327.5	77434.5	529.867	1229.87	1.2148	4.43365e-33	4.1953e-31	yes
Unigene0006297	177.5	83	4.59985	2.1517	-1.09611	2.08171e-05	0.000213521	yes
Unigene0006305	95	29.5	1.0342	0.3171	-1.70551	3.63674e-05	0.000356351	yes
Unigene0006308	6963.5	3224	40.3878	18.8186	-1.10176	1.39527e-29	1.10244e-27	yes
Unigene0006318	7	83	0.0762	0.92965	3.60882	2.5283e-10	5.03429e-09	yes
Unigene0006325	1	19.5	0.05115	1.0231	4.32207	0.000113431	0.00100816	yes
Unigene0006332	62.5	11	1.32365	0.2396	-2.46582	2.25379e-07	3.13909e-06	yes
Unigene0006338	0	39.5	0.001	1.19245	10.2197	1.11006e-09	2.05727e-08	yes
Unigene0006351	191.5	24.5	4.9087	0.62875	-2.96478	6.62556e-15	2.03799e-13	yes
Unigene0006365	144	63	1.5465	0.69015	-1.16402	0.000312143	0.0025547	yes
Unigene0006384	124	32.5	2.8801	0.7621	-1.91807	1.08976e-07	1.59003e-06	yes
Unigene0006388	0	8.5	0.001	0.5706	9.15634	0.00592908	0.0349812	yes
Unigene0006390	13	1	0.5027	0.0417	-3.59158	0.0053237	0.031871	yes
Unigene0006406	21.5	73.5	1.57735	5.3716	1.76785	6.73673e-06	7.52275e-05	yes
Unigene0006420	72.5	269.5	0.8076	3.0096	1.89786	2.29689e-13	6.18372e-12	yes
Unigene0006434	12.5	1	0.41145	0.0355	-3.53483	0.00575273	0.0341214	yes
Unigene0006440	9	0	0.6452	0.001	-9.3336	0.00456695	0.0279465	yes
Unigene0006442	6.5	32.5	0.18935	0.94305	2.31628	0.000203227	0.0017259	yes
Unigene0006451	1136	553	6.9486	3.3959	-1.03293	3.91268e-14	1.12493e-12	yes
Unigene0006459	5	151.5	0.1815	5.2372	4.85075	1.18819e-06	1.49545e-05	yes
Unigene0006464	59	5	3.21	0.2707	-3.56781	4.79488e-11	1.02865e-09	yes
Unigene0006485	136.5	48	4.687	1.66365	-1.49431	1.62945e-07	2.31317e-06	yes
Unigene0006500	192	60.5	1.6011	0.50975	-1.6512	4.73825e-08	7.24241e-07	yes
Unigene0006507	229.5	53.5	5.09035	1.20945	-2.07341	8.99372e-14	2.51042e-12	yes
Unigene0006535	104.5	41.5	0.9774	0.3927	-1.31552	3.56158e-05	0.000349991	yes
Unigene0006547	92	33	1.79445	0.6402	-1.48695	1.74748e-05	0.000181861	yes
Unigene0006569	57.5	7	1.4561	0.18075	-3.01004	3.14228e-09	5.52892e-08	yes
Unigene0006580	9.5	134.5	0.6717	9.7109	3.85372	1.62919e-16	5.64766e-15	yes
Unigene0006581	58	26.5	0.942	0.4225	-1.15678	0.00847086	0.0475179	yes
Unigene0006587	41.5	12	0.4269	0.12175	-1.80998	0.000517002	0.00402786	yes
Unigene0006594	14091	6262	477.038	212.655	-1.16559	2.58478e-26	1.71059e-24	yes
Unigene0006599	105	26.5	1.826	0.46835	-1.96303	3.3261e-08	5.16198e-07	yes
Unigene0006600	5507	2070	47.5305	17.9944	-1.4013	2.81441e-42	4.1196e-40	yes
Unigene0006603	40	106.5	0.7779	2.09465	1.42905	1.05122e-05	0.000113473	yes
Unigene0006605	0	10	0.001	0.42945	8.74635	0.00268904	0.0176313	yes
Unigene0006614	71.5	20	0.82385	0.235	-1.80972	6.85659e-06	7.65086e-05	yes
Unigene0006636	601.5	8641	4.48125	63.7726	3.83096	2.77311e-99	2.16295e-96	yes
Unigene0006639	17.5	54.5	0.9772	3.1322	1.68045	0.00116554	0.00834465	yes
Unigene0006651	8038	2943	48.3428	17.8711	-1.43568	1.42944e-41	2.03772e-39	yes
Unigene0006661	19	0	0.7585	0.001	-9.56701	4.81818e-06	5.49422e-05	yes
Unigene0006668	10002.5	4117.5	37.3361	15.4428	-1.27364	1.02534e-43	1.59947e-41	yes
Unigene0006673	177	1325.5	9.92745	74.7498	2.91258	5.27741e-49	1.03646e-46	yes
Unigene0006679	11	33	0.59985	1.77425	1.56454	0.00732354	0.041957	yes
Unigene0006707	23	73	0.40155	1.33115	1.72902	0.00586935	0.0347075	yes
Unigene0006709	17	0	0.72195	0.001	-9.49576	1.9656e-05	0.000202563	yes
Unigene0006713	1883	846.5	45.5496	20.3067	-1.16548	4.68667e-07	6.22586e-06	yes
Unigene0006720	2208	635	24.5665	7.0972	-1.79137	3.53506e-50	7.31087e-48	yes
Unigene0006738	100	25.5	1.1291	0.2906	-1.95807	2.72638e-05	0.000273781	yes
Unigene0006740	41	9.5	0.7535	0.1766	-2.09312	0.000598368	0.00459942	yes
Unigene0006741	8	25.5	0.2185	0.70265	1.68517	0.00866775	0.0484432	yes
Unigene0006747	20.5	2	0.8511	0.08655	-3.29772	0.00153809	0.0107031	yes
Unigene0006762	19	2	0.65125	0.0643	-3.34032	0.00258628	0.0170251	yes
Unigene0006764	1450.5	681.5	8.81375	4.1613	-1.08272	3.13674e-14	9.07577e-13	yes
Unigene0006787	383	98.5	3.4004	0.88695	-1.93878	2.64124e-15	8.35496e-14	yes
Unigene0006797	1955	4501	23.1218	53.2129	1.20252	3.64195e-26	2.40149e-24	yes
Unigene0006803	12	0	0.48025	0.001	-8.90764	0.00107767	0.00778807	yes
Unigene0006804	245	113	1.7495	0.80455	-1.12069	0.000510932	0.00398455	yes
Unigene0006837	40.5	140	0.42995	1.46795	1.77156	7.42449e-06	8.23572e-05	yes
Unigene0006838	10.5	0	0.53715	0.001	-9.06918	0.00179281	0.0122754	yes
Unigene0006839	92.5	1	0.9818	0.00995	-6.62459	6.87957e-23	3.7226e-21	yes
Unigene0006846	1002.5	357	7.24935	2.6097	-1.47397	6.83783e-22	3.48257e-20	yes
Unigene0006857	393	129.5	5.66865	1.86985	-1.60008	2.85126e-13	7.61239e-12	yes
Unigene0006873	208.5	27.5	3.3896	0.4567	-2.8918	4.71451e-17	1.69903e-15	yes
Unigene0006882	11.5	0	0.6048	0.001	-9.24031	0.00521585	0.0313284	yes
Unigene0006893	139.5	57	1.88295	0.76115	-1.30674	3.73273e-05	0.000365167	yes
Unigene0006897	1927	7811	38.7287	157.579	2.0246	1.9471e-69	7.75969e-67	yes
Unigene0006901	8	44	0.2398	1.3804	2.52518	0.00263113	0.0172854	yes
Unigene0006907	29	142.5	0.7211	3.47005	2.26669	7.54006e-06	8.35374e-05	yes
Unigene0006909	59	11	0.7551	0.15015	-2.33026	0.000917049	0.00673826	yes
Unigene0006916	18.5	1	0.5454	0.0318	-4.10022	0.000365664	0.00294941	yes
Unigene0006921	1	35	0.0119	0.40955	5.10501	4.01174e-08	6.16473e-07	yes
Unigene0006930	68.5	21	3.0305	0.94045	-1.68813	2.21848e-05	0.00022674	yes
Unigene0006933	26.5	2	0.52185	0.0398	-3.71279	1.56212e-05	0.000164112	yes
Unigene0006941	2868	5995	112.582	235.943	1.06747	1.52362e-17	5.68992e-16	yes
Unigene0006942	25.5	5	0.43585	0.0828	-2.39613	0.00331891	0.0211937	yes
Unigene0006944	195	436	2.6501	5.986	1.17555	5.17802e-08	7.86178e-07	yes
Unigene0006958	43	5	1.33435	0.1632	-3.03142	2.10361e-06	2.54155e-05	yes
Unigene0006959	106.5	30	2.0253	0.5656	-1.84028	2.70393e-06	3.20933e-05	yes
Unigene0006964	393	109.5	3.3879	0.9659	-1.81045	2.68454e-09	4.76496e-08	yes
Unigene0006966	43	11.5	1.96685	0.53275	-1.88436	0.000164052	0.00141724	yes
Unigene0006972	115	440	1.1205	4.3033	1.9413	2.97112e-23	1.64521e-21	yes
Unigene0006990	1	20.5	0.03655	0.76265	4.38308	5.41516e-05	0.000514813	yes
Unigene0007014	33.5	109	0.45165	1.4949	1.72677	2.17132e-06	2.61296e-05	yes
Unigene0007029	26	5	0.6727	0.1252	-2.42573	0.00158506	0.0109977	yes
Unigene0007031	236	106	5.70855	2.5449	-1.16552	0.000168312	0.00145114	yes
Unigene0007034	838.5	222.5	7.33115	1.96345	-1.90065	8.54921e-30	6.79432e-28	yes
Unigene0007039	16.5	2	0.45175	0.05725	-2.98018	0.00327871	0.0209713	yes
Unigene0007044	4740	2215	50.9535	23.8478	-1.09533	2.38021e-25	1.50236e-23	yes
Unigene0007062	15822.5	7090.5	97.2584	43.6538	-1.15572	5.67857e-33	5.34549e-31	yes
Unigene0007063	3	33.5	0.11515	1.32475	3.52413	1.04036e-05	0.000112478	yes
Unigene0007071	5	82	0.1123	1.86995	4.05757	7.65863e-15	2.33862e-13	yes
Unigene0007081	6	68	0.1615	1.87345	3.53609	1.19555e-09	2.20672e-08	yes
Unigene0007089	62.5	18	0.69815	0.2058	-1.76229	0.000989526	0.00720637	yes
Unigene0007092	1.5	26	0.03645	0.6401	4.13431	7.73055e-06	8.5509e-05	yes
Unigene0007109	95	226.5	2.2769	5.44475	1.25779	6.04078e-08	9.1235e-07	yes
Unigene0007115	2192.5	833	12.7874	4.899	-1.38417	2.20374e-29	1.72132e-27	yes
Unigene0007116	4421.5	1552	30.75	10.8465	-1.50336	4.67721e-46	8.23762e-44	yes
Unigene0007129	1099	2344	5.45375	11.6822	1.09899	4.38423e-22	2.26462e-20	yes
Unigene0007134	143.5	68.5	2.6161	1.2581	-1.05617	0.000105789	0.000946397	yes
Unigene0007136	62	30	1.0848	0.52615	-1.04388	0.00440373	0.0271065	yes
Unigene0007146	471	131	7.0406	2.00195	-1.81429	5.97031e-13	1.5456e-11	yes
Unigene0007151	265.5	95	3.9693	1.4388	-1.46402	2.6353e-07	3.62788e-06	yes
Unigene0007158	10.5	0	0.76225	0.001	-9.57412	0.00130204	0.00921791	yes
Unigene0007169	1	15.5	0.0413	0.66425	4.00751	0.00171805	0.0118153	yes
Unigene0007175	26	99	0.34405	1.3176	1.93722	2.51625e-06	2.99961e-05	yes
Unigene0007190	19.5	1	1.07045	0.0515	-4.3775	0.000258004	0.00214472	yes
Unigene0007195	31	4	0.6356	0.0857	-2.89075	5.33169e-05	0.000507407	yes
Unigene0007196	12.5	0.5	0.6879	0.02585	-4.73396	0.00251868	0.0166201	yes
Unigene0007208	708	268	5.761	2.1916	-1.39433	7.84307e-15	2.3896e-13	yes
Unigene0007215	15	1	0.6519	0.04085	-3.99624	0.00144637	0.0101242	yes
Unigene0007247	1822.5	508	27.1661	7.62815	-1.8324	2.97981e-45	5.00589e-43	yes
Unigene0007250	140	64.5	2.4717	1.1307	-1.12829	0.000353088	0.0028564	yes
Unigene0007252	56	15	1.49535	0.417	-1.84236	0.00115657	0.00828586	yes
Unigene0007254	30	7	0.95635	0.22275	-2.10211	0.00133088	0.00939654	yes
Unigene0007267	19.5	2	0.2698	0.02795	-3.27097	0.000420579	0.00334441	yes
Unigene0007279	30.5	10	1.9506	0.6278	-1.63554	0.00715476	0.0411664	yes
Unigene0007285	13787	5607.5	417.482	171.122	-1.28669	2.65837e-36	3.01124e-34	yes
Unigene0007302	687	230.5	3.314	1.12075	-1.56411	9.34122e-19	3.84045e-17	yes
Unigene0007314	47	20.5	0.94785	0.4207	-1.17187	0.00873193	0.0487596	yes
Unigene0007365	13.5	1.5	0.7323	0.0764	-3.26079	0.00782062	0.044418	yes
Unigene0007378	2238	7336.5	60.0577	197.681	1.71875	4.55815e-39	5.84193e-37	yes
Unigene0007379	1229	512.5	11.473	4.812	-1.25353	1.67483e-21	8.25292e-20	yes
Unigene0007392	78	7	0.8533	0.08035	-3.40868	1.59728e-10	3.25162e-09	yes
Unigene0007395	56.5	7.5	0.8196	0.1113	-2.88047	4.99396e-08	7.60771e-07	yes
Unigene0007402	53	9	3.10655	0.55735	-2.47866	6.92588e-05	0.000645178	yes
Unigene0007408	475.5	176	5.36645	2.0063	-1.41943	2.24808e-11	5.02625e-10	yes
Unigene0007409	187	44	2.6397	0.62345	-2.08203	1.24155e-10	2.55603e-09	yes
Unigene0007413	18	2	0.84015	0.09425	-3.15608	0.000793959	0.0059187	yes
Unigene0007414	2.5	20.5	0.03275	0.2788	3.08966	0.00378463	0.0237564	yes
Unigene0007424	15532	7323.5	86.0131	40.7422	-1.07803	7.16636e-28	5.17551e-26	yes
Unigene0007435	64.5	3.5	0.8984	0.0487	-4.20536	8.68095e-14	2.4256e-12	yes
Unigene0007442	1150	351.5	12.2569	3.7727	-1.69993	6.27821e-34	6.25507e-32	yes
Unigene0007444	3	20.5	0.1306	0.86655	2.73013	0.00485908	0.0295068	yes
Unigene0007456	0	11	0.001	0.52755	9.04316	0.00166303	0.0114774	yes
Unigene0007457	68	148.5	1.5486	3.4058	1.13703	1.82022e-05	0.000188649	yes
Unigene0007466	7	87	0.2512	3.1716	3.6583	5.20821e-14	1.48412e-12	yes
Unigene0007470	14	2	0.7717	0.11125	-2.79423	0.00699089	0.0403647	yes
Unigene0007472	452	46.5	4.56615	0.47655	-3.26028	5.48967e-43	8.30264e-41	yes
Unigene0007478	758.5	1550.5	5.55995	11.4122	1.03743	8.00516e-16	2.63769e-14	yes
Unigene0007479	109	247.5	2.46045	5.6331	1.19501	0.00177676	0.0121762	yes
Unigene0007480	417.5	962	8.9535	20.5937	1.20168	1.06923e-10	2.21716e-09	yes
Unigene0007484	14	1	0.70955	0.04765	-3.89636	0.00264901	0.0173897	yes
Unigene0007485	274	124.5	4.0849	1.87075	-1.12668	8.35897e-08	1.23748e-06	yes
Unigene0007493	16.5	1	0.4292	0.02435	-4.13966	0.0023357	0.0155328	yes
Unigene0007499	722.5	1467	6.35345	12.921	1.02411	2.67555e-13	7.1678e-12	yes
Unigene0007508	182.5	75	1.37865	0.5746	-1.26263	1.39516e-06	1.73436e-05	yes
Unigene0007510	12	0	0.6969	0.001	-9.44481	0.000676171	0.00512958	yes
Unigene0007524	4028	1344	17.5021	5.887	-1.57192	1.86005e-43	2.86879e-41	yes
Unigene0007527	2864.5	809.5	86.8681	24.8878	-1.80339	7.07156e-35	7.55563e-33	yes
Unigene0007528	316.5	52.5	4.62075	0.75505	-2.61348	2.15412e-14	6.29608e-13	yes
Unigene0007530	11.5	36	0.3858	1.201	1.63831	0.00298666	0.0193251	yes
Unigene0007535	35490	7267	411.129	84.4057	-2.28418	1.65796e-134	2.58633e-131	yes
Unigene0007537	0	11	0.001	0.46245	8.85315	0.00128045	0.00907922	yes
Unigene0007548	49.5	0	0.8145	0.001	-9.66977	2.74303e-13	7.3306e-12	yes
Unigene0007553	96.5	23	1.1964	0.2859	-2.06512	6.22761e-08	9.39009e-07	yes
Unigene0007559	1287	3266	13.112	33.3157	1.34532	6.6135e-32	5.87129e-30	yes
Unigene0007562	98790.5	25622.5	1833.53	482.008	-1.92749	6.88133e-54	1.6551e-51	yes
Unigene0007563	3978	1236.5	37.2336	11.6494	-1.67636	1.84937e-53	4.33356e-51	yes
Unigene0007574	128.5	42.5	11.2671	3.78395	-1.57415	4.62648e-07	6.15039e-06	yes
Unigene0007575	546	191.5	8.5308	3.04635	-1.4856	1.11498e-11	2.55137e-10	yes
Unigene0007576	98	27.5	3.20555	0.89	-1.84869	2.85147e-06	3.37344e-05	yes
Unigene0007579	8	52.5	0.3183	2.06245	2.6959	9.75742e-07	1.24326e-05	yes
Unigene0007582	279	107.5	3.86815	1.48855	-1.37774	6.97854e-10	1.32527e-08	yes
Unigene0007588	22.5	3	0.98935	0.1238	-2.99847	0.00170758	0.0117537	yes
Unigene0007595	143.5	21	2.03645	0.2995	-2.76543	7.17152e-11	1.51353e-09	yes
Unigene0007602	6	46.5	0.12315	0.9867	3.00219	3.33775e-05	0.0003293	yes
Unigene0007604	35.5	96.5	0.90295	2.5623	1.50472	0.00650376	0.0379412	yes
Unigene0007605	7.5	27.5	0.4343	1.5909	1.87308	0.00364036	0.0229986	yes
Unigene0007612	3	17.5	0.05975	0.3521	2.55897	0.00436298	0.026889	yes
Unigene0007617	8274.5	2976.5	21.3505	7.7338	-1.46502	6.43222e-42	9.31529e-40	yes
Unigene0007618	47	18	2.23925	0.83845	-1.41722	0.00477455	0.0290614	yes
Unigene0007621	395	138.5	8.5628	3.0526	-1.48804	3.10104e-11	6.84913e-10	yes
Unigene0007623	148.5	404.5	1.1895	3.23485	1.44334	3.49002e-09	6.1132e-08	yes
Unigene0007624	726	326.5	23.5885	10.6858	-1.14239	9.82606e-13	2.48487e-11	yes
Unigene0007627	145	37	5.39475	1.37845	-1.96851	1.61055e-10	3.27741e-09	yes
Unigene0007630	62	21	3.5754	1.26695	-1.49675	0.0064669	0.0377545	yes
Unigene0007632	1556.5	714	40.7124	18.6867	-1.12346	1.00189e-15	3.26575e-14	yes
Unigene0007633	194	94	3.67555	1.7976	-1.03189	1.29756e-05	0.000137856	yes
Unigene0007655	76	36	3.5555	1.69645	-1.06753	0.0014848	0.0103667	yes
Unigene0007671	2875.5	862	27.3188	8.1979	-1.73657	9.23238e-46	1.60022e-43	yes
Unigene0007676	724.5	257.5	3.95175	1.42135	-1.47523	1.30704e-16	4.5657e-15	yes
Unigene0007685	107134	49325.5	630.255	293.008	-1.105	2.31867e-28	1.69926e-26	yes
Unigene0007690	242.5	97.5	1.67265	0.6833	-1.29154	2.94113e-06	3.472e-05	yes
Unigene0007692	43.5	7	2.0381	0.34695	-2.55443	0.00119589	0.00853393	yes
Unigene0007694	559	261.5	5.1054	2.40365	-1.0868	4.33188e-11	9.35939e-10	yes
Unigene0007699	17	53.5	0.42975	1.3477	1.64893	0.000208963	0.00176746	yes
Unigene0007701	283	56	2.9107	0.5915	-2.29892	1.78346e-08	2.85915e-07	yes
Unigene0007707	58.5	23.5	1.56655	0.6351	-1.30254	0.00810196	0.0457547	yes
Unigene0007714	99.5	507.5	1.1793	6.0509	2.35922	1.49777e-28	1.11259e-26	yes
Unigene0007726	269.5	31.5	19.3094	2.28395	-3.0797	1.61904e-21	7.99969e-20	yes
Unigene0007729	153.5	17.5	1.27085	0.1517	-3.0665	3.02498e-10	5.95592e-09	yes
Unigene0007730	55.5	11	1.44155	0.29725	-2.27787	4.97058e-05	0.000475028	yes
Unigene0007733	1403	643.5	17.5321	8.12275	-1.10995	7.66076e-14	2.15156e-12	yes
Unigene0007737	177.5	55	2.21765	0.69925	-1.66515	4.02332e-07	5.38659e-06	yes
Unigene0007743	23	197	0.7795	6.64475	3.09159	3.67799e-21	1.77238e-19	yes
Unigene0007744	788.5	2823.5	3.94495	14.1131	1.83896	5.9073e-45	9.80324e-43	yes
Unigene0007745	76	610	0.7132	5.72145	3.004	2.12244e-45	3.58764e-43	yes
Unigene0007747	2636	1105	16.3221	6.8868	-1.24492	3.8116e-26	2.5073e-24	yes
Unigene0007757	3.5	19	0.1061	0.57575	2.44002	0.0063835	0.0373275	yes
Unigene0007760	5	39	0.2182	1.67615	2.94143	1.04313e-05	0.000112711	yes
Unigene0007773	77	17	1.05895	0.2311	-2.19605	1.1412e-07	1.65534e-06	yes
Unigene0007774	14.5	1	0.5865	0.03795	-3.94996	0.00237323	0.0157632	yes
Unigene0007789	46	20	1.53495	0.6711	-1.19359	0.00558328	0.0332536	yes
Unigene0007797	2711	1019	28.4588	10.7867	-1.39961	3.15677e-23	1.7427e-21	yes
Unigene0007811	251	1515	4.3011	25.9639	2.59373	8.22819e-59	2.36444e-56	yes
Unigene0007818	369.5	134.5	1.51635	0.55295	-1.45538	1.24845e-10	2.56927e-09	yes
Unigene0007820	4791	1462	55.6159	17.0791	-1.70326	1.59447e-18	6.4821e-17	yes
Unigene0007827	38	14.5	0.8876	0.3411	-1.37971	0.00435433	0.0268448	yes
Unigene0007829	26.5	6	1.02075	0.23345	-2.12844	0.00191766	0.0130386	yes
Unigene0007832	50.5	23	0.5534	0.25365	-1.12548	0.00561709	0.0334331	yes
Unigene0007835	940	256.5	5.54575	1.5396	-1.84883	4.69765e-16	1.57255e-14	yes
Unigene0007839	10491.5	763	189.309	13.7683	-3.78132	1.4136e-182	5.9369e-179	yes
Unigene0007859	264.5	110.5	4.36625	1.8477	-1.24066	6.65851e-08	1.00039e-06	yes
Unigene0007866	679.5	160	15.4748	3.70145	-2.06376	5.72184e-23	3.11467e-21	yes
Unigene0007872	2410.5	5608	23.2269	54.1951	1.22236	2.7055e-31	2.32622e-29	yes
Unigene0007889	12	135	0.17895	2.03815	3.50963	4.97333e-13	1.29921e-11	yes
Unigene0007893	10	33.5	0.15365	0.5225	1.76578	0.0035675	0.0226013	yes
Unigene0007902	905	5461.5	8.89085	53.7672	2.59633	1.79157e-117	2.08119e-114	yes
Unigene0007913	30	6	0.49945	0.1008	-2.30884	0.000303018	0.00248598	yes
Unigene0008085	199.5	96	8.59265	4.21335	-1.02814	0.00060704	0.00465363	yes
Unigene0008107	185.5	544	6.14225	18.5403	1.59383	8.3442e-07	1.07245e-05	yes
Unigene0008118	18	0	0.7415	0.001	-9.5343	7.1261e-06	7.92889e-05	yes
Unigene0008139	0	13	0.001	0.62565	9.28921	0.000331263	0.00269824	yes
Unigene0008206	8.5	0	0.3571	0.001	-8.48018	0.0085374	0.0478175	yes
Unigene0008210	0	10.5	0.001	0.57255	9.16126	0.00491787	0.0297976	yes
Unigene0008252	8	0	0.2635	0.001	-8.04166	0.00715179	0.0411664	yes
Unigene0008354	24.5	3.5	1.01125	0.14755	-2.77686	0.00170613	0.0117467	yes
Unigene0008376	25	4	0.46145	0.07195	-2.68111	0.000510407	0.00398103	yes
Unigene0008476	2	30	0.0672	1.03095	3.93937	6.06469e-06	6.81878e-05	yes
Unigene0008578	13.5	0	0.56585	0.001	-9.14428	0.000173837	0.00149279	yes
Unigene0008592	2	26.5	0.06985	0.93985	3.7501	8.08649e-06	8.91031e-05	yes
Unigene0008602	42	0	0.76825	0.001	-9.58543	1.7755e-11	3.99419e-10	yes
Unigene0008609	0	8.5	0.001	0.4227	8.72349	0.00529107	0.0316965	yes
Unigene0008612	0	15	0.001	0.7665	9.58214	7.26877e-05	0.000673444	yes
Unigene0008694	70	7	0.90575	0.0932	-3.28071	1.6719e-11	3.76889e-10	yes
Unigene0008887	2.5	19.5	0.08715	0.69465	2.99471	0.00341749	0.0217544	yes
Unigene0008924	3	48	0.0645	1.02405	3.98884	1.47526e-09	2.69836e-08	yes
Unigene0008948	10	0	0.57005	0.001	-9.15494	0.0020481	0.0138205	yes
Unigene0008955	96.5	40.5	3.8543	1.62575	-1.24536	7.02066e-05	0.000652672	yes
Unigene0008956	63.5	6	1.94675	0.17695	-3.45965	2.7612e-09	4.89308e-08	yes
Unigene0009124	503.5	77.5	8.42135	1.3074	-2.68735	1.33216e-16	4.6475e-15	yes
Unigene0009163	58.5	7.5	0.8836	0.11475	-2.9449	9.29989e-08	1.3664e-06	yes
Unigene0009172	1.5	14	0.0704	0.6592	3.22707	0.00365309	0.0230527	yes
Unigene0009196	5.5	60	0.3845	4.2941	3.4813	2.33707e-09	4.16992e-08	yes
Unigene0009231	41.5	5	0.49385	0.0609	-3.01956	6.07876e-07	7.96468e-06	yes
Unigene0009249	70	17	1.184	0.2863	-2.04807	2.69858e-05	0.000271289	yes
Unigene0009274	9	0	0.61665	0.001	-9.26831	0.008907	0.0496027	yes
Unigene0009278	84	27	2.6403	0.86725	-1.60618	4.27633e-05	0.000414117	yes
Unigene0009285	9	0	0.414	0.001	-8.69349	0.00399803	0.0249254	yes
Unigene0009297	8.5	0	0.3533	0.001	-8.46475	0.00582835	0.0345062	yes
Unigene0009300	3	17.5	0.09345	0.5607	2.58496	0.00567261	0.0337158	yes
Unigene0009332	35	7	0.43775	0.09095	-2.26696	0.000333927	0.0027167	yes
Unigene0009367	0	46.5	0.001	1.1313	10.1438	1.37326e-12	3.41271e-11	yes
Unigene0009398	0	12.5	0.001	0.61235	9.25821	0.000911102	0.00670409	yes
Unigene0009428	0	11.5	0.001	0.5819	9.18463	0.00516208	0.0310664	yes
Unigene0009439	15	0	0.43615	0.001	-8.76868	6.21658e-05	0.000583685	yes
Unigene0009440	21.5	0	0.76745	0.001	-9.58393	1.7519e-05	0.000182203	yes
Unigene0009441	1	16.5	0.1042	1.68055	4.01151	0.000981657	0.00715479	yes
Unigene0009442	26	2	0.51065	0.03685	-3.7926	9.07909e-05	0.000822875	yes
Unigene0009546	225	32.5	2.66065	0.38565	-2.78641	2.5613e-20	1.16632e-18	yes
Unigene0009577	28	192.5	0.7459	5.00775	2.74711	2.02948e-09	3.65574e-08	yes
Unigene0009588	15.5	69.5	0.19005	0.85775	2.17418	1.3944e-06	1.73436e-05	yes
Unigene0009679	8.5	0	0.4726	0.001	-8.88448	0.00583057	0.034512	yes
Unigene0009695	28	7	1.0106	0.25215	-2.00286	0.00421417	0.0260956	yes
Unigene0009737	63	12.5	2.15855	0.43305	-2.31746	3.18652e-06	3.7479e-05	yes
Unigene0009794	14.5	0	0.5368	0.001	-9.06824	0.000614158	0.00470423	yes
Unigene0009802	29	2	1.69505	0.118	-3.84447	1.86512e-06	2.27252e-05	yes
Unigene0009873	0	9	0.001	0.3929	8.61802	0.00482173	0.0293159	yes
Unigene0009883	16.5	95.5	0.4407	2.45885	2.48011	0.000321996	0.00262824	yes
Unigene0009904	1	17.5	0.0457	0.8149	4.15636	0.000316189	0.00258381	yes
Unigene0009951	9.5	0	0.68335	0.001	-9.41648	0.00571624	0.0339271	yes
Unigene0009955	98.5	1	2.62645	0.02875	-6.51341	5.44035e-22	2.79428e-20	yes
Unigene0009986	0.5	28.5	0.0162	0.92755	5.83936	5.06716e-08	7.70632e-07	yes
Unigene0010003	11	0	0.67765	0.001	-9.4044	0.00224127	0.0149668	yes
Unigene0010018	1288	404	33.1576	10.5259	-1.65541	1.57999e-21	7.82796e-20	yes
Unigene0010038	12	0	0.4135	0.001	-8.69174	0.0010919	0.00787721	yes
Unigene0010054	38.5	0	0.9567	0.001	-9.90192	3.41616e-10	6.69475e-09	yes
Unigene0010092	679.5	120.5	18.8775	3.30245	-2.51506	1.04351e-22	5.58015e-21	yes
Unigene0010095	11	0	0.8368	0.001	-9.70874	0.00119156	0.00850862	yes
Unigene0010178	31	5	0.98165	0.16195	-2.59966	7.36094e-05	0.000681289	yes
Unigene0010181	16	1	0.53425	0.03135	-4.09098	0.000972125	0.00709194	yes
Unigene0010243	29.5	4.5	1.1482	0.1808	-2.66691	9.88377e-05	0.000889458	yes
Unigene0010278	1	12	0.09185	1.0892	3.56785	0.00777079	0.044175	yes
Unigene0010302	0	12.5	0.001	0.44895	8.81041	0.0035243	0.0223567	yes
Unigene0010361	17.5	3.5	0.7342	0.1496	-2.29506	0.00725828	0.0416443	yes
Unigene0010395	34.5	0	0.7415	0.001	-9.5343	1.87727e-10	3.79612e-09	yes
Unigene0010463	33	9	0.9314	0.2583	-1.85035	0.000997624	0.0072576	yes
Unigene0010479	8	0	0.57525	0.001	-9.16805	0.00804891	0.0454969	yes
Unigene0010495	1.5	13.5	0.0704	0.6584	3.22532	0.00784391	0.0445325	yes
Unigene0010520	112.5	54.5	9.6235	4.77015	-1.01253	0.00318169	0.0204429	yes
Unigene0010583	11	0	0.3966	0.001	-8.63154	0.00227101	0.0151455	yes
Unigene0010585	14.5	0	0.3527	0.001	-8.4623	0.00010428	0.000934275	yes
Unigene0010590	79	27	0.66045	0.2297	-1.5237	5.53756e-05	0.000525534	yes
Unigene0010598	0	8.5	0.001	0.4492	8.81121	0.00524204	0.031458	yes
Unigene0010618	13.5	0.5	0.38745	0.0135	-4.84298	0.000976458	0.00711975	yes
Unigene0010630	3	25.5	0.0957	0.8098	3.08097	9.70763e-05	0.000874471	yes
Unigene0010645	33	8.5	1.21415	0.30925	-1.9731	0.000734413	0.00551547	yes
Unigene0010658	10.5	0	0.4669	0.001	-8.86697	0.00151838	0.0105713	yes
Unigene0010671	3	50	0.0986	1.65675	4.07062	4.07854e-09	7.0985e-08	yes
Unigene0010701	8	56.5	0.1303	0.89675	2.78287	5.90918e-05	0.000557603	yes
Unigene0010770	43.5	9	0.74405	0.15175	-2.2937	2.24998e-05	0.000229659	yes
Unigene0010774	1943.5	11407.5	22.4876	132.244	2.55599	5.01394e-138	8.29549e-135	yes
Unigene0010793	8.5	0	0.39665	0.001	-8.63172	0.00842102	0.0473113	yes
Unigene0010798	50.5	7.5	2.58825	0.37875	-2.77266	7.33725e-07	9.50639e-06	yes
Unigene0010880	51.5	21	0.918	0.38315	-1.26058	0.00752947	0.0430194	yes
Unigene0010885	17.5	0	0.5779	0.001	-9.17468	1.37916e-05	0.000145788	yes
Unigene0010975	81.5	37	3.85335	1.76655	-1.12518	0.00118813	0.00848748	yes
Unigene0010995	7	26	0.21505	0.8225	1.93534	0.00817326	0.0460995	yes
Unigene0011022	17	0	0.57745	0.001	-9.17355	2.91963e-05	0.000291472	yes
Unigene0011055	11	0.5	0.63655	0.02725	-4.54595	0.00845038	0.0474323	yes
Unigene0011118	0.5	14	0.0125	0.3541	4.82416	0.000643423	0.004905	yes
Unigene0011125	3.5	20	0.0331	0.1952	2.56005	0.00446315	0.0274136	yes
Unigene0011142	272	638	3.17955	7.4977	1.23763	1.67278e-09	3.04029e-08	yes
Unigene0011168	34.5	3	0.652	0.06125	-3.41209	1.59491e-05	0.00016733	yes
Unigene0011192	412	1150	9.37585	26.4798	1.49787	4.68859e-10	9.04869e-09	yes
Unigene0011196	30.5	3	0.8535	0.09055	-3.2366	0.000148706	0.00129387	yes
Unigene0011241	454	19	12.435	0.54225	-4.5193	1.94493e-32	1.77871e-30	yes
Unigene0011292	446	157.5	12.8834	4.5629	-1.49748	1.70118e-13	4.63479e-12	yes
Unigene0011314	16	0.5	0.465	0.0157	-4.88839	0.000195456	0.00166638	yes
Unigene0011336	11	0.5	0.27875	0.0119	-4.54994	0.00684045	0.0396849	yes
Unigene0011338	15.5	0.5	0.53505	0.0162	-5.04561	0.000252998	0.00210824	yes
Unigene0011343	112.5	23	1.88275	0.38225	-2.30025	3.42781e-08	5.30476e-07	yes
Unigene0011410	30.5	9	0.33195	0.0982	-1.75717	0.00451327	0.0276654	yes
Unigene0011455	159.5	72.5	5.2631	2.41785	-1.12219	1.60301e-05	0.000168148	yes
Unigene0011473	54.5	0	1.04355	0.001	-10.0273	1.28152e-12	3.19199e-11	yes
Unigene0011497	47.5	18.5	0.63855	0.25335	-1.33367	0.00317149	0.0203882	yes
Unigene0011530	2363	919	29.9414	11.6796	-1.35816	1.71875e-29	1.34828e-27	yes
Unigene0011549	18.5	1.5	0.6088	0.04635	-3.71533	0.000569941	0.00440635	yes
Unigene0011688	1	22	0.03225	0.6759	4.38944	0.00253566	0.01672	yes
Unigene0011718	12	0	0.5956	0.001	-9.2182	0.00046246	0.00364349	yes
Unigene0011749	0.5	13	0.0216	0.5805	4.74819	0.00154016	0.0107134	yes
Unigene0011798	0	8.5	0.001	0.7088	9.46923	0.00593311	0.0349998	yes
Unigene0011802	31.5	9.5	1.19365	0.3703	-1.68861	0.00544927	0.0325508	yes
Unigene0011889	9	0	0.3641	0.001	-8.50819	0.00457012	0.0279574	yes
Unigene0011893	0	12.5	0.001	1.0536	10.0411	0.00178017	0.012198	yes
Unigene0011930	2	14	0.1047	0.7289	2.79946	0.0075083	0.0429165	yes
Unigene0011982	8.5	0	0.4781	0.001	-8.90117	0.0084234	0.0473177	yes
Unigene0012054	0	10	0.001	0.56725	9.14784	0.00246707	0.0163128	yes
Unigene0012080	653	317.5	9.5469	4.66345	-1.03363	4.39196e-11	9.47072e-10	yes
Unigene0012130	11	0	0.54615	0.001	-9.09315	0.00303013	0.0195832	yes
Unigene0012131	25	0	0.6518	0.001	-9.34829	6.75665e-08	1.01346e-06	yes
Unigene0012189	0	16	0.001	0.7256	9.50303	0.000743128	0.00557786	yes
Unigene0012245	21	0	0.5664	0.001	-9.14568	1.35525e-05	0.000143511	yes
Unigene0012288	0	90	0.001	5.21805	12.3493	1.08627e-14	3.26766e-13	yes
Unigene0012358	15	37.5	1.2583	3.14775	1.32285	0.00668082	0.0388621	yes
Unigene0012407	8.5	28.5	0.34055	1.1379	1.74044	0.0042279	0.0261696	yes
Unigene0012420	5	56.5	0.1538	1.68665	3.45503	1.28434e-06	1.60757e-05	yes
Unigene0012450	15	315.5	1.1177	23.7048	4.40657	1.11001e-39	1.45334e-37	yes
Unigene0012472	14	0	0.6459	0.001	-9.33517	0.000132849	0.00116687	yes
Unigene0012475	36	8.5	0.481	0.11885	-2.01689	0.00171029	0.0117709	yes
Unigene0012478	16	135	1.5068	12.9218	3.10025	5.99218e-10	1.14432e-08	yes
Unigene0012518	55	11.5	2.5445	0.5549	-2.19708	4.51721e-05	0.000435589	yes
Unigene0012560	68.5	19	2.4541	0.6941	-1.82198	4.60522e-05	0.000442981	yes
Unigene0012571	11.5	0	0.53095	0.001	-9.05243	0.000671893	0.00509979	yes
Unigene0012609	42	14	0.4812	0.16515	-1.54286	0.00285259	0.0185699	yes
Unigene0012612	14.5	0.5	0.45385	0.01685	-4.7514	0.00188567	0.0128403	yes
Unigene0012663	147.5	56	2.54575	0.9906	-1.36172	7.92033e-05	0.000727392	yes
Unigene0012690	17	0	0.3311	0.001	-8.37112	1.58327e-05	0.000166237	yes
Unigene0012699	698.5	318.5	32.3206	15.0788	-1.09993	4.87898e-06	5.55542e-05	yes
Unigene0012701	3	42.5	0.066	0.9467	3.84237	1.30144e-07	1.87137e-06	yes
Unigene0012723	6	35	0.1881	1.09385	2.53984	0.00352478	0.0223567	yes
Unigene0012762	5161	2417	154.544	72.8183	-1.08565	2.40425e-27	1.69159e-25	yes
Unigene0012768	18.5	3	0.6311	0.1081	-2.5455	0.00443494	0.027274	yes
Unigene0012798	66	720	1.00825	11.1355	3.46523	1.09213e-55	2.81263e-53	yes
Unigene0012804	95.5	7	1.1854	0.09385	-3.65887	9.80696e-08	1.43742e-06	yes
Unigene0012832	23.5	0	0.56325	0.001	-9.13763	3.83862e-07	5.15321e-06	yes
Unigene0012844	10	0.5	0.249	0.01345	-4.21047	0.00794996	0.0450355	yes
Unigene0012850	347.5	50	3.56085	0.504	-2.82073	1.19311e-20	5.55813e-19	yes
Unigene0012852	0	8.5	0.001	0.4207	8.71665	0.00487742	0.0295951	yes
Unigene0012854	24	2.5	1.29855	0.14605	-3.15237	0.00035153	0.00284464	yes
Unigene0012860	191.5	79.5	1.50145	0.62935	-1.25442	3.18508e-07	4.33664e-06	yes
Unigene0012875	8.5	0	0.27785	0.001	-8.11816	0.00685273	0.0397224	yes
Unigene0012876	54	8	0.99855	0.14155	-2.81852	3.43842e-06	4.01822e-05	yes
Unigene0012884	18	1	0.7556	0.04525	-4.06163	0.000371962	0.0029949	yes
Unigene0012982	83.5	27	0.9275	0.3035	-1.61165	5.08025e-06	5.76776e-05	yes
Unigene0012983	10.5	0	0.50885	0.001	-8.9911	0.00151801	0.0105701	yes
Unigene0012999	11.5	0.5	0.8514	0.0348	-4.61268	0.00369792	0.0232925	yes
Unigene0013024	930	380	25.8893	10.6618	-1.2799	1.77283e-17	6.58455e-16	yes
Unigene0013075	10	61	0.7589	4.6354	2.61071	2.03547e-06	2.46414e-05	yes
Unigene0013077	207	100.5	7.66	3.75395	-1.02893	1.85251e-05	0.000191741	yes
Unigene0013078	60	22.5	4.13105	1.5743	-1.3918	0.00213128	0.0143076	yes
Unigene0013084	25	0	0.7628	0.001	-9.57516	5.45052e-08	8.25944e-07	yes
Unigene0013085	32	8.5	0.61105	0.16705	-1.87101	0.00193055	0.0131132	yes
Unigene0013105	1695	599	18.665	6.67855	-1.48272	2.59974e-22	1.35829e-20	yes
Unigene0013110	287	55	5.22575	0.99295	-2.39585	4.97454e-20	2.23723e-18	yes
Unigene0013140	19	2	0.8039	0.08535	-3.23555	0.000780871	0.00583308	yes
Unigene0013184	0	17	0.001	0.3533	8.46475	1.60831e-05	0.000168574	yes
Unigene0013194	13.5	1	0.40415	0.0281	-3.84625	0.00293353	0.0190242	yes
Unigene0013202	4	27	0.12985	0.89485	2.7848	0.00179945	0.0123177	yes
Unigene0013215	0	9.5	0.001	0.369	8.52748	0.00268472	0.0176115	yes
Unigene0013222	20	250	1.16565	14.9302	3.67903	3.51593e-12	8.46022e-11	yes
Unigene0013250	1804	156.5	28.1718	2.4237	-3.53897	2.1934e-48	4.20195e-46	yes
Unigene0013275	3.5	46.5	0.05925	0.76035	3.68178	4.7919e-05	0.000458997	yes
Unigene0013279	30.5	3	0.71795	0.06955	-3.36776	1.04896e-05	0.000113251	yes
Unigene0013291	12	0	0.40035	0.001	-8.64512	0.000839054	0.00622681	yes
Unigene0013293	34	11	0.62465	0.20245	-1.62548	0.00567192	0.0337158	yes
Unigene0013341	586	239	12.2348	5.0449	-1.2781	1.01474e-12	2.56257e-11	yes
Unigene0013347	100.5	19	2.0181	0.3834	-2.39608	1.48599e-09	2.71526e-08	yes
Unigene0013349	129.5	37	0.99175	0.28875	-1.78016	5.15345e-08	7.82665e-07	yes
Unigene0013357	6.5	27	0.16305	0.69065	2.08264	0.00620187	0.0363588	yes
Unigene0013383	694	332	10.6522	5.0712	-1.07075	4.87626e-08	7.43879e-07	yes
Unigene0013393	111.5	41	1.31045	0.49955	-1.39136	0.00128784	0.00912571	yes
Unigene0013396	31.5	94.5	0.4246	1.2913	1.60465	2.86541e-05	0.000286635	yes
Unigene0013422	6	55.5	0.12125	1.10965	3.19405	1.37229e-08	2.23188e-07	yes
Unigene0013435	80	32	2.71135	1.0859	-1.32012	0.00457892	0.0280081	yes
Unigene0013444	11	44.5	0.2548	1.02515	2.0084	0.00020549	0.00174079	yes
Unigene0013452	5	39	0.09585	0.73445	2.93781	3.29885e-05	0.000325791	yes
Unigene0013455	9	0	0.4545	0.001	-8.82814	0.00367099	0.0231492	yes
Unigene0013469	1031	196	15.7582	3.0273	-2.38	2.7397e-31	2.35192e-29	yes
Unigene0013493	30	5	0.59785	0.0964	-2.63268	0.000223683	0.00188235	yes
Unigene0013501	11.5	0	0.4517	0.001	-8.81922	0.000671964	0.00509979	yes
Unigene0013503	198	53	2.9716	0.80995	-1.87534	1.67139e-10	3.39111e-09	yes
Unigene0013515	8	29	0.15995	0.593	1.89041	0.00403959	0.0251486	yes
Unigene0013517	477.5	225	9.09905	4.30745	-1.07888	4.6568e-09	8.05104e-08	yes
Unigene0013526	32	5.5	1.4622	0.2519	-2.53722	9.83054e-05	0.00088496	yes
Unigene0013545	21.5	55	0.3655	0.93595	1.35656	0.0011685	0.00836254	yes
Unigene0013550	0.5	16.5	0.01765	0.5988	5.08433	0.000254867	0.00212155	yes
Unigene0013552	1004.5	404.5	17.7629	7.18905	-1.30499	1.19865e-17	4.51647e-16	yes
Unigene0013559	15.5	143.5	0.23745	2.16465	3.18844	2.92467e-13	7.80454e-12	yes
Unigene0013581	46	7	1.4903	0.24055	-2.63119	0.000261808	0.00217468	yes
Unigene0013582	102	49	2.68995	1.3046	-1.04397	0.000699708	0.00528903	yes
Unigene0013594	222.5	31	5.82335	0.78695	-2.88751	2.38564e-10	4.76239e-09	yes
Unigene0013597	24.5	0	1.2653	0.001	-10.3053	2.61472e-07	3.60228e-06	yes
Unigene0013599	74.5	9	2.28345	0.2719	-3.07007	6.41506e-11	1.35861e-09	yes
Unigene0013612	62.5	15.5	1.82905	0.4652	-1.97517	1.39386e-05	0.000147228	yes
Unigene0013622	17.5	2	0.6078	0.075	-3.01863	0.00270459	0.0177163	yes
Unigene0013709	5	27	0.16435	0.90145	2.45548	0.00718282	0.0413069	yes
Unigene0013717	5.5	23	0.1148	0.479	2.0609	0.00826995	0.0465968	yes
Unigene0013718	3	33.5	0.0574	0.62855	3.4529	1.6251e-05	0.000170138	yes
Unigene0013733	54	4	1.12835	0.08125	-3.7957	2.38836e-07	3.31131e-06	yes
Unigene0013780	25.5	1	0.43795	0.0185	-4.56517	7.73744e-06	8.55576e-05	yes
Unigene0013810	406.5	45	10.3012	1.1345	-3.18269	5.01327e-34	5.04079e-32	yes
Unigene0013843	11	0	0.79055	0.001	-9.62671	0.00612614	0.0359728	yes
Unigene0013844	814	142	9.91705	1.7682	-2.48763	8.53853e-27	5.8128e-25	yes
Unigene0013863	1501.5	408.5	11.5862	3.1569	-1.87583	1.10212e-34	1.15941e-32	yes
Unigene0013864	52	1.5	1.60785	0.04575	-5.13522	7.97168e-11	1.67916e-09	yes
Unigene0013896	8	0	0.3437	0.001	-8.42501	0.00715343	0.0411664	yes
Unigene0013905	4	36.5	0.132	1.2032	3.18827	1.86141e-06	2.26952e-05	yes
Unigene0013912	39	9	2.3759	0.574	-2.04935	0.00391162	0.0244579	yes
Unigene0013924	146.5	31	1.3379	0.2865	-2.22336	3.9359e-12	9.4251e-11	yes
Unigene0013985	22	4.5	0.4415	0.0919	-2.26428	0.00308088	0.0198736	yes
Unigene0013995	24	177.5	1.27455	9.63345	2.91806	8.26685e-14	2.31463e-12	yes
Unigene0014047	14	0	0.3104	0.001	-8.27798	0.00102186	0.00742009	yes
Unigene0014089	1128.5	454.5	8.5504	3.4591	-1.3056	4.32776e-19	1.81341e-17	yes
Unigene0014153	134.5	45.5	2.025	0.6878	-1.55786	4.79216e-08	7.31458e-07	yes
Unigene0014159	13	0	0.3846	0.001	-8.58721	0.00076473	0.00572425	yes
Unigene0014168	21	135.5	0.3203	2.0607	2.68564	1.29767e-10	2.66454e-09	yes
Unigene0014195	18	3.5	0.50405	0.0959	-2.39396	0.00632824	0.037036	yes
Unigene0014202	1.5	17	0.08475	0.9578	3.49844	0.00125272	0.0088976	yes
Unigene0014214	4.5	28	0.24445	1.5563	2.67051	0.000279827	0.0023117	yes
Unigene0014260	11	0	1.0525	0.001	-10.0396	0.000932789	0.00683878	yes
Unigene0014270	9.5	0	0.57055	0.001	-9.15621	0.00367137	0.0231492	yes
Unigene0014310	74.5	0.5	3.9144	0.02465	-7.31106	2.02093e-17	7.46037e-16	yes
Unigene0014318	29	6	0.5918	0.1235	-2.2606	0.000475783	0.00373821	yes
Unigene0014319	29	2	0.54675	0.03535	-3.9511	3.30624e-05	0.000326427	yes
Unigene0014337	10	0.5	0.35885	0.01685	-4.41256	0.00788302	0.0446845	yes
Unigene0014348	25.5	64	0.8527	2.1665	1.34526	0.000986177	0.00718371	yes
Unigene0014362	0	9	0.001	0.56745	9.14835	0.00640769	0.0374529	yes
Unigene0014385	1	13	0.03495	0.46035	3.71937	0.00387745	0.0242749	yes
Unigene0014397	31.5	149	0.97675	4.7211	2.27306	8.47414e-10	1.59103e-08	yes
Unigene0014413	0	8	0.001	0.47215	8.8831	0.00722894	0.0415327	yes
Unigene0014414	0	12	0.001	0.6634	9.37374	0.000622925	0.00476003	yes
Unigene0014435	4.5	73	0.07035	1.12795	4.00301	1.63754e-08	2.63579e-07	yes
Unigene0014481	152	22.5	2.2421	0.33555	-2.74025	8.81147e-18	3.35253e-16	yes
Unigene0014484	33.5	6	0.6554	0.11585	-2.50012	0.000137383	0.00120244	yes
Unigene0014520	188	35	3.3764	0.62945	-2.42332	6.16903e-18	2.37195e-16	yes
Unigene0014522	0	18.5	0.001	0.7861	9.61857	2.41528e-05	0.00024511	yes
Unigene0014524	58	14	1.35705	0.317	-2.09792	0.000877838	0.00648555	yes
Unigene0014531	2	18.5	0.0526	0.47565	3.17677	0.00188736	0.0128502	yes
Unigene0014533	31	131	0.29285	1.1935	2.02696	0.00048449	0.00380002	yes
Unigene0014559	98	29.5	5.18595	1.60635	-1.69082	4.27222e-05	0.000413792	yes
Unigene0014574	188.5	53.5	5.5706	1.58075	-1.81722	1.17242e-07	1.69657e-06	yes
Unigene0014588	0	34.5	0.001	0.5831	9.1876	2.04099e-10	4.10438e-09	yes
Unigene0014589	0	12	0.001	0.55385	9.11335	0.0004793	0.00376259	yes
Unigene0014592	1	32.5	0.0368	1.2153	5.04546	3.25257e-08	5.05649e-07	yes
Unigene0014595	140.5	49	2.269	0.81875	-1.47056	0.000372529	0.00299832	yes
Unigene0014601	54	2	0.878	0.03505	-4.64673	6.37414e-08	9.60307e-07	yes
Unigene0014609	1134.5	353.5	39.4749	12.4911	-1.66003	1.139e-21	5.71571e-20	yes
Unigene0014610	628.5	220.5	16.9877	5.92945	-1.51852	1.17159e-14	3.50886e-13	yes
Unigene0014622	10	138	0.15735	2.18195	3.79357	6.72717e-23	3.64375e-21	yes
Unigene0014623	122.5	14	1.6121	0.1895	-3.08867	1.87039e-11	4.20072e-10	yes
Unigene0014627	235	64.5	5.6101	1.5362	-1.86866	2.40612e-09	4.28752e-08	yes
Unigene0014633	10	0	0.42095	0.001	-8.71751	0.00346871	0.0220419	yes
Unigene0014678	79	34.5	1.8323	0.80645	-1.184	0.00076901	0.00575314	yes
Unigene0014691	54.5	3	1.5171	0.09005	-4.07445	2.13803e-08	3.39832e-07	yes
Unigene0014701	103	19.5	2.66565	0.50445	-2.4017	2.60336e-09	4.6254e-08	yes
Unigene0014712	22	3.5	0.5975	0.09895	-2.59417	0.00252019	0.0166281	yes
Unigene0014718	28.5	0.5	0.5621	0.0106	-5.72869	2.4216e-05	0.000245707	yes
Unigene0014747	3	28	0.2961	2.7999	3.24122	2.26258e-05	0.000230686	yes
Unigene0014748	5.5	43	0.5401	4.35205	3.0104	1.1217e-05	0.000120414	yes
Unigene0014756	3	21	0.11095	0.7921	2.83577	0.00372714	0.0234576	yes
Unigene0014768	92	9	0.80105	0.0797	-3.32924	1.21523e-14	3.63757e-13	yes
Unigene0014772	75	6	2.9809	0.23495	-3.66532	4.30377e-12	1.0279e-10	yes
Unigene0014793	0	44	0.001	3.8357	11.9053	1.28188e-07	1.8447e-06	yes
Unigene0014804	0	8	0.001	0.61405	9.26221	0.00788092	0.0446814	yes
Unigene0014912	26	191	0.6018	4.4269	2.87894	2.46419e-21	1.20556e-19	yes
Unigene0014913	4	34.5	0.09495	0.8078	3.08876	0.000202896	0.00172335	yes
Unigene0014941	9	0	0.2106	0.001	-7.71836	0.00367129	0.0231492	yes
Unigene0014950	7	28.5	0.15455	0.62905	2.0251	0.00223631	0.0149374	yes
Unigene0014968	75	9	0.97125	0.12215	-2.99119	1.57737e-08	2.54645e-07	yes
Unigene0014993	2	20.5	0.14365	1.484	3.36886	0.000204167	0.00173268	yes
Unigene0015000	2	17.5	0.04925	0.43765	3.15158	0.00311695	0.0200707	yes
Unigene0015001	3.5	25	0.16795	1.22955	2.87203	0.00038246	0.00307172	yes
Unigene0015049	9	0	0.76765	0.001	-9.5843	0.00399853	0.0249254	yes
Unigene0015068	559.5	85	6.6029	0.98495	-2.74498	5.42884e-22	2.79099e-20	yes
Unigene0015149	15.5	1	0.48535	0.03385	-3.8418	0.00260441	0.017132	yes
Unigene0015211	89.5	9	3.16205	0.3228	-3.29215	3.42961e-07	4.64044e-06	yes
Unigene0015225	13	1	0.4446	0.0369	-3.59082	0.00467706	0.0285253	yes
Unigene0015244	816	314	7.5442	2.94355	-1.35781	4.3055e-13	1.13069e-11	yes
Unigene0015261	1	20.5	0.0307	0.62765	4.35365	4.8842e-05	0.00046751	yes
Unigene0015263	15.5	1	0.4953	0.0345	-3.84363	0.0010021	0.00728528	yes
Unigene0015272	240	96	6.17285	2.43985	-1.33914	1.77725e-05	0.000184581	yes
Unigene0015278	430	193.5	3.87045	1.7557	-1.14045	6.71491e-07	8.75198e-06	yes
Unigene0015279	100	31	0.6959	0.2144	-1.69858	1.02328e-06	1.30049e-05	yes
Unigene0015303	49.5	204	0.8837	3.6661	2.05262	4.29777e-07	5.74137e-06	yes
Unigene0015312	762.5	2866	9.8294	37.3621	1.9264	1.21753e-32	1.12288e-30	yes
Unigene0015330	13.5	0	0.4626	0.001	-8.85362	0.000173711	0.00149194	yes
Unigene0015342	38.5	9.5	1.5445	0.3915	-1.98006	0.000392086	0.00313887	yes
Unigene0015344	1288.5	395	31.6057	9.77955	-1.69234	1.13756e-30	9.45333e-29	yes
Unigene0015386	0	23	0.001	0.9377	9.87298	0.000275829	0.0022835	yes
Unigene0015387	477.5	126	9.8943	2.60725	-1.92407	1.26431e-22	6.70836e-21	yes
Unigene0015404	30.5	493	0.7292	11.723	4.00688	6.4408e-45	1.0592e-42	yes
Unigene0015435	491.5	1114.5	6.2311	14.1299	1.1812	3.50812e-14	1.01075e-12	yes
Unigene0015460	0.5	14.5	0.01905	0.5511	4.85445	0.000471834	0.00370931	yes
Unigene0015502	360	818.5	5.2511	12.0212	1.19488	8.0845e-16	2.66223e-14	yes
Unigene0015503	3	27.5	0.04135	0.38555	3.22096	3.00786e-05	0.000299022	yes
Unigene0015522	1006.5	471	11.5988	5.42525	-1.09621	7.18221e-12	1.66866e-10	yes
Unigene0015570	0.5	13.5	0.0248	0.64485	4.70055	0.0044963	0.0275861	yes
Unigene0015581	17	2	0.47575	0.0525	-3.17981	0.00478859	0.0291339	yes
Unigene0015599	4.5	22	0.11645	0.55965	2.26481	0.0044855	0.0275353	yes
Unigene0015640	3252	1220	45.0344	17.0481	-1.40141	1.23453e-32	1.13664e-30	yes
Unigene0015641	114.5	32.5	1.35155	0.39435	-1.77707	1.79354e-06	2.19068e-05	yes
Unigene0015642	262.5	124.5	6.0169	2.83555	-1.08539	1.66862e-05	0.000174461	yes
Unigene0015659	34	369.5	0.77595	8.3877	3.43424	1.21349e-32	1.12105e-30	yes
Unigene0015664	5	32	0.15535	1.00425	2.69252	3.57332e-05	0.000350867	yes
Unigene0015665	85.5	9	0.91665	0.09965	-3.20143	4.54013e-12	1.08151e-10	yes
Unigene0015689	27.5	4	0.52625	0.0773	-2.76721	0.000167928	0.00144843	yes
Unigene0015722	0	10	0.001	0.60325	9.23661	0.00246383	0.0162956	yes
Unigene0015726	30	6.5	0.59425	0.13605	-2.12693	0.00860002	0.048109	yes
Unigene0015734	30.5	7	0.5676	0.13145	-2.11036	0.000464989	0.00366183	yes
Unigene0015740	4	43	0.0811	0.8645	3.41409	1.07737e-07	1.57278e-06	yes
Unigene0015751	537	256	3.551	1.7114	-1.05305	6.01479e-07	7.88653e-06	yes
Unigene0015769	8	38.5	0.19745	0.95115	2.26819	3.78779e-05	0.000370298	yes
Unigene0015774	54.5	1	0.74595	0.01285	-5.85924	4.33886e-11	9.37077e-10	yes
Unigene0015776	48	13	0.7148	0.19875	-1.84658	0.000851189	0.0063083	yes
Unigene0015779	0	11	0.001	0.30115	8.23434	0.000934788	0.00684792	yes
Unigene0015781	31.5	5	0.41445	0.0674	-2.62038	7.74202e-05	0.000712694	yes
Unigene0015818	16	3	0.5613	0.10375	-2.43566	0.00835765	0.04702	yes
Unigene0015843	2.5	30	0.0411	0.4802	3.54643	0.000416452	0.00331546	yes
Unigene0015866	4	34	0.09095	0.7738	3.08882	7.38547e-06	8.19743e-05	yes
Unigene0015867	4	22	0.1249	0.68355	2.45227	0.00234798	0.0156069	yes
Unigene0015868	56	18	1.3642	0.4426	-1.62398	9.73502e-05	0.000876794	yes
Unigene0015913	18	3	0.4808	0.079	-2.60551	0.0032122	0.0206062	yes
Unigene0015989	104	252	3.44655	8.3571	1.27785	2.20711e-08	3.50099e-07	yes
Unigene0016024	22	87.5	2.06105	8.24605	2.00032	1.72649e-06	2.11494e-05	yes
Unigene0016051	16	0.5	0.49385	0.0145	-5.08995	0.00017594	0.0015099	yes
Unigene0016072	36.5	11	0.79015	0.242	-1.70712	0.00116316	0.00832865	yes
Unigene0016093	12	0	0.527	0.001	-9.04166	0.000500306	0.00391118	yes
Unigene0016112	59.5	4	1.42945	0.09015	-3.98699	1.04254e-08	1.72958e-07	yes
Unigene0016123	122	309.5	5.66705	14.4328	1.34868	2.76377e-10	5.46923e-09	yes
Unigene0016143	115.5	49	4.15635	1.7695	-1.23198	2.34168e-05	0.000238084	yes
Unigene0016172	6	81	0.0959	1.28765	3.74707	4.28278e-14	1.2281e-12	yes
Unigene0016173	126	22.5	3.67775	0.66405	-2.46946	2.14417e-13	5.79721e-12	yes
Unigene0016174	12.5	0.5	0.36605	0.01585	-4.52949	0.00212214	0.0142568	yes
Unigene0016187	618	294.5	16.6968	8.02175	-1.05758	1.06872e-10	2.21694e-09	yes
Unigene0016234	13	71.5	0.0945	0.5008	2.40585	0.000444941	0.0035151	yes
Unigene0016265	71	17.5	2.71915	0.6732	-2.01405	2.30035e-05	0.000234275	yes
Unigene0016286	4	23	0.0966	0.55975	2.53469	0.0013183	0.00932085	yes
Unigene0016290	10.5	0	0.45815	0.001	-8.83968	0.0015174	0.0105699	yes
Unigene0016304	10	0	0.19585	0.001	-7.61361	0.00205213	0.0138392	yes
Unigene0016309	96.5	26	0.7977	0.2156	-1.88749	3.3633e-07	4.55544e-06	yes
Unigene0016310	70.5	33.5	0.81275	0.38515	-1.07739	0.00465429	0.0284086	yes
Unigene0016367	15.5	107	0.65575	4.4938	2.77672	9.4602e-11	1.97593e-09	yes
Unigene0016383	1.5	16.5	0.04905	0.54575	3.47592	0.0015705	0.0109078	yes
Unigene0016389	58.5	1	1.9801	0.0318	-5.9604	2.64627e-15	8.36601e-14	yes
Unigene0016404	35	2	0.90455	0.04845	-4.22263	1.57253e-05	0.000165173	yes
Unigene0016405	15	0	0.27285	0.001	-8.09196	0.000193333	0.00164931	yes
Unigene0016406	1797	318.5	23.3955	4.1689	-2.48849	1.12203e-73	4.98052e-71	yes
Unigene0016410	5	28.5	0.0934	0.53225	2.51061	0.000184133	0.00157501	yes
Unigene0016453	672.5	154.5	29.0841	6.79045	-2.09865	9.778e-19	4.01398e-17	yes
Unigene0016460	26.5	6.5	0.43925	0.11065	-1.98904	0.00640264	0.0374273	yes
Unigene0016467	269	115.5	7.67825	3.33215	-1.20432	1.013e-05	0.000109803	yes
Unigene0016472	3	25	0.09415	0.7729	3.03725	0.00029073	0.0023938	yes
Unigene0016501	128.5	258.5	12.2964	24.9208	1.01911	1.70698e-06	2.09327e-05	yes
Unigene0016527	76	19	5.69125	1.43135	-1.99137	3.53478e-07	4.7723e-06	yes
Unigene0016548	79.5	26	0.99185	0.33355	-1.57222	0.000124091	0.00109558	yes
Unigene0016597	0.5	10.5	0.02515	0.5435	4.43365	0.00645539	0.0376953	yes
Unigene0016615	4.5	19.5	0.1105	0.4843	2.13185	0.00676974	0.0393416	yes
Unigene0016631	20.5	1	0.65585	0.0345	-4.2487	0.000204185	0.00173268	yes
Unigene0016632	26.5	3.5	0.6758	0.0964	-2.80949	0.00191905	0.0130448	yes
Unigene0016665	5	27	0.1382	0.7674	2.47322	0.000908465	0.006691	yes
Unigene0016681	11	41	0.6685	2.55185	1.93254	0.000758216	0.00568017	yes
Unigene0016719	0.5	16	0.0125	0.418	5.0635	0.000539284	0.00418738	yes
Unigene0016774	1	45.5	0.02525	1.16025	5.52201	6.47897e-12	1.51235e-10	yes
Unigene0016781	41	10.5	1.5928	0.41565	-1.93812	0.000170696	0.00146875	yes
Unigene0016804	15	1.5	0.62035	0.06105	-3.34502	0.00615966	0.0361385	yes
Unigene0016824	9	0	0.49525	0.001	-8.95201	0.00456354	0.0279328	yes
Unigene0016865	17.5	223.5	1.6319	20.5174	3.65222	9.00777e-18	3.42007e-16	yes
Unigene0016978	12.5	0	0.6268	0.001	-9.29186	0.000909837	0.00669839	yes
Unigene0016982	14	1	0.5835	0.0449	-3.69995	0.00529611	0.0317163	yes
Unigene0016990	0	8.5	0.001	0.434	8.76155	0.00529518	0.0317142	yes
Unigene0017010	17	1	0.6956	0.03845	-4.1772	0.00050375	0.00393416	yes
Unigene0017013	10	0	0.36785	0.001	-8.52297	0.00188162	0.012816	yes
Unigene0017014	20.5	0	0.51745	0.001	-9.01528	1.28468e-06	1.60763e-05	yes
Unigene0017133	12	0	0.4748	0.001	-8.89118	0.00109208	0.00787721	yes
Unigene0017141	71	2	1.47685	0.04485	-5.04127	3.94592e-13	1.03977e-11	yes
Unigene0017145	98	34	1.6045	0.5645	-1.50708	1.98797e-05	0.000204559	yes
Unigene0017170	45.5	14.5	1.05445	0.3466	-1.60515	0.00180869	0.0123748	yes
Unigene0017176	220.5	73	6.6474	2.2157	-1.58503	2.10567e-10	4.22512e-09	yes
Unigene0017187	10.5	0	0.21085	0.001	-7.72007	0.00177264	0.0121525	yes
Unigene0017267	2341.5	858	26.6205	9.8436	-1.43528	1.03617e-26	7.01026e-25	yes
Unigene0017284	12.5	38	0.33315	1.0139	1.60567	0.00239117	0.0158708	yes
Unigene0017294	92.5	23	2.2913	0.5725	-2.00082	2.88527e-05	0.000288516	yes
Unigene0017330	105	4	2.09565	0.08615	-4.6044	5.88121e-17	2.10697e-15	yes
Unigene0017396	24.5	5	0.83965	0.1655	-2.34296	0.00497129	0.0300745	yes
Unigene0017414	0	9	0.001	0.47855	8.90253	0.00641253	0.0374651	yes
Unigene0017420	34	6	0.8678	0.1581	-2.45653	7.92013e-05	0.000727392	yes
Unigene0017457	12.5	221	0.16515	2.9689	4.16808	4.22912e-29	3.23845e-27	yes
Unigene0017458	34.5	3	2.0183	0.18525	-3.4456	2.46672e-06	2.94829e-05	yes
Unigene0017475	19	3	1.0405	0.16215	-2.68188	0.00284963	0.0185551	yes
Unigene0017479	81.5	8	1.40695	0.1428	-3.3005	3.08242e-08	4.80566e-07	yes
Unigene0017487	15	0	0.615	0.001	-9.26444	7.84375e-05	0.000721207	yes
Unigene0017511	40	223	1.26845	7.0397	2.47245	1.97423e-17	7.29782e-16	yes
Unigene0017539	238	99.5	3.82535	1.5771	-1.27832	1.36261e-05	0.000144206	yes
Unigene0017544	8	28	0.14895	0.5247	1.81666	0.00302641	0.0195661	yes
Unigene0017581	39.5	2	0.6516	0.0356	-4.19404	1.67858e-08	2.69788e-07	yes
Unigene0017598	0	18.5	0.001	0.76445	9.57828	9.97376e-05	0.000896965	yes
Unigene0017613	5.5	23.5	0.21315	0.9137	2.09985	0.00423179	0.026184	yes
Unigene0017674	1628.5	143.5	23.2223	2.0527	-3.49992	1.63517e-70	6.71257e-68	yes
Unigene0017675	0	20.5	0.001	0.88355	9.78717	0.000452595	0.00357195	yes
Unigene0017700	17	51.5	0.2787	0.8541	1.61569	0.00124539	0.00884902	yes
Unigene0017763	17.5	0	0.56395	0.001	-9.13942	2.19631e-05	0.000224643	yes
Unigene0017780	7077.5	1376.5	158.42	31.0078	-2.35306	1.27523e-52	2.88901e-50	yes
Unigene0017843	18	1	0.5413	0.03245	-4.06014	0.000216088	0.0018232	yes
Unigene0017943	3.5	24.5	0.1069	0.75655	2.82317	0.000644659	0.00491305	yes
Unigene0017959	598.5	172.5	11.6954	3.39405	-1.78486	9.51288e-24	5.47297e-22	yes
Unigene0017961	0	16	0.001	0.5353	9.0642	3.9131e-05	0.000381582	yes
Unigene0017982	33.5	5	0.7183	0.1068	-2.74967	3.1677e-05	0.000313543	yes
Unigene0018042	0.5	14	0.01755	0.523	4.89727	0.00432589	0.0267087	yes
Unigene0018056	85	31	2.63345	0.9751	-1.43333	0.000351591	0.00284472	yes
Unigene0018074	0	16	0.001	0.7439	9.53896	3.09726e-05	0.00030696	yes
Unigene0018079	9	0	0.40515	0.001	-8.66231	0.00399871	0.0249254	yes
Unigene0018094	0	16.5	0.001	0.66375	9.3745	0.000136069	0.00119266	yes
Unigene0018095	1.5	18.5	0.0644	0.77035	3.58038	0.00204995	0.0138279	yes
Unigene0018141	195.5	96	8.0071	3.93365	-1.02541	1.44336e-05	0.000152161	yes
Unigene0018168	328.5	131	6.132	2.45125	-1.32284	2.99236e-08	4.67458e-07	yes
Unigene0018172	3905.5	1905	101.221	49.5448	-1.0307	3.066e-20	1.38804e-18	yes
Unigene0018174	31	9	0.45905	0.13125	-1.80633	0.00456733	0.0279465	yes
Unigene0018178	9	104	0.2347	2.7399	3.54523	4.16161e-17	1.50374e-15	yes
Unigene0018179	125	48.5	3.59585	1.4108	-1.34982	0.00409931	0.0254682	yes
Unigene0018190	0	16	0.001	0.3542	8.46842	0.000224944	0.00189208	yes
Unigene0018193	0	13	0.001	0.45055	8.81554	0.000244789	0.00204671	yes
Unigene0018225	71.5	14	1.0643	0.2126	-2.32369	4.84255e-07	6.42356e-06	yes
Unigene0018227	1	30.5	0.0288	0.89115	4.95153	1.0269e-07	1.50232e-06	yes
Unigene0018239	416	46.5	5.1267	0.5683	-3.17331	1.54438e-12	3.81366e-11	yes
Unigene0018249	16	2	0.4682	0.0631	-2.89141	0.00712377	0.0410408	yes
Unigene0018258	158	67.5	3.119	1.3557	-1.20205	3.43571e-05	0.000338414	yes
Unigene0018269	973.5	184.5	13.8443	2.63435	-2.39377	6.57955e-34	6.54335e-32	yes
Unigene0018274	12.5	1	0.5074	0.0438	-3.53412	0.00575371	0.0341235	yes
Unigene0018294	3	18	0.066	0.39735	2.58987	0.003387	0.0215931	yes
Unigene0018300	21.5	1	0.8662	0.0377	-4.52206	0.0014033	0.00984294	yes
Unigene0018308	1539	765	21.9923	10.975	-1.00278	2.20825e-16	7.57325e-15	yes
Unigene0018322	35	5	0.63475	0.09275	-2.77477	9.09504e-06	9.94534e-05	yes
Unigene0018327	60.5	10.5	0.8181	0.14765	-2.4701	2.66505e-06	3.16732e-05	yes
Unigene0018328	12.5	1	0.4982	0.03735	-3.73754	0.00861983	0.0482001	yes
Unigene0018333	9.5	47	0.31425	1.6028	2.35061	0.000396375	0.0031681	yes
Unigene0018334	16.5	3	0.596	0.1068	-2.4804	0.00670086	0.0389662	yes
Unigene0018341	36.5	7.5	0.6759	0.14365	-2.23425	0.00097567	0.00711495	yes
Unigene0018346	0	9	0.001	0.57395	9.16478	0.00377998	0.0237398	yes
Unigene0018354	95.5	4	0.91715	0.03875	-4.56489	1.13921e-18	4.66258e-17	yes
Unigene0018359	16.5	1	0.56875	0.0372	-3.93442	0.000569056	0.004402	yes
Unigene0018365	115.5	27.5	1.21635	0.2919	-2.05901	2.4594e-10	4.90426e-09	yes
Unigene0018371	434.5	151	7.0025	2.4667	-1.50529	1.887e-13	5.12824e-12	yes
Unigene0018373	95.5	420	2.33125	10.3349	2.14835	5.21803e-24	3.03725e-22	yes
Unigene0018382	0	8	0.001	0.55665	9.12063	0.00754814	0.0430945	yes
Unigene0018383	51	1494	0.9279	27.4732	4.88791	1.23444e-134	1.9823e-131	yes
Unigene0018385	1485	669	12.5949	5.7626	-1.12805	1.30016e-09	2.39091e-08	yes
Unigene0018389	23	51.5	0.73855	1.6491	1.15891	0.00868926	0.0485485	yes
Unigene0018423	14440.5	3655.5	169.096	43.1321	-1.97101	8.12149e-78	4.03106e-75	yes
Unigene0018433	16	2.5	0.55435	0.0863	-2.68336	0.00587014	0.0347084	yes
Unigene0018483	203.5	80.5	4.44725	1.7538	-1.34243	1.0727e-07	1.56681e-06	yes
Unigene0018493	806.5	116.5	5.8575	0.8605	-2.76704	8.42624e-43	1.26043e-40	yes
Unigene0018500	11.5	0.5	0.16755	0.00785	-4.41576	0.00297828	0.0192847	yes
Unigene0018510	1.5	13.5	0.0428	0.3811	3.15449	0.00587683	0.0347405	yes
Unigene0018528	0	26.5	0.001	0.70695	9.46546	0.000990539	0.00721175	yes
Unigene0018529	154.5	1243.5	3.60465	29.4108	3.02841	3.79076e-57	1.04529e-54	yes
Unigene0018531	26.5	4	0.56405	0.08285	-2.76725	0.000521199	0.00405767	yes
Unigene0018561	25.5	2	0.94555	0.0747	-3.66197	0.000422549	0.00335911	yes
Unigene0018563	434.5	98.5	5.57025	1.27675	-2.12527	8.06329e-25	4.93542e-23	yes
Unigene0018564	367	90	4.61805	1.13945	-2.01895	7.80902e-22	3.95875e-20	yes
Unigene0018582	0	41	0.001	0.69595	9.44284	1.74195e-12	4.28989e-11	yes
Unigene0018585	1190	253	19.804	4.2586	-2.21734	3.19203e-44	5.081e-42	yes
Unigene0018586	1	32	0.02255	0.72005	4.9969	3.57834e-08	5.52518e-07	yes
Unigene0018606	14.5	1	0.4573	0.0296	-3.94947	0.00204014	0.0137779	yes
Unigene0018611	1959.5	836	33.1558	14.237	-1.21962	5.35542e-11	1.14396e-09	yes
Unigene0018621	8	0	0.31745	0.001	-8.31039	0.00801953	0.0453731	yes
Unigene0018625	27	1	0.58925	0.0235	-4.64815	0.000125933	0.00111077	yes
Unigene0018629	170	938	2.76815	15.2304	2.45996	9.89883e-33	9.19144e-31	yes
Unigene0018636	468.5	124.5	13.6034	3.6536	-1.89658	5.21566e-22	2.68393e-20	yes
Unigene0018639	52	23	1.435	0.6463	-1.15077	0.00723147	0.0415385	yes
Unigene0018673	0	17	0.001	1.00775	9.97692	1.77038e-05	0.000183902	yes
Unigene0018677	10.5	81	0.24725	1.87825	2.92535	1.32626e-08	2.16604e-07	yes
Unigene0018697	361	40.5	4.3426	0.4882	-3.15301	1.11076e-17	4.1911e-16	yes
Unigene0018730	22	4	0.5624	0.10325	-2.44545	0.00141955	0.00994796	yes
Unigene0018733	205	17	3.64885	0.3066	-3.57301	1.24781e-27	8.90559e-26	yes
Unigene0018735	27.5	85.5	0.62295	1.95935	1.65319	4.01162e-06	4.6296e-05	yes
Unigene0018744	21.5	2	0.72355	0.0727	-3.31507	0.000545049	0.00422827	yes
Unigene0018745	31.5	143.5	0.7088	3.22465	2.18569	7.10198e-08	1.06205e-06	yes
Unigene0018749	17.5	2.5	0.6086	0.089	-2.77362	0.00241764	0.016027	yes
Unigene0018753	103	21.5	1.72505	0.3522	-2.29217	2.0676e-08	3.2902e-07	yes
Unigene0018765	307	32	8.86435	0.93135	-3.25062	7.99481e-16	2.63587e-14	yes
Unigene0018766	12.5	1.5	0.4574	0.0567	-3.01204	0.00887253	0.0494309	yes
Unigene0018771	92	0.5	2.54535	0.013	-7.61321	8.11661e-25	4.95694e-23	yes
Unigene0018774	11	0	0.39885	0.001	-8.6397	0.00104454	0.00756661	yes
Unigene0018775	73	20	1.2857	0.363	-1.82451	2.57671e-05	0.000260271	yes
Unigene0018785	0	23	0.001	0.76955	9.58787	5.37402e-06	6.0861e-05	yes
Unigene0018786	0	130.5	0.001	1.024	10	3.52041e-29	2.70334e-27	yes
Unigene0018787	0	22	0.001	0.5695	9.15355	1.08061e-05	0.000116369	yes
Unigene0018788	0	26	0.001	0.56865	9.1514	3.18856e-08	4.96404e-07	yes
Unigene0018792	808.5	375.5	9.63045	4.497	-1.09864	6.74163e-14	1.90026e-12	yes
Unigene0018797	16.5	42.5	0.3497	0.9041	1.37036	0.00290774	0.0188839	yes
Unigene0018802	1.5	20	0.0385	0.51395	3.7387	0.000129027	0.00113513	yes
Unigene0018807	148	21.5	3.1503	0.46515	-2.75972	1.03408e-10	2.14835e-09	yes
Unigene0018812	10.5	0	0.44355	0.001	-8.79295	0.00136611	0.00962286	yes
Unigene0018815	571	231	6.234	2.56035	-1.28382	9.42209e-09	1.57221e-07	yes
Unigene0018827	11	0	0.4776	0.001	-8.89966	0.000960763	0.00701843	yes
Unigene0018836	182	712.5	1.64495	6.47825	1.97756	3.93425e-27	2.74683e-25	yes
Unigene0018853	82	16.5	0.87625	0.18055	-2.27894	3.27403e-08	5.08695e-07	yes
Unigene0018869	15	0.5	0.7046	0.0221	-4.99469	0.00209943	0.0141285	yes
Unigene0018877	64	6	1.3485	0.1306	-3.36813	5.30469e-11	1.13421e-09	yes
Unigene0018878	43.5	5	1.30985	0.1541	-3.08746	1.33903e-07	1.92087e-06	yes
Unigene0018879	0	9	0.001	0.4695	8.87498	0.0064098	0.0374571	yes
Unigene0018927	5.5	24	0.1928	0.85685	2.15194	0.00686032	0.0397537	yes
Unigene0018934	15	1	0.70935	0.0443	-4.00112	0.00373869	0.0235194	yes
Unigene0018959	62.5	6.5	1.23365	0.1329	-3.21452	1.81842e-09	3.29184e-08	yes
Unigene0018988	775	357	17.4103	8.12645	-1.09924	1.20728e-10	2.48925e-09	yes
Unigene0018989	19	58	0.25975	0.8041	1.63025	0.000280251	0.00231485	yes
Unigene0019003	23	50.5	0.3211	0.71295	1.15078	0.00584262	0.0345682	yes
Unigene0019045	8	0	0.4121	0.001	-8.68685	0.00804783	0.0454955	yes
Unigene0019052	15.5	83.5	0.16265	0.8939	2.45834	3.19123e-08	4.96678e-07	yes
Unigene0019054	30	6	0.54175	0.1067	-2.34407	0.000878612	0.00648951	yes
Unigene0019055	57	9.5	0.82875	0.14615	-2.50349	6.64896e-05	0.000621503	yes
Unigene0019057	0	10	0.001	0.63985	9.32159	0.00240938	0.01598	yes
Unigene0019060	13	0.5	0.5053	0.02095	-4.59212	0.00541854	0.0323891	yes
Unigene0019061	14	1	0.34045	0.0263	-3.69431	0.00527649	0.0316265	yes
Unigene0019062	12	0	0.55675	0.001	-9.12089	0.00050434	0.00393765	yes
Unigene0019081	255	123	11.4887	5.5643	-1.04594	7.77173e-06	8.58775e-05	yes
Unigene0019099	40	5	0.4829	0.05825	-3.05139	0.000787771	0.0058798	yes
Unigene0019100	55	9.5	0.7825	0.1348	-2.53727	1.93183e-06	2.34751e-05	yes
Unigene0019121	34	0	0.50785	0.001	-8.98826	2.16515e-09	3.88347e-08	yes
Unigene0019131	1332.5	272	52.7679	10.8239	-2.28545	1.70583e-25	1.08549e-23	yes
Unigene0019134	13	37	0.15445	0.44865	1.53845	0.00453009	0.0277591	yes
Unigene0019136	67	4	2.853	0.17165	-4.05494	4.09191e-10	7.95619e-09	yes
Unigene0019146	2	37.5	0.0624	1.15615	4.21164	1.73616e-07	2.45572e-06	yes
Unigene0019150	37	0.5	1.06425	0.0135	-6.30073	2.9086e-09	5.13595e-08	yes
Unigene0019153	30	84	0.31365	0.88765	1.50084	0.0039454	0.0246325	yes
Unigene0019156	142	24.5	1.6747	0.303	-2.46651	1.1076e-06	1.40138e-05	yes
Unigene0019162	52.5	15.5	1.8233	0.5422	-1.74965	6.33088e-05	0.000593906	yes
Unigene0019167	219	93	6.3245	2.73475	-1.20954	5.68236e-06	6.41004e-05	yes
Unigene0019172	0	13	0.001	0.5228	9.03012	0.000330886	0.00269557	yes
Unigene0019173	0	25	0.001	0.7227	9.49725	6.05792e-05	0.000570357	yes
Unigene0019189	5104	1858	62.2447	22.8001	-1.44891	2.18126e-45	3.67569e-43	yes
Unigene0019199	962	1982	16.6446	34.287	1.0426	4.0492e-14	1.16296e-12	yes
Unigene0019204	95.5	0	1.1978	0.001	-10.2262	8.32627e-22	4.20534e-20	yes
Unigene0019206	66.5	19	1.9353	0.5645	-1.77751	2.81201e-05	0.000281758	yes
Unigene0019231	35	163	0.4059	1.94175	2.25816	1.75635e-07	2.48171e-06	yes
Unigene0019250	29.5	9	0.7781	0.2356	-1.72362	0.00837253	0.0470727	yes
Unigene0019251	25.5	61	0.4128	1.009	1.28941	0.00849058	0.0475895	yes
Unigene0019260	34	10.5	0.5255	0.15685	-1.74431	0.00687772	0.0398334	yes
Unigene0019268	1114.5	514.5	9.0308	4.1988	-1.10488	1.64867e-11	3.71959e-10	yes
Unigene0019275	13.5	0	0.5267	0.001	-9.04084	0.000225715	0.00189827	yes
Unigene0019286	66	454	4.37715	30.4285	2.79736	3.81767e-21	1.83645e-19	yes
Unigene0019296	83	31	2.66265	0.98375	-1.4365	0.000114369	0.00101584	yes
Unigene0019314	648.5	223.5	11.1273	3.89355	-1.51495	1.49662e-14	4.44332e-13	yes
Unigene0019321	38	0	0.8748	0.001	-9.77281	4.88064e-09	8.41671e-08	yes
Unigene0019325	3	18.5	0.0993	0.60155	2.59882	0.00571362	0.0339152	yes
Unigene0019333	61	19	0.99135	0.3158	-1.65038	0.00189545	0.0129021	yes
Unigene0019354	0.5	12	0.02015	0.4979	4.627	0.00290238	0.0188513	yes
Unigene0019381	47.5	10.5	0.85205	0.19695	-2.11311	0.000349355	0.00282958	yes
Unigene0019413	0	11	0.001	0.50795	8.98854	0.000986075	0.00718371	yes
Unigene0019415	80	26	4.2685	1.372	-1.63745	0.000652999	0.00497175	yes
Unigene0019442	56	14	1.56465	0.4102	-1.93144	0.00138324	0.00972848	yes
Unigene0019462	37	10	1.02595	0.2725	-1.91263	0.00412777	0.0256246	yes
Unigene0019506	241	93.5	3.57755	1.38795	-1.36602	6.4605e-07	8.44256e-06	yes
Unigene0019507	2282	470.5	109.732	23.1318	-2.24603	3.21085e-22	1.67117e-20	yes
Unigene0019544	134	48.5	1.27865	0.47125	-1.44006	7.52956e-05	0.000694541	yes
Unigene0019553	562.5	220	8.6172	3.39005	-1.34591	9.22328e-16	3.0136e-14	yes
Unigene0019580	45	9	0.46075	0.09395	-2.29402	0.00202611	0.0136959	yes
Unigene0019587	14	0	0.19745	0.001	-7.62534	0.00028486	0.00234936	yes
Unigene0019599	64.5	29.5	2.44145	1.1206	-1.12347	0.00211395	0.0142105	yes
Unigene0019601	487.5	115	5.2223	1.2472	-2.06599	9.52781e-25	5.77358e-23	yes
Unigene0019612	235.5	3.5	2.15015	0.03255	-6.04564	4.5992e-31	3.8811e-29	yes
Unigene0019624	24	5.5	0.59055	0.1342	-2.13767	0.00843705	0.0473674	yes
Unigene0019627	14.5	1	0.544	0.03525	-3.94791	0.00158565	0.0110004	yes
Unigene0019634	29	5	1.2148	0.21455	-2.50133	0.000397005	0.00317136	yes
Unigene0019640	56	22	0.73235	0.294	-1.31672	0.00218049	0.0145972	yes
Unigene0019651	0	11.5	0.001	0.38065	8.57232	0.00515807	0.0310495	yes
Unigene0019660	2751	1338.5	61.7341	30.3755	-1.02316	1.03068e-15	3.35557e-14	yes
Unigene0019667	546	244	7.14835	3.20925	-1.15537	4.97807e-12	1.17812e-10	yes
Unigene0019673	33.5	1	0.8275	0.0267	-4.95385	3.34391e-07	4.53254e-06	yes
Unigene0019675	0	8.5	0.001	0.57385	9.16453	0.00488064	0.0296082	yes
Unigene0019682	1894.5	877	31.2803	14.6037	-1.09892	2.65779e-18	1.05611e-16	yes
Unigene0019696	129.5	15	2.73465	0.3208	-3.09161	1.85743e-11	4.17505e-10	yes
Unigene0019714	28.5	2.5	1.15705	0.10945	-3.40211	9.62421e-05	0.00086753	yes
Unigene0019718	21	73	1.0737	3.82555	1.83308	9.39109e-05	0.000848758	yes
Unigene0019720	674	111	6.1341	1.0211	-2.58673	2.52488e-32	2.29373e-30	yes
Unigene0019725	308	84	6.7817	1.87765	-1.85272	5.96979e-15	1.84146e-13	yes
Unigene0019742	415	1205	8.87205	25.8417	1.54236	2.634e-24	1.56316e-22	yes
Unigene0019743	45	97	4.51185	9.7293	1.10862	0.00039636	0.0031681	yes
Unigene0019744	229	106	5.2625	2.48445	-1.08282	5.50212e-05	0.000522261	yes
Unigene0019751	543	173.5	3.7623	1.22735	-1.61607	5.71323e-11	1.21563e-09	yes
Unigene0019756	23.5	1	0.68835	0.0316	-4.44515	1.03823e-05	0.00011227	yes
Unigene0019763	81	6	1.81145	0.1322	-3.77635	1.01332e-12	2.56018e-11	yes
Unigene0019773	13.5	225.5	0.35785	6.0741	4.08524	1.91682e-29	1.49935e-27	yes
Unigene0019780	643	231	6.8916	2.52155	-1.45053	6.02946e-12	1.41347e-10	yes
Unigene0019788	0	12.5	0.001	0.5469	9.09513	0.00091083	0.00670373	yes
Unigene0019790	0	8.5	0.001	0.5453	9.09091	0.00836921	0.0470589	yes
Unigene0019791	479.5	203.5	6.2949	2.6674	-1.23875	4.43671e-10	8.58911e-09	yes
Unigene0019795	15.5	84.5	1.0898	5.99205	2.45899	8.43857e-09	1.41545e-07	yes
Unigene0019810	39	12.5	1.04055	0.3315	-1.65027	0.00520997	0.0313034	yes
Unigene0019825	331.5	142.5	4.7079	2.04645	-1.20196	7.06219e-09	1.19709e-07	yes
Unigene0019829	149.5	67	2.5024	1.1236	-1.15518	0.0011825	0.00845273	yes
Unigene0019831	48.5	22	0.5965	0.27495	-1.11735	0.00847072	0.0475179	yes
Unigene0019832	460.5	209.5	6.19805	2.8454	-1.12318	2.80241e-07	3.84921e-06	yes
Unigene0019849	158	1397	4.64985	41.1668	3.14622	4.08453e-80	2.23007e-77	yes
Unigene0019862	4.5	28	0.17015	1.0548	2.63209	0.000147528	0.00128444	yes
Unigene0019863	10	49.5	0.1437	0.70825	2.3012	2.27008e-05	0.000231365	yes
Unigene0019870	26.5	5	0.7253	0.1322	-2.45586	0.00225572	0.0150597	yes
Unigene0019871	6.5	99	0.0735	1.10995	3.91661	3.32133e-15	1.04038e-13	yes
Unigene0019881	4606	1875.5	29.6579	12.2345	-1.27746	5.18311e-23	2.82705e-21	yes
Unigene0019888	61	13	1.5439	0.3124	-2.30511	0.000906208	0.00667798	yes
Unigene0019905	2560.5	891.5	35.1175	12.4123	-1.50043	3.19592e-22	1.66499e-20	yes
Unigene0019939	29.5	67.5	0.60185	1.39755	1.21542	0.00162025	0.0112205	yes
Unigene0019941	12	1	0.4227	0.0331	-3.67473	0.00810555	0.0457696	yes
Unigene0019981	33.5	7.5	0.5819	0.12735	-2.19197	0.000676372	0.00513039	yes
Unigene0019993	79	38	1.00845	0.48935	-1.0432	0.00347843	0.022096	yes
Unigene0019994	31	8	0.54215	0.1462	-1.89075	0.00549106	0.0327651	yes
Unigene0020013	33	144.5	0.4974	2.1839	2.13443	2.7469e-10	5.44178e-09	yes
Unigene0020023	22	2	0.59595	0.05655	-3.39759	0.000128411	0.00113026	yes
Unigene0020025	1806.5	437	18.7218	4.5831	-2.03032	1.07374e-43	1.67021e-41	yes
Unigene0020038	57	13	1.9333	0.4424	-2.12764	4.70556e-06	5.37702e-05	yes
Unigene0020051	335	154	4.93115	2.3005	-1.09998	4.5243e-07	6.02336e-06	yes
Unigene0020053	5	67	0.07885	1.0323	3.71061	8.21507e-09	1.38008e-07	yes
Unigene0020055	4	30	0.069	0.5229	2.92187	2.85781e-05	0.000286032	yes
Unigene0020070	16	2	0.3637	0.0458	-2.98933	0.00369426	0.0232748	yes
Unigene0020091	10	0.5	0.16165	0.00875	-4.20745	0.0079263	0.0449108	yes
Unigene0020094	4	41	0.0883	0.9106	3.36633	1.929e-07	2.70605e-06	yes
Unigene0020100	57	1.5	0.64645	0.01675	-5.27031	8.16465e-14	2.28954e-12	yes
Unigene0020121	12	71.5	0.3146	1.85175	2.5573	2.95914e-07	4.04514e-06	yes
Unigene0020135	1675	519	10.7384	3.3615	-1.6756	2.25393e-33	2.17037e-31	yes
Unigene0020140	1233.5	601.5	9.12835	4.486	-1.02492	4.08434e-14	1.17243e-12	yes
Unigene0020145	28	3	0.61685	0.06825	-3.17602	2.98134e-05	0.000296873	yes
Unigene0020158	20	0	0.9682	0.001	-9.91916	1.65826e-05	0.00017341	yes
Unigene0020161	80.5	31	1.00385	0.3821	-1.39352	0.000386538	0.003099	yes
Unigene0020172	1754	792	35.8889	16.2853	-1.13997	6.91951e-19	2.87076e-17	yes
Unigene0020176	3524	1746.5	48.2368	23.9694	-1.00894	1.36831e-20	6.34726e-19	yes
Unigene0020184	0	9.5	0.001	0.58315	9.18772	0.00389968	0.0244019	yes
Unigene0020191	59	8	0.71225	0.09745	-2.86965	3.79812e-09	6.63159e-08	yes
Unigene0020195	42	8	1.069	0.2124	-2.33141	0.000534381	0.0041526	yes
Unigene0020205	90	17.5	1.68435	0.32355	-2.38013	3.88716e-08	5.98508e-07	yes
Unigene0020222	63	538.5	1.0376	8.95765	3.10987	3.13166e-37	3.67704e-35	yes
Unigene0020240	82.5	804	4.09385	40.3995	3.30281	2.94706e-52	6.48806e-50	yes
Unigene0020241	66.5	18.5	0.84675	0.23985	-1.8198	2.16919e-05	0.00022216	yes
Unigene0020246	1	49	0.0234	1.15455	5.62468	1.1729e-12	2.93348e-11	yes
Unigene0020247	37	357.5	0.57505	5.5382	3.26766	1.73519e-33	1.68573e-31	yes
Unigene0020278	7.5	29.5	0.1735	0.66935	1.94783	0.00475113	0.0289286	yes
Unigene0020286	0	9	0.001	0.3562	8.47654	0.00369395	0.0232748	yes
Unigene0020306	104.5	47.5	2.6013	1.1833	-1.13642	0.000354462	0.00286625	yes
Unigene0020315	5	39.5	0.1284	1.0166	2.98504	8.60239e-07	1.10407e-05	yes
Unigene0020321	75	26	2.00255	0.7039	-1.5084	0.000277897	0.00229888	yes
Unigene0020338	423.5	174	2.53775	1.04225	-1.28385	8.5545e-12	1.97615e-10	yes
Unigene0020343	329.5	127	5.6978	2.19525	-1.37602	1.02175e-10	2.12355e-09	yes
Unigene0020355	1.5	24	0.03955	0.6509	4.04069	3.02705e-05	0.000300711	yes
Unigene0020364	15.5	0.5	1.03745	0.0362	-4.84091	0.000585263	0.00451076	yes
Unigene0020368	24	69	0.9728	2.8617	1.55666	0.000452811	0.00357314	yes
Unigene0020370	108	13	2.57965	0.3152	-3.03284	7.69457e-15	2.34828e-13	yes
Unigene0020373	1822	666.5	28.0128	10.3358	-1.43844	5.12603e-29	3.91976e-27	yes
Unigene0020404	77.5	14	0.6388	0.11875	-2.42744	8.92522e-08	1.3156e-06	yes
Unigene0020408	777	326.5	7.57105	3.18725	-1.24818	5.43829e-16	1.8138e-14	yes
Unigene0020470	219.5	107.5	2.7005	1.3198	-1.03291	8.19447e-06	9.02747e-05	yes
Unigene0020484	33	8.5	0.7202	0.1881	-1.9369	0.000804465	0.00598721	yes
Unigene0020487	353.5	31	6.4404	0.5557	-3.53477	1.89818e-28	1.4024e-26	yes
Unigene0020492	25	4.5	0.51795	0.09755	-2.4086	0.00676218	0.0393019	yes
Unigene0020493	1986.5	910	25.156	11.5379	-1.12452	2.38546e-19	1.01751e-17	yes
Unigene0020502	4830	11977.5	31.7175	79.1363	1.31906	3.38627e-43	5.16435e-41	yes
Unigene0020503	11	44	0.25085	0.99575	1.98896	0.000197808	0.00168433	yes
Unigene0020507	19.5	1.5	1.48065	0.1173	-3.65796	0.00354767	0.0224914	yes
Unigene0020529	512	174	2.72625	0.9442	-1.52975	1.15381e-11	2.63801e-10	yes
Unigene0020543	0	175	0.001	8.3444	13.0266	2.38108e-42	3.5041e-40	yes
Unigene0020546	5.5	27.5	0.1343	0.6596	2.29613	0.00437125	0.0269248	yes
Unigene0020563	1.5	74.5	0.021	1.04705	5.6398	6.62618e-19	2.75534e-17	yes
Unigene0020564	0	32.5	0.001	0.8987	9.8117	8.60063e-10	1.61311e-08	yes
Unigene0020569	74	26.5	1.29205	0.44905	-1.52471	0.00172795	0.011876	yes
Unigene0020583	80.5	498	0.7688	4.75735	2.62948	3.30688e-24	1.94767e-22	yes
Unigene0020587	2	18	0.05335	0.47725	3.16119	0.00213223	0.0143115	yes
Unigene0020590	7	67.5	0.1001	0.9273	3.21159	3.91216e-05	0.000381557	yes
Unigene0020591	2319	584	54.6431	13.9171	-1.97318	7.96437e-24	4.60634e-22	yes
Unigene0020592	0	14.5	0.001	0.76995	9.58862	0.000100621	0.000904015	yes
Unigene0020597	134	12	2.0614	0.1841	-3.48506	8.71143e-19	3.59506e-17	yes
Unigene0020619	16	0	0.56805	0.001	-9.14987	0.000130417	0.00114662	yes
Unigene0020620	40.5	1	0.80155	0.0186	-5.42942	2.55176e-10	5.0773e-09	yes
Unigene0020630	74.5	29	1.0804	0.4325	-1.32079	0.00152027	0.0105832	yes
Unigene0020641	157	376	3.38815	8.1275	1.26231	1.17493e-08	1.93452e-07	yes
Unigene0020646	1973.5	570.5	20.9562	6.10915	-1.77833	4.27459e-34	4.33799e-32	yes
Unigene0020648	415	148	5.2047	1.8235	-1.5131	3.62402e-07	4.88192e-06	yes
Unigene0020649	107	40.5	3.19975	1.22925	-1.38018	0.001102	0.00794283	yes
Unigene0020657	1331.5	354.5	22.8227	6.10155	-1.90322	5.6977e-44	8.96492e-42	yes
Unigene0020659	37.5	11	0.7627	0.21985	-1.7946	0.00250385	0.0165322	yes
Unigene0020665	57	6.5	1.1663	0.12775	-3.19054	2.67553e-08	4.20734e-07	yes
Unigene0020670	118.5	607	1.7643	9.08505	2.3644	4.75093e-38	5.85533e-36	yes
Unigene0020673	61	19.5	0.67535	0.21575	-1.64627	0.000289457	0.00238403	yes
Unigene0020686	9.5	0	0.30835	0.001	-8.26843	0.00570706	0.0338836	yes
Unigene0020691	26	3.5	0.83105	0.1209	-2.78112	0.00291497	0.0189196	yes
Unigene0020693	155.5	16	2.35905	0.249	-3.24399	6.59613e-13	1.69795e-11	yes
Unigene0020694	21	2	0.54965	0.0529	-3.37717	0.000624956	0.00477422	yes
Unigene0020725	285	69	3.3388	0.79645	-2.06767	1.62826e-10	3.31222e-09	yes
Unigene0020726	168.5	27	2.931	0.4615	-2.66699	4.17337e-12	9.97625e-11	yes
Unigene0020732	4174.5	1610.5	23.4809	9.06005	-1.3739	2.18159e-23	1.21294e-21	yes
Unigene0020735	101	40	1.37625	0.54625	-1.33311	2.06408e-05	0.000211832	yes
Unigene0020754	10	55	0.24575	1.3306	2.43681	1.02194e-05	0.000110641	yes
Unigene0020755	10	73	0.4189	3.1253	2.89932	9.77182e-06	0.000106279	yes
Unigene0020761	4142.5	1718.5	90.6442	37.6245	-1.26854	8.45708e-31	7.07105e-29	yes
Unigene0020762	22	3.5	0.61715	0.1021	-2.59564	0.0011949	0.008528	yes
Unigene0020765	53	23	1.0732	0.4656	-1.20476	0.00377512	0.0237158	yes
Unigene0020767	11.5	178.5	0.3771	5.85765	3.9573	1.76708e-25	1.12185e-23	yes
Unigene0020769	55.5	0	1.9588	0.001	-10.9358	1.08218e-14	3.25717e-13	yes
Unigene0020780	62	3	2.7952	0.146	-4.25891	2.60902e-11	5.80234e-10	yes
Unigene0020790	108.5	19.5	1.1054	0.1957	-2.49785	1.12184e-08	1.85271e-07	yes
Unigene0020804	1080.5	478	11.0862	4.9449	-1.16475	7.70018e-16	2.54027e-14	yes
Unigene0020811	439.5	2967.5	6.17465	41.4138	2.74568	1.03561e-55	2.67971e-53	yes
Unigene0020812	470.5	147.5	7.1692	2.2318	-1.6836	2.07898e-13	5.63315e-12	yes
Unigene0020813	34	409	0.6413	7.47385	3.54278	1.90416e-12	4.66412e-11	yes
Unigene0020826	56	135.5	0.716	1.75575	1.29406	1.23635e-05	0.000131789	yes
Unigene0020827	1754.5	596	14.5859	4.95205	-1.55847	5.168e-32	4.60298e-30	yes
Unigene0020833	13.5	0.5	0.48905	0.01955	-4.64474	0.000854974	0.00633205	yes
Unigene0020834	11.5	0	0.5978	0.001	-9.22352	0.000671609	0.00509979	yes
Unigene0020835	26.5	1	0.7288	0.02965	-4.61942	2.35786e-06	2.8256e-05	yes
Unigene0020844	161	48	3.0607	0.91775	-1.73769	2.33449e-08	3.69659e-07	yes
Unigene0020869	19.5	1.5	0.66855	0.0555	-3.59048	0.000332432	0.00270699	yes
Unigene0020879	300.5	70.5	9.13225	2.1646	-2.07687	1.38482e-15	4.47917e-14	yes
Unigene0020901	1	69	0.0222	1.55915	6.13406	3.36861e-17	1.22287e-15	yes
Unigene0020917	52	11.5	0.7579	0.17085	-2.14928	2.60382e-05	0.000262778	yes
Unigene0020929	67	276	0.5536	2.28485	2.04518	1.34365e-16	4.68458e-15	yes
Unigene0020945	19	1	0.56115	0.03185	-4.13902	0.000122847	0.00108601	yes
Unigene0020957	285	111.5	2.6374	1.02665	-1.36117	3.95356e-09	6.88977e-08	yes
Unigene0020959	90	28	1.6738	0.52815	-1.66411	2.48754e-06	2.97058e-05	yes
Unigene0020971	29.5	10	0.8079	0.27665	-1.54611	0.00877999	0.0489903	yes
Unigene0020983	2404.5	78.5	29.6867	1.01015	-4.87718	1.39653e-35	1.55291e-33	yes
Unigene0021007	2907.5	295.5	28.3583	2.91855	-3.28044	3.44746e-110	3.53757e-107	yes
Unigene0021008	80	180.5	0.7827	1.78705	1.19105	4.73427e-05	0.000454034	yes
Unigene0021025	1.5	19.5	0.06765	0.8417	3.63714	0.00706382	0.0407341	yes
Unigene0021026	0	17	0.001	0.6344	9.30925	0.000370991	0.00298884	yes
Unigene0021032	379.5	165	2.1603	0.93825	-1.20319	2.53449e-09	4.50889e-08	yes
Unigene0021065	636.5	29.5	9.9536	0.4809	-4.37141	5.96997e-18	2.30189e-16	yes
Unigene0021068	7	58.5	0.31485	2.70105	3.10078	5.06576e-07	6.69849e-06	yes
Unigene0021072	264	49	5.16205	0.97215	-2.40869	6.10382e-18	2.34853e-16	yes
Unigene0021095	49	18	0.7743	0.29135	-1.41014	0.00406125	0.0252662	yes
Unigene0021096	42.5	139	0.79855	2.6226	1.71554	1.37064e-08	2.22987e-07	yes
Unigene0021100	29.5	5	1.4453	0.2539	-2.50904	0.000373365	0.00300397	yes
Unigene0021117	799	128.5	13.857	2.2489	-2.62332	8.99956e-21	4.24316e-19	yes
Unigene0021141	374	98	4.788	1.2638	-1.92165	2.90903e-20	1.31916e-18	yes
Unigene0021145	1969	944.5	17.3407	8.40775	-1.04437	2.38327e-15	7.56521e-14	yes
Unigene0021159	448.5	174.5	3.7683	1.4632	-1.36479	1.30534e-12	3.24688e-11	yes
Unigene0021166	68.5	21	2.4338	0.715	-1.7672	0.00467079	0.0284902	yes
Unigene0021168	81.5	14	2.0215	0.3434	-2.55746	2.13207e-09	3.82791e-08	yes
Unigene0021181	87.5	23	1.6709	0.4421	-1.91818	1.2253e-07	1.76935e-06	yes
Unigene0021191	1981.5	884.5	14.7137	6.56535	-1.16422	5.89776e-20	2.6459e-18	yes
Unigene0021199	17	1.5	1.12125	0.09265	-3.59717	0.00887093	0.049427	yes
Unigene0021204	8.5	311	0.16145	5.9289	5.19861	3.298e-54	8.03857e-52	yes
Unigene0021206	75	18.5	1.9538	0.4758	-2.03786	4.03481e-05	0.0003927	yes
Unigene0021207	1116	178.5	7.84605	1.2615	-2.63683	6.60105e-66	2.45173e-63	yes
Unigene0021216	3.5	74.5	0.08755	1.8943	4.43541	3.92227e-14	1.1271e-12	yes
Unigene0021239	34	0	0.94665	0.001	-9.88669	1.04343e-10	2.16532e-09	yes
Unigene0021260	19	3	0.6601	0.1076	-2.61701	0.00214669	0.0143933	yes
Unigene0021265	20	1.5	1.12735	0.08325	-3.75934	0.000422918	0.00336155	yes
Unigene0021267	18	2	0.5613	0.06735	-3.05902	0.00211218	0.014202	yes
Unigene0021269	5899	2471	35.7634	15.0353	-1.25013	1.51759e-37	1.80124e-35	yes
Unigene0021275	35.5	1	0.99615	0.03025	-5.04136	4.75846e-08	7.27127e-07	yes
Unigene0021279	559.5	271	9.5336	4.69685	-1.02133	1.29639e-06	1.62117e-05	yes
Unigene0021288	2.5	85.5	0.0477	1.6939	5.15022	5.67049e-11	1.20748e-09	yes
Unigene0021294	2352	894.5	58.8137	22.3929	-1.39311	2.78264e-27	1.94778e-25	yes
Unigene0021295	5326	2574	142.096	69.0246	-1.04168	2.09065e-26	1.39372e-24	yes
Unigene0021297	100.5	43	0.76355	0.3293	-1.21332	9.64161e-05	0.000868955	yes
Unigene0021303	414	169	6.01755	2.52055	-1.25544	7.57222e-06	8.38597e-05	yes
Unigene0021311	78	22.5	0.7178	0.2078	-1.78839	7.23265e-05	0.000670553	yes
Unigene0021318	9	59	0.54685	3.65285	2.73981	2.0243e-07	2.83537e-06	yes
Unigene0021320	101.5	42	1.06475	0.43115	-1.30425	0.0021462	0.0143918	yes
Unigene0021321	761	375	19.8474	9.7886	-1.01978	2.91945e-11	6.45852e-10	yes
Unigene0021329	2	17	0.09385	0.81135	3.1119	0.00362359	0.0229009	yes
Unigene0021331	13	1	0.6266	0.04525	-3.79156	0.00412286	0.0256028	yes
Unigene0021332	5	68	0.12815	1.7767	3.79329	4.50607e-09	7.80529e-08	yes
Unigene0021341	598.5	2546.5	9.17	39.1547	2.09419	2.49458e-67	9.45827e-65	yes
Unigene0021354	23.5	6	0.46995	0.12115	-1.95571	0.00464246	0.0283491	yes
Unigene0021355	16.5	1.5	0.38535	0.03295	-3.54782	0.00310079	0.0199784	yes
Unigene0021357	19	0.5	0.75615	0.0215	-5.13626	0.000132073	0.00116062	yes
Unigene0021358	26.5	3	0.5787	0.06775	-3.09452	0.000102526	0.000920524	yes
Unigene0021359	1744.5	18915	22.2055	241.723	3.44436	2.77421e-247	3.78666e-243	yes
Unigene0021367	725	321	12.4478	5.6027	-1.1517	2.04991e-09	3.68768e-08	yes
Unigene0021372	1	17.5	0.0259	0.46185	4.1564	0.000250912	0.00209277	yes
Unigene0021398	63.5	8.5	2.4819	0.3309	-2.90698	1.65747e-08	2.66631e-07	yes
Unigene0021406	179.5	65.5	1.3964	0.5169	-1.43376	9.46956e-06	0.000103239	yes
Unigene0021428	6236	1743	56.6065	15.8831	-1.83348	5.06298e-75	2.38301e-72	yes
Unigene0021445	643	62.5	9.1434	0.9001	-3.34457	1.6834e-44	2.72731e-42	yes
Unigene0021450	48.5	12.5	0.92895	0.2506	-1.89021	0.00206661	0.0139265	yes
Unigene0021452	99.5	30	3.931	1.20695	-1.70353	2.27829e-06	2.73686e-05	yes
Unigene0021454	207	65.5	2.971	0.9532	-1.6401	6.77867e-10	1.28955e-08	yes
Unigene0021469	16	1.5	0.6249	0.0631	-3.30791	0.00575574	0.0341318	yes
Unigene0021487	35	6.5	0.88055	0.1661	-2.40635	0.000105108	0.00094108	yes
Unigene0021490	27.5	336	0.43775	5.4082	3.62697	5.76467e-37	6.66821e-35	yes
Unigene0021493	38.5	13.5	0.93035	0.32675	-1.50959	0.00211288	0.0142051	yes
Unigene0021506	48	2.5	1.41955	0.0694	-4.35435	1.20966e-09	2.23124e-08	yes
Unigene0021524	309.5	151.5	5.8551	2.8595	-1.03393	1.85678e-06	2.26489e-05	yes
Unigene0021554	29	70	0.9134	2.18655	1.25934	0.00165378	0.0114237	yes
Unigene0021558	516	182	11.8968	4.17865	-1.50946	7.01264e-15	2.15341e-13	yes
Unigene0021570	24.5	3.5	0.65405	0.0934	-2.80791	0.00028579	0.00235632	yes
Unigene0021580	89.5	573	1.86275	11.8867	2.67384	2.02172e-32	1.84585e-30	yes
Unigene0021583	2356	621.5	24.7262	6.58515	-1.90875	6.10195e-47	1.10316e-44	yes
Unigene0021587	374	173	7.3851	3.44755	-1.09905	5.34558e-05	0.000508641	yes
Unigene0021588	4489.5	743.5	142.07	23.6843	-2.5846	2.25808e-95	1.66603e-92	yes
Unigene0021618	234.5	694.5	6.28195	18.7232	1.57554	1.34214e-20	6.23116e-19	yes
Unigene0021619	440	38.5	10.6094	0.948	-3.48431	2.45207e-42	3.59888e-40	yes
Unigene0021624	10	0	0.38385	0.001	-8.5844	0.00204924	0.0138248	yes
Unigene0021625	17	0	0.698	0.001	-9.44708	1.96787e-05	0.000202759	yes
Unigene0021628	75.5	15	1.51135	0.30465	-2.31061	4.93671e-08	7.52679e-07	yes
Unigene0021644	63	27.5	1.04465	0.45015	-1.21454	0.00320737	0.0205849	yes
Unigene0021646	2581	672	30.183	7.93935	-1.92664	4.73771e-50	9.68801e-48	yes
Unigene0021658	470.5	227.5	18.4763	9.0385	-1.03152	2.88643e-08	4.51946e-07	yes
Unigene0021664	555.5	58.5	11.2855	1.1947	-3.23975	7.39678e-54	1.77127e-51	yes
Unigene0021670	26.5	6.5	0.85265	0.20975	-2.02328	0.00387475	0.0242635	yes
Unigene0021671	142	586	1.9855	8.15675	2.03849	2.21968e-21	1.08788e-19	yes
Unigene0021673	17	1.5	0.5242	0.0499	-3.39301	0.00137665	0.00968588	yes
Unigene0021674	1023	237	20.4559	4.81285	-2.08755	9.57318e-28	6.85927e-26	yes
Unigene0021690	688	238.5	6.9419	2.4217	-1.51931	4.63812e-21	2.2155e-19	yes
Unigene0021692	9	154	0.5751	9.8777	4.10229	8.61231e-26	5.55153e-24	yes
Unigene0021694	14	48.5	0.56565	1.97645	1.80493	9.6091e-05	0.000866454	yes
Unigene0021699	1276	11290	11.1586	99.1232	3.15106	5.59716e-140	9.54981e-137	yes
Unigene0021707	4.5	20	0.17435	0.7662	2.13573	0.00714953	0.0411664	yes
Unigene0021719	16	0	0.59635	0.001	-9.22002	3.35362e-05	0.000330785	yes
Unigene0021724	124.5	250	3.097	6.26795	1.01712	3.48267e-06	4.06557e-05	yes
Unigene0021738	27.5	3	0.51925	0.0585	-3.14992	2.8941e-05	0.000289294	yes
Unigene0021766	8	36	0.18305	0.8185	2.16074	0.000190058	0.0016234	yes
Unigene0021775	130.5	43	4.04345	1.34765	-1.58514	7.9738e-07	1.02755e-05	yes
Unigene0021781	2413	495	29.5845	6.0778	-2.28322	4.8401e-74	2.18396e-71	yes
Unigene0021791	132.5	44	2.92705	0.98405	-1.57264	1.31684e-07	1.89153e-06	yes
Unigene0021795	788	379	7.1837	3.4855	-1.04336	5.20068e-12	1.22761e-10	yes
Unigene0021798	101	38	2.399	0.88955	-1.43129	9.89656e-05	0.000890315	yes
Unigene0021801	19.5	0.5	1.35485	0.0375	-5.1751	1.72974e-05	0.000180161	yes
Unigene0021806	37	15	0.78415	0.31795	-1.30233	0.00767664	0.0437188	yes
Unigene0021807	4411	1841.5	31.5541	13.3372	-1.24237	1.15429e-21	5.78712e-20	yes
Unigene0021817	46	12	0.7624	0.19345	-1.97859	0.00208835	0.0140615	yes
Unigene0021821	2	20.5	0.0625	0.62355	3.31858	0.00191564	0.0130266	yes
Unigene0021825	41	7	0.88925	0.15485	-2.52172	9.46174e-06	0.000103174	yes
Unigene0021832	6416.5	2895.5	51.8138	23.6529	-1.13132	1.02364e-21	5.14155e-20	yes
Unigene0021841	57	3	5.1496	0.27355	-4.23458	1.21982e-12	3.04526e-11	yes
Unigene0021842	1546.5	170.5	28.6783	3.1923	-3.16729	5.69944e-92	3.93897e-89	yes
Unigene0021857	80.5	34	1.34645	0.57425	-1.22941	0.000414973	0.00330562	yes
Unigene0021858	1292.5	3507	17.5179	47.5855	1.44169	5.4972e-37	6.37231e-35	yes
Unigene0021874	32	8.5	0.8303	0.22335	-1.89433	0.00186867	0.0127389	yes
Unigene0021898	50	13.5	1.4589	0.38245	-1.93154	0.000501597	0.0039191	yes
Unigene0021901	0	14	0.001	0.48075	8.90914	0.000170171	0.00146476	yes
Unigene0021903	151	32	4.0172	0.88195	-2.18742	6.60072e-08	9.92253e-07	yes
Unigene0021904	59	21	1.0595	0.38195	-1.47193	0.000240974	0.00201573	yes
Unigene0021924	67.5	226.5	2.1446	7.1591	1.73907	2.04956e-09	3.68768e-08	yes
Unigene0021933	16	64.5	0.2422	0.97435	2.00824	1.04895e-05	0.000113251	yes
Unigene0021940	86	26.5	3.4724	1.0537	-1.72047	3.90271e-05	0.000380773	yes
Unigene0021942	5594	2411	104.551	45.3685	-1.20444	2.36228e-15	7.50296e-14	yes
Unigene0021950	210	31	2.32255	0.3436	-2.75691	1.42799e-20	6.61846e-19	yes
Unigene0021968	336.5	61.5	6.59445	1.21455	-2.44083	1.83146e-26	1.22542e-24	yes
Unigene0021981	7230.5	3084.5	132.009	56.5746	-1.22241	5.47621e-38	6.68882e-36	yes
Unigene0021986	2055	390.5	53.9419	10.3256	-2.38518	1.7013e-71	7.09064e-69	yes
[truncated: 2,948 more rows]
